# Supplementary material for: Extreme genomic erosion after recurrent demographic bottlenecks in the highly endangered Iberian lynx
Source: Genome Biol. 2016 Dec 14;17:251. doi: 10.1186/s13059-016-1090-1 (PMC5155386; doi:10.1186/s13059-016-1090-1)
Supplement: Additional file 2: — Supplemental datasheets. Datasheet S1: Summary of the annotation of the human and felid degradomes. Datasheet S2: List of orphan genes with expression levels in different organs. Datasheet S3: List of potential chromosomal rearrangements with respect to domestic cat. Datasheet S4: Gene Ontology terms enriched in proteins that duplicated at specific points in the lynx, cat, and tiger phylogeny. Datasheet S5: List of putative pseudogenes. Datasheet S6: Partitions identified by Saguaro as yielding alternative topologies from a whole genome alignment of Felidae. Datasheet S7: List of genes with signatures of positive selection. Datasheet S8: List of Gene Ontology terms significantly enriched in windows of high and low diversity in Iberian lynx populations or of high of low difference with respect to Eurasian. (XLSX 340 kb) [file 13059_2016_1090_MOESM2_ESM.xlsx]

## Sheet: S1-Proteases
Datasheet S1. Summary of the annotation of the Human and Felid Degradomes. Orthology was set automatically as 1-to-1 or 1-to-many based on pairwise Blast alignments. The term Present means that the gene probably exists, but the sequence made annotation difficult. The term Partial means that a similar sequence was found on the genome, but it was lacking large stretches.
Human	Cat	Lynx
a01h_bace	ENSFCAP00000000163	a01l_bace
a01h_bace2	ENSFCAP00000001821	a01l_bace2
a01h_ctsd	ENSFCAP00000007246	Partial
a01h_ctse	ENSFCAP00000006256	a01l_ctse
a01h_cymp	ENSFCAP00000012681	Present
a01h_nap1	ENSFCAP00000000296	Present
a01h_nap2	-	-
a01h_pepa	ENSFCAP00000012681	Present
a01h_pga	-	-
a01h_pgc	ENSFCAP00000013671	a01l_pgc
a01h_ren1	ENSFCAP00000002671	Present
a02h_ddi1	-	-
a02h_ddi2	ENSFCAP00000015121	a02l_ddi1
a02h_ddirp	ENSFCAP00000017297	a02l_ddirp
a02h_nrip2	ENSFCAP00000022427	a02l_nrip2
a02h_nrip3	ENSFCAP00000021330	a02l_nrip3
a22h_psen1	ENSFCAP00000016729	a22l_psen1
a22h_psen2	ENSFCAP00000008142	a22l_psen2
a22h_psh1	ENSFCAP00000023817	a22l_psh1
a22h_psh2	ENSFCAP00000003184	Present
a22h_psh3	ENSFCAP00000013601	a22l_psh3
a22h_psh4	ENSFCAP00000021994	a22l_psh5
a22h_psh5	ENSFCAP00000021994	a22l_psh5
ax1h_pip	Partial	ax1l_pip
c01h_blmh	ENSFCAP00000003738	c01l_blmh
c01h_ctsb	ENSFCAP00000013951	c01l_ctsb
c01h_ctsc	ENSFCAP00000007830	c01l_ctsc
c01h_ctsf	ENSFCAP00000006851	c01l_ctsf
c01h_ctsh	ENSFCAP00000011317	c01l_ctsh
c01h_ctsk	ENSFCAP00000003357	c01l_ctsk
c01h_ctsl	ENSFCAP00000019080, other	c01l_ctsl1, c01l_ctsl2, c01l_ctsl3*, c01l_ctsl4*, c01l_ctsl5*, c01l_ctsl6, c01l_ctsl7, c01l_ctsl8, c01l_ctsl9*
c01h_ctsl2	-	-
c01h_ctso	ENSFCAP00000017958	c01l_ctso
c01h_ctss	ENSFCAP00000003356	c01l_ctss
c01h_ctsw	ENSFCAP00000005174	Present
c01h_ctsz	ENSFCAP00000000785	c01l_ctsz
c01h_lcn7	ENSFCAP00000014525	c01l_lcn7
c01h_tinag	ENSFCAP00000008479	c01l_tinag
c02h_capn1	ENSFCAP00000001335, ENSFCAP00000012558, ENSFCAP00000015589	c02l_capn3, c02l_capn1, c02l_capn9, c02l_capn11, c02l_capn2
c02h_capn10	ENSFCAP00000011568	c02l_capn10
c02h_capn11	ENSFCAP00000001335, ENSFCAP00000009051	c02l_capn1, c02l_capn11
c02h_capn12	ENSFCAP00000000774	c02l_capn12
c02h_capn13	-	-
c02h_capn14	ENSFCAP00000016077	c02l_capn14
c02h_capn15	ENSFCAP00000024795	c02l_capn15
c02h_capn2	ENSFCAP00000009907, ENSFCAP00000001335, ENSFCAP00000009909, ENSFCAP00000012558, ENSFCAP00000015589	c02l_capn3, c02l_capn1, c02l_capn11, c02l_capn2
c02h_capn3	ENSFCAP00000001335, ENSFCAP00000012558, ENSFCAP00000015589	c02l_capn1, c02l_capn3, c02l_capn11, c02l_capn9
c02h_capn5	ENSFCAP00000013398	c02l_capn5
c02h_capn6	ENSFCAP00000010690	c02l_capn6
c02h_capn7	ENSFCAP00000025164	c02l_capn7
c02h_capn7l	ENSFCAP00000024083	c02l_capn7l
c02h_capn8	ENSFCAP00000009907	Present
c02h_capn9	ENSFCAP00000001335, ENSFCAP00000012558	c02l_capn1, c02l_capn9
c12h_bap1	ENSFCAP00000014571	c12l_bap1
c12h_uchl1	Partial	c12l_uchl1
c12h_uchl3	ENSFCAP00000016969	c12l_uchl3l
c12h_uchl5	ENSFCAP00000015835	Present
c13h_lgmn	ENSFCAP00000007305	c13l_lgmn
c13h_lgmn2	ENSFCAP00000007305	c13l_lgmn
c13h_pigk	Partial	c13l_pigk
c14h_casp1	-	-
c14h_casp10	ENSFCAP00000004373	c14l_casp10
c14h_casp12	Partial	c14l_casp12
c14h_casp14	ENSFCAP00000007294	c14l_casp14
c14h_casp14l	ENSFCAP00000021059	c14l_casp14l
c14h_casp2	ENSFCAP00000016046	c14l_casp2
c14h_casp3	ENSFCAP00000020966	c14l_casp3
c14h_casp4	ENSFCAP00000019696	c14l_casp4
c14h_casp5	-	-
c14h_casp6	ENSFCAP00000003138	c14l_casp6
c14h_casp7	ENSFCAP00000010977	c14l_casp7
c14h_casp8	ENSFCAP00000023613	c14l_casp8
c14h_casp9	ENSFCAP00000018153	c14l_casp9
c14h_cflar	ENSFCAP00000004371	c14l_cflar
c14h_iceyh	-	-
c14h_malt1	ENSFCAP00000012971	c14l_malt1
c15h_pgpep1	ENSFCAP00000009023	c15l_pgpep1
c15h_pgpep2	-	-
c19h_usp1	ENSFCAP00000022589	c19l_usp1
c19h_usp10	ENSFCAP00000010062, ENSFCAP00000022754	c19l_usp10
c19h_usp11	ENSFCAP00000009141, ENSFCAP00000001299, ENSFCAP00000015463	c19l_usp15, c19l_usp4
c19h_usp12	ENSFCAP00000024191	c19l_usp12
c19h_usp13	ENSFCAP00000024166, ENSFCAP00000003944	c19l_usp13, c19l_usp5
c19h_usp14	ENSFCAP00000014613	c19l_usp14
c19h_usp15	ENSFCAP00000001299, ENSFCAP00000009141, ENSFCAP00000015463	c19l_usp15, c19l_usp4
c19h_usp16	ENSFCAP00000012721	c19l_usp16
c19h_usp17	Present	c19l_usp17
c19h_usp17l	-	-
c19h_usp18	ENSFCAP00000019001	c19l_usp18
c19h_usp19	Present	c19l_usp19
c19h_usp2	ENSFCAP00000000913	c19l_usp2
c19h_usp20	ENSFCAP00000019634, ENSFCAP00000012564	c19l_usp20
c19h_usp21	ENSFCAP00000009119	c19l_usp21
c19h_usp22	ENSFCAP00000021338, ENSFCAP00000022100, ENSFCAP00000003263	c19l_usp27, c19l_usp22
c19h_usp24	ENSFCAP00000008172, ENSFCAP00000011099	c19l_usp9x, c19l_usp24
c19h_usp25	ENSFCAP00000000196, ENSFCAP00000004608	c19l_usp28, c19l_usp25
c19h_usp26	ENSFCAP00000016646	c19l_usp26
c19h_usp27	ENSFCAP00000021338, ENSFCAP00000003263	c19l_usp27, c19l_usp22
c19h_usp28	ENSFCAP00000000196, ENSFCAP00000004608	c19l_usp28, c19l_usp25
c19h_usp29	ENSFCAP00000016646	c19l_usp26
c19h_usp3	ENSFCAP00000018668	c19l_usp3
c19h_usp30	ENSFCAP00000007739	c19l_usp30
c19h_usp31	ENSFCAP00000004793	c19l_usp31
c19h_usp32	ENSFCAP00000020387	c19l_usp32
c19h_usp33	ENSFCAP00000019634, ENSFCAP00000012564	c19l_usp20
c19h_usp34	ENSFCAP00000008795	c19l_usp34
c19h_usp35	ENSFCAP00000006913	Present
c19h_usp36	ENSFCAP00000023667	c19l_usp36
c19h_usp37	ENSFCAP00000002195	c19l_usp37
c19h_usp38	ENSFCAP00000018565	c19l_usp38
c19h_usp39	ENSFCAP00000011108	c19l_usp39
c19h_usp4	ENSFCAP00000001299, ENSFCAP00000009141, ENSFCAP00000015463	c19l_usp15, c19l_usp4
c19h_usp40	ENSFCAP00000023497, ENSFCAP00000025460	c19l_usp40
c19h_usp41	-	-
c19h_usp42	ENSFCAP00000002016	c19l_usp42
c19h_usp43	ENSFCAP00000020575	c19l_usp43
c19h_usp44	ENSFCAP00000008955	c19l_usp44
c19h_usp45	ENSFCAP00000006645	c19l_usp45
c19h_usp46	ENSFCAP00000013262, ENSFCAP00000024191	c19l_usp46, c19l_usp12
c19h_usp47	ENSFCAP00000000858, ENSFCAP00000017283	c19l_usp47
c19h_usp48	ENSFCAP00000002732, ENSFCAP00000018171, ENSFCAP00000024615	c19l_usp48
c19h_usp49	ENSFCAP00000008955	c19l_usp44
c19h_usp5	ENSFCAP00000024166, ENSFCAP00000003944	c19l_usp13, c19l_usp5
c19h_usp50	ENSFCAP00000007975	c19l_usp50
c19h_usp51	ENSFCAP00000021338, ENSFCAP00000003263	c19l_usp27, c19l_usp22
c19h_usp52	ENSFCAP00000011153	c19l_usp52
c19h_usp53	ENSFCAP00000013424	c19l_usp53
c19h_usp54	ENSFCAP00000012725	c19l_usp54
c19h_usp6	ENSFCAP00000020387	c19l_usp32
c19h_usp7	ENSFCAP00000003773	c19l_usp7
c19h_usp8	ENSFCAP00000025412, ENSFCAP00000007974	c19l_usp8
c19h_usp9x	ENSFCAP00000008172, ENSFCAP00000011099	c19l_usp9x
c19h_usp9y	ENSFCAP00000008172, ENSFCAP00000011099	c19l_usp9x
c26h_ggh	ENSFCAP00000011784	c26l_ggh
c44h_gfpt1	ENSFCAP00000007036, ENSFCAP00000004130	c44l_gfpt1, c44l_gfpt2
c44h_gfpt2	ENSFCAP00000007036, ENSFCAP00000004130	c44l_gfpt1, c44l_gfpt2
c44h_gfpt3	-	-
c44h_ppat	ENSFCAP00000019872	c44l_ppat
c46h_dhh	ENSFCAP00000000089	c46l_dhh
c46h_ihh	ENSFCAP00000017498	c46l_ihh
c46h_shh	-	-
c48h_senp1	ENSFCAP00000012985	c48l_senp1
c48h_senp2	ENSFCAP00000004977	c48l_senp2
c48h_senp3	ENSFCAP00000008917	c48l_senp3
c48h_senp5	ENSFCAP00000003532	c48l_senp5
c48h_senp6	ENSFCAP00000023868	c48l_senp6
c48h_senp7	ENSFCAP00000017502	c48l_senp7
c48h_senp8	ENSFCAP00000000603	c48l_senp8
c50h_espl1	ENSFCAP00000005456	c50l_espl1
c54h_autl1	ENSFCAP00000013250	c54l_autl1
c54h_autl2	ENSFCAP00000004808	c54l_autl2
c54h_autl3	ENSFCAP00000023581	c54l_autl3
c54h_autl4	ENSFCAP00000004513	c54l_autl4
c56h_dj1	ENSFCAP00000019507	c56l_dj1
c64h_cezanne	ENSFCAP00000010707, ENSFCAP00000009386	c64l_cezanne
c64h_cezanne2	ENSFCAP00000009386, ENSFCAP00000010707	c64l_cezanne, c64l_cezanne2
c64h_cgi77	ENSFCAP00000018358	c64l_cgi-77
c64h_cgi-77	ENSFCAP00000018358	c64l_cgi-77
c64h_hshin1	ENSFCAP00000025171	c64l_hshin1
c64h_hshin2	ENSFCAP00000009869	c64l_hshin2
c64h_hshin3	ENSFCAP00000021007	c64l_hshin3
c64h_hshin4	Partial	c64l_hshin4
c64h_hshin5	ENSFCAP00000002370	c64l_hshin5
c64h_hshin6	ENSFCAP00000021771	c64l_cgi77
c64h_hshin7	ENSFCAP00000012831	c64l_hshin7
c64h_otub1	ENSFCAP00000023949	Present
c64h_otub2	ENSFCAP00000009494	c64l_otub2
c64h_tnfaip3	ENSFCAP00000007537	c64l_tnfaip3
c64h_trabid	ENSFCAP00000002242	c64l_trabid
c64h_vcip135	ENSFCAP00000013471	c64l_vcip135
c67h_cyld1	ENSFCAP00000007887	c67l_cyld1
cx1h_hetfl	ENSFCAP00000013210	cx1l_hetfl
cx2h_atx3l	-	-
cx2h_jsph1	ENSFCAP00000002595	cx2l_jsph1
cx2h_mjd1	-	-
cx2h_srbi54	ENSFCAP00000013934	cx2l_srbi54
m01h_ampep	ENSFCAP00000004599, ENSFCAP00000004594	m01l_ampep, m01l_arts1, m01l_lnpep
m01h_anpep	ENSFCAP00000008319	m01l_anpep
m01h_aopep	ENSFCAP00000003412	m01l_aopep
m01h_aqpep	ENSFCAP00000025388	m01l_aqpep
m01h_arts1	ENSFCAP00000004599, ENSFCAP00000004594	m01l_arts1, m01l_lnpep
m01h_enpep	ENSFCAP00000000068	m01l_enpep *
m01h_lnpep	ENSFCAP00000004599, ENSFCAP00000004594	m01l_arts1, m01l_lnpep
m01h_lta4h	ENSFCAP00000015565	m01l_lta4h
m01h_npepps	ENSFCAP00000022045	m01l_npepps
m01h_npeppsl1	Present	m01l_npepps
m01h_rnpep	ENSFCAP00000000415	m01l_rnpep
m01h_rnpepl1	ENSFCAP00000011566	m01l_rnpepl1
m01h_taf2	ENSFCAP00000021608	m01l_taf2
m01h_trhde	ENSFCAP00000009157	m01l_trhde
m02h_ace	ENSFCAP00000001921	m02l_ace
m02h_ace2	ENSFCAP00000008647	m02l_ace2
m03h_mipep	ENSFCAP00000009124	m03l_mipep
m03h_nln	ENSFCAP00000019996, ENSFCAP00000014639	m03l_thop1, m03l_nln
m03h_thop1	ENSFCAP00000019996, ENSFCAP00000014639	m03l_thop1, m03l_nln
m08h_lmln	ENSFCAP00000016817	m08l_lmln
m10h_mmp1	ENSFCAP00000014645	m10l_mmp1
m10h_mmp10	ENSFCAP00000014646, ENSFCAP00000014650	m10l_mmp10, m10l_mmp3
m10h_mmp11	ENSFCAP00000014197	m10l_mmp11
m10h_mmp12	ENSFCAP00000010202	m10l_mmp12
m10h_mmp13	ENSFCAP00000000108	m10l_mmp13
m10h_mmp14	ENSFCAP00000006156	m10l_mmp14
m10h_mmp15	ENSFCAP00000002480	m10l_mmp15
m10h_mmp16	ENSFCAP00000017072, ENSFCAP00000017782	m10l_mmp24, m10l_mmp16
m10h_mmp17	ENSFCAP00000016934	m10l_mmp17
m10h_mmp19	ENSFCAP00000012951	m10l_mmp19
m10h_mmp2	ENSFCAP00000005513	m10l_mmp2
m10h_mmp20	ENSFCAP00000014642	m10l_mmp20
m10h_mmp21	ENSFCAP00000012046	Present
m10h_mmp23a	ENSFCAP00000007735	m10l_mmp23a
m10h_mmp23b	ENSFCAP00000007735	m10l_mmp23a
m10h_mmp24	ENSFCAP00000017782, ENSFCAP00000017072	m10l_mmp24, m10l_mmp16
m10h_mmp25	ENSFCAP00000022453	m10l_mmp25
m10h_mmp26	-	-
m10h_mmp27	ENSFCAP00000014643	m10l_mmp27
m10h_mmp28	ENSFCAP00000009644	m10l_mmp28
m10h_mmp3	ENSFCAP00000014646, ENSFCAP00000014650	m10l_mmp10, m10l_mmp3
m10h_mmp7	ENSFCAP00000014641	Present
m10h_mmp8	ENSFCAP00000014644	m10l_mmp8
m10h_mmp9	ENSFCAP00000012997	m10l_mmp9
m12h_adam10	ENSFCAP00000024420	m12l_adam10
m12h_adam11	ENSFCAP00000016027, ENSFCAP00000005067, ENSFCAP00000019797	m12l_adam23, m12l_adam11, m12l_adam22
m12h_adam12	ENSFCAP00000000754	m12l_adam19, m12l_adam12
m12h_adam15	ENSFCAP00000011286	m12l_adam15
m12h_adam17	ENSFCAP00000007272	m12l_adam17
m12h_adam18	ENSFCAP00000024660	Present
m12h_adam19	ENSFCAP00000009241	m12l_adam12, m12l_adam19
m12h_adam2	ENSFCAP00000019509	Partial
m12h_adam20	ENSFCAP00000018131, ENSFCAP00000023656, ENSFCAP00000023800	m12l_adam20, m12l_adam29, m12l_adam21
m12h_adam21	ENSFCAP00000018131, ENSFCAP00000023656, ENSFCAP00000023800	m12l_adam20, m12l_adam29, m12l_adam21
m12h_adam22	ENSFCAP00000016027, ENSFCAP00000005067, ENSFCAP00000019797	m12l_adam23, m12l_adam11, m12l_adam22
m12h_adam23	ENSFCAP00000005067, ENSFCAP00000016027, ENSFCAP00000019797	m12l_adam23, m12l_adam11, m12l_adam22
m12h_adam28	ENSFCAP00000008303	m12l_adam28
m12h_adam29	ENSFCAP00000018131, ENSFCAP00000023656, ENSFCAP00000023800	m12l_adam20, m12l_adam29, m12l_adam21
m12h_adam30	-	-
m12h_adam32	Present	m12l_adam32
m12h_adam33	ENSFCAP00000005893	m12l_adam33
m12h_adam3b	ENSFCAP00000024660	Present
m12h_adam5	ENSFCAP00000024660	Present
m12h_adam6	-	-
m12h_adam7	ENSFCAP00000012138	m12l_adam7
m12h_adam8	ENSFCAP00000016289	-
m12h_adam9	ENSFCAP00000002391	m12l_adam9
m12h_adamdec1	ENSFCAP00000003259	m12l_adamdec1
m12h_adamts1	ENSFCAP00000012358, ENSFCAP00000016986, ENSFCAP00000000460	m12l_adamts8, m12l_adamts5, m12l_adamts15, m12l_adamts1
m12h_adamts10	ENSFCAP00000014121, ENSFCAP00000009660	m12l_adamts6, m12l_adamts10, m12l_adamts18
m12h_adamts12	ENSFCAP00000015904, ENSFCAP00000002172	m12l_adamts12
m12h_adamts13	ENSFCAP00000021891	m12l_adamts13
m12h_adamts14	ENSFCAP00000004578, ENSFCAP00000001143, ENSFCAP00000015957, ENSFCAP00000025325	m12l_adamts14, m12l_adamts3, m12l_adamts2
m12h_adamts15	ENSFCAP00000012358, ENSFCAP00000007736, ENSFCAP00000016986, ENSFCAP00000002124, ENSFCAP00000010117	m12l_adamts20, m12l_adamts8, m12l_adamts9, m12l_adamts1, m12l_adamts15
m12h_adamts16	ENSFCAP00000009660, ENSFCAP00000003481	m12l_adamts18, m12l_adamts16
m12h_adamts17	ENSFCAP00000014176	m12l_adamts19
m12h_adamts18	ENSFCAP00000003481, ENSFCAP00000009660	m12l_adamts10, m12l_adamts18, m12l_adamts16
m12h_adamts19	Present	m12l_adamts17
m12h_adamts2	ENSFCAP00000004578, ENSFCAP00000001143, ENSFCAP00000015957, ENSFCAP00000025325	m12l_adamts3, m12l_adamts2
m12h_adamts20	ENSFCAP00000001452, ENSFCAP00000010117	m12l_adamts20, m12l_adamts9
m12h_adamts3	ENSFCAP00000001143, ENSFCAP00000004578, ENSFCAP00000015957, ENSFCAP00000025325	m12l_adamts14, m12l_adamts3
m12h_adamts4	ENSFCAP00000012358, ENSFCAP00000000460	m12l_adamts1
m12h_adamts5	ENSFCAP00000002124	m12l_adamts5
m12h_adamts6	ENSFCAP00000014121	m12l_adamts6, m12l_adamts10
m12h_adamts7	ENSFCAP00000015904, ENSFCAP00000002172	m12l_adamts12
m12h_adamts8	ENSFCAP00000007736, ENSFCAP00000012358, ENSFCAP00000016986, ENSFCAP00000021897	m12l_adamts8, m12l_adamts1
m12h_adamts9	ENSFCAP00000007736, ENSFCAP00000010117, ENSFCAP00000001452	m12l_adamts20, m12l_adamts9
m12h_bmp1	ENSFCAP00000012038, ENSFCAP00000012232, ENSFCAP00000006624	m12l_tll2, m12l_bmp1, m12l_tll1
m12h_hamet	ENSFCAP00000009930	m12l_hamet
m12h_mep1a	ENSFCAP00000008621	m12l_mep1a
m12h_mep1b	ENSFCAP00000013154	m12l_mep1b
m12h_tll1	ENSFCAP00000012038, ENSFCAP00000012232, ENSFCAP00000006624	m12l_tll2, m12l_bmp1, m12l_tll1
m12h_tll2	ENSFCAP00000012038, ENSFCAP00000012232, ENSFCAP00000006624	m12l_tll2, m12l_bmp1, m12l_tll1
m13h_ece1	ENSFCAP00000015858, ENSFCAP00000013479	m13l_ece1, m13l_ece2
m13h_ece2	ENSFCAP00000015858, ENSFCAP00000013479	m13l_ece1, m13l_ece2
m13h_ecel1	ENSFCAP00000005271	m13l_ecel1
m13h_kel	ENSFCAP00000013857	m13l_kel
m13h_kel1	ENSFCAP00000013857	m13l_kel
m13h_mme	ENSFCAP00000008831, ENSFCAP00000018016, ENSFCAP00000004265	m13l_mmel2, m13l_mme
m13h_mmel2	ENSFCAP00000018016, ENSFCAP00000008831	m13l_mmel2, m13l_mme
m13h_phex	Present	m13l_phex
m14h_aebp1	ENSFCAP00000013407, ENSFCAP00000012294, ENSFCAP00000013320	m14l_cpx2, m14l_cpx1
m14h_agbl2	ENSFCAP00000012801, ENSFCAP00000018061	m14l_agbl3, m14l_agbl2
m14h_agbl3	ENSFCAP00000012801, ENSFCAP00000018061	m14l_agbl3, m14l_agbl2
m14h_agbl5	ENSFCAP00000009170	m14l_agbl5
m14h_agtpbp1	ENSFCAP00000020761	m14l_agtpbp1
m14h_cpa1	ENSFCAP00000013206	m14l_cpa1
m14h_cpa2	ENSFCAP00000008645	m14l_cpa2
m14h_cpa3	ENSFCAP00000017625	m14l_cpa3
m14h_cpa4	ENSFCAP00000008650	m14l_cpa4
m14h_cpa5	ENSFCAP00000008653	m14l_cpa5
m14h_cpa6	ENSFCAP00000006726	m14l_cpa6
m14h_cpb1	ENSFCAP00000000206	m14l_cpb1
m14h_cpb2	ENSFCAP00000008509	m14l_cpb2
m14h_cpd	-	-
m14h_cpe	ENSFCAP00000011303	m14l_cpe
m14h_cpm	ENSFCAP00000013274	m14l_cpm
m14h_cpn	ENSFCAP00000000534	m14l_cpn
m14h_cpo	ENSFCAP00000002311	m14l_cpo
m14h_cpx1	ENSFCAP00000013407, ENSFCAP00000012294, ENSFCAP00000013320	m14l_cpx2, m14l_cpx1, m14l_aebp1
m14h_cpx2	ENSFCAP00000013407, ENSFCAP00000012294, ENSFCAP00000013320	m14l_cpx2, m14l_cpx1, m14l_aebp1
m14h_cpz	ENSFCAP00000014187	m14l_cpz
m16h_ampp	ENSFCAP00000006698	m16l_ampp
m16h_ide	ENSFCAP00000018455, ENSFCAP00000024611	m16l_ide
m16h_inpp5e	ENSFCAP00000006698	m16l_ampp
m16h_nrd1	-	-
m16h_pitrm1	ENSFCAP00000002986	m16l_pitrm1
m16h_pmpcb	ENSFCAP00000000589	m16l_pmpcb
m16h_uqcrc1	ENSFCAP00000001942	m16l_uqcrc1
m16h_uqcrc2	ENSFCAP00000007194	m16l_uqcrc2
m17h_lap3	ENSFCAP00000017007	m17l_lap3
m17h_npepl1	ENSFCAP00000016939	m17l_npepl1
m18h_dnpep	ENSFCAP00000010454	m18l_dnpep
m19h_dpep1	ENSFCAP00000003492	m19l_dpep1
m19h_dpep2	-	m19l_dpep2
m19h_dpep3	ENSFCAP00000011923	m19l_dpep3
m20h_acy1	ENSFCAP00000019690	m20l_acy1
m20h_cpgl	ENSFCAP00000007670	m20l_cpgl
m20h_cpgl2	ENSFCAP00000007672	m20l_cpgl2
m20h_hmralp	ENSFCAP00000013198	m20l_hmralp
m22h_osgep	ENSFCAP00000006435	m22l_osgep
m22h_osgep2	ENSFCAP00000014364	m22l_osgep2 *
m24h_metap1	ENSFCAP00000004623	m24l_metap1
m24h_metap2	ENSFCAP00000023707	m24l_metap2
m24h_metapl1	ENSFCAP00000002019	m24l_metapl1
m24h_pa2g4	ENSFCAP00000013784	m24l_pa2g4
m24h_pa2g4l	ENSFCAP00000013784	m24l_pa2g4
m24h_pepd	ENSFCAP00000007389	m24l_pepd
m24h_pepp	ENSFCAP00000017293	m24l_pepp
m24h_supt16h	ENSFCAP00000012851	m24l_supt16h
m24h_xpnpep1	ENSFCAP00000003247	m24l_xpnpep1
m24h_xpnpep2	ENSFCAP00000007478	m24l_xpnpep2
m28h_folh1	ENSFCAP00000019566, ENSFCAP00000007167	m28l_naalad2, m28l_folh1
m28h_naalad2	ENSFCAP00000019566, ENSFCAP00000007167	m28l_naalad2, m28l_folh1
m28h_naalad3	ENSFCAP00000012412	m28l_naalad3
m28h_naaladl	ENSFCAP00000005807	m28l_naaladl
m28h_ojp	ENSFCAP00000013832	m28l_ojp
m28h_pgcp	ENSFCAP00000016662	m28l_pgcp
m28h_qpct	ENSFCAP00000017418	m28l_qpct
m28h_qpct2	ENSFCAP00000011574	m28l_qpct2
m28h_tfr2	ENSFCAP00000006354	m28l_tfr2
m28h_tfrc	ENSFCAP00000003404	m28l_tfrc
m38h_cad	ENSFCAP00000020069, ENSFCAP00000014049	m38l_cad
m38h_crmp1	ENSFCAP00000003763, ENSFCAP00000004950, ENSFCAP00000007645, ENSFCAP00000018928	m38l_dpysl4, m38l_dpysl2, m38l_dpysl3
m38h_dpys	ENSFCAP00000008327	m38l_dpys
m38h_dpysl2	ENSFCAP00000003763, ENSFCAP00000004950, ENSFCAP00000007645, ENSFCAP00000018928	m38l_dpysl4, m38l_dpysl2, m38l_dpysl3
m38h_dpysl3	ENSFCAP00000003763, ENSFCAP00000004950, ENSFCAP00000007645, ENSFCAP00000018928	m38l_dpysl4, m38l_dpysl2, m38l_dpysl3
m38h_dpysl4	ENSFCAP00000003763, ENSFCAP00000004950, ENSFCAP00000007645, ENSFCAP00000018928	m38l_dpysl4, m38l_dpysl2, m38l_dpysl3
m38h_dpysl5	ENSFCAP00000001533	m38l_dpysl5
m41h_afg3l2	ENSFCAP00000017790, ENSFCAP00000006009	m41l_afg3l2
m41h_spg7	ENSFCAP00000003076	m41l_spg7
m41h_yme1l1	ENSFCAP00000013212	m41l_yme1l1
m43h_pappa	ENSFCAP00000006015, ENSFCAP00000010666	m43l_plac3, m43l_pappa
m43h_plac3	ENSFCAP00000006015, ENSFCAP00000010666	m43l_pappa, m43l_plac3
m47h_pcoln3	-	-
m48h_face1	ENSFCAP00000005314	m48l_face1
m48h_mprp1	ENSFCAP00000001280	m48l_mprp1
m49h_dpp3	ENSFCAP00000008633	m49l_dpp3
m50h_mbtps2	ENSFCAP00000017719	m50l_mbtps2
m67h_amsh	ENSFCAP00000011224	m67l_amsh
m67h_amsh2	ENSFCAP00000006662	m67l_amsh2
m67h_c61a	ENSFCAP00000015784	m67l_c61a
m67h_c61al	ENSFCAP00000015784	m67l_c61a
m67h_cops5	ENSFCAP00000003397	m67l_cops5
m67h_cops6	ENSFCAP00000003283	m67l_cops6
m67h_eif3s3	ENSFCAP00000021829	m67l_eif3s3
m67h_eif3s5	ENSFCAP00000021512	m67l_eif3s5
m67h_eif3s5b	ENSFCAP00000021512	m67l_eif3s5
m67h_ifp38	ENSFCAP00000021512	m67l_eif3s5
m67h_ifp38l	ENSFCAP00000021512	m67l_eif3s5
m67h_jamml1	ENSFCAP00000021471	m67l_jamml1
m67h_jamml2	ENSFCAP00000015329, ENSFCAP00000021649	-
m67h_poh1	ENSFCAP00000021424	m67l_poh1
m67h_prpf8	ENSFCAP00000005850	m67l_prpf8
m67h_psmd7	ENSFCAP00000017725	m67l_psmd7
mISP2	ENSFCAP00000004294	s01l_mastin
mx1h_face2	ENSFCAP00000023589	mx1l_face2
mx2h_acy3	Present	mx2l_acy3 *
mx2h_aspa	ENSFCAP00000021185	mx2l_aspa
mx3h_amz1	ENSFCAP00000007936	mx3l_amz1
mx3h_amz2	ENSFCAP00000015912	mx3l_amz2
s01h_acr	ENSFCAP00000009841	s01l_acr
s01h_azu1	-	-
s01h_bf	Present	s01l_bf
s01h_c1r	ENSFCAP00000000162	s01l_c1r
s01h_c1rl	ENSFCAP00000000164	Present
s01h_c1s	ENSFCAP00000000160	s01l_c1s
s01h_c2	Present	s01l_c2
s01h_cma1	ENSFCAP00000005206	s01l_cma1
s01h_ctrb	Present	s01l_ctrb
s01h_ctrc	ENSFCAP00000003015	s01l_ctrc
s01h_ctrl	ENSFCAP00000011920	s01l_ctrl
s01h_ctsg	ENSFCAP00000013695	s01l_ctsg
s01h_desc1	ENSFCAP00000025100	s01l_desc1
s01h_df	ENSFCAP00000006776	s01l_df
s01h_df2	ENSFCAP00000007259	s01l_df2
s01h_ela1	ENSFCAP00000004073	s01l_ela1
s01h_ela2	ENSFCAP00000024761	s01l_ela2
s01h_ela2a	-	-
s01h_ela2b	-	-
s01h_ela3a	-	-
s01h_ela3b	ENSFCAP00000019946	s01l_ela3a
s01h_eos	Present	s01l_eos
s01h_esspl	-	s01l_esspl *
s01h_f10	ENSFCAP00000013217	s01l_f10
s01h_f10l	ENSFCAP00000013217	s01l_f10
s01h_f11	ENSFCAP00000001438, ENSFCAP00000019782	s01l_klkb1, s01l_f11
s01h_f11l	ENSFCAP00000001438, ENSFCAP00000019782	s01l_klkb1, s01l_f11
s01h_f12	ENSFCAP00000001428	s01l_f12
s01h_f2	ENSFCAP00000017324	s01l_f2
s01h_f7	ENSFCAP00000013216	s01l_f7
s01h_f9	ENSFCAP00000006767	s01l_f9
s01h_gzma	ENSFCAP00000007580	s01l_gzma
s01h_gzmb	ENSFCAP00000002661	s01l_gzmb
s01h_gzmh	ENSFCAP00000017556	s01l_gzmh
s01h_gzmk	ENSFCAP00000013032	s01l_gzmk
s01h_gzmm	-	-
s01h_habp2	ENSFCAP00000010975	s01l_habp2
s01h_hat	ENSFCAP00000012906	s01l_hat
s01h_hatl1	ENSFCAP00000019134	s01l_hatl1
s01h_hatl4	ENSFCAP00000007518	s01l_hatl4
s01h_hatl5	ENSFCAP00000021053	Partial
s01h_hatrp	ENSFCAP00000015385	s01l_hatrp
s01h_hgf	ENSFCAP00000007930	s01l_hgf
s01h_hgfac	ENSFCAP00000011727	s01l_hgfac
s01h_hp	-	-
s01h_hpn	ENSFCAP00000008232	Present
s01h_hpr	-	-
s01h_htra1	ENSFCAP00000003371	Present
s01h_htra2	ENSFCAP00000006637	s01l_htra2
s01h_htra3	ENSFCAP00000014182	s01l_htra3
s01h_htra4	ENSFCAP00000002387	s01l_htra4
s01h_if	ENSFCAP00000000098	s01l_if
s01h_klk1	ENSFCAP00000007656	s01l_klk1
s01h_klk10	ENSFCAP00000022570	s01l_klk10
s01h_klk11	ENSFCAP00000007664	s01l_klk11
s01h_klk12	ENSFCAP00000007666	s01l_klk12
s01h_klk13	Present	s01l_klk13
s01h_klk14	Present	s01l_klk14
s01h_klk15	ENSFCAP00000006034	s01l_klk15
s01h_klk2	-	-
s01h_klk3	-	-
s01h_klk4	ENSFCAP00000007658	s01l_klk4
s01h_klk5	ENSFCAP00000007660	Present
s01h_klk6	ENSFCAP00000007662	s01l_klk6
s01h_klk7	ENSFCAP00000018252	s01l_klk7
s01h_klk8	ENSFCAP00000017487	s01l_klk8
s01h_klk9	ENSFCAP00000015358	s01l_klk9
s01h_klkb1	ENSFCAP00000001438, ENSFCAP00000019782	s01l_klkb1
s01h_klkb2	ENSFCAP00000009800	s01l_klkb2
s01h_klkb4	ENSFCAP00000006127	s01l_klkb4
s01h_klkbl1	ENSFCAP00000009800	s01l_klkb2
s01h_klkbl2	ENSFCAP00000009800	s01l_klkb2
s01h_klkbl4	ENSFCAP00000006127	s01l_klkb4
s01h_lpa	Partial	s01l_lpa
s01h_masp1	ENSFCAP00000010129	s01l_masp1
s01h_masp2	ENSFCAP00000000045	s01l_masp2
s01h_mastin	ENSFCAP00000004294	s01l_mastin
s01h_mpn	ENSFCAP00000003562	s01l_mpn
s01h_mpn2	ENSFCAP00000002158	s01l_mpn2
s01h_msp	ENSFCAP00000018093	Present
s01h_mspl	ENSFCAP00000010917	s01l_mspl
s01h_mst1	-	-
s01h_mtsp1	ENSFCAP00000008809	s01l_mtsp1
s01h_ovch	ENSFCAP00000019648	s01l_ovch
s01h_ovtn	ENSFCAP00000002076	s01l_ovtn
s01h_plat	ENSFCAP00000003246	s01l_plat
s01h_plau	ENSFCAP00000014435, ENSFCAP00000022658	s01l_plau
s01h_plg	ENSFCAP00000021289	Mixedwithlpa
s01h_proc	ENSFCAP00000008800	s01l_proc
s01h_procl	ENSFCAP00000005473	s01l_procl
s01h_proz	-	-
s01h_prsc	ENSFCAP00000005691	s01l_prsc
s01h_prss1	-	-
s01h_prss12	ENSFCAP00000004723	s01l_prss12
s01h_prss2	-	-
s01h_prss21	Present	s01l_prss21
s01h_prss22	Present	s01l_prss22
s01h_prss3	ENSFCAP00000011020	s01l_prss2, s01l_prss1
s01h_prss7	ENSFCAP00000019047	s01l_prss7
s01h_prss7l	ENSFCAP00000011780	s01l_tmprss3
s01h_prss8	ENSFCAP00000002401	s01l_prss8
s01h_prtn3	-	-
s01h_pstl1	ENSFCAP00000002402	s01l_pstl1
s01h_pstl2	ENSFCAP00000016137	s01l_pstl2
s01h_sasp	Present	s01l_sasp
s01h_spuve	ENSFCAP00000024160	s01l_spuve
s01h_spuve2	ENSFCAP00000003514	s01l_spuve2
s01h_tesp2	ENSFCAP00000002158	s01l_mpn2
s01h_tesp3	ENSFCAP00000002158	s01l_mpn2
s01h_tessp1	-	-
s01h_tessp2	ENSFCAP00000014345	s01l_tessp2
s01h_tessp5	Present	s01l_tessp5
s01h_tmprss2	ENSFCAP00000007479	s01l_tmprss2
s01h_tmprss3	ENSFCAP00000011780	s01l_tmprss3
s01h_tmprss4	ENSFCAP00000010920	s01l_tmprss4
s01h_tmprss5	ENSFCAP00000007877	s01l_tmprss5
s01h_tmprss6	ENSFCAP00000007789, ENSFCAP00000017716	s01l_tmprss6
s01h_tmprss7	ENSFCAP00000005307	s01l_tmprss7
s01h_tmprss8	ENSFCAP00000003187	s01l_tmprss8
s01h_tps1	-	-
s01h_tpsb1	ENSFCAP00000004294	s01l_mastin
s01h_tpsb2	ENSFCAP00000004294	s01l_mastin
s01h_tpsd1	-	-
s01h_tpsg1	-	-
s01h_tryx2	ENSFCAP00000006107	s01l_tryx2
s01h_tsp50	ENSFCAP00000016957	s01l_tsp50
s08h_mbtps1	ENSFCAP00000010728	s08l_mbtps1
s08h_pcsk1	ENSFCAP00000005882	s08l_pcsk1
s08h_pcsk2	ENSFCAP00000010550	s08l_pcsk2
s08h_pcsk3	ENSFCAP00000005661	s08l_pcsk3, s08l_pcsk5, s08l_pcsk4
s08h_pcsk4	ENSFCAP00000005661	s08l_pcsk3, s08l_pcsk4
s08h_pcsk5	ENSFCAP00000012414, ENSFCAP00000020230	s08l_pcsk6, s08l_pcsk5
s08h_pcsk6	ENSFCAP00000012414, ENSFCAP00000020230	s08l_pcsk6, s08l_pcsk5
s08h_pcsk7	ENSFCAP00000012594	Present
s08h_pcsk9	-	-
s08h_tpp2	ENSFCAP00000003870	s08l_tpp2
s09h_apeh	ENSFCAP00000018438	s09l_apeh
s09h_bem46l1	ENSFCAP00000014403	s09l_bem46l1
s09h_bem46l2	ENSFCAP00000007806	s09l_bem46l2
s09h_bem46l3	ENSFCAP00000002552	s09l_bem46l3
s09h_cgi67	-	-
s09h_cgi67l1	-	-
s09h_cgi67l2	Present	s09l_cgi67l2
s09h_dpp10	ENSFCAP00000005333	s09l_dpp6, s09l_dpp10
s09h_dpp4	ENSFCAP00000004117, ENSFCAP00000021631	s09l_fap, s09l_dpp4
s09h_dpp6	ENSFCAP00000005333, ENSFCAP00000007763	s09l_dpp10, s09l_dpp6
S09h_dpp8	ENSFCAP00000000569	s09l_prep2
s09h_dpp8	ENSFCAP00000023940, ENSFCAP00000014078	s09l_dpp8, s09l_dpp9
s09h_dpp9	ENSFCAP00000023940, ENSFCAP00000014078	s09l_dpp8, s09l_dpp9
s09h_fap	ENSFCAP00000004117, ENSFCAP00000021631	s09l_fap, s09l_dpp4
s09h_prep	ENSFCAP00000004688, ENSFCAP00000020965	s09l_prep
s09h_prep2	ENSFCAP00000000569	s09l_prep2
s10h_cpvl	ENSFCAP00000010427	s10l_cpvl
s10h_ppgb	ENSFCAP00000001751	s10l_ppgb
s10h_risc	ENSFCAP00000016515	s10l_risc
s12h_lactb	ENSFCAP00000017607	s12l_lactb
s14h_clpp	ENSFCAP00000011605	s14l_clpp
s16h_pim2	ENSFCAP00000004896	s16l_pim2
s16h_prss15	ENSFCAP00000010985	s16l_prss15
s26h_immp1	ENSFCAP00000021086	s26l_immp1
s26h_immp2l	Present	s26l_immp2l
s26h_spc18	ENSFCAP00000021310	s26l_spc18
s26h_spc21	ENSFCAP00000006040	s26l_spc21
s26h_spcl1	Present	s26l_spcl1
s28h_dpp7	ENSFCAP00000007655	s28l_dpp7
s28h_prcp	ENSFCAP00000018686	s28l_prcp
s28h_prss16	ENSFCAP00000017239	s28l_prss16
s33h_abhd4	ENSFCAP00000002802	s33l_abhd4
s33h_cgi58	ENSFCAP00000008226	s33l_cgi58
s33h_ephx1	ENSFCAP00000006461	s33l_ephx1
s33h_ephxrp	ENSFCAP00000001476	s33l_ephxrp
s33h_mest	ENSFCAP00000021225	s33l_mest
s53h_cln2	ENSFCAP00000014271	s53l_cln2
s54h_egfrrs	ENSFCAP00000005062, ENSFCAP00000008448	s54l_egfrrs
s54h_parl	ENSFCAP00000002872	s54l_parl
s54h_rhbdl	ENSFCAP00000013839	s54l_rhbdl
s54h_rhbdl2	-	-
s54h_rhbdl4	ENSFCAP00000014262	s54l_rhbdl4
s54h_rhbdl5	ENSFCAP00000010655	s54l_rhbdl5
s54h_rhbdl6	ENSFCAP00000008448, ENSFCAP00000005062	s54l_rhbdl6
s54h_rhbdl7	ENSFCAP00000021889	s54l_rhbdl7
s59h_nup36	-	-
s59h_nup98	-	-
s60h_ltf	ENSFCAP00000020707, ENSFCAP00000008897, ENSFCAP00000013454	Present
sx1h_reln	ENSFCAP00000000592	sx1l_reln
sx2h_hspca	ENSFCAP00000000755	sx2l_hspca
sx2h_hspcb	ENSFCAP00000009056	sx2l_hspcb
sx2h_tra1	ENSFCAP00000013055	sx2l_tra1
sx2h_trap1	ENSFCAP00000011396	sx2l_trap1
t01h_lmp7l	ENSFCAP00000016868	t01l_lmp7l
t01h_psma1	ENSFCAP00000010575	t01l_psma1
t01h_psma2	ENSFCAP00000023555	t01l_psma2
t01h_psma3	ENSFCAP00000023185	t01l_psma3
t01h_psma4	ENSFCAP00000001782	t01l_psma4
t01h_psma5	ENSFCAP00000016865	t01l_psma5
t01h_psma6	ENSFCAP00000018207	t01l_psma6
t01h_psma7	-	-
t01h_psma8	-	-
t01h_psmb1	ENSFCAP00000022341	t01l_psmb1
t01h_psmb10	ENSFCAP00000011921	t01l_psmb10
t01h_psmb1l	-	-
t01h_psmb2	ENSFCAP00000024477	t01l_psmb2
t01h_psmb3	ENSFCAP00000013447	t01l_psmb3
t01h_psmb4	ENSFCAP00000001722	t01l_psmb4
t01h_psmb5	ENSFCAP00000021075	t01l_psmb5
t01h_psmb6	ENSFCAP00000007446	t01l_psmb6
t01h_psmb7	ENSFCAP00000013513	t01l_psmb7
t01h_psmb8	-	-
t01h_psmb9	-	-
t02h_aga	ENSFCAP00000020093	t02l_aga
t02h_aga3	ENSFCAP00000001694	t02l_aga3
t02h_asrgl1	ENSFCAP00000008208	t02l_asrgl1
t03h_ggt1	ENSFCAP00000001405	t03l_ggt1
t03h_ggt2	-	-
t03h_ggt6	-	-
t03h_ggtl3	ENSFCAP00000002129	t03l_ggtl3
t03h_ggtl4	-	-
t03h_ggtla1	-	-
* Predicted early stop codons. Assembly artifacts cannot be ruled out

## Sheet: S2-Orphan_genes
					Expression levels (rpkm)
gene	length	aromaticity	isoelectric point (IP)	lcr_length	pancreas	testes	kidney	liver	lung	heart	spleen	brain	muscle	stomach
LYPA23A000028	255	0.0470588	10.6536	27	0.252729	3.02834	2.26591	0.135182	0.72173	0.070654	0.950936	0.987581	0	2.17842
LYPA23A000033	121	0.115702	8.9903	21	0	0	0	0	0.103668	0.319681	0	0.198596	0.109768	0
LYPA23A000287	56	0	8.41022	35	0.233093	0	0.197689	0	0	0.228076	0	0.850129	1.40965	0
LYPA23A000579	187	0.0695187	11.2835	31	0.141344	0.068136	0.119875	0	0.201821	0.138302	0.074456	0.386628	0.071232	0
LYPA23A000649	77	0.0519481	8.46039	0	1.01924	0	0	0	0.619299	0	0	0.276824	0	0
LYPA23A000889	75	0.04	5.31171	0	0	0	0	0	0	0	0	0.586177	0	0
LYPA23A000944	72	0.0416667	11.8599	22	0	0	0.30872	0	0	0	0	0	0	0
LYPA23A001014	142	0.0633803	9.75311	130	10.2601	61.6541	54.7519	39.334	38.7021	14.7355	39.6697	31.561	13.215	62.1241
LYPA23A001127	136	0.0441176	9.77448	0	0	0.467501	0.329001	0	0	0.189786	0	0.088426	0.097749	0
LYPA23A001297	61	0.0327869	6.54938	13	0	0	0	0	0	0	0	2.43187	0	0.971784
LYPA23A001330	182	0.032967	8.94159	0	0.09177	0	0	0	0.232954	0	0.064456	0.055784	0	2.04634
LYPA23A001335	179	0.117318	9.92426	0	0.14845	0.286246	0.377708	0	0.353281	0	0	0	0	1.36303
LYPA23A001381	62	0	5.41693	0	0	0	0	0	0	0	0	0.052292	0	0.827485
LYPA23A001694	83	0	10.6086	67	0	0.304988	0.134146	0	0.150565	0	0	0	0.159424	0
LYPA23A001814	96	0.0416667	8.67682	0	0	0.145977	0.417344	0.14173	0.180163	0.111114	0.199398	0.069028	0.114459	0.099301
LYPA23A001816	119	0	10.0976	88	0	0.057787	0.305006	0.074808	0	0.058648	0.063148	0.546511	0	0.07862
LYPA23A001992	85	0	11.4434	23	0	0.893687	0.131027	0	0.735318	0.302334	0	0.422593	0.155717	0.60793
LYPA23A002075	101	0.108911	11.9473	23	0	0.348716	0.245407	0	0.103291	0.212347	0.152426	0.131917	0	0.094886
LYPA23A002128	148	0.0337838	12.037	48	0	0.5	0.251337	0	0.070525	0.144985	0.078054	0.135104	0.149349	0.097178
LYPA23A002225	134	0.0597015	9.02228	9	0	0	0	0	0	0	0	0.469375	0	0
LYPA23A002541	203	0.0394089	11.5864	18	0.065129	1.06746	0.276184	0	0.309987	0.254909	0.137233	0.831376	0	0.256284
LYPA23A002637	89	0	5.49957	70	0.885754	0.426984	1.00163	0	0.702637	0.722242	0.155531	0.673019	0.148796	0
LYPA23A002651	134	0.0597015	9.1673	13	0	0	0	0	0	0	0	0.520673	0	0.074903
LYPA23A002722	55	0.0363636	9.30634	0	0	0	0.804878	0	0	0	0	0	0	0
LYPA23A002800	124	0.00806452	11.3522	110	0.531452	0.409904	0.090146	0	0.10118	0.728019	0	0.193829	5.03526	0.139419
LYPA23A003040	95	0.0736842	8.77826	21	0.08917	9.54266	0	0	4.41388	0	0.375779	0	0	0
LYPA23A003275	57	0.0526316	9.38287	0	0	0	0	0	0	0	0	1.96222	0	0
LYPA23A003477	63	0.0952381	9.89105	0	0	0	0	0	0	0	0	0.567859	0	0
LYPA23A003615	93	0.11828	10.0696	0	0	4.7695	0	0	0	0	0	0	0	0
LYPA23A003684	58	0.0689655	10.2745	5	0	0	0	0	0	0	0	0.410655	0	0
LYPA23A003831	91	0.021978	11.5851	0	2.89973	1.37414	2.41761	0.858765	18.4332	5.338	28.4788	0.537751	0.495375	2.06291
LYPA23A003917	81	0.111111	9.62323	0	0	1.40592	0.274836	0	0.154237	0.792704	0	0.147736	0	0.212528
LYPA23A004072	64	0.046875	6.78107	0	1.83026	0	0	1.01525	0.387167	0.39797	0	0	0	0
LYPA23A004079	72	0.0416667	11.8329	18	0.182004	0.877364	0.771801	0	0.693012	0.712348	2.301	0.663799	0.917236	0.238731
LYPA23A004105	139	0.0791367	8.73505	0	0	1.0876	0	0	0.089487	0	0	0.085715	0	0.123307
LYPA23A004307	63	0.047619	5.10577	10	0	0	0	0	0	0	0	0.378573	0	0
LYPA23A004457	149	0.0134228	4.58368	141	0	0	0.073329	0	0	0	0	0.473011	0	0
LYPA23A004470	62	0.0322581	9.48041	0	0	0.41321	0.181747	0	0.203991	0	0.225771	0.195392	0	0
LYPA23A004488	58	0.103448	9.0191	0	0	0	0.189915	0	0	0.219107	0	0.408348	0	0
LYPA23A004489	92	0.0652174	11.4428	16	0.086088	0.663992	0.073013	0	0.054633	0.224628	0.090698	0.784946	0	0
LYPA23A004554	57	0.0701754	8.98749	0	0	0	0.39308	0	0	0	0	0	0	0.60793
LYPA23A004585	125	0	10.2453	124	0	0	0	0	0.401507	0	0	0	0	0
LYPA23A004808	89	0.011236	4.47479	39	0	0.142328	0	0	0	0	0	0.403811	0	0
LYPA23A004855	90	0	5.27496	87	0	0.563056	0.123827	0	0	0	0	0	0	0
LYPA23A005170	117	0.0598291	10.331	0	0	0	0	0	0	0	0	1.65196	0	0
LYPA23A005286	79	0.0759494	6.51642	0	0	0.484393	0.284074	0.418042	0.318844	0	0.352885	0	0	0
LYPA23A005333	142	0.084507	8.98541	12	0	0.061782	0	0	0	0	0.675134	0.058429	0	0
LYPA23A005552	103	0.0873786	7.9444	0	0	0	0	0	0	0.62302	0	0	0	0
LYPA23A005588	67	0	10.8594	18	0	0	0.16571	0	0.185992	0.382363	0	0.534456	0	0
LYPA23A005707	173	0.0751445	9.54242	0	0.026353	0.076222	0.514057	0	0.037629	0.103143	0.180467	0.036043	0.039843	0.05185
LYPA23A005734	62	0.0967742	7.01422	0	0	0.621638	0	0	0	0	0	0	0	0
LYPA23A005746	82	0.0243902	9.56097	24	0	0	0	0	0	0	0	1.01355	0	0
LYPA23A006007	73	0.0547945	5.04608	0	11.2606	1.55093	0.303183	0	7.82668	10.6684	2.25973	6.51892	0.720627	34.2295
LYPA23A006142	56	0.0892857	12.1763	21	0	0	0	0	0	0	0	0.432655	0	0
LYPA23A006187	116	0.0431034	9.03558	0	0	0	0	0	0	0	0	1.27519	0	0
LYPA23A006200	55	0.0909091	6.62543	27	0.194909	0.187915	0.495915	0	0.092769	0.286071	0.102673	0.088858	0.098227	0.127829
LYPA23A006752	119	0.0504202	5.32184	0	0	0	0	0	3.47805	2.3834	0	0	0.446388	0
LYPA23A006926	66	0.0757576	5.48969	0	0	0	0	0	0	0	0	0.359832	0	0
LYPA23A006998	183	0.00546448	4.76263	138	0.288833	7.24016	1.10233	5.22705	4.19291	0.35327	1.29327	96.6513	0.145561	3.22027
LYPA23A007000	123	0.0650407	10.1893	0	0	0.446473	0	0	0	0	0	1.44769	0	0
LYPA23A007065	227	0.0264317	8.60455	87	0	0	0	0	0	0	0	0.76781	0	0
LYPA23A007318	183	0.0819672	6.16229	0	0	0	0.038901	0	0.218311	0	0.483237	0	0	0
LYPA23A007351	95	0.0105263	5.24139	13	0	0.166357	0.585366	0	0	0.506507	0.090895	0.235994	0	0
LYPA23A007402	94	0.0106383	11.7123	0	0	0	0	0	0	0	0	0.637596	0	0
LYPA23A007774	109	0.00917431	10.029	42	0	0	0.307317	0	0	0	0	0.220261	0	0
LYPA23A007814	70	0.0857143	7.20477	12	0	0	0	0.469312	0	0	0	0.342858	0.189504	0
LYPA23A007856	112	0.0982143	9.4411	0	0	0	0	0	0	0.115047	0.371622	0	0	0
LYPA23A007888	392	0.0331633	11.7601	217	0.033807	0.032594	0.168516	0	0.032182	1.67969	0	0.628944	0	0
LYPA23A007994	54	0.0740741	4.77081	0	0	0.937282	0.206127	0	0	0	0	0.443207	0	0
LYPA23A008276	144	0.0763889	9.64105	0	0	0	0.093384	0.091615	0.034938	0.466863	0	0	0.369935	0
LYPA23A008328	91	0.043956	8.96954	0	0	0	0	0	0	0.714305	0	0	0	0
LYPA23A008649	100	0.07	6.14532	0	0	0	0	0	0	0	0	0	0	0.345096
LYPA23A008682	53	0.0188679	4.34613	0	0	0.530049	0.046627	0	0	0	0	0	0.831206	0
LYPA23A008809	84	0.0238095	12.3436	35	0	0	0	0	0	0	0.16468	0.427565	0	0
LYPA23A008814	92	0.119565	9.83368	0	0	0	0.470238	0	0	0	0	0	0	0
LYPA23A008929	72	0.0694444	5.54669	0	0	0	0	0	0	0	0.575251	0	0	0
LYPA23A009009	126	0.0238095	8.24017	22	0	0	0.52958	0	0	0	0	0.09489	0	0
LYPA23A009133	106	0.0660377	6.62921	28	0	0	0	0	0	0	0	7.4286	0	0
LYPA23A009390	83	0.192771	11.539	12	0.522495	1.33133	0.791312	0.279478	0.781585	0.438214	1.06163	0.782668	0	1.5665
LYPA23A009463	87	0.0689655	10.5311	0	0.309945	0.179293	0.210295	0	2.00629	0	0.065308	0	0.06248	0
LYPA23A009577	68	0.0441176	8.90753	0	0.194434	0.374913	0.164902	0	0	0.190249	0	0	0	0
LYPA23A009712	53	0.0188679	6.82562	0	0	0	0.193909	0	0	0	0	0.069489	1.30588	0
LYPA23A009795	76	0.0921053	7.99896	11	0	0	0	0.212594	0	0	0.538376	0	0	0
LYPA23A010230	155	0.0709677	10.2219	12	0	0	0.699054	0	0.645294	0.674032	0	0.476071	0	0.669906
LYPA23A010233	61	0	3.53265	60	0	0.277864	0.488863	0	0	0	0.212548	0.078835	0	0
LYPA23A010265	77	0.0519481	6.01971	51	0	0	0	0	0	0	0.355876	0.307992	0	0
LYPA23A010337	112	0.133929	8.80743	0	0	0.541724	1.07222	0.13149	0	0.137449	0.184993	0.096061	0.070793	0
LYPA23A010746	58	0.0517241	5.27496	55	0	0	0	0	0	0	0	0.332405	0	0
LYPA23A010766	55	0.109091	4.52826	27	0.22744	1.46909	2.89271	2.621	4.41401	6.2828	6.15815	0.745269	5.25291	1.5122
LYPA23A010840	53	0.0377358	11.4177	0	0	0	0	0	0	0	2.8514	0.448679	0	0.322728
LYPA23A010892	118	0.00847458	10.7259	0	0	0	0	0	0	0	0	0.305403	0	0
LYPA23A010915	174	0.0402299	10.325	29	0.268486	1.42368	1.83114	0.488674	1.38437	0.612983	1.72075	0.89761	1.16139	0.528249
LYPA23A011122	254	0.0472441	9.10797	0	0	0.100467	0.441894	0	0.049598	0.050982	0.16468	0.142522	0	0
LYPA23A011141	311	0.0321543	12.0196	143	0.127753	0.287393	0.216698	0.531486	0.12161	0.250007	0.762699	0.465936	0.171688	0
LYPA23A011145	215	0.0790698	10.1655	0	0	0	0	0.57718	0	0	0.05999	0	0	0
LYPA23A011148	215	0.00465116	2.70087	191	0.05709	2.86394	0.136048	0	0	0	0	0.067645	0	0
LYPA23A011316	170	0.0470588	11.7921	78	0	0.052642	0.092616	0	0	0	0	9.16043	0	0
LYPA23A011354	181	0.0497238	9.5473	22	0.038811	0.187091	0.59249	0	0.849732	0	0.327114	0.070775	0	0.101815
LYPA23A011357	139	0.0143885	3.81158	89	0	0	0	0	0	0	0	0	1.72178	0
LYPA23A011930	162	0.0308642	9.71783	71	0	0.149198	0.572434	0	0.300521	0.41249	0.289466	0.083165	0	0
LYPA23A012101	131	0.0458015	6.4588	43	0.301962	0.097042	0.256097	0	0	0.098487	0	0.091775	0.101452	0.132025
LYPA23A012154	276	0	2.89911	266	0	0.830246	0.121725	0	0	0	0	0	0	0
LYPA23A012241	126	0.047619	10.7852	0	0	0	0	0.261139	0	0	0	0	0	0.411669
LYPA23A012248	54	0.037037	9.48737	0	0	0	0	0	0	0	0	0	0	0.316861
LYPA23A012584	122	0.057377	10.0123	0	0	0	0.45806	0	0	0	0	0.196981	0	0
LYPA23A012602	78	0.0897436	11.1098	10	0.40348	17.1042	3.96118	1.49546	13.0354	0.215343	7.07188	10.0891	0.160207	6.33478
LYPA23A012756	81	0.037037	9.35406	0	0	0	0	0	0	0	0	0.590943	0	0
LYPA23A012817	83	0.0361446	8.81805	0	0.144836	0.335133	0.073702	0.253074	0.303318	0.22675	0	0.052824	0	0
LYPA23A012942	80	0.025	9.29779	0	0	0	0	0	0.312283	0	0	0	0.165329	0
LYPA23A013288	86	0.0348837	10.4228	0	0.306607	1.77363	1.56022	0.574004	0.729661	0.150004	0.969077	0.559123	0	1.20651
LYPA23A013305	101	0.0594059	8.87128	0	0	2.02621	0.054261	0	0	0	0	0	0	0
LYPA23A013367	123	0.0162602	11.3719	14	0	0	1.09637	0.268903	0	0	0	0.098224	0.542905	0.141303
LYPA23A013504	84	0.047619	9.77557	0	0	0.302587	0	0	0	0.307095	0.495984	0.143083	0	0.205835
LYPA23A013759	108	0.0462963	11.527	0	27.5769	95.9179	66.9145	57.3012	135.592	72.9196	65.4907	339.511	85.8607	66.1894
LYPA23A013875	72	0.0555556	4.83905	10	0.182839	0	0.310136	0.456395	0.870238	0.536712	1.54104	0.166711	0.368578	0
LYPA23A013967	65	0.0461538	11.2125	0	0	0	0	0	0	0	0	0	0	0.496741
LYPA23A013982	132	0.0378788	5.51959	89	0	0	0	0	0	0	0	0.546511	0	0
LYPA23A014072	117	0.102564	9.15253	0	0	0	0	0	0	0	0	0.495852	0	0
LYPA23A014155	174	0.045977	9.91522	0	0.05423	0.156851	0.091986	0.067683	0.154867	0.212251	0.057134	0.39557	0	0
LYPA23A014208	163	0.0490798	9.58002	15	0	0.124768	0.603658	0	0	0	0	0.117997	0	0
LYPA23A014369	89	0.11236	5.08026	0	0	0	0	0.896343	0	0	0	0	0	0.036231
LYPA23A014378	93	0.0537634	7.0213	0	0	0	0.239751	0	0	0.414905	0.297825	0	0	0
LYPA23A014761	175	0.0514286	9.15546	37	0	0.457846	0	0	0	0	0.033355	0.028867	0.03191	0.041527
LYPA23A014822	104	0.0384615	10.0854	31	0	0.243991	0.107317	0	0	0.123813	0.399936	0	0	0
LYPA23A014920	264	0.0606061	6.90546	42	0	0	0	0	0	0.490579	0	0.091429	0.960156	0
LYPA23A015121	64	0.015625	9.99921	42	7.56298	9.26226	28.7775	15.3068	15.9553	20.8006	18.7355	38.5795	21.8387	48.7965
LYPA23A015163	176	0.0681818	8.88153	0	0.525447	0.434221	0.381976	0	0.643091	0.293793	0.316334	1.02664	0	0.689217
LYPA23A015214	102	0.0686275	9.48602	27	0	0	0.218802	0	0	0	0	0.352845	0	0
LYPA23A015216	129	0.0232558	4.20709	90	0	0.591208	0.520075	0	0.291864	0	0	0	0	0.134056
LYPA23A015252	89	0.0224719	10.348	0	0.295251	0	0.125203	0	0.281055	0.288897	0	0.538415	0.297592	0.580911
LYPA23A015281	69	0.0289855	8.90692	12	0.465506	0.897601	0.740252	0.435741	0.941636	0.512423	1.71652	0.159166	0.293248	0.152648
LYPA23A015355	112	0.0178571	11.2234	11	10.6133	3.52451	5.50079	0.588723	1.90834	0.807714	11.8029	0.107524	0	4.48573
LYPA23A015528	71	0.028169	10.2707	0	0	0	0	0	0	0	0	0.435767	0	0
LYPA23A015642	121	0.0330579	11.2679	0	0	0.709252	0	0	0	0	0	0	0	0
LYPA23A015760	229	0.0655022	6.91986	208	0.113397	0.6013	0.336606	0.023588	0.449767	0	0.995574	0.017232	0.019049	0.02479
LYPA23A015881	97	0.0515464	11.2416	0	0	0	0	7.48964	0	0	0.594248	0	0.166012	0.112091
LYPA23A015889	90	0.0333333	10.8937	19	0	0	0	0	0	0.118185	0	0	0.852196	0
LYPA23A015905	171	0.0584795	10.0342	23	0.154492	0	0.262053	0	0.588254	0	0.162765	0.211296	0	0.506609
LYPA23A015918	169	0.100592	11.5945	74	0	0.226494	0.265657	0	0.223629	0.153246	0.165003	0.785409	0.157858	0.102715
LYPA23A016121	175	0.0285714	12.2238	27	0	0	0	0	0	0.886387	0	0	0	0
LYPA23A016379	74	0.0540541	10.2359	15	0.150222	0.61151	0.452996	0.041664	0.142999	0.097993	0.175851	0.334818	0.100942	0.065681
LYPA23A016456	80	0.075	11.3892	0	0	0	0.139115	0	0	0	0	0.448679	0	0
LYPA23A016465	62	0.0322581	6.81488	0	0	0	0	0	0.200753	0	0	2.1152	0	0
LYPA23A016518	110	0	3.69366	84	126.639	333.047	253.732	262.954	392.097	35.8502	341.249	93.8306	26.5651	359.017
LYPA23A016592	72	0.0972222	10.7261	0	0	0	1.56504	0	0	0	0.583241	0.336509	0	0.726139
LYPA23A016602	68	0	4.82489	61	1.77322	21.184	7.45407	1.44334	21.1362	6.41216	4.79227	940.7	10.1797	1.31463
LYPA23A016609	61	0	8.23859	40	317.191	91.4365	53.2803	166.367	15.639	14.7053	3.73711	88.3467	767.464	26.4471
LYPA23A016614	61	0	8.3808	41	324.319	320.471	230.243	451.916	104.147	179.192	24.5838	285.777	4788.14	62.0477
LYPA23A016952	165	0.0727273	11.5071	46	0	0.077166	0	0	0	0	0.168648	0.656801	0	0
LYPA23A017013	106	0.0849057	4.79315	0	0	0	0	0	0	0	2.48559	0	0	0
LYPA23A017181	104	0.0961538	5.55963	0	0	0	0	0	0	0	0	0	0	0.331949
LYPA23A017336	190	0.0578947	9.89899	0	0	0.050037	0	0	0	0.457043	0	0	0	0
LYPA23A017408	87	0.045977	11.8056	25	0.051431	0.446267	0.130858	0	0.048958	0.201296	0.162555	0	0	0.202382
LYPA23A017426	70	0.0285714	7.75616	0	0	0	0	0	0	0.366207	0	0	0	0
LYPA23A017433	96	0.0729167	9.19843	21	0.410917	0.132057	0	0	0	0	0	0	0	0
LYPA23A017436	65	0	11.7856	0	0.247187	0.357475	0.419285	0	0	0.3628	0	0.169037	0.37372	0
LYPA23A017468	54	0.0185185	8.73639	0	0	0	0.834688	0	0	0	0.777654	0	0	0
LYPA23A017485	174	0.045977	9.77496	16	0.076067	0	0	0	0	0.074429	0.32056	0.138714	0.07667	0
LYPA23A018140	99	0.040404	12.0032	55	0	0.128095	0.338049	0	0	0	0.139978	0.242287	0.40175	0.174273
LYPA23A018178	71	0.028169	7.71637	29	0	0	0	0	0	0	0	0.507112	0	0
LYPA23A018290	98	0.0612245	9.40729	0	0	0	1.69383	0	0	0	0	0.200969	0	0
LYPA23A018719	79	0.0759494	8.47455	0	0	0	0.140854	0	0.94856	0	0	0.605717	0	0.871367
LYPA23A018788	164	0.0426829	7.66827	0	0.040019	0.077166	0.067881	0	0	0.469892	0	0	0.080673	0
LYPA23A018858	66	0.0757576	5.30219	0	0	0	0	0	0	0	0	0.361622	0	0
LYPA23A019045	122	0.0409836	10.0207	16	0.108019	1.45799	1.83224	0.269632	0.925424	0.951245	0.227606	1.28038	0.653251	3.25877
LYPA23A019060	57	0.0350877	11.9247	0	1.5853	1.31006	18.8232	0.565307	2.15582	2.43757	3.10178	1.44546	0.913067	2.0794
LYPA23A019413	123	0.0569106	10.3791	0	0	0.465801	0	0.150749	0	0	0	0.11013	0	0
LYPA23A019517	284	0.0457746	8.52838	44	0.035844	0.034558	0.1216	0.089473	0.136483	0	0.490929	0.228778	0	0
LYPA23A019649	212	0.0283019	9.29718	25	0	0	0	0	0	0	0	1.1375	0	0
LYPA23A019668	71	0.0704225	4.06134	38	0	0	0.313008	0	0	0	0	0.336509	0	0
LYPA23A019767	49	0.0816327	5.04706	0	0	0.512381	0.676097	0	0	0	0	0	0	1.39419
LYPA23A019835	518	0.0521236	10.7371	175	0	0	0	0	0.392701	0	0	0	0	0
LYPA23A019849	52	0.0192308	6.3924	0	0.352734	0	0	0	0	0	0	0	0.355531	0
LYPA23A019913	58	0.0862069	11.4196	13	0	1.08555	0.572964	0.562114	0.214364	0.88138	0.23725	1.23197	0.226977	1.18151
LYPA23A019941	67	0.0746269	5.67767	0	0	0.57356	0	0	0	0	0	0	0	0
LYPA23A020075	51	0.0392157	10.1613	0	0	0	0.66284	0	0.991958	0.509818	0.548932	1.66275	0	0
LYPA23A020134	64	0.0625	9.65399	0	0	0	0.350309	0	0	0.202078	0	0	0	0
LYPA23A020158	106	0	4.82147	81	0	0	0	0	0	0	0	0.378573	0	0
LYPA23A020171	104	0.0288462	6.18011	0	0	0	0	0	0	0	0	0.346124	0	0.165975
LYPA23A020272	98	0.0612245	9.6181	0	17.5409	1.85812	0.760104	6.38178	0.325796	0	0.532234	1.53304	0.135614	3.63223
LYPA23A020702	61	0.0655738	10.507	0	0	0	0	0	0	1.2581	0	0	0.431989	0
LYPA23A020718	273	0.018315	5.42609	234	0	0	0	0.605195	0	0	0	0	0	0
LYPA23A020727	134	0.0373134	12.2249	55	514.623	7.30617	0	0	0	1.54078	82.6387	0	0.297592	1164.53
LYPA23A021035	69	0.0434783	10.3502	39	8.89236	18.1486	6.53311	6.23868	7.10224	0.837706	7.61459	1.28969	1.74474	23.5954
LYPA23A021162	77	0.012987	6.60248	0	0.077396	0	0	0	0	1.5146	0	0	0.039005	0
LYPA23A021175	72	0.0138889	5.2121	14	0.116547	1.12647	0.911718	0.514419	2.33801	0.840828	2.90246	0.394001	0.369333	0.076436
LYPA23A021479	104	0.0384615	9.90631	0	0	0.121995	0.321951	0	0	0	0.266624	0.230749	0	0
LYPA23A021492	67	0.179104	9.73077	0	0	0.37675	0.49713	0	0.185992	0	0	0.89076	0	0
LYPA23A021521	80	0.0375	9.88507	0	0.382523	0.073759	0	0	0.291304	0.074858	0	0	0	0
LYPA23A021612	214	0.0654206	11.5058	0	0.155851	0.187823	2.84186	0	0.259625	0.228745	0.082098	0.035526	0.314174	0.817705
LYPA23A021834	98	0.0204082	9.68463	0	0.536821	1.1645	0.455284	0	0.383256	0.131317	0.706958	0	0.135269	1.5843
LYPA23A021861	79	0.0759494	6.7951	0	0	0	0.047115	0	0	0	1.08275	0	0	0
LYPA23A022002	82	0.097561	9.30072	0	0.173049	0.556129	0.048922	0	0.274547	1.01595	0	0.052595	1.04652	0
LYPA23A022119	51	0.0392157	9.95404	21	0.255506	0.985347	0.216698	1.27557	1.45932	0.75002	0.269188	0	1.03013	2.34599
LYPA23A022120	114	0.0614035	8.41632	28	0.231738	0.558554	0.19654	0.867681	1.32357	2.60763	0.732442	0.528241	3.15327	0.303965
LYPA23A022132	114	0.0350877	9.79181	16	0.69928	0	0.197689	0.872755	0.443771	0	0	0	0	0.152871
LYPA23A022317	142	0.0915493	6.5036	0	0.557468	1.07492	1.65478	0.115961	0.265331	0.727292	1.07675	0.677725	0.936479	0.487478
LYPA23A022639	87	0.0114943	12.1397	23	2.21471	5.78346	3.33673	4.0831	1.9603	5.73269	2.48025	4.48258	11.3719	3.16638
LYPA23A022645	57	0.0350877	7.71698	0	0	0	0	0.562981	0	0	0	0	0	0
LYPA23A022837	125	0.104	10.6829	0	0	0.71164	1.25203	0	0	0	0	0.288437	0	0
LYPA23A022865	161	0.0434783	10.171	26	0.059983	0	0	0.860935	0	0	0	0.082038	0	0.039339
LYPA23A022926	57	0.105263	9.5163	0	0	0	0	0	0	0	0.488294	0	0	0
LYPA23A022940	115	0.0347826	10.8221	27	0.115199	0	0	0	0	0.338159	0	0.105038	0	0

## Sheet: S3-Chromosomal rearrangement
Fosmid supported chromosomal rearrangements
cat breakpoing coords	lynx breakpoint coords	fosmid support	happened in	Type	comments	Empirically validated?
chrX:121299653, chrX: 123808755	within lp23.s00225:65220-69872	weak	lynx	intrachromosomal	Gap in lynx, corresponding to: chrX:121299653-123808755	yes
chrA1:89934990, chrD4:21523389	within lp23.s00237:50503-52502	yes	lynx	interchromosomal		yes
chrE2:8728442, chrE2:10739143	within lp23.s05401:64744-67893	yes/weak	?	intrachromosomal		no
chrC2:74597169, chrC2:77597169	within lp23.s10737:78469-80793	yes	?	intrachromosomal	Annotated as a gap in cat, crossed by gene LYPA23A010317 in lynx	no
chrA2:51863039, chrC1:152332927	within lp23.s10856:31199-32137	no, but no repeats, good mappability	cat?	interchromosomal		yes
chrB4:72340843, chrB4:72915652	within lp23.s15749:326069-326983	yes	lynx	intrachromosomal		yes
chrC1:21866728, chrC1:21910373	within lp23.s15845:69115-70001	yes	?	intrachromosomal	Complex rearrangement	?
chrA1:184021989, chrA1:174341697	within lp23.s20850:1899562-1909371	yes	cat	intrachromosomal		no
chrD1:8038180, chrB3:109752981	within lp23.s20857:119905-120210	yes	cat	interchromosomal		yes
chrD1:51701, chrA2:167831369	within lp23.s20915:48478-53814	yes	cat	interchromosomal	Complex rearrangement	no
chrE2:10605295, chrE2:11148490	within lp23.s26299:111002-113005	yes	cat	intrachromosomal	Affects gene: LYPA23A006469	no
chrB1:104085575, chrB1:104398572	within lp23.s31299:198248-199109	yes	lynx	intrachromosomal	Inversion + local rearrangement	yes
chrE1:4380477, chrE1:4697195	within lp23.s31503:214020-214429	yes	lynx	intrachromosomal	Gene LYPA23A015536 crosses the breakpoint. Missing region in lynx is at scaffold lp23s00345	yes
chrB1:191984078, chrB1:203274234	within lp23.s36495:2743278-2745170	yes	lynx	intrachromosomal	Inversion + local rearrangement	no
chrB2:44436909, chrF2:76959744	within lp23.s36540:450100-451345	yes	cat	interchromosomal		yes
chrA3:30647520:30831315	lp23.s00001:13000110:13188378	weak	cat	inversion	HAL1MB repeats at both sides of the breakpoint	n.d.
chrD3:3657288:4049932	lp23.s00047:1166335:1577905		lynx	inversion	Scaffold includes whole inversion (~300K)	n.d.
chrD3:4772967:5204199	lp23.s00047:0:433151		lynx	inversion		n.d.
chrC1:177270773:177291475	lp23.s00076:450907:471029		cat	inversion		n.d.
chrA3:13194055:13246779	lp23.s00227:202216:254116	yes	lynx	inversion	regions with many inversions	n.d.
chrC1:29886872:29905546	lp23.s05219:138781:164934	yes	lynx	inversion		n.d.
chrA3:30831789:31586216	lp23.s05233:0:756645	yes	cat	inversion		n.d.
chrB1:70656668:70698496	lp23.s05363:196927:238282	weak	cat	inversion	Scaffold includes whole inversion (~40K)	n.d.
chrE2:10768095:11034929	lp23.s05401:97476:367438	yes	cat	inversion	Affects gene LYPA23A009493T1 ((cone-rod homeobox protein)	n.d.
chrC1:22121921:22258659	lp23.s05431:17195:164254	yes	lynx	inversion		n.d.
chrE2:11108488:11147022	lp23.s05545:78173:117062	yes	cat	inversion		n.d.
chrE2:12331164:12873902	lp23.s10519:0:547535	yes	cat	inversion	Close to genes: LYPA23A021689 and LYPA23A021685	n.d.
chrB3:90538978:90740683	lp23.s10529:346318:547185	weak	cat?	inversion	Scaffold would include whole inversion (~200K)	n.d.
chrD4:1277036:1685838	lp23.s10538:74654:490201	yes	lynx	inversion	Scaffold includes whole inversion (~420K)	n.d.
chrX:14151546:14365952	lp23.s10565:335256:555171	no, but looks good	lynx	inversion		n.d.
chrX:119813814:119836768	lp23.s10576:216701:240847	yes	lynx	inversion	Scaffold includes whole inversion (~35K)	n.d.
chrX:110415273:110465534	lp23.s10783:0:50139	yes	lynx	inversion		n.d.
chrX:78770047:78814941	lp23.s10792:0:42539	yes	cat	inversion		n.d.
chrA1:191124239:194281665	lp23.s15638:0:3169369	no, but crosses a gene	cat	inversion		n.d.
chrB2:3273104:3296006	lp23.s15674:1170642:1194730	yes	cat	inversion	Scaffold includes whole inversion (~24K)	n.d.
chrE3:22426663:23532525	lp23.s15695:495:1109954	yes	lynx	inversion	Gene LYPA23A006780 may have been affected (larger branch in lynx)	n.d.
chrD1:76274512:76303866	lp23.s15708:1174309:1196114	yes	lynx	inversion	Gene saal1-like larger branch in lynx	n.d.
chrE2:51129930:51177583	lp23.s15719:0:47893	yes	lynx	inversion		n.d.
chrC1:22247856:22317544	lp23.s15845:21293:308098	yes	lynx	inversion		n.d.
chrD1:34996283:35135514	lp23.s15903:62078:196374	yes	lynx	inversion	Lots of L1_Fc there	n.d.
chrB3:25533407:25568093	lp23.s20923:4973:38660	weak	lynx	inversion	very weak support	n.d.
chrA1:190811904:191123627	lp23.s21016:128918:432120	yes	cat	inversion		n.d.
chrB2:2028932:2256084	lp23.s21056:2522:227965	yes	lynx	inversion	Breaks gene LYPA23A013640 in its middle	n.d.
chrB1:104085575:104285454	lp23.s31299:0:198248	yes	lynx?	inversion	Close to non-inversion rearrangement	n.d.
chrE1:12709576:12741309	lp23.s31310:15850:49690	weak	cat	inversion		n.d.
chrD3:26519059:26660016	lp23.s31381:357:142366	yes	lynx	inversion	There is also another rearrangement.	n.d.
chrD1:63604572:63815706	lp23.s31494:63861:285712	weak	cat?	inversion	A gene crosses at both sides: LYPA23A015536	n.d.
chrD1:5326864:5478295	lp23.s31526:32369:223457	yes	cat	inversion	In the middle of gene LYPA23A018740, very large branch for lynx and tiger (?)	n.d.
chrB1:192562411:192800619	lp23.s36495:1920622:2165053	yes	cat	inversion	Affects gene LYPA23A018852, larger divergence between lynx and cat. Scaffold includes whole inversion (~240K)	n.d.
chrB3:101223766:101302260	lp23.s36553:1185122:1256792	weak	cat	inversion	Scaffold would include whole inversion (~70K)	n.d.
chrB1:203186005:203273227	lp23.s36736:136460:223271	no, but looks good	lynx	inversion		n.d.
chrX:78743481:78768864	lp23.s36927:0:19003	no, but looks good	lynx	inversion		n.d.

## Sheet: S4-Duplicated_genes
Age of duplication	Enriched GO term	GO description	Duplicated proteins at a given age that have the enriched GO term
2	GO:0030686	90S preribosome	LYPA23A023208P1,LYPA23A011716P1,LYPA23A023216P1,LYPA23A007534P1,LYPA23A001548P1,LYPA23A008320P1,LYPA23A007847P1
2	GO:0000380	alternative nuclear mRNA splicing, via spliceosome	LYPA23A005340P1,LYPA23A007250P1,LYPA23A013200P1,LYPA23A013203P1,LYPA23A003188P1,LYPA23A003455P1
2	GO:0002504	antigen processing and presentation of peptide or polysaccharide antigen via MHC class II	LYPA23A012692P1,LYPA23A006720P1,LYPA23A010098P1,LYPA23A010259P1,LYPA23A010100P1
2	GO:0022627	cytosolic small ribosomal subunit	LYPA23A004328P1,LYPA23A012639P1,LYPA23A004784P1,LYPA23A015426P1,LYPA23A023208P1,LYPA23A021494P1,LYPA23A011716P1,LYPA23A009822P1,LYPA23A023216P1,LYPA23A016660P1,LYPA23A004907P1,LYPA23A007534P1,LYPA23A014531P1,LYPA23A001548P1,LYPA23A008320P1,LYPA23A014351P1,LYPA23A007847P1,LYPA23A018150P1
2	GO:0050911	detection of chemical stimulus involved in sensory perception of smell	LYPA23A005936P1,LYPA23A019093P1,LYPA23A013513P1,LYPA23A010479P1,LYPA23A002271P1,LYPA23A017747P1,LYPA23A022215P1,LYPA23A001593P1,LYPA23A007781P1,LYPA23A009943P1,LYPA23A006396P1,LYPA23A009536P1,LYPA23A018191P1,LYPA23A017245P1,LYPA23A017344P1,LYPA23A019106P1,LYPA23A017283P1,LYPA23A007777P1,LYPA23A004142P1,LYPA23A022194P1,LYPA23A020778P1,LYPA23A010625P1,LYPA23A017366P1,LYPA23A022197P1,LYPA23A008712P1…
2	GO:0015074	DNA integration	LYPA23A020024P1,LYPA23A014925P1,LYPA23A006193P1,LYPA23A004571P1,LYPA23A014728P1,LYPA23A009308P1,LYPA23A016175P1,LYPA23A002899P1,LYPA23A020377P1
2	GO:0006259	DNA metabolic process	LYPA23A020024P1,LYPA23A019306P1,LYPA23A002547P1,LYPA23A004571P1,LYPA23A007958P1,LYPA23A002830P1,LYPA23A012642P1,LYPA23A016657P1,LYPA23A009311P1,LYPA23A014728P1,LYPA23A009307P1,LYPA23A009308P1,LYPA23A012063P1,LYPA23A018199P1,LYPA23A007246P1,LYPA23A017499P1,LYPA23A016172P1,LYPA23A020377P1,LYPA23A020116P1,LYPA23A002142P1
2	GO:0034061	DNA polymerase activity	LYPA23A002547P1,LYPA23A009308P1,LYPA23A012063P1
2	GO:0004519	endonuclease activity	LYPA23A002547P1,LYPA23A002830P1,LYPA23A016657P1,LYPA23A009307P1,LYPA23A009308P1,LYPA23A012063P1,LYPA23A017499P1,LYPA23A020377P1
2	GO:0000447	endonucleolytic cleavage in ITS1 to separate SSU-rRNA from 5.8S rRNA and LSU-rRNA from tricistronic rRNA transcript (SSU-rRNA, 5.8S rRNA, LSU-rRNA)	LYPA23A023208P1,LYPA23A011716P1,LYPA23A023216P1,LYPA23A007534P1,LYPA23A001548P1,LYPA23A008320P1,LYPA23A007847P1
2	GO:0000461	endonucleolytic cleavage to generate mature 3'-end of SSU-rRNA from (SSU-rRNA, 5.8S rRNA, LSU-rRNA)	LYPA23A023208P1,LYPA23A011716P1,LYPA23A023216P1,LYPA23A007534P1,LYPA23A001548P1,LYPA23A008320P1,LYPA23A007847P1
2	GO:0016281	eukaryotic translation initiation factor 4F complex	LYPA23A015141P1,LYPA23A019440P1,LYPA23A008678P1,LYPA23A009328P1,LYPA23A008674P1,LYPA23A022167P1,LYPA23A005299P1,LYPA23A009435P1
2	GO:0004930	G-protein coupled receptor activity	LYPA23A005936P1,LYPA23A019093P1,LYPA23A013513P1,LYPA23A010479P1,LYPA23A002271P1,LYPA23A017747P1,LYPA23A022215P1,LYPA23A001593P1,LYPA23A007781P1,LYPA23A009943P1,LYPA23A006396P1,LYPA23A001848P1,LYPA23A009536P1,LYPA23A018191P1,LYPA23A017245P1,LYPA23A012441P1,LYPA23A017344P1,LYPA23A019106P1,LYPA23A017283P1,LYPA23A007777P1,LYPA23A004142P1,LYPA23A022194P1,LYPA23A020778P1,LYPA23A010625P1,LYPA23A017366P1…
2	GO:0007186	G-protein coupled receptor protein signaling pathway	LYPA23A005936P1,LYPA23A019093P1,LYPA23A013513P1,LYPA23A010479P1,LYPA23A002271P1,LYPA23A017747P1,LYPA23A022215P1,LYPA23A001593P1,LYPA23A007781P1,LYPA23A009943P1,LYPA23A006396P1,LYPA23A008402P1,LYPA23A001848P1,LYPA23A009536P1,LYPA23A018191P1,LYPA23A017245P1,LYPA23A008386P1,LYPA23A012441P1,LYPA23A017344P1,LYPA23A019106P1,LYPA23A017283P1,LYPA23A015366P1,LYPA23A007777P1,LYPA23A004142P1,LYPA23A022194P1…
2	GO:0051028	mRNA transport	LYPA23A005340P1,LYPA23A007250P1,LYPA23A023078P1,LYPA23A005659P1,LYPA23A014083P1,LYPA23A018295P1,LYPA23A013200P1,LYPA23A013203P1,LYPA23A003188P1,LYPA23A001448P1,LYPA23A003455P1
2	GO:0032982	myosin filament	LYPA23A000507P1,LYPA23A007146P1,LYPA23A018375P1,LYPA23A007147P1,LYPA23A013700P1
2	GO:0051170	nuclear import	LYPA23A005340P1,LYPA23A006992P1,LYPA23A023078P1,LYPA23A005659P1,LYPA23A018295P1,LYPA23A013200P1,LYPA23A013203P1,LYPA23A003188P1,LYPA23A001448P1,LYPA23A003455P1
2	GO:0000184	nuclear-transcribed mRNA catabolic process, nonsense-mediated decay	LYPA23A000694P1,LYPA23A004328P1,LYPA23A012639P1,LYPA23A021575P1,LYPA23A004784P1,LYPA23A015426P1,LYPA23A006202P1,LYPA23A023208P1,LYPA23A021494P1,LYPA23A011716P1,LYPA23A022882P1,LYPA23A002779P1,LYPA23A023216P1,LYPA23A016660P1,LYPA23A012569P1,LYPA23A007534P1,LYPA23A019741P1,LYPA23A014531P1,LYPA23A001548P1,LYPA23A005175P1,LYPA23A007847P1,LYPA23A018150P1
2	GO:0004518	nuclease activity	LYPA23A020024P1,LYPA23A019306P1,LYPA23A004571P1,LYPA23A007958P1,LYPA23A012642P1,LYPA23A009311P1,LYPA23A014728P1,LYPA23A018199P1,LYPA23A007246P1,LYPA23A016172P1,LYPA23A020116P1,LYPA23A002142P1
2	GO:0003676	nucleic acid binding	LYPA23A012785P1,LYPA23A020024P1,LYPA23A014925P1,LYPA23A019306P1,LYPA23A002547P1,LYPA23A006193P1,LYPA23A015141P1,LYPA23A004571P1,LYPA23A014054P1,LYPA23A008123P1,LYPA23A007958P1,LYPA23A002830P1,LYPA23A015436P1,LYPA23A014729P1,LYPA23A003075P1,LYPA23A011758P1,LYPA23A012642P1,LYPA23A019478P1,LYPA23A023078P1,LYPA23A014775P1,LYPA23A006270P1,LYPA23A017570P1,LYPA23A016657P1,LYPA23A019440P1,LYPA23A009311P1…
2	GO:0006334	nucleosome assembly	LYPA23A002828P1,LYPA23A010318P1,LYPA23A002844P1,LYPA23A002833P1,LYPA23A009669P1,LYPA23A002806P1,LYPA23A002841P1,LYPA23A020471P1,LYPA23A006027P1,LYPA23A002804P1,LYPA23A002798P1,LYPA23A002827P1,LYPA23A002839P1,LYPA23A002851P1
2	GO:0016779	nucleotidyltransferase activity	LYPA23A020024P1,LYPA23A019306P1,LYPA23A004571P1,LYPA23A007958P1,LYPA23A002830P1,LYPA23A016657P1,LYPA23A009307P1,LYPA23A017499P1,LYPA23A020377P1,LYPA23A020116P1
2	GO:0004984	olfactory receptor activity	LYPA23A005936P1,LYPA23A019093P1,LYPA23A013513P1,LYPA23A010479P1,LYPA23A002271P1,LYPA23A017747P1,LYPA23A022215P1,LYPA23A001593P1,LYPA23A007781P1,LYPA23A009943P1,LYPA23A006396P1,LYPA23A008402P1,LYPA23A001848P1,LYPA23A009536P1,LYPA23A018191P1,LYPA23A017245P1,LYPA23A008386P1,LYPA23A012441P1,LYPA23A017344P1,LYPA23A019106P1,LYPA23A017283P1,LYPA23A007777P1,LYPA23A004142P1,LYPA23A022194P1,LYPA23A020778P1…
2	GO:0008233	peptidase activity	LYPA23A002547P1,LYPA23A006193P1,LYPA23A002830P1,LYPA23A016657P1,LYPA23A009307P1,LYPA23A012063P1,LYPA23A014786P1,LYPA23A005197P1,LYPA23A016469P1,LYPA23A000527P1,LYPA23A017499P1,LYPA23A020377P1,LYPA23A019274P1
2	GO:0016503	pheromone receptor activity	LYPA23A015366P1,LYPA23A005539P1,LYPA23A012922P1,LYPA23A002814P1,LYPA23A002786P1,LYPA23A016461P1
2	GO:0005886	plasma membrane	LYPA23A005936P1,LYPA23A019093P1,LYPA23A013513P1,LYPA23A010479P1,LYPA23A002271P1,LYPA23A017747P1,LYPA23A022215P1,LYPA23A001593P1,LYPA23A007781P1,LYPA23A009943P1,LYPA23A006396P1,LYPA23A001848P1,LYPA23A014074P1,LYPA23A009536P1,LYPA23A018191P1,LYPA23A002076P1,LYPA23A017245P1,LYPA23A017316P1,LYPA23A012441P1,LYPA23A003093P1,LYPA23A017344P1,LYPA23A012455P1,LYPA23A019106P1,LYPA23A023208P1,LYPA23A001991P1…
2	GO:0004523	ribonuclease H activity	LYPA23A014925P1,LYPA23A006193P1,LYPA23A008123P1,LYPA23A007958P1,LYPA23A002830P1,LYPA23A011758P1,LYPA23A012642P1,LYPA23A019478P1,LYPA23A017570P1,LYPA23A009311P1,LYPA23A014728P1,LYPA23A009307P1,LYPA23A016175P1,LYPA23A018199P1,LYPA23A007246P1,LYPA23A003724P1,LYPA23A017499P1,LYPA23A020116P1,LYPA23A002142P1
2	GO:0000028	ribosomal small subunit assembly	LYPA23A004784P1,LYPA23A023208P1,LYPA23A021494P1,LYPA23A011716P1,LYPA23A023216P1,LYPA23A004907P1,LYPA23A007534P1,LYPA23A014531P1,LYPA23A001548P1,LYPA23A008320P1,LYPA23A014351P1,LYPA23A007847P1
2	GO:0000339	RNA cap binding	LYPA23A015141P1,LYPA23A019440P1,LYPA23A009328P1,LYPA23A022167P1,LYPA23A005299P1,LYPA23A009435P1
2	GO:0006405	RNA export from nucleus	LYPA23A005340P1,LYPA23A006992P1,LYPA23A023078P1,LYPA23A005659P1,LYPA23A018295P1,LYPA23A013203P1,LYPA23A003188P1,LYPA23A001448P1,LYPA23A003455P1
2	GO:0006278	RNA-dependent DNA replication	LYPA23A014925P1,LYPA23A006193P1,LYPA23A023059P1,LYPA23A016175P1,LYPA23A010261P1,LYPA23A015669P1
2	GO:0003964	RNA-directed DNA polymerase activity	LYPA23A014925P1,LYPA23A006193P1,LYPA23A023059P1,LYPA23A016175P1,LYPA23A010261P1
2	GO:0006407	rRNA export from nucleus	LYPA23A023208P1,LYPA23A011716P1,LYPA23A023216P1,LYPA23A007534P1,LYPA23A001548P1,LYPA23A008320P1,LYPA23A007847P1
2	GO:0051320	S phase	LYPA23A002844P1,LYPA23A002806P1,LYPA23A002841P1,LYPA23A002798P1,LYPA23A002839P1
2	GO:0003727	single-stranded RNA binding	LYPA23A005340P1,LYPA23A006992P1,LYPA23A023078P1,LYPA23A005659P1,LYPA23A018295P1,LYPA23A013203P1,LYPA23A003188P1,LYPA23A001448P1,LYPA23A017310P1,LYPA23A003455P1,LYPA23A003099P1
2	GO:0015935	small ribosomal subunit	LYPA23A002420P1,LYPA23A023208P1,LYPA23A011716P1,LYPA23A023216P1,LYPA23A003494P1,LYPA23A001548P1,LYPA23A008320P1,LYPA23A001664P1,LYPA23A007847P1
2	GO:0006614	SRP-dependent cotranslational protein targeting to membrane	LYPA23A000694P1,LYPA23A004328P1,LYPA23A012639P1,LYPA23A021575P1,LYPA23A004784P1,LYPA23A015426P1,LYPA23A006202P1,LYPA23A023208P1,LYPA23A021494P1,LYPA23A011716P1,LYPA23A022882P1,LYPA23A002779P1,LYPA23A023216P1,LYPA23A016660P1,LYPA23A012569P1,LYPA23A007534P1,LYPA23A019741P1,LYPA23A014531P1,LYPA23A001548P1,LYPA23A005175P1,LYPA23A007847P1,LYPA23A018150P1
2	GO:0003735	structural constituent of ribosome	LYPA23A000694P1,LYPA23A022319P1,LYPA23A004328P1,LYPA23A012639P1,LYPA23A021575P1,LYPA23A010389P1,LYPA23A004784P1,LYPA23A015426P1,LYPA23A018518P1,LYPA23A006202P1,LYPA23A002420P1,LYPA23A023208P1,LYPA23A021494P1,LYPA23A011716P1,LYPA23A022882P1,LYPA23A002779P1,LYPA23A020895P1,LYPA23A009822P1,LYPA23A003042P1,LYPA23A023216P1,LYPA23A004570P1,LYPA23A016660P1,LYPA23A003494P1,LYPA23A004907P1,LYPA23A012569P1…
2	GO:0006414	translational elongation	LYPA23A017250P1,LYPA23A000694P1,LYPA23A004328P1,LYPA23A012639P1,LYPA23A021575P1,LYPA23A004784P1,LYPA23A017316P1,LYPA23A015426P1,LYPA23A006202P1,LYPA23A023208P1,LYPA23A021494P1,LYPA23A011716P1,LYPA23A022882P1,LYPA23A002779P1,LYPA23A023216P1,LYPA23A016660P1,LYPA23A012569P1,LYPA23A007534P1,LYPA23A019741P1,LYPA23A014531P1,LYPA23A001548P1,LYPA23A011869P1,LYPA23A008060P1,LYPA23A005175P1,LYPA23A007847P1…
2	GO:0006413	translational initiation	LYPA23A000694P1,LYPA23A004328P1,LYPA23A012639P1,LYPA23A015141P1,LYPA23A021575P1,LYPA23A004784P1,LYPA23A015426P1,LYPA23A006202P1,LYPA23A023208P1,LYPA23A021494P1,LYPA23A011716P1,LYPA23A022882P1,LYPA23A002779P1,LYPA23A023216P1,LYPA23A009328P1,LYPA23A016660P1,LYPA23A022167P1,LYPA23A005299P1,LYPA23A012569P1,LYPA23A007534P1,LYPA23A019741P1,LYPA23A014531P1,LYPA23A001548P1,LYPA23A005175P1,LYPA23A009435P1…
2	GO:0006415	translational termination	LYPA23A000694P1,LYPA23A004328P1,LYPA23A012639P1,LYPA23A021575P1,LYPA23A004784P1,LYPA23A015426P1,LYPA23A006202P1,LYPA23A023208P1,LYPA23A021494P1,LYPA23A011716P1,LYPA23A022882P1,LYPA23A002779P1,LYPA23A023216P1,LYPA23A016660P1,LYPA23A012569P1,LYPA23A007534P1,LYPA23A019741P1,LYPA23A014531P1,LYPA23A001548P1,LYPA23A005175P1,LYPA23A007847P1,LYPA23A018150P1
3	GO:0019882	antigen processing and presentation	LYPA23A010267P1,LYPA23A008266P1,LYPA23A012498P1,LYPA23A010266P1,LYPA23A012055P1,LYPA23A006453P1
3	GO:0044262	cellular carbohydrate metabolic process	LYPA23A008315P1,LYPA23A001909P1,LYPA23A001207P1,LYPA23A016995P1,LYPA23A001037P1,LYPA23A005136P1,LYPA23A004514P1,LYPA23A006353P1,LYPA23A006362P1,LYPA23A020879P1
3	GO:0015074	DNA integration	LYPA23A014925P1,LYPA23A004571P1,LYPA23A021595P1,LYPA23A014728P1,LYPA23A016175P1,LYPA23A002899P1
3	GO:0006259	DNA metabolic process	LYPA23A019306P1,LYPA23A004571P1,LYPA23A007958P1,LYPA23A002830P1,LYPA23A017569P1,LYPA23A012642P1,LYPA23A009311P1,LYPA23A014728P1,LYPA23A009307P1,LYPA23A012063P1,LYPA23A018199P1,LYPA23A007246P1,LYPA23A017499P1,LYPA23A020116P1,LYPA23A002142P1
3	GO:0004459	L-lactate dehydrogenase activity	LYPA23A008315P1,LYPA23A001909P1,LYPA23A001207P1,LYPA23A016995P1,LYPA23A001037P1,LYPA23A005136P1,LYPA23A004514P1,LYPA23A006353P1,LYPA23A006362P1,LYPA23A020879P1
3	GO:0006089	lactate metabolic process	LYPA23A001909P1,LYPA23A001207P1,LYPA23A001037P1,LYPA23A004514P1
3	GO:0004518	nuclease activity	LYPA23A019306P1,LYPA23A004571P1,LYPA23A007958P1,LYPA23A012642P1,LYPA23A009311P1,LYPA23A014728P1,LYPA23A018199P1,LYPA23A007246P1,LYPA23A020116P1,LYPA23A002142P1
3	GO:0003676	nucleic acid binding	LYPA23A014925P1,LYPA23A019306P1,LYPA23A004571P1,LYPA23A021595P1,LYPA23A007958P1,LYPA23A019954P1,LYPA23A002830P1,LYPA23A017569P1,LYPA23A014729P1,LYPA23A011758P1,LYPA23A012642P1,LYPA23A019478P1,LYPA23A014775P1,LYPA23A017570P1,LYPA23A009311P1,LYPA23A008113P1,LYPA23A014728P1,LYPA23A009307P1,LYPA23A012063P1,LYPA23A017763P1,LYPA23A018199P1,LYPA23A007048P1,LYPA23A007246P1,LYPA23A018031P1,LYPA23A003724P1…
3	GO:0016779	nucleotidyltransferase activity	LYPA23A019306P1,LYPA23A004571P1,LYPA23A007958P1,LYPA23A002830P1,LYPA23A017569P1,LYPA23A009307P1,LYPA23A017499P1,LYPA23A020116P1
3	GO:0004984	olfactory receptor activity	LYPA23A005936P1,LYPA23A010479P1,LYPA23A017747P1,LYPA23A000609P1,LYPA23A005068P1,LYPA23A000521P1,LYPA23A013617P1,LYPA23A020788P1,LYPA23A002809P1,LYPA23A001463P1,LYPA23A005065P1,LYPA23A012442P1,LYPA23A012440P1,LYPA23A019888P1,LYPA23A000611P1,LYPA23A003424P1,LYPA23A003431P1,LYPA23A010194P1,LYPA23A020783P1,LYPA23A011925P1
3	GO:0016616	oxidoreductase activity, acting on the CH-OH group of donors, NAD or NADP as acceptor	LYPA23A008315P1,LYPA23A001909P1,LYPA23A001207P1,LYPA23A016995P1,LYPA23A001037P1,LYPA23A005136P1,LYPA23A004514P1,LYPA23A006353P1,LYPA23A006362P1,LYPA23A020879P1
3	GO:0016503	pheromone receptor activity	LYPA23A005557P1,LYPA23A005567P1,LYPA23A005550P1,LYPA23A005549P1,LYPA23A005569P1
3	GO:0006090	pyruvate metabolic process	LYPA23A008315P1,LYPA23A001909P1,LYPA23A016995P1,LYPA23A001037P1,LYPA23A004514P1,LYPA23A020879P1
3	GO:0009408	response to heat	LYPA23A006957P1,LYPA23A012578P1,LYPA23A001423P1,LYPA23A014087P1,LYPA23A003213P1,LYPA23A021059P1
3	GO:0004523	ribonuclease H activity	LYPA23A014925P1,LYPA23A007958P1,LYPA23A002830P1,LYPA23A011758P1,LYPA23A012642P1,LYPA23A019478P1,LYPA23A017570P1,LYPA23A009311P1,LYPA23A014728P1,LYPA23A009307P1,LYPA23A016175P1,LYPA23A018199P1,LYPA23A007246P1,LYPA23A003724P1,LYPA23A017499P1,LYPA23A020116P1,LYPA23A002142P1
4	GO:0032440	2-alkenal reductase activity	LYPA23A008503P1,LYPA23A000493P1,LYPA23A020198P1
4	GO:0030686	90S preribosome	LYPA23A001744P1,LYPA23A011716P1,LYPA23A007534P1,LYPA23A001548P1,LYPA23A009347P1,LYPA23A008320P1,LYPA23A012355P1,LYPA23A007847P1
4	GO:0000380	alternative nuclear mRNA splicing, via spliceosome	LYPA23A022451P1,LYPA23A012529P1,LYPA23A013330P1,LYPA23A019533P1,LYPA23A000890P1,LYPA23A021210P1,LYPA23A000891P1,LYPA23A012087P1
4	GO:0019882	antigen processing and presentation	LYPA23A010267P1,LYPA23A008887P2,LYPA23A010097P1,LYPA23A008266P1,LYPA23A016174P1,LYPA23A016205P1,LYPA23A012497P2,LYPA23A016178P1,LYPA23A006720P1,LYPA23A012498P1,LYPA23A010266P1,LYPA23A012055P1,LYPA23A018755P1,LYPA23A010098P1,LYPA23A006453P1,LYPA23A016732P1,LYPA23A019891P1
4	GO:0002504	antigen processing and presentation of peptide or polysaccharide antigen via MHC class II	LYPA23A012692P1,LYPA23A010097P1,LYPA23A016205P1,LYPA23A006720P1,LYPA23A010098P1,LYPA23A010259P1,LYPA23A010100P1,LYPA23A016732P1
4	GO:0005881	cytoplasmic microtubule	LYPA23A001498P1,LYPA23A017028P1,LYPA23A015402P1,LYPA23A003446P1,LYPA23A003381P1,LYPA23A014541P1,LYPA23A000100P1,LYPA23A014558P1,LYPA23A003241P1,LYPA23A011656P1,LYPA23A010953P1,LYPA23A011008P1,LYPA23A016434P1,LYPA23A017026P1,LYPA23A016368P1,LYPA23A014546P1,LYPA23A000327P1,LYPA23A000066P1
4	GO:0022625	cytosolic large ribosomal subunit	LYPA23A010617P1,LYPA23A008445P1,LYPA23A007265P1,LYPA23A011825P1,LYPA23A015091P1,LYPA23A000032P1,LYPA23A012127P1,LYPA23A021575P1,LYPA23A000538P1,LYPA23A006289P1,LYPA23A009768P1,LYPA23A011047P1,LYPA23A021648P1,LYPA23A022882P1,LYPA23A018640P1,LYPA23A017236P1,LYPA23A019215P1,LYPA23A008830P1,LYPA23A004245P1,LYPA23A011563P1,LYPA23A020451P1,LYPA23A000262P1,LYPA23A013420P1,LYPA23A021901P3,LYPA23A002478P1…
4	GO:0022627	cytosolic small ribosomal subunit	LYPA23A001744P1,LYPA23A003338P1,LYPA23A011663P1,LYPA23A006941P1,LYPA23A017083P1,LYPA23A006277P1,LYPA23A012639P1,LYPA23A005348P1,LYPA23A011716P1,LYPA23A011299P1,LYPA23A005081P1,LYPA23A015530P1,LYPA23A015540P1,LYPA23A015082P1,LYPA23A016660P1,LYPA23A020974P1,LYPA23A015518P1,LYPA23A014315P1,LYPA23A001429P1,LYPA23A004907P1,LYPA23A007534P1,LYPA23A000821P1,LYPA23A001548P1,LYPA23A009347P1,LYPA23A000329P1…
4	GO:0042742	defense response to bacterium	LYPA23A002826P1,LYPA23A009341P1,LYPA23A002791P1,LYPA23A002846P1,LYPA23A002831P1,LYPA23A002803P1,LYPA23A002850P1,LYPA23A002837P1,LYPA23A002801P1,LYPA23A002824P1,LYPA23A002845P1,LYPA23A002787P1
4	GO:0050911	detection of chemical stimulus involved in sensory perception of smell	LYPA23A019664P1,LYPA23A005936P1,LYPA23A019109P1,LYPA23A017484P1,LYPA23A014968P1,LYPA23A007517P1,LYPA23A003652P1,LYPA23A012071P1,LYPA23A009947P1,LYPA23A021540P1,LYPA23A013513P1,LYPA23A017361P1,LYPA23A005330P1,LYPA23A010479P1,LYPA23A003651P1,LYPA23A020803P1,LYPA23A002271P1,LYPA23A009964P1,LYPA23A016662P1,LYPA23A017747P1,LYPA23A002703P1,LYPA23A019346P1,LYPA23A020218P1,LYPA23A013417P1,LYPA23A002102P1…
4	GO:0022900	electron transport chain	LYPA23A007223P1,LYPA23A013321P1,LYPA23A011402P1,LYPA23A001715P1,LYPA23A005396P1,LYPA23A006077P1,LYPA23A008547P1,LYPA23A017519P1,LYPA23A001526P1,LYPA23A016560P2,LYPA23A001454P1,LYPA23A009015P1,LYPA23A017125P1
4	GO:0000447	endonucleolytic cleavage in ITS1 to separate SSU-rRNA from 5.8S rRNA and LSU-rRNA from tricistronic rRNA transcript (SSU-rRNA, 5.8S rRNA, LSU-rRNA)	LYPA23A001744P1,LYPA23A011716P1,LYPA23A007534P1,LYPA23A001548P1,LYPA23A009347P1,LYPA23A008320P1,LYPA23A012355P1,LYPA23A007847P1
4	GO:0000461	endonucleolytic cleavage to generate mature 3'-end of SSU-rRNA from (SSU-rRNA, 5.8S rRNA, LSU-rRNA)	LYPA23A001744P1,LYPA23A011716P1,LYPA23A007534P1,LYPA23A001548P1,LYPA23A009347P1,LYPA23A008320P1,LYPA23A012355P1,LYPA23A007847P1
4	GO:0034101	erythrocyte homeostasis	LYPA23A017083P1,LYPA23A005348P1,LYPA23A011299P1,LYPA23A015518P1,LYPA23A014315P1,LYPA23A018018P1,LYPA23A008302P1
4	GO:0005853	eukaryotic translation elongation factor 1 complex	LYPA23A001970P1,LYPA23A010134P1,LYPA23A017316P1,LYPA23A009837P1,LYPA23A003254P1,LYPA23A019980P1,LYPA23A016949P1,LYPA23A000692P1,LYPA23A011869P1,LYPA23A008060P1,LYPA23A006520P1,LYPA23A012104P1,LYPA23A005525P1,LYPA23A016909P1
4	GO:0004930	G-protein coupled receptor activity	LYPA23A019664P1,LYPA23A005936P1,LYPA23A019109P1,LYPA23A017484P1,LYPA23A014968P1,LYPA23A007517P1,LYPA23A003652P1,LYPA23A012071P1,LYPA23A009947P1,LYPA23A002617P1,LYPA23A021540P1,LYPA23A013513P1,LYPA23A017361P1,LYPA23A005330P1,LYPA23A010479P1,LYPA23A003651P1,LYPA23A020803P1,LYPA23A002271P1,LYPA23A009964P1,LYPA23A016662P1,LYPA23A017747P1,LYPA23A002703P1,LYPA23A019346P1,LYPA23A020218P1,LYPA23A013417P1…
4	GO:0007186	G-protein coupled receptor protein signaling pathway	LYPA23A019664P1,LYPA23A005936P1,LYPA23A019109P1,LYPA23A017484P1,LYPA23A014968P1,LYPA23A007517P1,LYPA23A003652P1,LYPA23A012071P1,LYPA23A009947P1,LYPA23A002617P1,LYPA23A021540P1,LYPA23A013513P1,LYPA23A017361P1,LYPA23A005330P1,LYPA23A010479P1,LYPA23A003651P1,LYPA23A020803P1,LYPA23A002271P1,LYPA23A009964P1,LYPA23A016662P1,LYPA23A017747P1,LYPA23A002703P1,LYPA23A019346P1,LYPA23A020218P1,LYPA23A013417P1…
4	GO:0010467	gene expression	LYPA23A016415P1,LYPA23A004124P1,LYPA23A008570P1,LYPA23A021905P1,LYPA23A000537P1,LYPA23A018090P1,LYPA23A014786P1,LYPA23A022409P1,LYPA23A016469P1,LYPA23A016873P1,LYPA23A022278P1
4	GO:0004365	glyceraldehyde-3-phosphate dehydrogenase (phosphorylating) activity	LYPA23A008953P1,LYPA23A023245P1,LYPA23A001321P1,LYPA23A021127P1,LYPA23A022025P1,LYPA23A004749P1,LYPA23A012585P1,LYPA23A014944P1,LYPA23A007372P1,LYPA23A018275P1,LYPA23A011131P1,LYPA23A000839P1,LYPA23A011864P1,LYPA23A018656P1,LYPA23A017158P1,LYPA23A005800P1,LYPA23A002265P1,LYPA23A022989P1,LYPA23A004391P1
4	GO:0005525	GTP binding	LYPA23A009976P1,LYPA23A001498P1,LYPA23A017028P1,LYPA23A014441P1,LYPA23A017250P1,LYPA23A021468P1,LYPA23A000017P1,LYPA23A015402P1,LYPA23A003277P1,LYPA23A009050P1,LYPA23A010134P1,LYPA23A019947P1,LYPA23A017316P1,LYPA23A014541P1,LYPA23A002606P1,LYPA23A009837P1,LYPA23A017895P1,LYPA23A014558P1,LYPA23A014287P1,LYPA23A008350P1,LYPA23A000403P1,LYPA23A004906P1,LYPA23A006919P1,LYPA23A003241P1,LYPA23A011656P1…
4	GO:0006184	GTP catabolic process	LYPA23A001498P1,LYPA23A017028P1,LYPA23A014441P1,LYPA23A017250P1,LYPA23A000017P1,LYPA23A015402P1,LYPA23A003277P1,LYPA23A010134P1,LYPA23A019947P1,LYPA23A014541P1,LYPA23A002606P1,LYPA23A009837P1,LYPA23A014558P1,LYPA23A000403P1,LYPA23A004906P1,LYPA23A006919P1,LYPA23A003241P1,LYPA23A011656P1,LYPA23A010953P1,LYPA23A006756P1,LYPA23A011008P1,LYPA23A022209P1,LYPA23A021021P1,LYPA23A003254P1,LYPA23A019980P1…
4	GO:0003924	GTPase activity	LYPA23A001498P1,LYPA23A017028P1,LYPA23A014441P1,LYPA23A017250P1,LYPA23A000017P1,LYPA23A015402P1,LYPA23A003277P1,LYPA23A010134P1,LYPA23A019947P1,LYPA23A014541P1,LYPA23A002606P1,LYPA23A009837P1,LYPA23A014558P1,LYPA23A000403P1,LYPA23A004906P1,LYPA23A006919P1,LYPA23A003241P1,LYPA23A011656P1,LYPA23A010953P1,LYPA23A006756P1,LYPA23A011008P1,LYPA23A022209P1,LYPA23A021021P1,LYPA23A003254P1,LYPA23A019980P1…
4	GO:0005833	hemoglobin complex	LYPA23A004474P1,LYPA23A001566P1,LYPA23A004475P1,LYPA23A004476P1,LYPA23A004473P1,LYPA23A019877P1
4	GO:0002553	histamine secretion by mast cell	LYPA23A016415P1,LYPA23A021905P1,LYPA23A016873P1
4	GO:0006955	immune response	LYPA23A010267P1,LYPA23A012692P1,LYPA23A008887P2,LYPA23A010097P1,LYPA23A008266P1,LYPA23A007412P1,LYPA23A019475P1,LYPA23A016174P1,LYPA23A016205P1,LYPA23A012497P2,LYPA23A016178P1,LYPA23A006720P1,LYPA23A012498P1,LYPA23A010266P1,LYPA23A018800P1,LYPA23A012055P1,LYPA23A019477P1,LYPA23A018755P1,LYPA23A010098P1,LYPA23A010259P1,LYPA23A010100P1,LYPA23A006453P1,LYPA23A016176P1,LYPA23A016732P1,LYPA23A019891P1
4	GO:0016021	integral to membrane	LYPA23A019664P1,LYPA23A005936P1,LYPA23A019109P1,LYPA23A017484P1,LYPA23A014968P1,LYPA23A007517P1,LYPA23A010267P1,LYPA23A003652P1,LYPA23A012692P1,LYPA23A012071P1,LYPA23A009947P1,LYPA23A002617P1,LYPA23A021540P1,LYPA23A013513P1,LYPA23A017361P1,LYPA23A005330P1,LYPA23A010479P1,LYPA23A003651P1,LYPA23A020803P1,LYPA23A002271P1,LYPA23A009964P1,LYPA23A016662P1,LYPA23A017747P1,LYPA23A002703P1,LYPA23A019346P1…
4	GO:0045095	keratin filament	LYPA23A007568P1,LYPA23A000968P1,LYPA23A007594P1,LYPA23A000963P1,LYPA23A000957P1,LYPA23A000986P1,LYPA23A017139P1,LYPA23A017148P1,LYPA23A007238P1,LYPA23A000952P2,LYPA23A007596P1,LYPA23A007577P1,LYPA23A020767P1,LYPA23A007586P1
4	GO:0000462	maturation of SSU-rRNA from tricistronic rRNA transcript (SSU-rRNA, 5.8S rRNA, LSU-rRNA)	LYPA23A017083P1,LYPA23A005348P1,LYPA23A011299P1,LYPA23A020974P1,LYPA23A015518P1,LYPA23A014315P1,LYPA23A018018P1,LYPA23A008302P1,LYPA23A018393P1
4	GO:0042612	MHC class I protein complex	LYPA23A010267P1,LYPA23A008887P2,LYPA23A008266P1,LYPA23A016174P1,LYPA23A016178P1,LYPA23A010266P1,LYPA23A012055P1,LYPA23A018755P1,LYPA23A016176P1
4	GO:0042613	MHC class II protein complex	LYPA23A012692P1,LYPA23A010097P1,LYPA23A016205P1,LYPA23A006720P1,LYPA23A010098P1,LYPA23A010259P1,LYPA23A010100P1,LYPA23A016732P1
4	GO:0000226	microtubule cytoskeleton organization	LYPA23A019907P1,LYPA23A017280P1,LYPA23A008953P1,LYPA23A001321P1,LYPA23A021127P1,LYPA23A022025P1,LYPA23A014944P1,LYPA23A007372P1,LYPA23A018275P1,LYPA23A011008P1,LYPA23A011131P1,LYPA23A000839P1,LYPA23A011864P1,LYPA23A018656P1,LYPA23A017158P1,LYPA23A005800P1,LYPA23A022989P1,LYPA23A013447P1,LYPA23A000066P1,LYPA23A004391P1
4	GO:0007018	microtubule-based movement	LYPA23A001498P1,LYPA23A017028P1,LYPA23A015402P1,LYPA23A019947P1,LYPA23A014541P1,LYPA23A014558P1,LYPA23A008350P1,LYPA23A004906P1,LYPA23A003241P1,LYPA23A011656P1,LYPA23A010953P1,LYPA23A006756P1,LYPA23A012364P1,LYPA23A011008P1,LYPA23A022209P1,LYPA23A016687P1,LYPA23A017026P1,LYPA23A011454P1,LYPA23A016368P1,LYPA23A010640P1,LYPA23A014546P1,LYPA23A000327P1,LYPA23A000066P1
4	GO:0007017	microtubule-based process	LYPA23A001498P1,LYPA23A017028P1,LYPA23A015402P1,LYPA23A019947P1,LYPA23A014541P1,LYPA23A002606P1,LYPA23A014558P1,LYPA23A008350P1,LYPA23A004906P1,LYPA23A003241P1,LYPA23A011656P1,LYPA23A010953P1,LYPA23A006756P1,LYPA23A002562P1,LYPA23A012364P1,LYPA23A011008P1,LYPA23A022209P1,LYPA23A016687P1,LYPA23A017026P1,LYPA23A011454P1,LYPA23A010640P1,LYPA23A014546P1,LYPA23A000327P1,LYPA23A000066P1
4	GO:0051028	mRNA transport	LYPA23A018163P1,LYPA23A022451P1,LYPA23A015886P1,LYPA23A012529P1,LYPA23A013330P1,LYPA23A019533P1,LYPA23A003459P1,LYPA23A000890P1,LYPA23A003486P1,LYPA23A021210P1,LYPA23A000891P1,LYPA23A012491P1,LYPA23A012087P1
4	GO:0051287	NAD or NADH binding	LYPA23A008953P1,LYPA23A013182P1,LYPA23A001321P1,LYPA23A021127P1,LYPA23A013483P1,LYPA23A022025P1,LYPA23A004749P1,LYPA23A012585P1,LYPA23A014944P1,LYPA23A007372P1,LYPA23A018275P1,LYPA23A011131P1,LYPA23A014111P1,LYPA23A001037P1,LYPA23A010633P1,LYPA23A000839P1,LYPA23A011864P1,LYPA23A004514P1,LYPA23A018656P1,LYPA23A017158P1,LYPA23A005800P1,LYPA23A002265P1,LYPA23A019242P1,LYPA23A004391P1
4	GO:0050661	NADP or NADPH binding	LYPA23A008953P1,LYPA23A001321P1,LYPA23A021127P1,LYPA23A022025P1,LYPA23A004749P1,LYPA23A012585P1,LYPA23A014944P1,LYPA23A007372P1,LYPA23A018275P1,LYPA23A011131P1,LYPA23A014111P1,LYPA23A000839P1,LYPA23A011864P1,LYPA23A018656P1,LYPA23A017158P1,LYPA23A005800P1,LYPA23A002265P1,LYPA23A004391P1
4	GO:0051402	neuron apoptosis	LYPA23A008953P1,LYPA23A001321P1,LYPA23A021127P1,LYPA23A022025P1,LYPA23A014944P1,LYPA23A007372P1,LYPA23A018275P1,LYPA23A011131P1,LYPA23A000839P1,LYPA23A011864P1,LYPA23A018656P1,LYPA23A017158P1,LYPA23A005800P1,LYPA23A022989P1,LYPA23A004391P1
4	GO:0051170	nuclear import	LYPA23A022451P1,LYPA23A015886P1,LYPA23A012529P1,LYPA23A013330P1,LYPA23A019533P1,LYPA23A003459P1,LYPA23A000890P1,LYPA23A003486P1,LYPA23A021210P1,LYPA23A000891P1,LYPA23A012087P1
4	GO:0000184	nuclear-transcribed mRNA catabolic process, nonsense-mediated decay	LYPA23A001744P1,LYPA23A010617P1,LYPA23A003338P1,LYPA23A006941P1,LYPA23A008445P1,LYPA23A017083P1,LYPA23A006277P1,LYPA23A007265P1,LYPA23A011825P1,LYPA23A000032P1,LYPA23A012639P1,LYPA23A012127P1,LYPA23A021575P1,LYPA23A005348P1,LYPA23A000538P1,LYPA23A006289P1,LYPA23A009768P1,LYPA23A011047P1,LYPA23A021648P1,LYPA23A011716P1,LYPA23A022882P1,LYPA23A011299P1,LYPA23A017236P1,LYPA23A019215P1,LYPA23A004245P1…
4	GO:0000166	nucleotide binding	LYPA23A008503P1,LYPA23A020809P1,LYPA23A008706P1,LYPA23A008953P1,LYPA23A017083P1,LYPA23A008944P1,LYPA23A023245P1,LYPA23A020808P1,LYPA23A018163P1,LYPA23A005348P1,LYPA23A001321P1,LYPA23A002606P1,LYPA23A004599P1,LYPA23A019942P1,LYPA23A021127P1,LYPA23A022451P1,LYPA23A013483P1,LYPA23A000493P1,LYPA23A015886P1,LYPA23A013895P1,LYPA23A011299P1,LYPA23A022025P1,LYPA23A000085P1,LYPA23A008350P1,LYPA23A004749P1…
4	GO:0004984	olfactory receptor activity	LYPA23A019664P1,LYPA23A005936P1,LYPA23A019109P1,LYPA23A017484P1,LYPA23A014968P1,LYPA23A007517P1,LYPA23A003652P1,LYPA23A012071P1,LYPA23A009947P1,LYPA23A002617P1,LYPA23A021540P1,LYPA23A013513P1,LYPA23A017361P1,LYPA23A005330P1,LYPA23A010479P1,LYPA23A003651P1,LYPA23A020803P1,LYPA23A002271P1,LYPA23A009964P1,LYPA23A016662P1,LYPA23A017747P1,LYPA23A002703P1,LYPA23A019346P1,LYPA23A020218P1,LYPA23A013417P1…
4	GO:0016620	oxidoreductase activity, acting on the aldehyde or oxo group of donors, NAD or NADP as acceptor	LYPA23A008953P1,LYPA23A023245P1,LYPA23A001321P1,LYPA23A021127P1,LYPA23A022025P1,LYPA23A004749P1,LYPA23A012585P1,LYPA23A014944P1,LYPA23A007372P1,LYPA23A018275P1,LYPA23A011131P1,LYPA23A014111P1,LYPA23A000839P1,LYPA23A011864P1,LYPA23A018656P1,LYPA23A017158P1,LYPA23A005800P1,LYPA23A002265P1,LYPA23A022989P1,LYPA23A004391P1
4	GO:0005344	oxygen transporter activity	LYPA23A004474P1,LYPA23A001566P1,LYPA23A004475P1,LYPA23A004476P1,LYPA23A004473P1,LYPA23A019877P1
4	GO:0005886	plasma membrane	LYPA23A019664P1,LYPA23A005936P1,LYPA23A019109P1,LYPA23A001744P1,LYPA23A007866P1,LYPA23A017484P1,LYPA23A014968P1,LYPA23A007517P1,LYPA23A003652P1,LYPA23A012071P1,LYPA23A009947P1,LYPA23A002617P1,LYPA23A021540P1,LYPA23A013513P1,LYPA23A017361P1,LYPA23A005330P1,LYPA23A010479P1,LYPA23A003651P1,LYPA23A020803P1,LYPA23A002271P1,LYPA23A009964P1,LYPA23A016662P1,LYPA23A017747P1,LYPA23A002499P2,LYPA23A002703P1…
4	GO:0031346	positive regulation of cell projection organization	LYPA23A008839P1,LYPA23A008876P1,LYPA23A008835P1,LYPA23A008883P1
4	GO:0032273	positive regulation of protein polymerization	LYPA23A014074P1,LYPA23A014114P1,LYPA23A011939P1
4	GO:0022624	proteasome accessory complex	LYPA23A013329P1,LYPA23A004124P1,LYPA23A008570P1,LYPA23A000537P1,LYPA23A018090P1,LYPA23A014786P1,LYPA23A016469P1,LYPA23A009985P1
4	GO:0043234	protein complex	LYPA23A001498P1,LYPA23A017028P1,LYPA23A015402P1,LYPA23A019947P1,LYPA23A014541P1,LYPA23A002606P1,LYPA23A014558P1,LYPA23A016665P1,LYPA23A008350P1,LYPA23A004906P1,LYPA23A003241P1,LYPA23A011656P1,LYPA23A010953P1,LYPA23A006756P1,LYPA23A016415P1,LYPA23A012364P1,LYPA23A021905P1,LYPA23A011008P1,LYPA23A020414P1,LYPA23A022209P1,LYPA23A016687P1,LYPA23A004886P1,LYPA23A013244P1,LYPA23A017026P1,LYPA23A011454P1…
4	GO:0051258	protein polymerization	LYPA23A001498P1,LYPA23A017028P1,LYPA23A015402P1,LYPA23A019947P1,LYPA23A014541P1,LYPA23A002606P1,LYPA23A014558P1,LYPA23A008350P1,LYPA23A004906P1,LYPA23A003241P1,LYPA23A011656P1,LYPA23A010953P1,LYPA23A006756P1,LYPA23A012364P1,LYPA23A011008P1,LYPA23A022209P1,LYPA23A016687P1,LYPA23A017026P1,LYPA23A011454P1,LYPA23A016368P1,LYPA23A010640P1,LYPA23A014546P1,LYPA23A000327P1,LYPA23A000066P1
4	GO:0009615	response to virus	LYPA23A019490P1,LYPA23A008839P1,LYPA23A006277P1,LYPA23A008876P1,LYPA23A008835P1,LYPA23A004747P1,LYPA23A008602P1,LYPA23A005081P1,LYPA23A013445P1,LYPA23A001429P1,LYPA23A008843P1,LYPA23A001434P1,LYPA23A007015P1,LYPA23A008856P1,LYPA23A008883P1,LYPA23A008854P1
4	GO:0000028	ribosomal small subunit assembly	LYPA23A001744P1,LYPA23A003338P1,LYPA23A006941P1,LYPA23A011716P1,LYPA23A015530P1,LYPA23A004907P1,LYPA23A007534P1,LYPA23A001548P1,LYPA23A009347P1,LYPA23A008320P1,LYPA23A012355P1,LYPA23A021870P1,LYPA23A007847P1
4	GO:0006405	RNA export from nucleus	LYPA23A015886P1,LYPA23A012529P1,LYPA23A013330P1,LYPA23A019533P1,LYPA23A003459P1,LYPA23A000890P1,LYPA23A003486P1,LYPA23A021210P1,LYPA23A000891P1,LYPA23A012087P1
4	GO:0006407	rRNA export from nucleus	LYPA23A001744P1,LYPA23A011716P1,LYPA23A007534P1,LYPA23A001548P1,LYPA23A009347P1,LYPA23A008320P1,LYPA23A012355P1,LYPA23A007847P1
4	GO:0015891	siderophore transport	LYPA23A008839P1,LYPA23A008876P1,LYPA23A008835P1,LYPA23A008843P1,LYPA23A008856P1,LYPA23A008883P1,LYPA23A008854P1
4	GO:0015935	small ribosomal subunit	LYPA23A001744P1,LYPA23A000019P1,LYPA23A021410P1,LYPA23A002420P1,LYPA23A011716P1,LYPA23A003494P1,LYPA23A016375P1,LYPA23A001548P1,LYPA23A009347P1,LYPA23A008320P1,LYPA23A001664P1,LYPA23A021870P1,LYPA23A007847P1,LYPA23A006825P1
4	GO:0006614	SRP-dependent cotranslational protein targeting to membrane	LYPA23A001744P1,LYPA23A010617P1,LYPA23A003338P1,LYPA23A006941P1,LYPA23A008445P1,LYPA23A017083P1,LYPA23A006277P1,LYPA23A007265P1,LYPA23A011825P1,LYPA23A000032P1,LYPA23A012639P1,LYPA23A012127P1,LYPA23A021575P1,LYPA23A005348P1,LYPA23A000538P1,LYPA23A006289P1,LYPA23A009768P1,LYPA23A011047P1,LYPA23A021648P1,LYPA23A011716P1,LYPA23A022882P1,LYPA23A011299P1,LYPA23A017236P1,LYPA23A019215P1,LYPA23A004245P1…
4	GO:0003735	structural constituent of ribosome	LYPA23A001744P1,LYPA23A010617P1,LYPA23A003338P1,LYPA23A001682P1,LYPA23A011663P1,LYPA23A003190P1,LYPA23A019214P1,LYPA23A006941P1,LYPA23A008445P1,LYPA23A017083P1,LYPA23A000019P1,LYPA23A006277P1,LYPA23A007265P1,LYPA23A011825P1,LYPA23A015091P1,LYPA23A000032P1,LYPA23A012639P1,LYPA23A012127P1,LYPA23A019423P1,LYPA23A011536P1,LYPA23A021575P1,LYPA23A006062P1,LYPA23A022875P1,LYPA23A004080P1,LYPA23A005348P1…
4	GO:0005198	structural molecule activity	LYPA23A007568P1,LYPA23A001498P1,LYPA23A017028P1,LYPA23A000968P1,LYPA23A015402P1,LYPA23A007594P1,LYPA23A019947P1,LYPA23A014541P1,LYPA23A000963P1,LYPA23A000957P1,LYPA23A014558P1,LYPA23A008350P1,LYPA23A004906P1,LYPA23A000986P1,LYPA23A003241P1,LYPA23A011656P1,LYPA23A010953P1,LYPA23A006756P1,LYPA23A012364P1,LYPA23A017139P1,LYPA23A013219P1,LYPA23A011008P1,LYPA23A022209P1,LYPA23A017148P1,LYPA23A007238P1…
4	GO:0017025	TATA-binding protein binding	LYPA23A014187P1,LYPA23A005417P1,LYPA23A013329P1,LYPA23A004124P1,LYPA23A008570P1,LYPA23A000537P1,LYPA23A017954P1,LYPA23A018090P1,LYPA23A014786P1,LYPA23A016469P1,LYPA23A009985P1
4	GO:0003746	translation elongation factor activity	LYPA23A014441P1,LYPA23A017250P1,LYPA23A001970P1,LYPA23A010134P1,LYPA23A017316P1,LYPA23A009837P1,LYPA23A008269P1,LYPA23A000403P1,LYPA23A006919P1,LYPA23A000481P1,LYPA23A021021P1,LYPA23A003254P1,LYPA23A019980P1,LYPA23A016949P1,LYPA23A000692P1,LYPA23A011869P1,LYPA23A008060P1,LYPA23A006520P1,LYPA23A012104P1,LYPA23A021265P1,LYPA23A000693P1,LYPA23A005525P1,LYPA23A016909P1
4	GO:0006414	translational elongation	LYPA23A001744P1,LYPA23A010617P1,LYPA23A014441P1,LYPA23A003338P1,LYPA23A017250P1,LYPA23A006941P1,LYPA23A008445P1,LYPA23A017083P1,LYPA23A001970P1,LYPA23A006277P1,LYPA23A007265P1,LYPA23A011825P1,LYPA23A000032P1,LYPA23A012639P1,LYPA23A010134P1,LYPA23A012127P1,LYPA23A021575P1,LYPA23A017316P1,LYPA23A005348P1,LYPA23A000538P1,LYPA23A006289P1,LYPA23A009768P1,LYPA23A011047P1,LYPA23A021648P1,LYPA23A011716P1…
4	GO:0006413	translational initiation	LYPA23A001744P1,LYPA23A010617P1,LYPA23A003338P1,LYPA23A006941P1,LYPA23A008445P1,LYPA23A017083P1,LYPA23A006277P1,LYPA23A007265P1,LYPA23A011825P1,LYPA23A000032P1,LYPA23A012639P1,LYPA23A012127P1,LYPA23A002745P1,LYPA23A012144P1,LYPA23A021575P1,LYPA23A005348P1,LYPA23A016497P1,LYPA23A000538P1,LYPA23A006289P1,LYPA23A009768P1,LYPA23A011047P1,LYPA23A021648P1,LYPA23A011716P1,LYPA23A022882P1,LYPA23A011299P1…
4	GO:0006415	translational termination	LYPA23A001744P1,LYPA23A010617P1,LYPA23A003338P1,LYPA23A006941P1,LYPA23A008445P1,LYPA23A017083P1,LYPA23A006277P1,LYPA23A007265P1,LYPA23A011825P1,LYPA23A000032P1,LYPA23A012639P1,LYPA23A012127P1,LYPA23A021575P1,LYPA23A005348P1,LYPA23A000538P1,LYPA23A006289P1,LYPA23A009768P1,LYPA23A011047P1,LYPA23A021648P1,LYPA23A011716P1,LYPA23A022882P1,LYPA23A011299P1,LYPA23A017236P1,LYPA23A019215P1,LYPA23A004245P1…

## Sheet: S5-Pseudogenes
Cat gene name	Lynx chromosome name	Start position	Stop position	Cat gene description	Pseudogene sequence
ENSFCAP00000012418	lp23s26224	455253	458224	pituitary tumor-transforming 1 interacting protein [Source:HGNC Symbol;Acc:13524]	IAVAFGSRDCADEPAGLGQLGACYAPTSAPLPPCSQNTNRTCEECLKNVSCLWCNTNKACLDYPVTRILPPSSLCTLSSARWGVCWGKSSCSWNSCGVSTVWGSLGVLS*HKLPEHVLPAGSQEAGE
ENSFCAP00000019678	lp23s00152	51301	52056	Felis catus major allergen I, polypeptide chain 2 (CH2), mRNA. [Source:RefSeq mRNA;Acc:NM_001048154]	RKLAPFFMTSLLRWPVEVNYCWTPPSQKSMLLNQREQPSKKSRIATWRTDSYPRAWMH*S**GGHCLCWHCW*PKSWASRW
ENSFCAP00000001414	lp23s20963	163247	185242	coiled-coil domain containing 155 [Source:HGNC Symbol;Acc:26520]	GHPAPADPRSSPGAAAAAASLCLAAGPVPTSDLAPPSALLPSAAPSALPGRICSEPWCLW*KSWSQSAGRTGASSAWPPCTPSQSPHPSGRPSPWRHSRKPS*EVTQKTGRGGSRDPGQEKLPGRASAPSRRKEGAIDVKQEVADSALSSPLCGVWQWEEVIIETETDEEAEFPPEAPAGAEATGRGPGEKSGLDPGAAPVTGRGDPGHSAGTEAGNLTPGGAAESDP*GAG*RTQHAESLAKTLEEYRTMTQRQLFECERLICQRDAVLSENGKLLAERDGVKRRSEELATEKDALKEKEQQHLVAEMETLQEEYPAGSAVCQGCG*GAGGSEDSGQEPGGAESQPPGPGPTDGPPQLTC*AAWRTWSSATAGWPGRTPSSSAAWRQRRRDLRASGRR…
ENSFCAP00000006212	lp23s20963	402820	423343	small nuclear ribonucleoprotein 70kDa (U1) [Source:HGNC Symbol;Acc:11150]	MRAVTWGSPATNRCPPHPGPAPPRFPTGTGTGTASGSAGNEAARETRSENGDAPALGTGGGAHGVVTRRSGGDPGSVARTRTGNGSGERERETEHERGRGRESPRQALH*ERERERA*AGEGQRERETQNPKQAPGSELSAQRPTWGLNSQT
ENSFCAP00000006212	lp23s20963	402922	423342	small nuclear ribonucleoprotein 70kDa (U1) [Source:HGNC Symbol;Acc:11150]	GPGPGPRAGAQGTKPRERQGARTATQRERERQSMSGGGAERVPGRLYTVSTEPDTGLELTD*REREREHEQ
ENSFCAP00000006212	lp23s20963	402868	423342	small nuclear ribonucleoprotein 70kDa (U1) [Source:HGNC Symbol;Acc:11150]	RDRDRDRERERRERSRERDKERERRRSRSRDRRRRSRSRDKEERRERERDRA*AGEGQRESQAG*REREREHEQ
ENSFCAP00000006212	lp23s20963	402376	418035	small nuclear ribonucleoprotein 70kDa (U1) [Source:HGNC Symbol;Acc:11150]	ARPLPASPQGPGPGPRAGAQGTKPRERQGARTATLPLSGPAAALTES*QGGAEAIQGA*QGQGPGTEAAK*PEPGAGTTRAGAQGGATWWRRRWRHGGAL*GW*CAA**RASWGAGS*RP*RSRGEGPGSRPGTTSEPPERTGAAPGPRPRPGSRAQAGGAGW*AGQG*GPRWGWWRPGQRAGGSGQRKPRHVHGV*RR*WVSCSRERVFDGGCARGGGLGGTRRGGADVNIRHSGRDDTSRYDERWQED*RQEGPCGRGEGPNCEGLAAPAARYTWSTASGQESPVAMPSSSTNMSETCTVSTSGLNYDTTESKLRREFEVYGPIKRGTLTMIPMLRVMPSRLSLWLE*DGKKLSGDSRKWRQS*KCDPRDAPPPTRAETREERMERKMTQFLPPNLL…
ENSFCAP00000006212	lp23s20963	402881	423024	small nuclear ribonucleoprotein 70kDa (U1) [Source:HGNC Symbol;Acc:11150]	SRLRERRRRSRERERRRSRSLSLSRLRSLRSRSRSRSRSLRSRERQ*YQRRERERETETEDELERAEREAQNPKQGPG
ENSFCAP00000006212	lp23s20963	402746	427617	small nuclear ribonucleoprotein 70kDa (U1) [Source:HGNC Symbol;Acc:11150]	PPPPPRSSSLRSRSRRARSRLRLLRRFRSRSLSLLRSLDRLRSSLSRLRERRRRSRERERRRSRSLSLSRLRSLRSRSRSRSRSLRGGGGGEGERVPRGSSSQDRARLCGIPTPMSPSRHSRETECK*GRDRERGRHRIERERERERETECKQDGRAIFTRGHRTPAWGGGGGGGGGGRGGAGPGRAS
ENSFCAP00000021002	lp23s36495	2277017	2292492	Ly1 antibody reactive [Source:HGNC Symbol;Acc:26021]	VLAQYYTVTEEHHRSEEELLTIFNKKISKNPTFKLVKDKVKLLKVNSTGRELLKQF*NRPRTTK*QSKS*GKR*SRYREEKEEALRTF*GWRTGKPWGSCKRNRSVRGRTDSHSSKGPTRPA*NFPQRFQLPTPVTPQKSKQR*RRIKEKGRKKGRRIEKKRRKN*N*KATRRIQGVRSLRSAKQGKSKRPIRRLEGRPRALQGRRARARGARPRGRWTEPETPRRSRRSRRPGRERSARTNWMKNSLKVHNESILEQVWSIFSEASGNKINELIKRPNVSPKVRELLEQISGFDNVPRKKAKFQGGRLQKPREVHQ*RTEVWWQRL*R*NLQRRY*AAGMDPDGIFYVQCMWRICEESASGKARGRLPKL*VPVLY*LR*RFL
ENSFCAP00000019318	lp23s36495	3181554	3182349	Uncharacterized protein [Source:UniProtKB/TrEMBL;Acc:M3WY78]	MSDSRGGAQVKRGRKEGRKEGRKEGXXXXXXXXXXXXXXXXKKERKKERKKEKKKEKKRKKG*TAEQRSIWLGYSPNEASSSITAAWPCTGRLCPAGCREPSTACEHGKDMLPALFVRASVAQVEERGRK
ENSFCAP00000010234	lp23s36498	2162643	2163058	yrdC N(6)-threonylcarbamoyltransferase domain containing [Source:HGNC Symbol;Acc:28905]	LLKDLLSEPVTLVLESSQELSKDLNPFTPLVGTCTPDHGFMQDLA*VFEQHLLSPVPTLTLRPVLQMSRNSCTSGLNCCRSLMGDQLGMARALSTAWAQLWLTCLYLESLASFIQAVPWKVLHPSSHRSMGCSPHRDL
ENSFCAP00000009879	lp23s20986	482476	483976	N-acetylglucosamine-1-phosphate transferase, gamma subunit [Source:HGNC Symbol;Acc:23026]	KRPPLSTGAPGHPQTGQRNSSEATRDGEGTPWHTGSCGRRSGDSGAC*HSMASPTRRRRGYEKLLRALFEEAXRPAT*RPRRTVTPCGKEVPRPWRSRPWRTAVSVPRPAGGPAAQVGPGGTGPG*RADHVPGGAYLWEKQPPGTRV*AQHLRLRADLRDASGLPPALPVSIWHEWEISNNTFRGMWMRDGDSCRSRSRQSKVQVRAVPLPQRDAARADLPLERLQRDPGPAPAPGSLSAHLSARARRPARQLQGARCRPRRSLQWAPVLLSRVPAAGAPAGLGCRALFQGPRTSSGSPASASAWWSP
ENSFCAP00000022435	lp23s20956	213143	213892	Uncharacterized protein [Source:UniProtKB/TrEMBL;Acc:M3X733]	LHI*TPVLF**TKERQKKPDARS*SAPRSLMKI*RTLMHIRAQLPAVCTTWENSIMNRDIMRSGGYFYRRTAGLRKHCIITNWRSEAGLRWL
ENSFCAP00000004626	lp23s00021	2013563	2016286	transmembrane protein 225 [Source:HGNC Symbol;Acc:32390]	MGNISPRGIQATNMVFSSWALVFLAIGIIMEEWVELTLETKKNTVSHSPWICCTTLWPEDGLEVVRTMMILVLILSFIHNLFLGWNPPT*FLKLNIPSSSLSSSVSLQVSFCSVHS*CITKS*VKVNPCTTAVTRSPGSFSLPT*MSSSLWPLESSLSYSTNNPSRALPA*PSSVHPAEKLRTDRSLRVLSKLFPYQNSPQCFVVSFTQRKIFQTEHTSKHVV*PGL
ENSFCAP00000022794	lp23s00028	2050503	2063722	Uncharacterized protein [Source:UniProtKB/TrEMBL;Acc:M3X842]	V*RPH*S*LHLLSLDGPFHFTTTC*GT**LHKVFPF*GWPELCGKMSRWLAGGKQFHFQVC*SRSRVPSMPSKLHPRMEDGILTCHGP
ENSFCAP00000024377	lp23s36567	373121	376341	kinocilin [Source:HGNC Symbol;Acc:26488]	EPEAACPL*AEHWRS*SQGAGELRRAEPENSPPPGARPWGGKIQHQWQ*RGVPHLGLPLSKGSVQPGPHPAHHRWTSPSAAETSAACS*PVWPSAWWLAASSSVCPCPKLQPPWVASLLAPPVW
ENSFCAP00000009739	lp23s10683	172129	176630	suppressor APC domain containing 2 [Source:HGNC Symbol;Acc:28055]	EVTDKSERITQLEQEKSALIKQLFEARALGQQDAGPLDSTFIALPSLSSGAPCPALAPTSPSAPGWQQQTILMLKEQNRLLTQDLGTEGSPLPLGRLLPKVQEVARCLGELLAAACAGRLKQLKELEQEKEVLLQGLEMMARGRDWYQQQLQRVQERQRRLGRSRASTVQRPAGPGS*AWAMPIGPPAPEGNVGGTPSPTAWTVTCRAPTRASCPAACSRACARWPRPAAT*PSSASWPACAPRC*APTAARGARRAPRPGEAARRGPGVSRRRRRAWCSRRPTSRGRSWRGSPCPWARGPRQPSPAARPGA*RSCADPQRQRPVPRSPSGPRARRWSGARARTL
ENSFCAP00000017878	lp23s00069	888839	890686	shroom family member 1 [Source:HGNC Symbol;Acc:24084]	VLSI*LQPALANFSGDEV*MSMSLTSSMKPAWARGLTKLESPQSTPSMSTQRLQGQMTAGGG*MVL*AFPGLHAVAPLGLQMVTFQPSTPLDC*PLTHLQLQTPSNLFQLMSWNLQATVPQVLLAVLP*LGALASLFPGQHGTVCALRRWFRSWPDWIPL*VTHSLPVPVQSHPWVC*MG*FL*LRSGLR*GQPVRRLERTLLVLLSQGS*LRRKLQCCVLPSASRAVLQAMNRGSQRHALGLPDSLPFLMMKFSWKTSLWSE*DHLQTPMRPQETQPGCSPRSRNPQTVVSDQTFQVGRGRLATQQRKWCFSEPGKLDRVGRGGGSVGGCSSDACSSSGFAGPEPQERRVLAELEDHQIRWLPETQPRGTEDPEPRSLKFGDAHRPSSRSRSASGEVL…
ENSFCAP00000017878	lp23s00069	892093	894023	shroom family member 1 [Source:HGNC Symbol;Acc:24084]	EGRL*SCPYHLTWVFPPPQVKGKKQXXXWLAGQQEAPAAHQ
ENSFCAP00000023999	lp23s20867	2807360	2807708	NADH dehydrogenase [ubiquinone] 1 subunit C2 [Source:UniProtKB/TrEMBL;Acc:M3XBJ5]	MMSRRPGKVPL*FLLHEA*SLPQPKLTDLWLVHFCFLGDYFGLIDNAIWQRLVVLAGLHCQLLYVTSFVFIGYDLLKHQEYIYAVKDHGMFTYVKSHPEDFPEKDENLW*IS*GIP
ENSFCAP00000011463	lp23s05248	1215747	1228156	Uncharacterized protein [Source:UniProtKB/TrEMBL;Acc:M3WGS4]	SSDESPWTSKDQLPSFQPQLRGSERLPVALNSVLYGLPHLAIGTC*QPAGPSGGPPISFGGRELGTRTTMVTVAQLSLERPVETAVLLSLVGVRSILANQWPTFLQDNALRASVLWERCQMMVLLDLTRSYASMQRHAERSDSKSQAEWEQLLGSCSGFFFYGMESFLSHVAVERLAATNLQDMRTPVSVTREILERFRDSFTALWVGHLGNTHFPRPSHRGPLRGGPGHRTLRPGSSPPTASWSTPTTSSPTGP*RRRAKADSSGREIQLRRDTXXXXXXXEGLSVFEEGVDSVAREFSLQMLWSRLRREETEHRCPPLSRIQGDQRAKTRKGKCPCPRVSESAPEGRLGWGSPEGRTLSAEVWGSSGVHGGVPEAAVSSARQP*GQASARWHGWP*T…
ENSFCAP00000000794	lp23s20893	1243887	1250928	N-6 adenine-specific DNA methyltransferase 2 (putative) [Source:HGNC Symbol;Acc:27351]	VPSWKKRQRNFLA*RCANLFQNTPGPWEMSFAVM*IMILD*TVKSQ*IACVSAPSVYQKLRELHREDFSIYIFEYDKRFAIYGEEFIFYDYNNPLDLPEKIAAHSFDIVIADPPYLSEECLRKTSETIKYLTQGKILLCTAVEPVLVQPGDRFATCRGSHCSRGRMWQ
ENSFCAP00000024598	lp23s20893	455898	456772	Uncharacterized protein [Source:UniProtKB/TrEMBL;Acc:M3XD92]	MFMITNLSLIIPILLTIAFLTLVEPKLSGYIQLRKGPNIVEPYGPCGLL*PIANTIKLFTREPL*PLTSSISIFIRAPILAFSLVLTI*IPLPIPYPLININLGVLFTLAMSSLAVYSIL*SR*ASNSKYAFIGALRAVAQTISYKVTLAIILPSVLLINGVFTLATLVTTSTLAETN*APFDLTEGGSELISGFNVEYAAGPFALFFLVEYANIVIINILTTILFFRAFHNPYIPELDTINFTVKTLFLTFSFL*IRASYPRF*YDPLIHLL
ENSFCAP00000025355	lp23s00106	29487	29628	Uncharacterized protein [Source:UniProtKB/TrEMBL;Acc:M3XFE4]	MLQILLGFTFGNVFGMFLAQNYDISNLAKKLEEI*KGLGYQEETL*F
ENSFCAP00000021722	lp23s05342	1170	1761	fibrosin [Source:HGNC Symbol;Acc:20442]	GFALAVSFGTLQGAFQPKSMNLSCHHWHDWGQG*VGFTGFPKRGHRSPTISDHL*GNQGSGMPHTRLT*S*NTRKR*RVTPTTLTFRTTSCPAFSGWMGPCTLGRNSSAPPPPSSLQLVPSTLQPTLSPQLPGPREAF*APAPTLIPLGIPQALPHWLP*QGLWRPGQPHIQLQHHLCPERKPRASTNLRLPARPMG
ENSFCAP00000023058	lp23s31504	223395	225204	chromosome 6 open reading frame 141 [Source:HGNC Symbol;Acc:21351]	LHGLVSPINPSQG*GCQQXXXXXXXXXXXXXXXXXXXXXXXXXXXXRGGAPENRPVAENLDCEPWVREKVLFLLHPERWLGTPGDPAREEAAGEEDFFQAAGDDREPNCPSLFPGKKGISGSRVDAPFGAPPQDPAAPPKSVLVRIVDYQVTEEVLWTAWTQGRMTRRTEEHSMTAITFRTNRE
ENSFCAP00000005874	lp23s31711	10035	16660	ring finger protein 207 [Source:HGNC Symbol;Acc:32947]	E*PGECRREDREDVRTQREPPDSKQPQRRASTEKQRPS*TQTEKRGRGPNTERAPDCFRCPRGNSWTTYRTHTRRTSVLRPRPAQLRDLLQLKQENAYLTSITKQITPYVRSIAKVKERLEPRFGRNPTSG*LTSRRSTKSLQAEMQNLKDQVQELHRDLTKHHSLIKAEIMGDILHKSAQVDAQIALEYASLEGMRAVFQELLAEGEDTPFVEHCRHYEDSYR
ENSFCAP00000023088	lp23s31390	417789	420865	chromosome 17 open reading frame 105 [Source:HGNC Symbol;Acc:37241]	NSRRYIRNTTKYLLSRDLEQGNKKPGASENHRGKPGHSEEAWRSKTAL*PQVIRDRLAG*TKANRQNRI*KQATVSENRKRPSRPCQGGLLERIFFQE*SLLSIPNLRWHTRITF*N*ANYR*TIAWIISPTL*SSLITGRARPSGRNWTLATTYFTRIGYK*
ENSFCAP00000016535	lp23s15681	263107	263726	Uncharacterized protein [Source:UniProtKB/TrEMBL;Acc:M3WQA5]	MPQQAWWSKGPGGSWYLVDKLKPCSAS*GIPSTPG*AGTNRISRDNYSCWPPCRILGIRSSYPILEQITR*HGSITRS*GCRWPT*PRAEPCTAPAAWYHFPFCGAGCSWPP**Q
ENSFCAP00000001067	lp23s00146	275587	278288	trafficking protein particle complex 4 [Source:HGNC Symbol;Acc:19943]	V*AV*PEPEVSPGGGREGWNFWTWVRIKFVVLADPRQAGIDSLLRKIYEIYSDFALKNPFYSLEMPIRLFAIGSQLSPEQGSSGIEMLETDTFKLHCFQTLTVGHAVLAINGVDVNGKYTADGKEVLEYLGNPANYPVSIRFGRPRLTSNEKLMLASMFHSWRFLACTW*TKLAASSTSWTATRHGQRLRKLSVTLLICCSSCTTSVCWLPSASATASG
ENSFCAP00000000439	lp23s20902	298589	300106	ribonuclease H2, subunit A [Source:HGNC Symbol;Acc:18518]	GGLTDRGSGGTWEDHVLLQRRRPCPPPPAPPVLPGAGSGVSHHSHPKTKAWLRKHVEPVFGFPQFVRFSWRTAQSILEKEAEGVMWWPVTRL*RIGTLWKNYRAWTPIMGPVTPTQVFVDTVGLPDTYQERLQQRFPGIEVTVKAKADALYPVVSAASICAK
ENSFCAP00000004530	lp23s20902	886572	888010	chromosome 19 open reading frame 80 [Source:HGNC Symbol;Acc:24933]	TPHGGTSSRPR*QAEPHRVGPHRPRAATEAGTSSTAAPAASDPGEMEEDALKLQAEATAQALGEAAQGQRALRESMLRLEGQLRGAWLGHAQQEFEALKMPVLALCLLCALATEPWPSSAAPVGSLEPAQHEELTLLFHGTLQLGQALNSVYRTTEARLTKAGHSVGLYGHALGLLGQEVSRGRDAAQELRTSLLEMQ
ENSFCAP00000014387	lp23s26066	4795613	4800259	fibrinogen silencer binding protein [Source:HGNC Symbol;Acc:43653]	CKLG*GSTGWYEFTTGNVGSPSSCYYSGGEARRRH*APSSTGFKFSTE*YFRAKRRP*ISTCYGKIFVAVTFLC*HENDLVSIFYPKER*FFSA*AWRTL*VTVRV*PSDSANAERRASDNFRKSKKFWIVRSGEEGWIEKKAAARGRAAKSKN*SGEVESSSLTA*SA*M**SHGRKG*IFQFYLI*KA*FAKACEAIC*NSRRTH**TFSNSGKE*MLGYHSSKL*CNWSRSPSSNSPGPTHPLQKAQRICQTGAIAAKRDPIRF*KQYF*ANQESYGDDSPDFQFLPGKRQEPHSK
ENSFCAP00000015575	lp23s26068	524270	535177	tectonic family member 2 [Source:HGNC Symbol;Acc:25774]	FL*ATGFRRSISAY*SERLLRLRLQTRRSHHDCGQGIFYHSAGMLVESHRTVQRGLFHRRFWRRCQPSV*PAVFRAGGARGPWLVPVPVCAVAAGQLALPGLLLPRLRRM*LLFPTRCINPWVLVLVI*PLGPVTFAAAVTRARWM*Q*G*RGVCRGVPLTRQIPSQSPRVLSKLFWFRLLTIHPV*HICSFEWRFTPTLLRPGMHQAYCQLQLVER*PMRRETGA*L*PPVCWPCCRTRR
ENSFCAP00000011248	lp23s26085	1432733	1433844	Uncharacterized protein [Source:UniProtKB/TrEMBL;Acc:M3WGD4]	LSPNPGHRLALSLLLLLLLLGLGLHLLQMSLEVPLSSAVILSTFLQKHSPETLDLPGMTDLMEFLCPGPSPNSNKPDDVAMWQPSSGTRWKSGGCCPTSASCPGWPGTAWPSPTSRQT*QVLLEVSRMVSLISGRT*GSGDSCPYQGQ
ENSFCAP00000003092	lp23s16261	3393	11224	tripartite motif containing 29 [Source:HGNC Symbol;Acc:17274]	QTELSLQKEQLQLKIIEIEDEAEKWQKEKDRIKSFTTNEKAILEQNFRDLVRDLEKQKEEVRAALEQREQDAVDQVKVIVDALDERTKVLREDKQTREQMQSISDSVLFLQEFGALMSNYSLPPPLPTYHVLLEGEGLGQSLGNFKDDLLNVCMRHVEKMCKADLSRNFIERNHMENGDQESHITPKSGAMGLP*TRPTFLQ*WFLLICFTGGARTSYQPGSPSRLSKETNQKNFNNLYGTKG
ENSFCAP00000012385	lp23s10444	811363	811732	prefoldin subunit 4 [Source:HGNC Symbol;Acc:8868]	EVVNDTLEDQQKINKLAQNASRITELKEEIEVKKKQLQNLGDVCKDIMLADDDCLMIPYQIGMFSLAILKKKHRKC*KKQRKICKKKLIP*KPEWNQFRGRYRFESSVICKIREQHQPRS**Q
ENSFCAP00000012819	lp23s31283	1091242	1091679	nucleolar protein 7, 27kDa [Source:HGNC Symbol;Acc:21040]	RKRKRKPLPYNIPDKLTTAGQTT*RSHQES*KKLICRRKTKNTKKETIPRKLKRKPKKYSLE*KRLALRLEDQDLRDSRQRAGKAFRQDSSYGPRTDRTVVNKCLSLEKKRLPVRRATAQLLNNAWGTQKKQNAKWFKRQWMKKIM
ENSFCAP00000013771	lp23s31284	2282605	2284972	KiSS-1 metastasis-suppressor [Source:HGNC Symbol;Acc:6341]	ASGSDPRPSWPRGSRARDARRERPPGPNPTRGGPRCALLPRVPRGPSGQACAPPAAA*LIPAPRGAVLVQREKDLSAYNWNSFGLRYGKRQTAPPGSVRGGRCMNSLVSWQLMLFLCATSFRETFEKVAPVENPLST
ENSFCAP00000019876	lp23s31325	955924	956241	chromosome 7 open reading frame 55 [Source:HGNC Symbol;Acc:26946]	ALTL*GLLWVSCYMKVATG*PYCGTVAYWYLMKAFRAQQVTSEKLCRA*YELHFQAATCLCLPRSI*EHVALHQKFHGKGERSGEESAGLVGLKLPQQHGGNGWEP
ENSFCAP00000024434	lp23s20940	304007	305795	Uncharacterized protein [Source:UniProtKB/TrEMBL;Acc:M3XCS8]	MAP*RGRSQRT*WWRRRWRWWERTCWLELGGQYWPLGCWTWPHTVAVPYYGQVWHQQHLPFHPHPFPQSFILKWGAERERESKQERESTARSPLWTPVRRTCPAAPSSHPTSQGHRPVCNHSVP
ENSFCAP00000000348	lp23s05612	674	2770	Uncharacterized protein	VAIKDKQEGIETAAEGPPGAVCGLQSPPPLGAQDHHSGADHTGLQPPGGLHQCHHRPHQRAFAAGRAIPEDYH*QGHQGAQCLFVHHQQRRPHARKHH*I
ENSFCAP00000022168	lp23s15665	834563	838681	glypican 6 [Source:HGNC Symbol;Acc:4454]	AMNPVALGVAADTCLRS*MMG*PTRLTTLR*TWTSHGPTLSSGSRSWLYA**PTN*RTHTMATMSTSRTR
ENSFCAP00000002130	lp23s00001	5715630	5724189	family with sequence similarity 83, member D [Source:HGNC Symbol;Acc:16122]	FYVDRWQIK*Q*LGHSVWPSG*TL*SGVPNPVCTVEAHQLQAAV*LPDQRQV*PSSGQ*TPV*GAHVGRPAAPAAVPALEHPQEG*AGV*GPR*GQGGGQAPELRVLHRRR*GRCHQLPGQTTGREEDDRRGHPDGARRGGSSSEHERRGDTSQRHHGMCRDPDHGHHQGRELPSCGSVRVGHHPD*RGRECSLFSGHPV*RRVTSVQDVCVQISQFEVFLLSVFAGLCGELPGLPDVQQSP*LCPRWTRQVLGRPPLGSVLARLL*ELESRAPVSLCWYQVPAQPHAGHALQENIPC*ELPRFSFRKRCQSISESPGCERHRAVSLLPADDRPDYYRKHLLCEVGD*DSWAGSREVHTD*WHSRGYRLL*VIAVVMDVFTDIDIFRDLQEICRKQGVA…
ENSFCAP00000005286	lp23s31310	726351	729187	phospholipase D family, member 6 [Source:HGNC Symbol;Acc:30447]	ASRCDTIRTWATCITSLP*WTRRC*SRAPSTGPLKPFRTIEKMF*LWRMKSM*GFFWKNLSVSGKSLILQSIPFSHKRRGITAGCASGSSPTATTWPSTVRRSACSARQ
ENSFCAP00000017155	lp23s31318	440644	449848	Uncharacterized protein [Source:UniProtKB/TrEMBL;Acc:M3WS20]	IHL*TGSCKWGWQQL***LHCTNTCIHTRGNPASV**HSNRALFHICSLDSTR*VWVTPRHIIINSTTVELYWSPPEKPNGLISQYQLSRNGTLVFLGGNEEQNFTDKNLEPNSS*VSSHTPTIASHLQLVHLLDVLQASLF*VRHCRQPLK
ENSFCAP00000016903	lp23s31318	745542	750674	Uncharacterized protein [Source:UniProtKB/TrEMBL;Acc:M3WRC0]	T*SVKVLWAVSRICIL*RIIIPLLFGSL*FGRVLKSKSTCITAGRDVPRHYRREPSS*EQVFLGHTKWEHYYRREHGSVCGRASTGLYRPQEGS*WKFLQLMMVVNNITMANGMK*LLLGIRLSAKSHLMGSIQ
ENSFCAP00000019022	lp23s31318	733321	744494	Uncharacterized protein [Source:UniProtKB/TrEMBL;Acc:M3WXD3]	VSVVA*RMLNLHGVLSLTWHLCPAVLSESIWMDAYQLTALVTAGEMTPSWFTGEKSRVFMIVVSSLLQVIWN*RVEY*ASG*IPVLPLHKWIYGWDCPIVMGSGIK*LLKRKVPS*QQA*MN*GSVHHSPEPSH*W*IPWSMWEEPHRSCTTLLNT*VWNKMFHGGMDFEISLKFRTDQLNGLLLFVYNKDGPDFLA
ENSFCAP00000019238	lp23s31368	640420	645301	ceroid-lipofuscinosis, neuronal 5 [Source:HGNC Symbol;Acc:2076]	ETHLTRWQSG*NGTMKQGFIMRHGPSRPAQKRGQRHGLNPTTVPNLC*GHITSWLNLEQSSRR*KPTTQEYFFTVESLLIWEMKRLFLGQQEIRLLL*P*KGFITPSNHIHQLKNFCSVSCKFLMQ*LYTDSSICFIILNIGFYL*NSLLLK*HMKKSLYLTETTHSLV*KLCMMPLDSRVL*PARTTQWNGTNFSNLEIAHFPISDLK*MPLSGVIKELHAFLKELMIFTGR*MGH*FK*QLYQIRRFSFRPEPDPYCQAKYTFCPTGSPIPIMKDDDVIEVFRLQAPVWEFKYGNLLGHL
ENSFCAP00000018839	lp23s31636	71593	77685	chromosome 4 open reading frame 40 [Source:HGNC Symbol;Acc:33193]	DYGGNHYPLHPSLNIPYPMSDRDFAPPFCPSENKIPPYPENPDPDTGVPSFSWILTSPGDPFHHIPSFPATAWWIPSPPPRESPHFAPNSHKPKGPFFSLNAPLPTAAKPYVAIPQVSTRMTPPPNPEPVAVDPGAIDPDDAEPVAPEPQPSTFDF*KFLTSGERMKLLLWSCILCVAFTK
ENSFCAP00000019407	lp23s36642	438213	440081	ATP synthase, H+ transporting, mitochondrial F1 complex, delta subunit [Source:HGNC Symbol;Acc:837]	AAKVNLEKAQSELSGAADEASRAEIQIRIEANEALVKALE*VAAPSQ*TLIPQCSCWLKRP*PWTCWTWGYFSMVPTSGKWTFPRRREPLASWRPTYPPCRCCGRGWLLSTPRTAPPPNTLMLPVAVLRRPGLRCLVRQARAYAEAAAAPAPAAGPGQMSFTFASPTQ
ENSFCAP00000023922	lp23s10477	1419878	1420461	Uncharacterized protein [Source:UniProtKB/TrEMBL;Acc:M3XBB8]	MIHLNISRNQLSPI*SNRRIRACFQIQHRICNRSPCPIFPSGIC*HHHNEYSHNNSILWSIPQPVYTRTIYHQFHH*NSTPNNRLPMNLSILPTILI*PTDTPFMKKLPTPHPSPMHVTCILAHHHSKHSTSNNLKF*VCFNWSPTSHSPISYKVTLAIILLLVLLINGSFTLATLIT
ENSFCAP00000017388	lp23s05315	317394	322248	von Willebrand factor A domain containing 1 [Source:HGNC Symbol;Acc:30910]	ELAARWTGRLGRAENIRYRTGRGPRTGGAGEAPTADSRALPRHPQTPCSHSSSVPLRSRPAASAWPGRPC*PRTPATTCWSWRPAPSRGTCVASSCRGTPRAGPGSASTPTRTTTWSWCPSPTCTS*GRSTCGCTRCRVSWSQYRSWQPPGAVSCCLGSRRGSPALCGRGRPAHHCPGAEGVHSWSPSIGSPGGPAVSVGQLGQRVSL*VFPSSGVFGAAGGPTAPGP*CCPGRRSAWP*ACGWRWRGAAPNV
ENSFCAP00000018684	lp23s36510	1106383	1108874	phosphopantothenoylcysteine synthetase [Source:HGNC Symbol;Acc:25686]	ITMKMVPKMLSPLVKDWAPKAFIISFKLETDPSIILDRARNALEVYRHQVVIANSIESRRSFVVILTKDSETKILLSEEEVEKGVDIEDKIVDDLQSRHTAFIHDKNALLRCFTWLRPCQISMFLSQKCLNTRSSHLGAHCSASRPRPGCRRCGPAAQPLRAC*AWRQRRMHFRASRPLCGATRRLRLPAPSLPWSSPLWRTICICCRLRPRRSIRW
ENSFCAP00000005648	lp23s10726	114466	120836	BCL2-like 12 (proline rich) [Source:HGNC Symbol;Acc:13787]	EGILAISPVDLNLPLDLASDPALRGKLARLSSGSFARLVELFSCRESSPLPGRARPSLPCPGPPPPSPEPLARLALAMELSRRVAGLGGTLAGLSVEHVHSFAPWIQAHGGWSYRVPHPQRRKPCCGSWWPCWRKRQTSSTRRPSYSGFLCSGGPAARTAGPRATEIPT*PRSPAQEEPTDFLSRLRRCLPCPLGRGAVPPESPRPCSLPLRPCYVSEPEVPPWQARKSWGSGRTR*ES*RPSLGEVRPPGPPFQPHPAPHPFPNHTF*GLPAKGMLGTSHAN*VGIPRTAPWATLPAPTRPTAQARES*TSKSLRKSTEGGGGGGSRHQ
ENSFCAP00000018842	lp23s00121	579971	580605	chromosome 10 open reading frame 10 [Source:HGNC Symbol;Acc:23355]	MRSRLLVPVAHLPTIRETSEEMPPGGPGQEPLASPSLDDYVKSICQLAQPTSVLDSATARAQLGRPPQPAQAFETSCPTESLRDITTRFSGQQPAPPRDGAADPLDWLYGESQENQPSRRDPLRRTGSSADPWGPQRQMDGGKARGTPGGRLCGARVQGHSLARPSRDRHQGSWPSKPLCGTAASPPPPPPPPATAAPSELSICTSR*SMN
ENSFCAP00000023173	lp23s05213	6673573	6673987	Uncharacterized protein [Source:UniProtKB/TrEMBL;Acc:M3X971]	N*LVPPPRRCSAAPGPAPRPSLRSPKLDLPRVSLAVLGSPRLVLRRPPSRRSAPP*RRKI*RGPVGTWPRTRKSSPRPTRSCGSV
ENSFCAP00000021237	lp23s05213	2618266	2621633	Uncharacterized protein [Source:UniProtKB/TrEMBL;Acc:M3X3N7]	KVSVFLCVLWKTQSLPPQLQEVLSPSQE*KQRSKITSQYHWARTRNHCNKRNANHSVHPTRRPLWIKARQ*GRPI*KDP*QNVLHAE*KFLWRSDPKRVALLPWTKSLWMGVPNP*QEKYCLLSCPLCQLVPR*EVV*KKGMIKVR*LNCRKTDRKGFWKELKRLKN*QRKLFPSKDKR*ASWLPGSRRTRC*FRYLG*GMSHLREWQGTAETGREGQVLGR*EPLLGRVEQGLSHRFFWTAGRMAQLFLQQASRPLELKE*LLG*SVRSWVLQSHQGPQRISLRQW*RGSLCRQPTLGGQAPRIH*FIWEMGQALLRLPELEQNKEPQL*IWVSVTRARKESVLGWMVRQLPGFLKSLRKGVVREKPKSSKIIIPHSLLEWRVRKKSPAHLL*GKMEI…
ENSFCAP00000007804	lp23s05214	3227523	3227863	Uncharacterized protein [Source:UniProtKB/TrEMBL;Acc:M3W9K1]	EMCYIASYLLTSSRAMLPPSAKDIKKILDSMGIEADDDLLDKVICELTGKSIEDIMAQGIGKLASVTAGGAVAIRASQDLQLLLLVPSQLQQRRRRMRRKN*RSWTMTRDLTC
ENSFCAP00000001208	lp23s20973	520172	524835	pyridoxamine 5'-phosphate oxidase [Source:HGNC Symbol;Acc:30260]	GWLHPVPTSDGVLARPNQPPA*PDHLSAGPANRRLPFGAHDPPWGGRLALRETCTLSEKEKRGTGTALPRARGAKAKILVRVEGSVKKLPEEEAECYFHSRPKSSQIGAVVSHQSSVIPDREDSNPFASLVFYWEPLNRQRRKTLCPHGAAEGLWQGWLPFLH*LRESKGKRAGI*GDSADLPGPREAVCCLV*GGC*VS*HRGSQCHVPGYMYQMTCGLRGVTATFGQPTERPLPPPPVRWRYRHGPGTDAQELPRGPR
ENSFCAP00000023208	lp23s20938	589686	593254	Uncharacterized protein [Source:UniProtKB/TrEMBL;Acc:M3X9A6]	RPCSP*LTSSRPFVSCCREKLTT*KSNLMTRKRLSTPQDRKGSSNHLEHRAVLGFQHTGQSRLVRSCIVRQAVVVTSTPEPPSFREAHSPWLRARETSCPESPHPRMSAPDEVSICGAGFGEEGGEQTGVRPASPGAPRGPQGLGVDLGPPPSGEGEGGVPDPEGFESEREVTETGGPVFWDLEGRPGSPTDHTGDALDCASHLADEAVAAIVQ*LTNQDGLGVRRNPYPEGCVVEAGLEAGPQGRGALALSRRESQPPAAALLRLGGPEGGPAWANPKRSTKSRSNVAVVDRQRPSAESELLSHSESADEFSEIQLMRVSIYAKGGGQLKPKSPEDPWDTPRHSKFHVRENFLHMLGSFPSSAPRGVTSVVESQVVGELDISSSRKMQSVVRGKGGRN…
ENSFCAP00000023759	lp23s05289	316013	319098	chromosome 3 open reading frame 22 [Source:HGNC Symbol;Acc:28534]	AWGTRFYITVQPQPPAAATSTELPLGIQATEPPFPWVRSPCCPHWCPCCPPLQGPLRSLG*RPPTQSS*SPGRPRREMTHCGISCPCRRCWCQQDPFQSEDEVEGPQEVPPT*EEEHQDPGKFCQKVSVQ
ENSFCAP00000021403	lp23s20853	4111269	4125916	Uncharacterized protein [Source:UniProtKB/TrEMBL;Acc:M3X453]	EEKPFLEVHQAEHVKRLLRKAPLQFLGKYETVMFYWPSLLCLAFLLGRFLHMFVKSLRVHLGWELQMVCCHHPLHHTVSPWAAFVLLIGGMEVGLSHFPFFACLSSEFRLVSSILGFSYSLI*PLDFVGTFSNRWSYGIAFGATANKVMFLFSEGYQPLHIPQWAQAFHHFGLVLSPKTRAP*AER*YFSPPGEPLWNHHRTRQLNGTCVSSVDMELFLHYSLIPS
ENSFCAP00000014288	lp23s20850	7693552	7694462	Uncharacterized protein [Source:UniProtKB/TrEMBL;Acc:M3WMJ6]	TPRSEGTWPRPPPAASPPGPLPVSLPPQVKPRPDAPPLLAPGLEPSPGKEMPAPGRSRSEPCHSIGCPQRTGDLSVQSERVLSMPLIHCLRHHQPWTDKHLDLLTSAAACWPFLWRPSLLSRNTRSRTVSFVDVRPLPGLRMQKPQSLELPQLPETVHRGLEAAARALWDQGLSFHQTGPEAPEARLPGLAEVAAAVSAKAKSEAEATGPRVSRTPPAPSMQRPPAPSLISKCTCACIQALRVALRL*PVSPYLYQEAPSSTAQDPRAAAASE
ENSFCAP00000014288	lp23s20850	7694483	7694995	Uncharacterized protein [Source:UniProtKB/TrEMBL;Acc:M3WMJ6]	QASATAPLKPAHSHAAGGGGGLGGWTGTGAAITAGVQEPGAPPDGGAQVSPRGTNWGATTVEQRNEPAKSQMSPKKMPEPGGKSRGPGGVCELYGKHLTNSSNLTVRWCSHTRALILRLRAEQ*ALYHHRVRSLGPGSSRSACRHRGMSFGPGATLDNQLWQKHPQMGGEA
ENSFCAP00000003262	lp23s20850	3048853	3051397	family with sequence similarity 196, member B [Source:HGNC Symbol;Acc:37271]	AQLLSNWPRSQQLQYLPEYSMHHIHGPAKYESAACASKA*QPRVSGVCEATPPPQEQISTGSIQGRWDQ*DSTWPS*G*CPDF*GPRCDGQDSSLQAPSPSHLLTLLPQVPEGRGLSEHCDPNLP*SQEAFPSFQKEETHSQQVPGRNANSIPKCHPGQRQPL*TGHCVL*PCLLKIGSAS*GWASKGQSVSSISS*NVQGAEQWAY*HMLGSRGLEGLRESNCCHSGPR*YLPQSYLGS*KVHFQPRQVR*YKQLHTSFG*HMSR*WENSATIRFRKIPFLLKCHQRCQPHARHRET*TRIAFAQRQL**QRPWTIVISVKGNMCSLTSTDSLLPLTRLPQPASPSGRGFRLFFIEQQSPGSAVTQN*QCVKICPHVSGADGKEPHPVRHPGLSKLFR…
ENSFCAP00000005541	lp23s15674	644357	645041	histone cluster 1, H1c [Source:HGNC Symbol;Acc:4716]	PPRRSPRALLCPS*SCKPCLPPRSAAACPWPRSRRRWRPPATTWRRTTAASSWASRAW*ARAPWCRPRAPAPRAPSSSTRRPPLGRPRPTPQRWRKPR*RAPLRSPKRSRRLLKKPSRPRKRPRSLL*PRSPPRVPRSPRS*SLRK*PRALPKPRL*SPKRPRRR*PSQKPLPSPKKCPRPRRPRRPPPLPPRSPRRARRPSDPRK
ENSFCAP00000024540	lp23s00013	1140129	1141928	nudix (nucleoside diphosphate linked moiety X)-type motif 19 [Source:HGNC Symbol;Acc:32036]	EMNCT*KIQTL*RMLCPQKKRLEKS*RKARHFTEWCYTAAMCTVST*LSSQSINMFILRPT**VRATYLHQRQLRVSYRKKFG*HPHSSTK*EGLETLPLSLTCTNFVWMVHWKRWKDGCRSHF*LLMQCSSFYQ
ENSFCAP00000017874	lp23s31304	758099	758434	chromosome 6 open reading frame 57 [Source:HGNC Symbol;Acc:20957]	AQVGTMIVSGVAGWPGCIPATV*RVARSPLLSHSVRKMSSQGEKSKAIK*SLKKPKLPEGCFDAPEDSHLEKEPPTKFLDDVNPVTKEKGGPRGPEPNQYGNWK*KVHCIDF
ENSFCAP00000023756	lp23s31304	801233	805921	Uncharacterized protein [Source:UniProtKB/TrEMBL;Acc:M3XAV2]	FNIA*DYWAGFH*ETS*LYSGENLLWFFIGLGRNIWNLPQTVSGA*REIMWLMWKLQ*HSI**FHHSARCS**P*VPWFSVLLLSVNQLVLFRPRGNSNLWA*NKKEWNQ
ENSFCAP00000017931	lp23s00334	37480	41335	Uncharacterized protein [Source:UniProtKB/TrEMBL;Acc:M3WU94]	K*LVFLYRNKDLDIC*TKKGIMKRNQFPMWK*NLQWKKMAFFR*KKTFHLQIISSTLNQKTVALKGMDLWLWRAQSPFPH*VVVYLLLR*Q*VTETLPLLGKKMLMFYMRSLNLEMAKYILIL*PPKQ*LMVWGKVQL*NRMWKQQMALNSLHLAILSLKVEENTLHSLTYTTI*SLMILSVSPKRTQMFLRTLRNINCQSSQCTMQTLVIIEMAIKPLLP*HQAMLRNCSHTITQIICLPIHLCLPIHLCLHQRATEQVNSHPSSEQKIILHLQMIQIATLSLLIQ*QGTLDLFQRETTQRLFKLGYITFPHLGTIYQVTLQLTRLQLTLLMLTV*EATLLRQRLQGAMLHLHLLLCRILLLSASQIPDLPPTPQ*HRAGWLFLGKITSRPLCP*PPT…
ENSFCAP00000019550	lp23s26179	504148	506558	BCL2-associated athanogene 2 [Source:HGNC Symbol;Acc:938]	EKEKN*I*RQTV*WEERSLLKFQ*KLLEIPSSKNP*STPPGLLMRWSVSFWMIWETPRVT*CHCTVLVHLRCHLGLLTRSFSP**LAVLLKIRRKLRED*RLCLEILKTLTRPSSC*SILKELVPKLCNKMLKANLIFPISTGWRL*EKRQLLWSKRKKSSWR*STASRIART*GRSAM
ENSFCAP00000001556	lp23s10506	171171	176435	chromobox homolog 2 [Source:HGNC Symbol;Acc:1552]	VASAGRAPLCTT*TE*ARARPRPPADWRSRPRPPASAASGWTSR*GRRRGNWG*APREAKPQRPPAAGLWSRKEGVRGGPPTSTAVARPLPGAWAPSLHPPRS*APRSWTYRVSRTAHQGWVRLPAMLRPPRASLPPTRPLGRAPGAPPPGGVGPACPATPTRVRSWLLGGPLCPPLQARGTVSRAARAPVGRRATRAPEKCARRPCRPR*APERRTAVPTPTPTRPPRPALDRTCLCLSRPARTGSPPAASSSTSLSPMSPPTSSQSR*RSPPPAWASST*DITNPTPPPSPAVPRLRPRLPPRPRTKTKTAT*TPRGVPGAARPTRCLRRRPRSWWPSLS*RTPSGRSEAGTREGGAEPEARQAAEGQAQEAHGDVL*PALQAQVQTQQLGARGKYP…
ENSFCAP00000008933	lp23s00203	265998	271414	centrobin, centrosomal BRCA2 interacting protein [Source:HGNC Symbol;Acc:29616]	IPSQALPRRLAAAAPRTDKPPARRKGGHPAPSSTRSRGGIWRDGQPGG*CPQKEHGLPLG*DPPERGGDGLAPARQLMDVSQLLRLYQARGWGALPAEDLLLYLKRQEHGRPPDCPVLGGGPAGATPPAPCS*D*SAPGHGVQSLPGSRASLKPFTEQRPPGGLPRARCWR*YRRAARPPLLSCCPRSLPGLSLPPAPSTPITAQSGRSLRKILDPTGTAS*SRGCSPLPSWTASNIFCTRNGSLRSKIHIFNFDRNLIDITKPPLIWNLKFVIKASGPHLVSLNAQAVDPCSVSVLCPGPRHQPLQPWASGAREGREEALDSASRGRGPEARVAAEPGSWGRTATAGSPQPLPRPEPPAGPPFPEPALLPAPGAKAGPHFVCYLWKQLQDLSGQHQQE…
ENSFCAP00000019779	lp23s00205	166420	166644	Uncharacterized protein [Source:UniProtKB/TrEMBL;Acc:M3WZI8]	AHNFGDKVRLLSDPTGAFGKEMDWLLDNSLVSVFGKHQLKRFSMVEEDDIVKSLHVEPDGIGCTCSPAPNII*QL
ENSFCAP00000019779	lp23s00205	166648	166939	Uncharacterized protein [Source:UniProtKB/TrEMBL;Acc:M3WZI8]	GKAYGFSSASSAMAPVEVGDSIPSVVVLGGEARNKLNLAELFRGMKGVLFGIPEAFTPECSKTHLLGFVEPAEALKAKGSR**HVKF**CLCD*KVG
ENSFCAP00000000975	lp23s00206	159385	161955	junctional sarcoplasmic reticulum protein 1 [Source:HGNC Symbol;Acc:24963]	*PRAVGGREGPGPAGEACADPTVSHRRRGSRSPRPGSPHRDRPRPRWRRRRRPRFLGAGRLQRRLLGKSARPRRRLGRRRGLGGRGRRRRRGRRRRGRGGRRGLGSRRSHGPPGSPEQPYRGAGRQAKGAVGLGRRTLETPGAGRGRPGAPRGARTGTGLRAARSSGLARGGTSPEPRPQEGAGRPSPAAATAAPDPGPERGAALGRPVTQQVPGARLTPGDAGFGLPAVPRILKSRQQRAAPQAMWMPGPRRQKKSL*PKWPRELGKRG*KLEQQHRGWPTLAAGPLSP*QPGPCRSWMGAWAAAKQARTSPRWLTPALTRPWRTELE
ENSFCAP00000023343	lp23s20881	430994	431867	Felis catus cyclin-dependent kinase inhibitor 1B (p27, Kip1) (CDKN1B), mRNA. [Source:RefSeq mRNA;Acc:NM_001009870]	IPLLKTKEPTEQKKMSQTVPRTRVQWSRRPRSLA*EDVKRCRRRRARMSAGTARRCL*LGLRQTQRTHIW*TKRLIHRTTRRG*RSSALG*GSDLLQM
ENSFCAP00000013366	lp23s15646	1955105	1965341	testis expressed 35 [Source:HGNC Symbol;Acc:25366]	ETYPFRVLRSSQRWW*SSDLHLLPSLSCPKSPRKMFVVCPKEQLQSGSP*KRSKGAAGVHADGKDGHRPTAPAQESGWS*WHATHSPREDDGTSETKKGPTGFPSSRQDLLRNAEGYG*EDGCFNKYAQEQQIKGIMDKDFDKLQEFVEIMKTELREVKEELKEKMDEIKQTYDYKGIKQEGLFTKPGGTQELRSKNYKAMCLELKPEPTKMSAKRAELKKSNL
ENSFCAP00000024181	lp23s10425	6094780	6095308	chromosome 16 open reading frame 13 [Source:HGNC Symbol;Acc:14141]	GVHGHKVASGPDQLRVHFAQASPPPPHRMAAMDQRCLDSRISATTQAQGHPT*WPCYTWT*AGIGSNGAGSCHGHWTCCLASV*STSAPRTAPRGSSEQKGTC*NPWCR*SPTGPMKPTARSLHKVTKILN*PLDAGAWSRDFRHGPPRGPGPSQWPAPGEDGGHAS*QVPEIPEG
ENSFCAP00000000934	lp23s31341	596514	596830	DET1 and DDB1 associated 1 [Source:HGNC Symbol;Acc:28360]	QKMADFFKELTVYNKSNFSRFHADSVCKASNRRPLVYLPMWEYPFDQIIVTEKINILLCYLHQQWDKKNANE*RDQEQVDLEGESWATPTPAPTRSLTAQTCIRT
ENSFCAP00000017031	lp23s20957	162586	162978	optic atrophy 3 (autosomal recessive, with chorea and spastic paraplegia) [Source:HGNC Symbol;Acc:8142]	NPLGDSESRLGSRSLG*SPRIHSHVSAALSLEPRRVSALTLQP*L*IL
ENSFCAP00000019511	lp23s10490	468987	476262	Uncharacterized protein [Source:UniProtKB/TrEMBL;Acc:M3WYS1]	KA*PLL*S*MHCA*NLEKNQCISLLTLTLGCSPPITTT*EEVLIPQGMCLQYS*HLEISTGKLKELVLKKPSTQLLPKLWKEQNFLNP*SALFVAKEGIQFLLAWHTPKRKPQCVL*MS*PVSTRFSLSISFCVSKVQLTVRCLKFKCKFRTHLLLSQGAKY*TRTSLFSHSL**VFLLLLALCPLKMQVDLFKTLLYPLHLSHPPVQLQ

## Sheet: S6-Saguaro_windows
Chromosome	Saguaro_index	Start	End	Block_length(100KB)	Tree3	Raxml_topology
chrA1	7	2330	93907	0.91577	((PLE,(PUN,PTI)),((FCA,AJU),(LYP,LLY)));	1
chrA1	19	93937	192720	0.98783	((PLE,(PUN,PTI)),(FCA,(AJU,(LYP,LLY))));	3
chrA1	7	192844	363869	1.71025	((PLE,(PUN,PTI)),(AJU,(FCA,(LYP,LLY))));	2
chrA1	14	363909	591631	2.27722	((PLE,(PUN,PTI)),(FCA,(AJU,(LYP,LLY))));	3
chrA1	0	591632	1752029	11.604	((PLE,(PUN,PTI)),(AJU,(FCA,(LYP,LLY))));	2
chrA1	19	1752075	1800416	0.48341	((PLE,(PUN,PTI)),(AJU,(FCA,(LYP,LLY))));	2
chrA1	7	1800481	2468422	6.67941	((PLE,(PUN,PTI)),(AJU,(FCA,(LYP,LLY))));	2
chrA1	19	2468424	2497374	0.2895	((PLE,(PUN,PTI)),((FCA,AJU),(LYP,LLY)));	1
chrA1	12	2497378	6076480	35.791	((PLE,(PUN,PTI)),((FCA,AJU),(LYP,LLY)));	1
chrA1	14	6076667	6188252	1.11585	((PLE,(PUN,PTI)),(AJU,(FCA,(LYP,LLY))));	2
chrA1	12	6190116	6744625	5.54509	((PLE,(PUN,PTI)),((FCA,AJU),(LYP,LLY)));	1
chrA1	7	6744662	7766946	10.2228	((PLE,(PUN,PTI)),(FCA,(AJU,(LYP,LLY))));	3
chrA1	19	7766972	7832350	0.65378	((PLE,(PUN,PTI)),(FCA,(AJU,(LYP,LLY))));	3
chrA1	0	7832408	8000019	1.67611	((PLE,(PUN,PTI)),(AJU,(FCA,(LYP,LLY))));	2
chrA1	12	8000086	8688301	6.88215	((PLE,(PUN,PTI)),((FCA,AJU),(LYP,LLY)));	1
chrA1	7	8688340	9658431	9.70091	((PLE,(PUN,PTI)),(AJU,(FCA,(LYP,LLY))));	2
chrA1	19	9658554	9675768	0.17214	((PLE,(PUN,PTI)),(FCA,(AJU,(LYP,LLY))));	3
chrA1	12	9675841	11738035	20.6219	((PLE,(PUN,PTI)),((FCA,AJU),(LYP,LLY)));	1
chrA1	14	11738040	11898673	1.60633	((PLE,(PUN,PTI)),(AJU,(FCA,(LYP,LLY))));	2
chrA1	12	11898861	12290793	3.91932	((PLE,(PUN,PTI)),((FCA,AJU),(LYP,LLY)));	1
chrA1	0	12290813	13931556	16.4074	((PLE,(PUN,PTI)),((FCA,AJU),(LYP,LLY)));	1
chrA1	28	13931731	13953197	0.21466	((PLE,(PUN,PTI)),((FCA,AJU),(LYP,LLY)));	1
chrA1	7	13953229	15798793	18.4556	((PLE,(PUN,PTI)),((FCA,AJU),(LYP,LLY)));	1
chrA1	19	15798801	15887549	0.88748	((PTI,(PLE,PUN)),(FCA,(AJU,(LYP,LLY))));	9
chrA1	12	15887573	20115739	42.2817	((PLE,(PUN,PTI)),((FCA,AJU),(LYP,LLY)));	1
chrA1	19	20115833	20147627	0.31794	((PLE,(PUN,PTI)),((FCA,AJU),(LYP,LLY)));	1
chrA1	12	20147711	21549034	14.0132	((PLE,(PUN,PTI)),((FCA,AJU),(LYP,LLY)));	1
chrA1	14	21549069	21658332	1.09263	((PLE,(PUN,PTI)),(FCA,(AJU,(LYP,LLY))));	3
chrA1	7	21658483	22364701	7.06218	((PLE,(PUN,PTI)),(AJU,(FCA,(LYP,LLY))));	2
chrA1	19	22364721	22536380	1.71659	((PLE,(PUN,PTI)),(AJU,(FCA,(LYP,LLY))));	2
chrA1	0	22536823	22930095	3.93272	((PLE,(PUN,PTI)),(AJU,(FCA,(LYP,LLY))));	2
chrA1	14	22930232	23075556	1.45324	((PLE,(PUN,PTI)),(AJU,(FCA,(LYP,LLY))));	2
chrA1	12	23075580	28848865	57.7328	((PLE,(PUN,PTI)),((FCA,AJU),(LYP,LLY)));	1
chrA1	13	28848932	28851551	0.02619	((PUN,(PLE,PTI)),(AJU,(FCA,(LYP,LLY))));	7
chrA1	7	28851621	29463227	6.11606	((PLE,(PUN,PTI)),(AJU,(FCA,(LYP,LLY))));	2
chrA1	28	29463939	29476334	0.12395	((PLE,(PUN,PTI)),((FCA,AJU),(LYP,LLY)));	1
chrA1	7	29476403	29753965	2.77562	((PLE,(PUN,PTI)),((FCA,AJU),(LYP,LLY)));	1
chrA1	28	29753986	29766550	0.12564	((PLE,(PUN,PTI)),((FCA,AJU),(LYP,LLY)));	1
chrA1	0	29766684	29793835	0.27151	((PLE,(PUN,PTI)),((FCA,AJU),(LYP,LLY)));	1
chrA1	19	29794243	29822807	0.28564	((PLE,(PUN,PTI)),((FCA,AJU),(LYP,LLY)));	1
chrA1	7	29822936	30258397	4.35461	((PLE,(PUN,PTI)),((FCA,AJU),(LYP,LLY)));	1
chrA1	12	30258520	31566317	13.078	((PLE,(PUN,PTI)),(FCA,(AJU,(LYP,LLY))));	3
chrA1	14	31566361	32049048	4.82687	((PLE,(PUN,PTI)),(FCA,(AJU,(LYP,LLY))));	3
chrA1	13	32051209	32055042	0.03833	((PUN,(PLE,PTI)),(FCA,(AJU,(LYP,LLY))));	8
chrA1	0	32055078	32202172	1.47094	((PUN,(PLE,PTI)),(AJU,(FCA,(LYP,LLY))));	7
chrA1	14	32202193	32455033	2.5284	((PLE,(PUN,PTI)),(AJU,(FCA,(LYP,LLY))));	2
chrA1	19	32455148	32486561	0.31413	((PLE,(PUN,PTI)),(FCA,(AJU,(LYP,LLY))));	3
chrA1	0	32486678	32674384	1.87706	((PLE,(PUN,PTI)),((FCA,AJU),(LYP,LLY)));	1
chrA1	28	32674413	32679176	0.04763	((PLE,(PUN,PTI)),((FCA,AJU),(LYP,LLY)));	1
chrA1	26	32679269	32704436	0.25167	((PLE,(PUN,PTI)),(AJU,(FCA,(LYP,LLY))));	2
chrA1	19	32707512	32751699	0.44187	((PLE,(PUN,PTI)),(FCA,(AJU,(LYP,LLY))));	3
chrA1	0	32751736	32963979	2.12243	((PLE,(PUN,PTI)),(AJU,(FCA,(LYP,LLY))));	2
chrA1	12	32964290	34210524	12.4623	((PLE,(PUN,PTI)),(FCA,(AJU,(LYP,LLY))));	3
chrA1	7	34210555	34781275	5.7072	((PLE,(PUN,PTI)),((FCA,AJU),(LYP,LLY)));	1
chrA1	19	34781362	34816601	0.35239	((PLE,(PUN,PTI)),((FCA,AJU),(LYP,LLY)));	1
chrA1	14	34817264	35636516	8.19252	((PLE,(PUN,PTI)),((FCA,AJU),(LYP,LLY)));	1
chrA1	0	35636524	36279302	6.42778	((PLE,(PUN,PTI)),(AJU,(FCA,(LYP,LLY))));	2
chrA1	14	36279495	36364163	0.84668	((PLE,(PUN,PTI)),(AJU,(FCA,(LYP,LLY))));	2
chrA1	12	36364202	38350024	19.8582	((PLE,(PUN,PTI)),((FCA,AJU),(LYP,LLY)));	1
chrA1	7	38350060	39210093	8.60033	((PLE,(PUN,PTI)),(AJU,(FCA,(LYP,LLY))));	2
chrA1	14	39210928	39797918	5.8699	((PLE,(PUN,PTI)),(FCA,(AJU,(LYP,LLY))));	3
chrA1	0	39797941	40260219	4.62278	((PLE,(PUN,PTI)),(AJU,(FCA,(LYP,LLY))));	2
chrA1	28	40260221	40264411	0.0419	((PTI,(PLE,PUN)),((FCA,AJU),(LYP,LLY)));	4
chrA1	14	40264859	40651712	3.86853	((PLE,(PUN,PTI)),(AJU,(FCA,(LYP,LLY))));	2
chrA1	24	40651744	40660626	0.08882	((PTI,(PLE,PUN)),(AJU,(FCA,(LYP,LLY))));	6
chrA1	14	40660657	40815494	1.54837	((PTI,(PLE,PUN)),((FCA,AJU),(LYP,LLY)));	4
chrA1	0	40815580	41296790	4.8121	((PLE,(PUN,PTI)),((FCA,AJU),(LYP,LLY)));	1
chrA1	28	41296953	41301034	0.04081	((PLE,(PUN,PTI)),((FCA,AJU),(LYP,LLY)));	1
chrA1	14	41301229	41643422	3.42193	((PLE,(PUN,PTI)),(AJU,(FCA,(LYP,LLY))));	2
chrA1	7	41643493	42292919	6.49426	((PLE,(PUN,PTI)),((FCA,AJU),(LYP,LLY)));	1
chrA1	14	42292929	42610587	3.17658	((PLE,(PUN,PTI)),(FCA,(AJU,(LYP,LLY))));	3
chrA1	0	42610598	43007644	3.97046	((PLE,(PUN,PTI)),((FCA,AJU),(LYP,LLY)));	1
chrA1	14	43007659	43154441	1.46782	((PLE,(PUN,PTI)),(AJU,(FCA,(LYP,LLY))));	2
chrA1	28	43154512	43162470	0.07958	((PLE,(PUN,PTI)),((FCA,AJU),(LYP,LLY)));	1
chrA1	26	43162593	43228810	0.66217	((PLE,(PUN,PTI)),(FCA,(AJU,(LYP,LLY))));	3
chrA1	14	43228857	44273356	10.445	((PLE,(PUN,PTI)),(AJU,(FCA,(LYP,LLY))));	2
chrA1	26	44273391	44292945	0.19554	((PLE,(PUN,PTI)),((FCA,AJU),(LYP,LLY)));	1
chrA1	7	44292956	44556619	2.63663	((PLE,(PUN,PTI)),(AJU,(FCA,(LYP,LLY))));	2
chrA1	26	44556716	44575557	0.18841	((PLE,(PUN,PTI)),(FCA,(AJU,(LYP,LLY))));	3
chrA1	19	44575641	44646318	0.70677	((PLE,(PUN,PTI)),(AJU,(FCA,(LYP,LLY))));	2
chrA1	0	44646657	44816210	1.69553	((PLE,(PUN,PTI)),(FCA,(AJU,(LYP,LLY))));	3
chrA1	19	44816769	44840343	0.23574	((PTI,(PLE,PUN)),(FCA,(AJU,(LYP,LLY))));	9
chrA1	12	44840412	45005987	1.65575	((PLE,(PUN,PTI)),(FCA,(AJU,(LYP,LLY))));	3
chrA1	24	45006164	45009022	0.02858	((PTI,(PLE,PUN)),((FCA,AJU),(LYP,LLY)));	4
chrA1	0	45009762	46031823	10.2206	((PLE,(PUN,PTI)),(FCA,(AJU,(LYP,LLY))));	3
chrA1	14	46031958	46186031	1.54073	((PLE,(PUN,PTI)),(FCA,(AJU,(LYP,LLY))));	3
chrA1	0	46186130	46517449	3.31319	((PLE,(PUN,PTI)),(FCA,(AJU,(LYP,LLY))));	3
chrA1	28	46517569	46526888	0.09319	((PLE,(PUN,PTI)),((FCA,AJU),(LYP,LLY)));	1
chrA1	14	46527154	46644777	1.17623	((PLE,(PUN,PTI)),(FCA,(AJU,(LYP,LLY))));	3
chrA1	0	46644931	47999549	13.5462	((PLE,(PUN,PTI)),((FCA,AJU),(LYP,LLY)));	1
chrA1	19	47999578	48037716	0.38138	((PLE,(PUN,PTI)),(AJU,(FCA,(LYP,LLY))));	2
chrA1	7	48037791	49840962	18.0317	((PLE,(PUN,PTI)),(FCA,(AJU,(LYP,LLY))));	3
chrA1	26	49841060	49882799	0.41739	((PLE,(PUN,PTI)),(FCA,(AJU,(LYP,LLY))));	3
chrA1	19	49882800	49897051	0.14251	((PLE,(PUN,PTI)),((FCA,AJU),(LYP,LLY)));	1
chrA1	0	49897063	50819309	9.22246	((PLE,(PUN,PTI)),(AJU,(FCA,(LYP,LLY))));	2
chrA1	26	50819391	50865056	0.45665	((PLE,(PUN,PTI)),((FCA,AJU),(LYP,LLY)));	1
chrA1	7	50865133	51491463	6.2633	((PLE,(PUN,PTI)),(AJU,(FCA,(LYP,LLY))));	2
chrA1	14	51491534	51800616	3.09082	((PLE,(PUN,PTI)),(FCA,(AJU,(LYP,LLY))));	3
chrA1	0	51800618	52403075	6.02457	((PLE,(PUN,PTI)),((FCA,AJU),(LYP,LLY)));	1
chrA1	12	52403102	52911991	5.08889	((PLE,(PUN,PTI)),(FCA,(AJU,(LYP,LLY))));	3
chrA1	14	52912088	53000086	0.87998	((PLE,(PUN,PTI)),(AJU,(FCA,(LYP,LLY))));	2
chrA1	12	53000100	53434709	4.34609	((PLE,(PUN,PTI)),(AJU,(FCA,(LYP,LLY))));	2
chrA1	13	53434740	53458159	0.23419	((PUN,(PLE,PTI)),(FCA,(AJU,(LYP,LLY))));	8
chrA1	12	53458219	53559443	1.01224	((PLE,(PUN,PTI)),(AJU,(FCA,(LYP,LLY))));	2
chrA1	14	53559512	54043897	4.84385	((PLE,(PUN,PTI)),(AJU,(FCA,(LYP,LLY))));	2
chrA1	7	54043958	54292256	2.48298	((PLE,(PUN,PTI)),(FCA,(AJU,(LYP,LLY))));	3
chrA1	28	54292263	54314582	0.22319	((PUN,(PLE,PTI)),((FCA,AJU),(LYP,LLY)));	5
chrA1	0	54314646	54946819	6.32173	((PLE,(PUN,PTI)),((FCA,AJU),(LYP,LLY)));	1
chrA1	19	54946830	54999256	0.52426	((PLE,(PUN,PTI)),((FCA,AJU),(LYP,LLY)));	1
chrA1	0	54999466	55506438	5.06972	((PLE,(PUN,PTI)),((FCA,AJU),(LYP,LLY)));	1
chrA1	19	55506444	55558561	0.52117	((PLE,(PUN,PTI)),(AJU,(FCA,(LYP,LLY))));	2
chrA1	0	55558591	55634581	0.7599	((PLE,(PUN,PTI)),((FCA,AJU),(LYP,LLY)));	1
chrA1	19	55634695	55663172	0.28477	((PLE,(PUN,PTI)),(AJU,(FCA,(LYP,LLY))));	2
chrA1	0	55663205	57407990	17.4478	((PLE,(PUN,PTI)),((FCA,AJU),(LYP,LLY)));	1
chrA1	14	57408030	58211589	8.03559	((PLE,(PUN,PTI)),((FCA,AJU),(LYP,LLY)));	1
chrA1	13	58211663	58216328	0.04665	((PUN,(PLE,PTI)),(AJU,(FCA,(LYP,LLY))));	7
chrA1	0	58216351	58501161	2.8481	((PTI,(PLE,PUN)),((FCA,AJU),(LYP,LLY)));	4
chrA1	19	58501171	58664771	1.636	((PLE,(PUN,PTI)),(AJU,(FCA,(LYP,LLY))));	2
chrA1	0	58664773	58769454	1.04681	((PLE,(PUN,PTI)),(AJU,(FCA,(LYP,LLY))));	2
chrA1	28	58769493	58792140	0.22647	((PTI,(PLE,PUN)),((FCA,AJU),(LYP,LLY)));	4
chrA1	14	58792318	59012792	2.20474	((PLE,(PUN,PTI)),(FCA,(AJU,(LYP,LLY))));	3
chrA1	12	59012895	59196548	1.83653	((PLE,(PUN,PTI)),((FCA,AJU),(LYP,LLY)));	1
chrA1	14	59198029	59367205	1.69176	((PLE,(PUN,PTI)),(AJU,(FCA,(LYP,LLY))));	2
chrA1	28	59367219	59382782	0.15563	((PUN,(PLE,PTI)),((FCA,AJU),(LYP,LLY)));	5
chrA1	19	59382792	59397853	0.15061	((PUN,(PLE,PTI)),(AJU,(FCA,(LYP,LLY))));	7
chrA1	28	59397856	59408950	0.11094	((PUN,(PLE,PTI)),((FCA,AJU),(LYP,LLY)));	5
chrA1	14	59409118	59498637	0.89519	((PLE,(PUN,PTI)),(AJU,(FCA,(LYP,LLY))));	2
chrA1	19	59498726	59584953	0.86227	((PLE,(PUN,PTI)),(FCA,(AJU,(LYP,LLY))));	3
chrA1	0	59584984	59747635	1.62651	((PLE,(PUN,PTI)),(AJU,(FCA,(LYP,LLY))));	2
chrA1	14	59747894	59874407	1.26513	((PLE,(PUN,PTI)),((FCA,AJU),(LYP,LLY)));	1
chrA1	28	59874437	59878742	0.04305	((PLE,(PUN,PTI)),((FCA,AJU),(LYP,LLY)));	1
chrA1	19	59878754	60036075	1.57321	((PLE,(PUN,PTI)),((FCA,AJU),(LYP,LLY)));	1
chrA1	14	60036142	60392206	3.56064	((PLE,(PUN,PTI)),(AJU,(FCA,(LYP,LLY))));	2
chrA1	26	60392208	60437095	0.44887	((PLE,(PUN,PTI)),((FCA,AJU),(LYP,LLY)));	1
chrA1	0	60437162	60901740	4.64578	((PLE,(PUN,PTI)),(AJU,(FCA,(LYP,LLY))));	2
chrA1	19	60901825	60949730	0.47905	((PLE,(PUN,PTI)),((FCA,AJU),(LYP,LLY)));	1
chrA1	28	60949757	60958774	0.09017	((PLE,(PUN,PTI)),((FCA,AJU),(LYP,LLY)));	1
chrA1	14	60958794	61941456	9.82662	((PLE,(PUN,PTI)),(AJU,(FCA,(LYP,LLY))));	2
chrA1	0	61941459	63219099	12.7764	((PLE,(PUN,PTI)),((FCA,AJU),(LYP,LLY)));	1
chrA1	14	63219108	63259239	0.40131	((PLE,(PUN,PTI)),(AJU,(FCA,(LYP,LLY))));	2
chrA1	7	63259284	64639897	13.8061	((PLE,(PUN,PTI)),(FCA,(AJU,(LYP,LLY))));	3
chrA1	14	64639925	64726832	0.86907	((PTI,(PLE,PUN)),(AJU,(FCA,(LYP,LLY))));	6
chrA1	0	64727043	64856356	1.29313	((PLE,(PUN,PTI)),(AJU,(FCA,(LYP,LLY))));	2
chrA1	26	64856367	64896720	0.40353	((PLE,(PUN,PTI)),(FCA,(AJU,(LYP,LLY))));	3
chrA1	7	64896951	65553834	6.56883	((PLE,(PUN,PTI)),(FCA,(AJU,(LYP,LLY))));	3
chrA1	28	65553900	65582091	0.28191	((PLE,(PUN,PTI)),((FCA,AJU),(LYP,LLY)));	1
chrA1	7	65584242	67342689	17.5845	((PLE,(PUN,PTI)),(AJU,(FCA,(LYP,LLY))));	2
chrA1	19	67342702	67431637	0.88935	((PLE,(PUN,PTI)),(FCA,(AJU,(LYP,LLY))));	3
chrA1	7	67431673	67968324	5.36651	((PLE,(PUN,PTI)),(FCA,(AJU,(LYP,LLY))));	3
chrA1	28	67968341	67974299	0.05958	((PLE,(PUN,PTI)),((FCA,AJU),(LYP,LLY)));	1
chrA1	19	67974335	67990622	0.16287	((PLE,(PUN,PTI)),((FCA,AJU),(LYP,LLY)));	1
chrA1	28	67990670	68002460	0.1179	((PTI,(PLE,PUN)),((FCA,AJU),(LYP,LLY)));	4
chrA1	19	68002584	68134397	1.31813	((PLE,(PUN,PTI)),(FCA,(AJU,(LYP,LLY))));	3
chrA1	7	68134406	69664690	15.3028	((PLE,(PUN,PTI)),(AJU,(FCA,(LYP,LLY))));	2
chrA1	28	69664722	69680823	0.16101	((PLE,(PUN,PTI)),((FCA,AJU),(LYP,LLY)));	1
chrA1	14	69680825	69761202	0.80377	((PLE,(PUN,PTI)),(FCA,(AJU,(LYP,LLY))));	3
chrA1	12	69761234	70220582	4.59348	((PLE,(PUN,PTI)),((FCA,AJU),(LYP,LLY)));	1
chrA1	28	70220583	70248101	0.27518	((PLE,(PUN,PTI)),((FCA,AJU),(LYP,LLY)));	1
chrA1	12	70248157	70907951	6.59794	((PLE,(PUN,PTI)),((FCA,AJU),(LYP,LLY)));	1
chrA1	14	70907955	71733510	8.25555	((PLE,(PUN,PTI)),((FCA,AJU),(LYP,LLY)));	1
chrA1	19	71733548	71809883	0.76335	((PLE,(PUN,PTI)),(FCA,(AJU,(LYP,LLY))));	3
chrA1	28	71809907	71817552	0.07645	((PTI,(PLE,PUN)),((FCA,AJU),(LYP,LLY)));	4
chrA1	19	71817607	71875115	0.57508	((PLE,(PUN,PTI)),(FCA,(AJU,(LYP,LLY))));	3
chrA1	12	71875218	71955369	0.80151	((PLE,(PUN,PTI)),((FCA,AJU),(LYP,LLY)));	1
chrA1	19	71955391	72087094	1.31703	((PLE,(PUN,PTI)),(FCA,(AJU,(LYP,LLY))));	3
chrA1	7	72087220	72695941	6.08721	((PLE,(PUN,PTI)),(AJU,(FCA,(LYP,LLY))));	2
chrA1	26	72695998	72842415	1.46417	((PLE,(PUN,PTI)),(AJU,(FCA,(LYP,LLY))));	2
chrA1	0	72842458	73410736	5.68278	((PLE,(PUN,PTI)),(AJU,(FCA,(LYP,LLY))));	2
chrA1	26	73410765	73456723	0.45958	((PLE,(PUN,PTI)),(AJU,(FCA,(LYP,LLY))));	2
chrA1	0	73456735	73725888	2.69153	((PLE,(PUN,PTI)),(AJU,(FCA,(LYP,LLY))));	2
chrA1	19	73725954	73785426	0.59472	((PUN,(PLE,PTI)),((FCA,AJU),(LYP,LLY)));	5
chrA1	12	73785463	78562712	47.7725	((PLE,(PUN,PTI)),((FCA,AJU),(LYP,LLY)));	1
chrA1	26	78562779	78633226	0.70447	((PLE,(PUN,PTI)),(FCA,(AJU,(LYP,LLY))));	3
chrA1	12	78633260	80981315	23.4806	((PLE,(PUN,PTI)),((FCA,AJU),(LYP,LLY)));	1
chrA1	14	80981371	81131949	1.50578	((PLE,(PUN,PTI)),(FCA,(AJU,(LYP,LLY))));	3
chrA1	12	81131954	81993128	8.61174	((PLE,(PUN,PTI)),((FCA,AJU),(LYP,LLY)));	1
chrA1	14	81993203	82083502	0.90299	((PLE,(PUN,PTI)),(AJU,(FCA,(LYP,LLY))));	2
chrA1	7	82083574	82208000	1.24426	((PLE,(PUN,PTI)),((FCA,AJU),(LYP,LLY)));	1
chrA1	19	82208064	82364592	1.56528	((PLE,(PUN,PTI)),(AJU,(FCA,(LYP,LLY))));	2
chrA1	12	82364631	82386870	0.22239	((PLE,(PUN,PTI)),((FCA,AJU),(LYP,LLY)));	1
chrA1	19	82386880	82444064	0.57184	((PLE,(PUN,PTI)),(FCA,(AJU,(LYP,LLY))));	3
chrA1	14	82444065	82773054	3.28989	((PLE,(PUN,PTI)),((FCA,AJU),(LYP,LLY)));	1
chrA1	12	82773084	82807916	0.34832	((PLE,(PUN,PTI)),(FCA,(AJU,(LYP,LLY))));	3
chrA1	19	82808701	83582368	7.73667	((PLE,(PUN,PTI)),(AJU,(FCA,(LYP,LLY))));	2
chrA1	0	83582451	84381896	7.99445	((PLE,(PUN,PTI)),(FCA,(AJU,(LYP,LLY))));	3
chrA1	19	84381965	84826018	4.44053	((PLE,(PUN,PTI)),(AJU,(FCA,(LYP,LLY))));	2
chrA1	7	84826046	85478231	6.52185	((PUN,(PLE,PTI)),(AJU,(FCA,(LYP,LLY))));	7
chrA1	26	85478242	85523416	0.45174	((PLE,(PUN,PTI)),(AJU,(FCA,(LYP,LLY))));	2
chrA1	19	85523429	85789614	2.66185	((PLE,(PUN,PTI)),(AJU,(FCA,(LYP,LLY))));	2
chrA1	0	85789748	86097309	3.07561	((PLE,(PUN,PTI)),(AJU,(FCA,(LYP,LLY))));	2
chrA1	19	86097554	86100144	0.0259	((PLE,(PUN,PTI)),(FCA,(AJU,(LYP,LLY))));	3
chrA1	14	86197712	86396114	1.98402	((PLE,(PUN,PTI)),(FCA,(AJU,(LYP,LLY))));	3
chrA1	26	86399762	86474338	0.74576	((PLE,(PUN,PTI)),(FCA,(AJU,(LYP,LLY))));	3
chrA1	12	86492854	86541330	0.48476	((PLE,(PUN,PTI)),((FCA,AJU),(LYP,LLY)));	1
chrA1	19	86541402	86620359	0.78957	((PLE,(PUN,PTI)),(AJU,(FCA,(LYP,LLY))));	2
chrA1	34	86635296	86728034	0.92738	((PUN,(PLE,PTI)),(AJU,(FCA,(LYP,LLY))));	7
chrA1	14	86789663	86925959	1.36296	((PTI,(PLE,PUN)),((FCA,AJU),(LYP,LLY)));	4
chrA1	28	86926634	86937511	0.10877	((PUN,(PLE,PTI)),((FCA,AJU),(LYP,LLY)));	5
chrA1	19	86937531	87033607	0.96076	((PUN,(PLE,PTI)),((FCA,AJU),(LYP,LLY)));	5
chrA1	12	87033780	87116775	0.82995	((PLE,(PUN,PTI)),((FCA,AJU),(LYP,LLY)));	1
chrA1	19	87117855	87204650	0.86795	((PUN,(PLE,PTI)),(AJU,(FCA,(LYP,LLY))));	7
chrA1	26	87204692	87337246	1.32554	((PLE,(PUN,PTI)),(AJU,(FCA,(LYP,LLY))));	2
chrA1	0	87337538	87593705	2.56167	((PLE,(PUN,PTI)),(AJU,(FCA,(LYP,LLY))));	2
chrA1	26	87593842	87602213	0.08371	((PLE,(PUN,PTI)),((FCA,AJU),(LYP,LLY)));	1
chrA1	14	87605429	87774390	1.68961	((PLE,(PUN,PTI)),(FCA,(AJU,(LYP,LLY))));	3
chrA1	13	87774453	87777809	0.03356	((PUN,(PLE,PTI)),(AJU,(FCA,(LYP,LLY))));	7
chrA1	14	87777954	87957021	1.79067	((PLE,(PUN,PTI)),(AJU,(FCA,(LYP,LLY))));	2
chrA1	26	87957048	88069386	1.12338	((PLE,(PUN,PTI)),(FCA,(AJU,(LYP,LLY))));	3
chrA1	19	88069401	88752422	6.83021	((PLE,(PUN,PTI)),(AJU,(FCA,(LYP,LLY))));	2
chrA1	12	88752451	88894841	1.4239	((PLE,(PUN,PTI)),((FCA,AJU),(LYP,LLY)));	1
chrA1	6	88894913	88917848	0.22935	((PUN,(PLE,PTI)),((FCA,AJU),(LYP,LLY)));	11
chrA1	8	88918195	88922926	0.04731	((PLE,(PUN,PTI)),(AJU,(FCA,(LYP,LLY))));	20
chrA1	7	88923262	89047199	1.23937	((PLE,(PUN,PTI)),((FCA,AJU),(LYP,LLY)));	1
chrA1	1	89047207	89074218	0.27011	((PLE,(PUN,PTI)),(AJU,(FCA,(LYP,LLY))));	61
chrA1	34	89074227	89091177	0.1695	((PLE,(PUN,PTI)),(AJU,(FCA,(LYP,LLY))));	15
chrA1	24	89091413	89119804	0.28391	((PTI,(PLE,PUN)),(AJU,(FCA,(LYP,LLY))));	6
chrA1	11	89119884	89129806	0.09922	((PTI,(PLE,PUN)),(AJU,(FCA,(LYP,LLY))));	6
chrA1	1	89130184	89133289	0.03105	((PLE,(PUN,PTI)),((FCA,AJU),(LYP,LLY)));	28
chrA1	24	89133323	89143259	0.09936	((PLE,(PUN,PTI)),(FCA,(AJU,(LYP,LLY))));	54
chrA1	28	89149989	89198456	0.48467	((PLE,(PUN,PTI)),(FCA,(AJU,(LYP,LLY))));	51
chrA1	19	89198562	89207207	0.08645	((PTI,(PLE,PUN)),(AJU,(FCA,(LYP,LLY))));	6
chrA1	13	89207239	89208732	0.01493	((PLE,(PUN,PTI)),((FCA,AJU),(LYP,LLY)));	42
chrA1	11	89208811	89285860	0.77049	((PLE,(PUN,PTI)),((FCA,AJU),(LYP,LLY)));	28
chrA1	28	89285935	89345538	0.59603	((PUN,(PLE,PTI)),(AJU,(FCA,(LYP,LLY))));	7
chrA1	14	89345791	90182174	8.36383	((PLE,(PUN,PTI)),(AJU,(FCA,(LYP,LLY))));	2
chrA1	0	90182189	90514703	3.32514	((PLE,(PUN,PTI)),(AJU,(FCA,(LYP,LLY))));	2
chrA1	14	90514706	90740837	2.26131	((PLE,(PUN,PTI)),(AJU,(FCA,(LYP,LLY))));	2
chrA1	19	90740853	91034450	2.93597	((PLE,(PUN,PTI)),(AJU,(FCA,(LYP,LLY))));	2
chrA1	0	91034491	91240064	2.05573	((PLE,(PUN,PTI)),(FCA,(AJU,(LYP,LLY))));	3
chrA1	19	91240171	91333018	0.92847	((PLE,(PUN,PTI)),(FCA,(AJU,(LYP,LLY))));	3
chrA1	7	91333056	92376041	10.4299	((PLE,(PUN,PTI)),((FCA,AJU),(LYP,LLY)));	1
chrA1	14	92376474	92599066	2.22592	((PUN,(PLE,PTI)),((FCA,AJU),(LYP,LLY)));	5
chrA1	0	92599246	92811724	2.12478	((PLE,(PUN,PTI)),((FCA,AJU),(LYP,LLY)));	1
chrA1	19	92811748	92835876	0.24128	((PTI,(PLE,PUN)),(AJU,(FCA,(LYP,LLY))));	6
chrA1	12	92835878	93257433	4.21555	((PLE,(PUN,PTI)),((FCA,AJU),(LYP,LLY)));	1
chrA1	0	93257821	93509874	2.52053	((PLE,(PUN,PTI)),((FCA,AJU),(LYP,LLY)));	1
chrA1	14	93509966	93727641	2.17675	((PLE,(PUN,PTI)),(FCA,(AJU,(LYP,LLY))));	3
chrA1	12	93727753	97042533	33.1478	((PLE,(PUN,PTI)),((FCA,AJU),(LYP,LLY)));	1
chrA1	14	97042553	97104321	0.61768	((PLE,(PUN,PTI)),(FCA,(AJU,(LYP,LLY))));	3
chrA1	26	97104341	97144268	0.39927	((PLE,(PUN,PTI)),(AJU,(FCA,(LYP,LLY))));	2
chrA1	12	97144308	97645018	5.0071	((PLE,(PUN,PTI)),((FCA,AJU),(LYP,LLY)));	1
chrA1	14	97645157	97848176	2.03019	((PLE,(PUN,PTI)),((FCA,AJU),(LYP,LLY)));	1
chrA1	28	97848264	97857756	0.09492	((PLE,(PUN,PTI)),((FCA,AJU),(LYP,LLY)));	1
chrA1	19	97858007	97977794	1.19787	((PLE,(PUN,PTI)),(FCA,(AJU,(LYP,LLY))));	3
chrA1	0	97978052	99720080	17.4203	((PLE,(PUN,PTI)),((FCA,AJU),(LYP,LLY)));	1
chrA1	26	99720175	99738610	0.18435	((PLE,(PUN,PTI)),(FCA,(AJU,(LYP,LLY))));	3
chrA1	12	99739048	100367116	6.28068	((PLE,(PUN,PTI)),((FCA,AJU),(LYP,LLY)));	1
chrA1	19	100367118	100501176	1.34058	((PLE,(PUN,PTI)),(FCA,(AJU,(LYP,LLY))));	3
chrA1	12	100501327	102126989	16.2566	((PLE,(PUN,PTI)),(AJU,(FCA,(LYP,LLY))));	2
chrA1	24	102127009	102128014	0.01005	((PTI,(PLE,PUN)),(AJU,(FCA,(LYP,LLY))));	6
chrA1	12	102128053	102866826	7.38773	((PLE,(PUN,PTI)),((FCA,AJU),(LYP,LLY)));	1
chrA1	19	102866863	102891382	0.24519	((PLE,(PUN,PTI)),((FCA,AJU),(LYP,LLY)));	1
chrA1	7	102891387	103906852	10.1547	((PLE,(PUN,PTI)),((FCA,AJU),(LYP,LLY)));	1
chrA1	12	103906911	104594842	6.87931	((PLE,(PUN,PTI)),((FCA,AJU),(LYP,LLY)));	1
chrA1	7	104594871	105257519	6.62648	((PLE,(PUN,PTI)),((FCA,AJU),(LYP,LLY)));	1
chrA1	28	105257612	105261982	0.0437	((PUN,(PLE,PTI)),((FCA,AJU),(LYP,LLY)));	5
chrA1	0	105262038	105642545	3.80507	((PLE,(PUN,PTI)),(AJU,(FCA,(LYP,LLY))));	2
chrA1	26	105642615	105684307	0.41692	((PLE,(PUN,PTI)),((FCA,AJU),(LYP,LLY)));	1
chrA1	14	105684447	105779488	0.95041	((PLE,(PUN,PTI)),(FCA,(AJU,(LYP,LLY))));	3
chrA1	0	105779527	107388973	16.0945	((PUN,(PLE,PTI)),(FCA,(AJU,(LYP,LLY))));	8
chrA1	19	107389005	107434174	0.45169	((PTI,(PLE,PUN)),(FCA,(AJU,(LYP,LLY))));	9
chrA1	7	107434220	107964369	5.30149	((PLE,(PUN,PTI)),((FCA,AJU),(LYP,LLY)));	1
chrA1	24	107964378	107967299	0.02921	((PTI,(PLE,PUN)),(FCA,(AJU,(LYP,LLY))));	9
chrA1	7	107967343	108468514	5.01171	((PLE,(PUN,PTI)),(FCA,(AJU,(LYP,LLY))));	3
chrA1	14	108468549	110231097	17.6255	((PLE,(PUN,PTI)),(FCA,(AJU,(LYP,LLY))));	3
chrA1	7	110231114	111020993	7.89879	((PLE,(PUN,PTI)),((FCA,AJU),(LYP,LLY)));	1
chrA1	13	111021036	111024712	0.03676	((PUN,(PLE,PTI)),(AJU,(FCA,(LYP,LLY))));	7
chrA1	14	111025116	112003605	9.78489	((PLE,(PUN,PTI)),(AJU,(FCA,(LYP,LLY))));	2
chrA1	7	112003620	112892835	8.89215	((PLE,(PUN,PTI)),(AJU,(FCA,(LYP,LLY))));	2
chrA1	19	112893001	112925663	0.32662	((PTI,(PLE,PUN)),(AJU,(FCA,(LYP,LLY))));	6
chrA1	28	112925679	112933531	0.07852	((PTI,(PLE,PUN)),((FCA,AJU),(LYP,LLY)));	4
chrA1	12	112933670	113455141	5.21471	((PLE,(PUN,PTI)),(AJU,(FCA,(LYP,LLY))));	2
chrA1	7	113455360	114354020	8.9866	((PLE,(PUN,PTI)),(AJU,(FCA,(LYP,LLY))));	2
chrA1	14	114354039	116154608	18.0057	((PLE,(PUN,PTI)),(AJU,(FCA,(LYP,LLY))));	2
chrA1	24	116154735	116156892	0.02157	((PTI,(PLE,PUN)),((FCA,AJU),(LYP,LLY)));	4
chrA1	14	116157126	118119954	19.6283	((PLE,(PUN,PTI)),(AJU,(FCA,(LYP,LLY))));	2
chrA1	13	118119985	118123127	0.03142	((PUN,(PLE,PTI)),(AJU,(FCA,(LYP,LLY))));	7
chrA1	19	118123151	118141719	0.18568	((PLE,(PUN,PTI)),(AJU,(FCA,(LYP,LLY))));	2
chrA1	0	118141934	118226348	0.84414	((PLE,(PUN,PTI)),(AJU,(FCA,(LYP,LLY))));	2
chrA1	28	118226427	118240435	0.14008	((PUN,(PLE,PTI)),((FCA,AJU),(LYP,LLY)));	5
chrA1	7	118241969	118867881	6.25912	((PLE,(PUN,PTI)),((FCA,AJU),(LYP,LLY)));	1
chrA1	19	118867885	118936622	0.68737	((PTI,(PLE,PUN)),((FCA,AJU),(LYP,LLY)));	4
chrA1	12	118936659	118967963	0.31304	((PTI,(PLE,PUN)),((FCA,AJU),(LYP,LLY)));	4
chrA1	28	118968012	118973454	0.05442	((PUN,(PLE,PTI)),((FCA,AJU),(LYP,LLY)));	5
chrA1	14	118973919	119331868	3.57949	((PLE,(PUN,PTI)),(AJU,(FCA,(LYP,LLY))));	2
chrA1	7	119331883	119917850	5.85967	((PLE,(PUN,PTI)),((FCA,AJU),(LYP,LLY)));	1
chrA1	14	119919680	120159055	2.39375	((PLE,(PUN,PTI)),(AJU,(FCA,(LYP,LLY))));	2
chrA1	0	120159126	122303670	21.4454	((PLE,(PUN,PTI)),(AJU,(FCA,(LYP,LLY))));	2
chrA1	26	122303691	122351790	0.48099	((PLE,(PUN,PTI)),(FCA,(AJU,(LYP,LLY))));	3
chrA1	0	122352014	122589539	2.37525	((PLE,(PUN,PTI)),((FCA,AJU),(LYP,LLY)));	1
chrA1	12	122589807	123161703	5.71896	((PLE,(PUN,PTI)),((FCA,AJU),(LYP,LLY)));	1
chrA1	13	123161727	123163089	0.01362	((PUN,(PLE,PTI)),(AJU,(FCA,(LYP,LLY))));	7
chrA1	0	123163115	123914022	7.50907	((PLE,(PUN,PTI)),((FCA,AJU),(LYP,LLY)));	1
chrA1	28	123914037	123927592	0.13555	((PTI,(PLE,PUN)),((FCA,AJU),(LYP,LLY)));	4
chrA1	14	123927624	124022150	0.94526	((PLE,(PUN,PTI)),(AJU,(FCA,(LYP,LLY))));	2
chrA1	28	124022172	124065611	0.43439	((PLE,(PUN,PTI)),((FCA,AJU),(LYP,LLY)));	1
chrA1	14	124065688	124365532	2.99844	((PLE,(PUN,PTI)),(FCA,(AJU,(LYP,LLY))));	3
chrA1	19	124365615	124747281	3.81666	((PLE,(PUN,PTI)),((FCA,AJU),(LYP,LLY)));	1
chrA1	14	124747329	125005288	2.57959	((PLE,(PUN,PTI)),((FCA,AJU),(LYP,LLY)));	1
chrA1	19	125005307	125116345	1.11038	((PLE,(PUN,PTI)),((FCA,AJU),(LYP,LLY)));	1
chrA1	14	125116756	126045960	9.29204	((PLE,(PUN,PTI)),(AJU,(FCA,(LYP,LLY))));	2
chrA1	0	126045968	126459568	4.136	((PLE,(PUN,PTI)),((FCA,AJU),(LYP,LLY)));	1
chrA1	13	126459596	126470380	0.10784	((PUN,(PLE,PTI)),(AJU,(FCA,(LYP,LLY))));	7
chrA1	0	126470431	127328810	8.58379	((PLE,(PUN,PTI)),(AJU,(FCA,(LYP,LLY))));	2
chrA1	19	127328884	127396864	0.6798	((PTI,(PLE,PUN)),(AJU,(FCA,(LYP,LLY))));	6
chrA1	0	127396914	128479645	10.8273	((PLE,(PUN,PTI)),((FCA,AJU),(LYP,LLY)));	1
chrA1	19	128479653	128509477	0.29824	((PLE,(PUN,PTI)),((FCA,AJU),(LYP,LLY)));	1
chrA1	7	128509564	129414230	9.04666	((PLE,(PUN,PTI)),((FCA,AJU),(LYP,LLY)));	1
chrA1	14	129414240	129756855	3.42615	((PLE,(PUN,PTI)),(AJU,(FCA,(LYP,LLY))));	2
chrA1	0	129757012	130292620	5.35608	((PLE,(PUN,PTI)),((FCA,AJU),(LYP,LLY)));	1
chrA1	19	130292633	130439755	1.47122	((PLE,(PUN,PTI)),(AJU,(FCA,(LYP,LLY))));	2
chrA1	26	130439759	130474025	0.34266	((PLE,(PUN,PTI)),((FCA,AJU),(LYP,LLY)));	1
chrA1	19	130474141	130491808	0.17667	((PTI,(PLE,PUN)),(AJU,(FCA,(LYP,LLY))));	6
chrA1	0	130491839	130698109	2.0627	((PLE,(PUN,PTI)),((FCA,AJU),(LYP,LLY)));	1
chrA1	13	130698127	130701282	0.03155	((PUN,(PLE,PTI)),((FCA,AJU),(LYP,LLY)));	5
chrA1	12	130701286	131494278	7.92992	((PLE,(PUN,PTI)),(AJU,(FCA,(LYP,LLY))));	2
chrA1	26	131494300	131575575	0.81275	((PLE,(PUN,PTI)),(FCA,(AJU,(LYP,LLY))));	3
chrA1	12	131575595	131880386	3.04791	((PLE,(PUN,PTI)),((FCA,AJU),(LYP,LLY)));	1
chrA1	14	131881230	131970446	0.89216	((PLE,(PUN,PTI)),(AJU,(FCA,(LYP,LLY))));	2
chrA1	12	131970532	132307188	3.36656	((PLE,(PUN,PTI)),((FCA,AJU),(LYP,LLY)));	1
chrA1	19	132307197	132385086	0.77889	((PLE,(PUN,PTI)),(AJU,(FCA,(LYP,LLY))));	2
chrA1	0	132385233	132805092	4.19859	((PUN,(PLE,PTI)),(FCA,(AJU,(LYP,LLY))));	8
chrA1	14	132805128	133096671	2.91543	((PUN,(PLE,PTI)),(AJU,(FCA,(LYP,LLY))));	7
chrA1	12	133097252	133243921	1.46669	((PLE,(PUN,PTI)),((FCA,AJU),(LYP,LLY)));	1
chrA1	14	133244093	133732930	4.88837	((PLE,(PUN,PTI)),(FCA,(AJU,(LYP,LLY))));	3
chrA1	26	133732939	133829186	0.96247	((PLE,(PUN,PTI)),((FCA,AJU),(LYP,LLY)));	1
chrA1	0	133830383	135355813	15.2543	((PLE,(PUN,PTI)),(AJU,(FCA,(LYP,LLY))));	2
chrA1	14	135355892	135432043	0.76151	((PLE,(PUN,PTI)),(AJU,(FCA,(LYP,LLY))));	2
chrA1	0	135432073	137805845	23.7377	((PLE,(PUN,PTI)),(FCA,(AJU,(LYP,LLY))));	3
chrA1	28	137806204	137813209	0.07005	((PLE,(PUN,PTI)),((FCA,AJU),(LYP,LLY)));	1
chrA1	14	137813245	138146685	3.3344	((PLE,(PUN,PTI)),(AJU,(FCA,(LYP,LLY))));	2
chrA1	7	138146693	138601389	4.54696	((PLE,(PUN,PTI)),((FCA,AJU),(LYP,LLY)));	1
chrA1	12	138601466	139961429	13.5996	((PLE,(PUN,PTI)),((FCA,AJU),(LYP,LLY)));	1
chrA1	14	139961432	140046756	0.85324	((PTI,(PLE,PUN)),(AJU,(FCA,(LYP,LLY))));	6
chrA1	28	140046878	140063875	0.16997	((PLE,(PUN,PTI)),((FCA,AJU),(LYP,LLY)));	1
chrA1	26	140063880	140113993	0.50113	((PLE,(PUN,PTI)),(AJU,(FCA,(LYP,LLY))));	2
chrA1	14	140114083	140214447	1.00364	((PLE,(PUN,PTI)),(AJU,(FCA,(LYP,LLY))));	2
chrA1	19	140214460	140356321	1.41861	((PLE,(PUN,PTI)),(FCA,(AJU,(LYP,LLY))));	3
chrA1	12	140356358	140423796	0.67438	((PLE,(PUN,PTI)),(AJU,(FCA,(LYP,LLY))));	2
chrA1	19	140423901	140466520	0.42619	((PLE,(PUN,PTI)),(AJU,(FCA,(LYP,LLY))));	2
chrA1	12	140467531	140910682	4.43151	((PLE,(PUN,PTI)),((FCA,AJU),(LYP,LLY)));	1
chrA1	7	140910735	141965086	10.5435	((PLE,(PUN,PTI)),((FCA,AJU),(LYP,LLY)));	1
chrA1	19	141965131	141980866	0.15735	((PTI,(PLE,PUN)),(FCA,(AJU,(LYP,LLY))));	9
chrA1	26	141980872	142040805	0.59933	((PLE,(PUN,PTI)),(FCA,(AJU,(LYP,LLY))));	3
chrA1	0	142040823	142851138	8.10315	((PLE,(PUN,PTI)),((FCA,AJU),(LYP,LLY)));	1
chrA1	14	142851146	142960603	1.09457	((PLE,(PUN,PTI)),(AJU,(FCA,(LYP,LLY))));	2
chrA1	12	142960728	143520549	5.59821	((PLE,(PUN,PTI)),((FCA,AJU),(LYP,LLY)));	1
chrA1	0	143520580	143810782	2.90202	((PLE,(PUN,PTI)),(AJU,(FCA,(LYP,LLY))));	2
chrA1	28	143811468	143820333	0.08865	((PLE,(PUN,PTI)),((FCA,AJU),(LYP,LLY)));	1
chrA1	26	143820335	143840135	0.198	((PLE,(PUN,PTI)),((FCA,AJU),(LYP,LLY)));	1
chrA1	0	143840157	145822894	19.8274	((PLE,(PUN,PTI)),(AJU,(FCA,(LYP,LLY))));	2
chrA1	14	145822909	146267377	4.44468	((PLE,(PUN,PTI)),(AJU,(FCA,(LYP,LLY))));	2
chrA1	0	146267487	148370743	21.0326	((PLE,(PUN,PTI)),((FCA,AJU),(LYP,LLY)));	1
chrA1	14	148370852	148700739	3.29887	((PLE,(PUN,PTI)),(FCA,(AJU,(LYP,LLY))));	3
chrA1	0	148700869	148999211	2.98342	((PLE,(PUN,PTI)),((FCA,AJU),(LYP,LLY)));	1
chrA1	14	148999243	149082779	0.83536	((PLE,(PUN,PTI)),(AJU,(FCA,(LYP,LLY))));	2
chrA1	0	149082889	149407701	3.24812	((PLE,(PUN,PTI)),((FCA,AJU),(LYP,LLY)));	1
chrA1	26	149407990	149440677	0.32687	((PLE,(PUN,PTI)),(AJU,(FCA,(LYP,LLY))));	2
chrA1	0	149440746	149692667	2.51921	((PLE,(PUN,PTI)),(AJU,(FCA,(LYP,LLY))));	2
chrA1	13	149692686	149701213	0.08527	((PUN,(PLE,PTI)),(AJU,(FCA,(LYP,LLY))));	7
chrA1	19	149701268	149727028	0.2576	((PUN,(PLE,PTI)),(FCA,(AJU,(LYP,LLY))));	8
chrA1	13	149727324	149730072	0.02748	((PUN,(PLE,PTI)),(FCA,(AJU,(LYP,LLY))));	8
chrA1	0	149730531	150106167	3.75636	((PLE,(PUN,PTI)),(AJU,(FCA,(LYP,LLY))));	2
chrA1	19	150106173	150145232	0.39059	((PLE,(PUN,PTI)),(AJU,(FCA,(LYP,LLY))));	2
chrA1	12	150145267	150385249	2.39982	((PLE,(PUN,PTI)),((FCA,AJU),(LYP,LLY)));	1
chrA1	14	150385306	150518485	1.33179	((PLE,(PUN,PTI)),(AJU,(FCA,(LYP,LLY))));	2
chrA1	19	150518788	150597116	0.78328	((PLE,(PUN,PTI)),(AJU,(FCA,(LYP,LLY))));	2
chrA1	0	150597132	150757380	1.60248	((PLE,(PUN,PTI)),(AJU,(FCA,(LYP,LLY))));	2
chrA1	26	150757405	150858363	1.00958	((PLE,(PUN,PTI)),(FCA,(AJU,(LYP,LLY))));	3
chrA1	0	150858433	151248130	3.89697	((PLE,(PUN,PTI)),(AJU,(FCA,(LYP,LLY))));	2
chrA1	14	151248738	152688291	14.3955	((PLE,(PUN,PTI)),(AJU,(FCA,(LYP,LLY))));	2
chrA1	0	152688327	154698278	20.0995	((PLE,(PUN,PTI)),((FCA,AJU),(LYP,LLY)));	1
chrA1	19	154698293	154761345	0.63052	((PLE,(PUN,PTI)),(FCA,(AJU,(LYP,LLY))));	3
chrA1	0	154761607	155092260	3.30653	((PLE,(PUN,PTI)),(AJU,(FCA,(LYP,LLY))));	2
chrA1	19	155092277	155141594	0.49317	((PLE,(PUN,PTI)),(AJU,(FCA,(LYP,LLY))));	2
chrA1	0	155141686	156128408	9.86722	((PLE,(PUN,PTI)),(AJU,(FCA,(LYP,LLY))));	2
chrA1	14	156128420	156738628	6.10208	((PLE,(PUN,PTI)),(AJU,(FCA,(LYP,LLY))));	2
chrA1	0	156738710	157018104	2.79394	((PLE,(PUN,PTI)),((FCA,AJU),(LYP,LLY)));	1
chrA1	14	157018348	157266192	2.47844	((PLE,(PUN,PTI)),((FCA,AJU),(LYP,LLY)));	1
chrA1	12	157266227	157791030	5.24803	((PLE,(PUN,PTI)),((FCA,AJU),(LYP,LLY)));	1
chrA1	24	157791100	157794309	0.03209	((PTI,(PLE,PUN)),(AJU,(FCA,(LYP,LLY))));	6
chrA1	7	157797958	158078248	2.8029	((PLE,(PUN,PTI)),((FCA,AJU),(LYP,LLY)));	1
chrA1	14	158078347	158930617	8.5227	((PLE,(PUN,PTI)),(AJU,(FCA,(LYP,LLY))));	2
chrA1	19	158930814	158984357	0.53543	((PLE,(PUN,PTI)),(AJU,(FCA,(LYP,LLY))));	2
chrA1	0	158984476	159109506	1.2503	((PUN,(PLE,PTI)),(FCA,(AJU,(LYP,LLY))));	8
chrA1	14	159109932	159690951	5.81019	((PUN,(PLE,PTI)),((FCA,AJU),(LYP,LLY)));	5
chrA1	28	159691048	159712154	0.21106	((PLE,(PUN,PTI)),((FCA,AJU),(LYP,LLY)));	1
chrA1	14	159712391	159815262	1.02871	((PTI,(PLE,PUN)),(FCA,(AJU,(LYP,LLY))));	9
chrA1	28	159815392	159826299	0.10907	((PTI,(PLE,PUN)),((FCA,AJU),(LYP,LLY)));	4
chrA1	19	159826433	159918567	0.92134	((PTI,(PLE,PUN)),(AJU,(FCA,(LYP,LLY))));	6
chrA1	0	159918819	162232609	23.1379	((PLE,(PUN,PTI)),(FCA,(AJU,(LYP,LLY))));	3
chrA1	13	162232727	162238508	0.05781	((PUN,(PLE,PTI)),(FCA,(AJU,(LYP,LLY))));	8
chrA1	14	162238667	162617998	3.79331	((PLE,(PUN,PTI)),(AJU,(FCA,(LYP,LLY))));	2
chrA1	0	162618092	164155679	15.3759	((PLE,(PUN,PTI)),((FCA,AJU),(LYP,LLY)));	1
chrA1	14	164156822	164256545	0.99723	((PUN,(PLE,PTI)),(AJU,(FCA,(LYP,LLY))));	7
chrA1	0	164256781	164592802	3.36021	((PLE,(PUN,PTI)),(AJU,(FCA,(LYP,LLY))));	2
chrA1	14	164592812	165545179	9.52367	((PLE,(PUN,PTI)),(AJU,(FCA,(LYP,LLY))));	2
chrA1	0	165545321	165871558	3.26237	((PLE,(PUN,PTI)),(AJU,(FCA,(LYP,LLY))));	2
chrA1	14	165871597	166442038	5.70441	((PLE,(PUN,PTI)),(AJU,(FCA,(LYP,LLY))));	2
chrA1	0	166442047	166655428	2.13381	((PTI,(PLE,PUN)),(AJU,(FCA,(LYP,LLY))));	6
chrA1	14	166655461	166786131	1.3067	((PLE,(PUN,PTI)),(AJU,(FCA,(LYP,LLY))));	2
chrA1	26	166786350	166813445	0.27095	((PLE,(PUN,PTI)),(AJU,(FCA,(LYP,LLY))));	2
chrA1	14	166813461	166947467	1.34006	((PLE,(PUN,PTI)),(AJU,(FCA,(LYP,LLY))));	2
chrA1	19	166947524	167036805	0.89281	((PLE,(PUN,PTI)),((FCA,AJU),(LYP,LLY)));	1
chrA1	28	167036905	167046841	0.09936	((PLE,(PUN,PTI)),((FCA,AJU),(LYP,LLY)));	1
chrA1	0	167046891	167400744	3.53853	((PLE,(PUN,PTI)),((FCA,AJU),(LYP,LLY)));	1
chrA1	19	167401058	167472168	0.7111	((PLE,(PUN,PTI)),(FCA,(AJU,(LYP,LLY))));	3
chrA1	0	167472207	167904169	4.31962	((PLE,(PUN,PTI)),((FCA,AJU),(LYP,LLY)));	1
chrA1	14	167904385	168384050	4.79665	((PLE,(PUN,PTI)),(FCA,(AJU,(LYP,LLY))));	3
chrA1	0	168384178	168697369	3.13191	((PLE,(PUN,PTI)),((FCA,AJU),(LYP,LLY)));	1
chrA1	14	168697569	169198665	5.01096	((PLE,(PUN,PTI)),(AJU,(FCA,(LYP,LLY))));	2
chrA1	28	169198836	169213544	0.14708	((PUN,(PLE,PTI)),((FCA,AJU),(LYP,LLY)));	5
chrA1	0	169213583	170131635	9.18052	((PLE,(PUN,PTI)),(FCA,(AJU,(LYP,LLY))));	3
chrA1	19	170131698	170205511	0.73813	((PUN,(PLE,PTI)),(AJU,(FCA,(LYP,LLY))));	7
chrA1	28	170205535	170217497	0.11962	((PUN,(PLE,PTI)),((FCA,AJU),(LYP,LLY)));	5
chrA1	14	170217523	170353390	1.35867	((PTI,(PLE,PUN)),(AJU,(FCA,(LYP,LLY))));	6
chrA1	0	170353514	171819190	14.6568	((PLE,(PUN,PTI)),(AJU,(FCA,(LYP,LLY))));	2
chrA1	14	171819353	171914022	0.94669	((PLE,(PUN,PTI)),(FCA,(AJU,(LYP,LLY))));	3
chrA1	7	171915012	173405525	14.9051	((PLE,(PUN,PTI)),((FCA,AJU),(LYP,LLY)));	1
chrA1	14	173405577	174130707	7.2513	((PUN,(PLE,PTI)),(FCA,(AJU,(LYP,LLY))));	8
chrA1	12	174130762	174341857	2.11095	((PLE,(PUN,PTI)),(AJU,(FCA,(LYP,LLY))));	2
chrA1	14	174341941	174439036	0.97095	((PTI,(PLE,PUN)),(FCA,(AJU,(LYP,LLY))));	9
chrA1	12	174439037	177905061	34.6602	((PLE,(PUN,PTI)),(AJU,(FCA,(LYP,LLY))));	2
chrA1	19	177905105	177941989	0.36884	((PLE,(PUN,PTI)),(AJU,(FCA,(LYP,LLY))));	2
chrA1	12	177942000	178330934	3.88934	((PLE,(PUN,PTI)),(AJU,(FCA,(LYP,LLY))));	2
chrA1	26	178331161	178377417	0.46256	((PLE,(PUN,PTI)),(FCA,(AJU,(LYP,LLY))));	3
chrA1	0	178377529	179526542	11.4901	((PLE,(PUN,PTI)),(FCA,(AJU,(LYP,LLY))));	3
chrA1	28	179526726	179536703	0.09977	((PLE,(PUN,PTI)),((FCA,AJU),(LYP,LLY)));	1
chrA1	7	179536790	179958094	4.21304	((PLE,(PUN,PTI)),(FCA,(AJU,(LYP,LLY))));	3
chrA1	24	179958151	179965017	0.06866	((PTI,(PLE,PUN)),(AJU,(FCA,(LYP,LLY))));	6
chrA1	14	179965033	180850149	8.85116	((PLE,(PUN,PTI)),(AJU,(FCA,(LYP,LLY))));	2
chrA1	26	180850189	180881167	0.30978	((PLE,(PUN,PTI)),((FCA,AJU),(LYP,LLY)));	1
chrA1	14	180881284	183904134	30.2285	((PLE,(PUN,PTI)),(AJU,(FCA,(LYP,LLY))));	2
chrA1	0	183905905	185025557	11.1965	((PLE,(PUN,PTI)),(AJU,(FCA,(LYP,LLY))));	2
chrA1	14	185025596	185549851	5.24255	((PLE,(PUN,PTI)),(AJU,(FCA,(LYP,LLY))));	2
chrA1	13	185549854	185558330	0.08476	((PUN,(PLE,PTI)),(FCA,(AJU,(LYP,LLY))));	8
chrA1	14	185560596	186082715	5.22119	((PLE,(PUN,PTI)),(AJU,(FCA,(LYP,LLY))));	2
chrA1	0	186082736	186360297	2.77561	((PLE,(PUN,PTI)),(FCA,(AJU,(LYP,LLY))));	3
chrA1	19	186360385	186380859	0.20474	((PUN,(PLE,PTI)),(FCA,(AJU,(LYP,LLY))));	8
chrA1	12	186380866	186472383	0.91517	((PUN,(PLE,PTI)),((FCA,AJU),(LYP,LLY)));	5
chrA1	14	186472386	186751134	2.78748	((PLE,(PUN,PTI)),(FCA,(AJU,(LYP,LLY))));	3
chrA1	0	186751226	187505701	7.54475	((PTI,(PLE,PUN)),(FCA,(AJU,(LYP,LLY))));	9
chrA1	14	187505893	187700996	1.95103	((PLE,(PUN,PTI)),(AJU,(FCA,(LYP,LLY))));	2
chrA1	7	187701008	187901806	2.00798	((PLE,(PUN,PTI)),((FCA,AJU),(LYP,LLY)));	1
chrA1	28	187901807	187933783	0.31976	((PLE,(PUN,PTI)),((FCA,AJU),(LYP,LLY)));	1
chrA1	14	187933994	188068097	1.34103	((PUN,(PLE,PTI)),(AJU,(FCA,(LYP,LLY))));	7
chrA1	28	188068572	188076546	0.07974	((PLE,(PUN,PTI)),((FCA,AJU),(LYP,LLY)));	1
chrA1	19	188076751	188109884	0.33133	((PUN,(PLE,PTI)),((FCA,AJU),(LYP,LLY)));	5
chrA1	12	188109899	188219719	1.0982	((PTI,(PLE,PUN)),((FCA,AJU),(LYP,LLY)));	4
chrA1	19	188220246	188283266	0.6302	((PLE,(PUN,PTI)),(AJU,(FCA,(LYP,LLY))));	2
chrA1	7	188283452	188606179	3.22727	((PLE,(PUN,PTI)),((FCA,AJU),(LYP,LLY)));	1
chrA1	14	188606504	188791114	1.8461	((PUN,(PLE,PTI)),((FCA,AJU),(LYP,LLY)));	5
chrA1	7	188791229	189361530	5.70301	((PLE,(PUN,PTI)),((FCA,AJU),(LYP,LLY)));	1
chrA1	14	189361707	190689791	13.2808	((PLE,(PUN,PTI)),((FCA,AJU),(LYP,LLY)));	1
chrA1	28	190689836	190698596	0.0876	((PTI,(PLE,PUN)),((FCA,AJU),(LYP,LLY)));	4
chrA1	0	190698658	193099618	24.0096	((PLE,(PUN,PTI)),((FCA,AJU),(LYP,LLY)));	1
chrA1	14	193100023	193291276	1.91253	((PTI,(PLE,PUN)),(AJU,(FCA,(LYP,LLY))));	6
chrA1	12	193291290	194370462	10.7917	((PLE,(PUN,PTI)),((FCA,AJU),(LYP,LLY)));	1
chrA1	0	194370488	195399646	10.2916	((PLE,(PUN,PTI)),(AJU,(FCA,(LYP,LLY))));	2
chrA1	12	195399740	195824017	4.24277	((PLE,(PUN,PTI)),(FCA,(AJU,(LYP,LLY))));	3
chrA1	14	195824090	195904669	0.80579	((PLE,(PUN,PTI)),((FCA,AJU),(LYP,LLY)));	1
chrA1	12	195904933	196436418	5.31485	((PLE,(PUN,PTI)),((FCA,AJU),(LYP,LLY)));	1
chrA1	7	196436432	197823923	13.8749	((PLE,(PUN,PTI)),(FCA,(AJU,(LYP,LLY))));	3
chrA1	12	197823938	199526401	17.0246	((PLE,(PUN,PTI)),(AJU,(FCA,(LYP,LLY))));	2
chrA1	0	199526408	201235588	17.0918	((PLE,(PUN,PTI)),(AJU,(FCA,(LYP,LLY))));	2
chrA1	12	201235596	202599753	13.6416	((PLE,(PUN,PTI)),(AJU,(FCA,(LYP,LLY))));	2
chrA1	0	202599762	203018053	4.18291	((PLE,(PUN,PTI)),(AJU,(FCA,(LYP,LLY))));	2
chrA1	24	203018096	203019382	0.01286	((PLE,(PUN,PTI)),(AJU,(FCA,(LYP,LLY))));	24
chrA1	12	203019455	204121255	11.018	((PLE,(PUN,PTI)),(FCA,(AJU,(LYP,LLY))));	3
chrA1	7	204121388	205038624	9.17236	((PLE,(PUN,PTI)),(AJU,(FCA,(LYP,LLY))));	2
chrA1	14	205038668	205180695	1.42027	((PLE,(PUN,PTI)),(AJU,(FCA,(LYP,LLY))));	2
chrA1	7	205180792	207738359	25.5757	((PLE,(PUN,PTI)),((FCA,AJU),(LYP,LLY)));	1
chrA1	28	207738435	207745621	0.07186	((PLE,(PUN,PTI)),((FCA,AJU),(LYP,LLY)));	1
chrA1	14	207745895	207799071	0.53176	((PLE,(PUN,PTI)),((FCA,AJU),(LYP,LLY)));	1
chrA1	12	207799243	208408871	6.09628	((PLE,(PUN,PTI)),(AJU,(FCA,(LYP,LLY))));	2
chrA1	7	208408881	208608436	1.99555	((PLE,(PUN,PTI)),(AJU,(FCA,(LYP,LLY))));	2
chrA1	19	208608449	208737310	1.28861	((PLE,(PUN,PTI)),(AJU,(FCA,(LYP,LLY))));	2
chrA1	12	208737618	210114228	13.7661	((PLE,(PUN,PTI)),(AJU,(FCA,(LYP,LLY))));	2
chrA1	28	210114280	210163869	0.49589	((PLE,(PUN,PTI)),((FCA,AJU),(LYP,LLY)));	1
chrA1	0	210163897	210351895	1.87998	((PTI,(PLE,PUN)),(FCA,(AJU,(LYP,LLY))));	9
chrA1	14	210351973	210555695	2.03722	((PTI,(PLE,PUN)),(AJU,(FCA,(LYP,LLY))));	6
chrA1	0	210555722	211446108	8.90386	((PLE,(PUN,PTI)),(FCA,(AJU,(LYP,LLY))));	3
chrA1	28	211446197	211481225	0.35028	((PLE,(PUN,PTI)),((FCA,AJU),(LYP,LLY)));	1
chrA1	7	211481383	212969124	14.8774	((PLE,(PUN,PTI)),((FCA,AJU),(LYP,LLY)));	1
chrA1	26	212969297	212997033	0.27736	((PLE,(PUN,PTI)),((FCA,AJU),(LYP,LLY)));	1
chrA1	12	212997082	213211293	2.14211	((PUN,(PLE,PTI)),(FCA,(AJU,(LYP,LLY))));	8
chrA1	14	213211375	213558928	3.47553	((PUN,(PLE,PTI)),(AJU,(FCA,(LYP,LLY))));	7
chrA1	0	213559054	214071558	5.12504	((PLE,(PUN,PTI)),((FCA,AJU),(LYP,LLY)));	1
chrA1	14	214071733	214408008	3.36275	((PLE,(PUN,PTI)),(FCA,(AJU,(LYP,LLY))));	3
chrA1	0	214408058	215960482	15.5242	((PLE,(PUN,PTI)),(AJU,(FCA,(LYP,LLY))));	2
chrA1	12	215960513	218324396	23.6388	((PLE,(PUN,PTI)),((FCA,AJU),(LYP,LLY)));	1
chrA1	19	218324431	218339740	0.15309	((PLE,(PUN,PTI)),(AJU,(FCA,(LYP,LLY))));	2
chrA1	28	218339753	218349216	0.09463	((PLE,(PUN,PTI)),((FCA,AJU),(LYP,LLY)));	1
chrA1	0	218349335	220876597	25.2726	((PLE,(PUN,PTI)),((FCA,AJU),(LYP,LLY)));	1
chrA1	19	220876613	220911267	0.34654	((PLE,(PUN,PTI)),(AJU,(FCA,(LYP,LLY))));	2
chrA1	12	220911367	221870330	9.58963	((PLE,(PUN,PTI)),((FCA,AJU),(LYP,LLY)));	1
chrA1	7	221870424	222568861	6.98437	((PLE,(PUN,PTI)),(AJU,(FCA,(LYP,LLY))));	2
chrA1	12	222568881	223568178	9.99297	((PLE,(PUN,PTI)),(AJU,(FCA,(LYP,LLY))));	2
chrA1	19	223568182	223603383	0.35201	((PLE,(PUN,PTI)),(FCA,(AJU,(LYP,LLY))));	3
chrA1	12	223603561	224986207	13.8265	((PLE,(PUN,PTI)),(AJU,(FCA,(LYP,LLY))));	2
chrA1	13	224986256	224989502	0.03246	((PLE,(PUN,PTI)),(AJU,(FCA,(LYP,LLY))));	34
chrA1	12	224989549	228119360	31.2981	((PLE,(PUN,PTI)),(AJU,(FCA,(LYP,LLY))));	2
chrA1	7	228119387	228523504	4.04117	((PLE,(PUN,PTI)),(AJU,(FCA,(LYP,LLY))));	2
chrA1	14	228523563	228876193	3.5263	((PLE,(PUN,PTI)),(FCA,(AJU,(LYP,LLY))));	3
chrA1	12	228876259	230961136	20.8488	((PLE,(PUN,PTI)),((FCA,AJU),(LYP,LLY)));	1
chrA1	19	230961147	230987994	0.26847	((PLE,(PUN,PTI)),(AJU,(FCA,(LYP,LLY))));	2
chrA1	12	230988106	232142082	11.5398	((PLE,(PUN,PTI)),((FCA,AJU),(LYP,LLY)));	1
chrA1	14	232142084	232224530	0.82446	((PUN,(PLE,PTI)),(AJU,(FCA,(LYP,LLY))));	7
chrA1	12	232224548	235324662	31.0011	((PLE,(PUN,PTI)),((FCA,AJU),(LYP,LLY)));	1
chrA1	19	235324664	235370088	0.45424	((PLE,(PUN,PTI)),(AJU,(FCA,(LYP,LLY))));	2
chrA1	12	235370112	236340081	9.69969	((PLE,(PUN,PTI)),(AJU,(FCA,(LYP,LLY))));	2
chrA1	19	236340094	236369867	0.29773	((PLE,(PUN,PTI)),((FCA,AJU),(LYP,LLY)));	1
chrA1	12	236370004	238018547	16.4854	((PLE,(PUN,PTI)),((FCA,AJU),(LYP,LLY)));	1
chrA1	19	238018550	238031885	0.13335	((PLE,(PUN,PTI)),((FCA,AJU),(LYP,LLY)));	1
chrA1	12	238031894	238503357	4.71463	((PLE,(PUN,PTI)),((FCA,AJU),(LYP,LLY)));	1
chrA1	7	238503414	239192373	6.88959	((PLE,(PUN,PTI)),((FCA,AJU),(LYP,LLY)));	1
chrA1	19	239192604	239283129	0.90525	((PLE,(PUN,PTI)),(AJU,(FCA,(LYP,LLY))));	2
chrA1	7	239283137	239377539	0.94402	((PLE,(PUN,PTI)),(AJU,(FCA,(LYP,LLY))));	2
chrA1	19	239377580	239422601	0.45021	((PLE,(PUN,PTI)),(AJU,(FCA,(LYP,LLY))));	2
chrA1	12	239422634	239443424	0.2079	((PUN,(PLE,PTI)),((FCA,AJU),(LYP,LLY)));	5
chrA1	19	239443428	239813941	3.70513	((PLE,(PUN,PTI)),(AJU,(FCA,(LYP,LLY))));	2
chrA1	12	239813951	239855886	0.41935	((PLE,(PUN,PTI)),(AJU,(FCA,(LYP,LLY))));	2
chrA1	28	239855959	239936996	0.81037	((PTI,(PLE,PUN)),((FCA,AJU),(LYP,LLY)));	4
chrA1	14	239937067	240380040	4.42973	((PLE,(PUN,PTI)),(AJU,(FCA,(LYP,LLY))));	2
chrA2	0	5172	129850	1.24678	((PLE,(PUN,PTI)),(AJU,(FCA,(LYP,LLY))));	2
chrA2	10	129959	1829532	16.9957	((PLE,(PUN,PTI)),(AJU,(FCA,(LYP,LLY))));	2
chrA2	16	1829772	2274206	4.44434	((PLE,(PUN,PTI)),((FCA,AJU),(LYP,LLY)));	1
chrA2	10	2274209	4649757	23.7555	((PLE,(PUN,PTI)),(AJU,(FCA,(LYP,LLY))));	2
chrA2	4	4649799	4908991	2.59192	((PLE,(PUN,PTI)),(AJU,(FCA,(LYP,LLY))));	2
chrA2	16	4909689	5543705	6.34016	((PLE,(PUN,PTI)),(FCA,(AJU,(LYP,LLY))));	3
chrA2	10	5543785	5675644	1.31859	((PLE,(PUN,PTI)),((FCA,AJU),(LYP,LLY)));	1
chrA2	16	5675704	5819485	1.43781	((PLE,(PUN,PTI)),((FCA,AJU),(LYP,LLY)));	1
chrA2	10	5819541	6214131	3.9459	((PLE,(PUN,PTI)),((FCA,AJU),(LYP,LLY)));	1
chrA2	4	6214408	6572295	3.57887	((PLE,(PUN,PTI)),(AJU,(FCA,(LYP,LLY))));	2
chrA2	16	6573423	7095203	5.2178	((PUN,(PLE,PTI)),(FCA,(AJU,(LYP,LLY))));	8
chrA2	11	7095310	7096376	0.01066	((PUN,(PLE,PTI)),(FCA,(AJU,(LYP,LLY))));	17
chrA2	16	7096479	7673478	5.76999	((PLE,(PUN,PTI)),(FCA,(AJU,(LYP,LLY))));	3
chrA2	10	7673491	7705582	0.32091	((PLE,(PUN,PTI)),(FCA,(AJU,(LYP,LLY))));	3
chrA2	4	7705583	8191631	4.86048	((PLE,(PUN,PTI)),(FCA,(AJU,(LYP,LLY))));	3
chrA2	10	8191674	8407088	2.15414	((PLE,(PUN,PTI)),((FCA,AJU),(LYP,LLY)));	1
chrA2	16	8407091	8968702	5.61611	((PLE,(PUN,PTI)),((FCA,AJU),(LYP,LLY)));	1
chrA2	10	8968726	9494347	5.25621	((PLE,(PUN,PTI)),(AJU,(FCA,(LYP,LLY))));	2
chrA2	4	9494354	9768467	2.74113	((PLE,(PUN,PTI)),((FCA,AJU),(LYP,LLY)));	1
chrA2	10	9768485	10133202	3.64717	((PLE,(PUN,PTI)),(FCA,(AJU,(LYP,LLY))));	3
chrA2	16	10133225	10290532	1.57307	((PLE,(PUN,PTI)),(AJU,(FCA,(LYP,LLY))));	2
chrA2	10	10291654	10396089	1.04435	((PLE,(PUN,PTI)),(AJU,(FCA,(LYP,LLY))));	2
chrA2	16	10396135	10603221	2.07086	((PLE,(PUN,PTI)),((FCA,AJU),(LYP,LLY)));	1
chrA2	0	10603342	10868467	2.65125	((PLE,(PUN,PTI)),(FCA,(AJU,(LYP,LLY))));	3
chrA2	16	10868537	11166711	2.98174	((PLE,(PUN,PTI)),((FCA,AJU),(LYP,LLY)));	1
chrA2	22	11166750	11167308	0.00558	((PLE,(PUN,PTI)),(AJU,(FCA,(LYP,LLY))));	36
chrA2	23	11167328	11351214	1.83886	((PLE,(PUN,PTI)),((FCA,AJU),(LYP,LLY)));	1
chrA2	16	11351370	11535265	1.83895	((PLE,(PUN,PTI)),(AJU,(FCA,(LYP,LLY))));	2
chrA2	25	11537564	11569609	0.32045	((PLE,(PUN,PTI)),(AJU,(FCA,(LYP,LLY))));	23
chrA2	16	11569650	12028582	4.58932	((PLE,(PUN,PTI)),((FCA,AJU),(LYP,LLY)));	1
chrA2	10	12028615	12217992	1.89377	((PLE,(PUN,PTI)),(AJU,(FCA,(LYP,LLY))));	2
chrA2	16	12218012	12345960	1.27948	((PLE,(PUN,PTI)),((FCA,AJU),(LYP,LLY)));	1
chrA2	10	12346007	12439959	0.93952	((PLE,(PUN,PTI)),(AJU,(FCA,(LYP,LLY))));	2
chrA2	16	12440045	12793158	3.53113	((PLE,(PUN,PTI)),((FCA,AJU),(LYP,LLY)));	1
chrA2	4	12793201	12908363	1.15162	((PLE,(PUN,PTI)),(AJU,(FCA,(LYP,LLY))));	2
chrA2	10	12908458	13796105	8.87647	((PLE,(PUN,PTI)),(AJU,(FCA,(LYP,LLY))));	2
chrA2	4	13796154	14483552	6.87398	((PLE,(PUN,PTI)),((FCA,AJU),(LYP,LLY)));	1
chrA2	0	14483625	14627758	1.44133	((PLE,(PUN,PTI)),((FCA,AJU),(LYP,LLY)));	1
chrA2	16	14627776	16432237	18.0446	((PLE,(PUN,PTI)),((FCA,AJU),(LYP,LLY)));	1
chrA2	0	16432282	16725470	2.93188	((PLE,(PUN,PTI)),(FCA,(AJU,(LYP,LLY))));	3
chrA2	16	16725660	16862423	1.36763	((PLE,(PUN,PTI)),((FCA,AJU),(LYP,LLY)));	1
chrA2	0	16862471	17574221	7.1175	((PLE,(PUN,PTI)),(AJU,(FCA,(LYP,LLY))));	2
chrA2	4	17574305	17865657	2.91352	((PLE,(PUN,PTI)),((FCA,AJU),(LYP,LLY)));	1
chrA2	0	17865689	20994769	31.2908	((PLE,(PUN,PTI)),((FCA,AJU),(LYP,LLY)));	1
chrA2	9	20994770	21005307	0.10537	((PUN,(PLE,PTI)),((FCA,AJU),(LYP,LLY)));	5
chrA2	0	21005392	21488969	4.83577	((PLE,(PUN,PTI)),(FCA,(AJU,(LYP,LLY))));	3
chrA2	4	21488993	21687680	1.98687	((PLE,(PUN,PTI)),(FCA,(AJU,(LYP,LLY))));	3
chrA2	0	21687783	21823557	1.35774	((PLE,(PUN,PTI)),(AJU,(FCA,(LYP,LLY))));	2
chrA2	4	21823611	22250064	4.26453	((PLE,(PUN,PTI)),((FCA,AJU),(LYP,LLY)));	1
chrA2	33	22250086	22254921	0.04835	((PLE,(PUN,PTI)),((FCA,AJU),(LYP,LLY)));	1
chrA2	10	22255184	22371363	1.16179	((PLE,(PUN,PTI)),(FCA,(AJU,(LYP,LLY))));	3
chrA2	4	22371433	24030419	16.5899	((PLE,(PUN,PTI)),(AJU,(FCA,(LYP,LLY))));	2
chrA2	0	24030491	24926768	8.96277	((PLE,(PUN,PTI)),((FCA,AJU),(LYP,LLY)));	1
chrA2	4	24927100	26348570	14.2147	((PLE,(PUN,PTI)),((FCA,AJU),(LYP,LLY)));	1
chrA2	0	26348666	26583282	2.34616	((PLE,(PUN,PTI)),(FCA,(AJU,(LYP,LLY))));	3
chrA2	4	26583313	26800365	2.17052	((PLE,(PUN,PTI)),(FCA,(AJU,(LYP,LLY))));	3
chrA2	0	26800498	26927969	1.27471	((PTI,(PLE,PUN)),(FCA,(AJU,(LYP,LLY))));	9
chrA2	4	26927975	30940436	40.1246	((PLE,(PUN,PTI)),(AJU,(FCA,(LYP,LLY))));	2
chrA2	16	30940671	31480295	5.39624	((PLE,(PUN,PTI)),(FCA,(AJU,(LYP,LLY))));	3
chrA2	0	31480326	31662171	1.81845	((PTI,(PLE,PUN)),(AJU,(FCA,(LYP,LLY))));	6
chrA2	16	31662219	33782933	21.2071	((PLE,(PUN,PTI)),((FCA,AJU),(LYP,LLY)));	1
chrA2	0	33782996	33823530	0.40534	((PTI,(PLE,PUN)),(AJU,(FCA,(LYP,LLY))));	6
chrA2	16	33823626	36696204	28.7258	((PLE,(PUN,PTI)),((FCA,AJU),(LYP,LLY)));	1
chrA2	16	36713126	36746329	0.33203	((PLE,(PUN,PTI)),(FCA,(AJU,(LYP,LLY))));	3
chrA2	7	36746346	36751964	0.05618	((PLE,(PUN,PTI)),(AJU,(FCA,(LYP,LLY))));	2
chrA2	4	36752057	39231929	24.7987	((PLE,(PUN,PTI)),(AJU,(FCA,(LYP,LLY))));	2
chrA2	16	39231959	39478533	2.46574	((PLE,(PUN,PTI)),(AJU,(FCA,(LYP,LLY))));	2
chrA2	0	39478625	39589819	1.11194	((PTI,(PLE,PUN)),((FCA,AJU),(LYP,LLY)));	4
chrA2	16	39589859	39768068	1.78209	((PTI,(PLE,PUN)),((FCA,AJU),(LYP,LLY)));	4
chrA2	4	39768109	44617607	48.495	((PLE,(PUN,PTI)),((FCA,AJU),(LYP,LLY)));	1
chrA2	0	44617624	44777416	1.59792	((PLE,(PUN,PTI)),(FCA,(AJU,(LYP,LLY))));	3
chrA2	4	44777428	45296829	5.19401	((PLE,(PUN,PTI)),((FCA,AJU),(LYP,LLY)));	1
chrA2	0	45296862	45382498	0.85636	((PUN,(PLE,PTI)),(FCA,(AJU,(LYP,LLY))));	8
chrA2	4	45382525	45503638	1.21113	((PLE,(PUN,PTI)),(AJU,(FCA,(LYP,LLY))));	2
chrA2	0	45503950	45946266	4.42316	((PLE,(PUN,PTI)),(AJU,(FCA,(LYP,LLY))));	2
chrA2	24	45946301	45952985	0.06684	((PTI,(PLE,PUN)),((FCA,AJU),(LYP,LLY)));	4
chrA2	0	45952990	46143147	1.90157	((PLE,(PUN,PTI)),(AJU,(FCA,(LYP,LLY))));	2
chrA2	4	46143703	46331398	1.87695	((PLE,(PUN,PTI)),(FCA,(AJU,(LYP,LLY))));	3
chrA2	34	46331423	46333688	0.02265	((PLE,(PUN,PTI)),((FCA,AJU),(LYP,LLY)));	1
chrA2	0	46333717	46927227	5.9351	((PLE,(PUN,PTI)),((FCA,AJU),(LYP,LLY)));	1
chrA2	4	46927304	47299821	3.72517	((PLE,(PUN,PTI)),(FCA,(AJU,(LYP,LLY))));	3
chrA2	24	47299908	47307836	0.07928	((PTI,(PLE,PUN)),((FCA,AJU),(LYP,LLY)));	4
chrA2	0	47308047	47677813	3.69766	((PLE,(PUN,PTI)),((FCA,AJU),(LYP,LLY)));	1
chrA2	4	47677825	47983419	3.05594	((PLE,(PUN,PTI)),(FCA,(AJU,(LYP,LLY))));	3
chrA2	0	47983449	48123538	1.40089	((PUN,(PLE,PTI)),((FCA,AJU),(LYP,LLY)));	5
chrA2	16	48123544	48160230	0.36686	((PLE,(PUN,PTI)),(AJU,(FCA,(LYP,LLY))));	2
chrA2	0	48160492	48889959	7.29467	((PLE,(PUN,PTI)),(AJU,(FCA,(LYP,LLY))));	2
chrA2	24	48890235	48901581	0.11346	((PUN,(PLE,PTI)),((FCA,AJU),(LYP,LLY)));	5
chrA2	0	48901613	48986364	0.84751	((PUN,(PLE,PTI)),(FCA,(AJU,(LYP,LLY))));	8
chrA2	4	48986452	49475167	4.88715	((PLE,(PUN,PTI)),(AJU,(FCA,(LYP,LLY))));	2
chrA2	0	49475173	49850399	3.75226	((PUN,(PLE,PTI)),(FCA,(AJU,(LYP,LLY))));	8
chrA2	4	49850432	50092075	2.41643	((PTI,(PLE,PUN)),(AJU,(FCA,(LYP,LLY))));	6
chrA2	16	50092080	50235985	1.43905	((PLE,(PUN,PTI)),(AJU,(FCA,(LYP,LLY))));	2
chrA2	4	50236014	50688941	4.52927	((PLE,(PUN,PTI)),(AJU,(FCA,(LYP,LLY))));	2
chrA2	9	50689288	50712237	0.22949	((PLE,(PUN,PTI)),((FCA,AJU),(LYP,LLY)));	1
chrA2	0	50712518	51204558	4.9204	((PLE,(PUN,PTI)),(AJU,(FCA,(LYP,LLY))));	2
chrA2	9	51204593	51232843	0.2825	((PLE,(PUN,PTI)),((FCA,AJU),(LYP,LLY)));	1
chrA2	0	51232973	51490026	2.57053	((PLE,(PUN,PTI)),(AJU,(FCA,(LYP,LLY))));	2
chrA2	10	51490565	51743292	2.52727	((PLE,(PUN,PTI)),((FCA,AJU),(LYP,LLY)));	1
chrA2	34	51743318	51774203	0.30885	((PTI,(PLE,PUN)),((FCA,AJU),(LYP,LLY)));	4
chrA2	16	51774241	51899018	1.24777	((PLE,(PUN,PTI)),((FCA,AJU),(LYP,LLY)));	1
chrA2	10	51899022	51953993	0.54971	((PLE,(PUN,PTI)),(FCA,(AJU,(LYP,LLY))));	3
chrA2	16	51954011	52261962	3.07951	((PLE,(PUN,PTI)),(AJU,(FCA,(LYP,LLY))));	2
chrA2	34	52261981	52266037	0.04056	((PLE,(PUN,PTI)),((FCA,AJU),(LYP,LLY)));	1
chrA2	10	52266092	52331547	0.65455	((PLE,(PUN,PTI)),((FCA,AJU),(LYP,LLY)));	1
chrA2	4	52331594	52762039	4.30445	((PUN,(PLE,PTI)),(AJU,(FCA,(LYP,LLY))));	7
chrA2	0	52762077	52875632	1.13555	((PUN,(PLE,PTI)),(AJU,(FCA,(LYP,LLY))));	7
chrA2	16	52875884	52983776	1.07892	((PUN,(PLE,PTI)),(FCA,(AJU,(LYP,LLY))));	8
chrA2	0	52983785	53645297	6.61512	((PLE,(PUN,PTI)),(FCA,(AJU,(LYP,LLY))));	3
chrA2	16	53645323	53717344	0.72021	((PLE,(PUN,PTI)),((FCA,AJU),(LYP,LLY)));	1
chrA2	0	53717371	54506574	7.89203	((PLE,(PUN,PTI)),(AJU,(FCA,(LYP,LLY))));	2
chrA2	4	54507043	54591391	0.84348	((PLE,(PUN,PTI)),((FCA,AJU),(LYP,LLY)));	1
chrA2	0	54591401	54733050	1.41649	((PLE,(PUN,PTI)),(AJU,(FCA,(LYP,LLY))));	2
chrA2	9	54733236	54769782	0.36546	((PLE,(PUN,PTI)),((FCA,AJU),(LYP,LLY)));	1
chrA2	4	54769943	55501728	7.31785	((PLE,(PUN,PTI)),(AJU,(FCA,(LYP,LLY))));	2
chrA2	10	55501857	55522916	0.21059	((PLE,(PUN,PTI)),(AJU,(FCA,(LYP,LLY))));	2
chrA2	16	55522991	56266351	7.4336	((PLE,(PUN,PTI)),((FCA,AJU),(LYP,LLY)));	1
chrA2	23	56266479	56403733	1.37254	((PLE,(PUN,PTI)),((FCA,AJU),(LYP,LLY)));	1
chrA2	10	56403765	56447955	0.4419	((PLE,(PUN,PTI)),((FCA,AJU),(LYP,LLY)));	1
chrA2	25	56448168	56460144	0.11976	((PLE,(PUN,PTI)),(AJU,(FCA,(LYP,LLY))));	2
chrA2	0	56460157	56474402	0.14245	((PLE,(PUN,PTI)),(FCA,(AJU,(LYP,LLY))));	3
chrA2	23	56474454	56524041	0.49587	((PTI,(PLE,PUN)),((FCA,AJU),(LYP,LLY)));	4
chrA2	4	56524051	56899332	3.75281	((PLE,(PUN,PTI)),((FCA,AJU),(LYP,LLY)));	1
chrA2	10	56899366	57428648	5.29282	((PLE,(PUN,PTI)),((FCA,AJU),(LYP,LLY)));	1
chrA2	4	57428672	57847529	4.18857	((PLE,(PUN,PTI)),((FCA,AJU),(LYP,LLY)));	1
chrA2	0	57847549	57945659	0.9811	((PLE,(PUN,PTI)),(FCA,(AJU,(LYP,LLY))));	3
chrA2	4	57945689	58588490	6.42801	((PLE,(PUN,PTI)),((FCA,AJU),(LYP,LLY)));	1
chrA2	16	58588522	58783533	1.95011	((PLE,(PUN,PTI)),((FCA,AJU),(LYP,LLY)));	1
chrA2	10	58783572	59034018	2.50446	((PLE,(PUN,PTI)),(FCA,(AJU,(LYP,LLY))));	3
chrA2	4	59034047	60054610	10.2056	((PLE,(PUN,PTI)),(AJU,(FCA,(LYP,LLY))));	2
chrA2	9	60056699	60129815	0.73116	((PUN,(PLE,PTI)),((FCA,AJU),(LYP,LLY)));	5
chrA2	10	60129827	60852857	7.2303	((PLE,(PUN,PTI)),((FCA,AJU),(LYP,LLY)));	1
chrA2	0	60852881	61079134	2.26253	((PLE,(PUN,PTI)),(AJU,(FCA,(LYP,LLY))));	2
chrA2	10	61079157	61532913	4.53756	((PTI,(PLE,PUN)),(AJU,(FCA,(LYP,LLY))));	6
chrA2	9	61532951	61543668	0.10717	((PLE,(PUN,PTI)),((FCA,AJU),(LYP,LLY)));	1
chrA2	10	61543700	61588370	0.4467	((PLE,(PUN,PTI)),((FCA,AJU),(LYP,LLY)));	1
chrA2	16	61588394	61968823	3.80429	((PLE,(PUN,PTI)),(FCA,(AJU,(LYP,LLY))));	3
chrA2	10	61968884	62066433	0.97549	((PLE,(PUN,PTI)),(AJU,(FCA,(LYP,LLY))));	2
chrA2	16	62066455	62118203	0.51748	((PLE,(PUN,PTI)),(FCA,(AJU,(LYP,LLY))));	3
chrA2	10	62118218	62365717	2.47499	((PLE,(PUN,PTI)),(AJU,(FCA,(LYP,LLY))));	2
chrA2	16	62365753	62477226	1.11473	((PLE,(PUN,PTI)),(AJU,(FCA,(LYP,LLY))));	2
chrA2	10	62477227	62497989	0.20762	((PLE,(PUN,PTI)),(AJU,(FCA,(LYP,LLY))));	2
chrA2	23	62498312	62520674	0.22362	((PLE,(PUN,PTI)),((FCA,AJU),(LYP,LLY)));	1
chrA2	0	62520746	62567910	0.47164	((PLE,(PUN,PTI)),(FCA,(AJU,(LYP,LLY))));	3
chrA2	16	62567943	64794891	22.2695	((PLE,(PUN,PTI)),((FCA,AJU),(LYP,LLY)));	1
chrA2	10	64794905	64843359	0.48454	((PTI,(PLE,PUN)),((FCA,AJU),(LYP,LLY)));	4
chrA2	16	64843428	69404568	45.6114	((PLE,(PUN,PTI)),(AJU,(FCA,(LYP,LLY))));	2
chrA2	34	69404829	69412866	0.08037	((PLE,(PUN,PTI)),((FCA,AJU),(LYP,LLY)));	1
chrA2	16	69412947	71746724	23.3378	((PLE,(PUN,PTI)),(AJU,(FCA,(LYP,LLY))));	2
chrA2	4	71746733	73434402	16.8767	((PLE,(PUN,PTI)),(AJU,(FCA,(LYP,LLY))));	2
chrA2	0	73434605	73489300	0.54695	((PLE,(PUN,PTI)),(AJU,(FCA,(LYP,LLY))));	2
chrA2	16	73489311	74756342	12.6703	((PLE,(PUN,PTI)),((FCA,AJU),(LYP,LLY)));	1
chrA2	8	74756362	74758409	0.02047	((PLE,(PUN,PTI)),(AJU,(FCA,(LYP,LLY))));	25
chrA2	10	74758793	74770064	0.11271	((PLE,(PUN,PTI)),((FCA,AJU),(LYP,LLY)));	1
chrA2	16	74770066	75046913	2.76847	((PLE,(PUN,PTI)),((FCA,AJU),(LYP,LLY)));	1
chrA2	4	75046930	77516206	24.6928	((PLE,(PUN,PTI)),((FCA,AJU),(LYP,LLY)));	1
chrA2	0	77516273	77695619	1.79346	((PTI,(PLE,PUN)),(FCA,(AJU,(LYP,LLY))));	9
chrA2	16	77695688	77913216	2.17528	((PLE,(PUN,PTI)),((FCA,AJU),(LYP,LLY)));	1
chrA2	39	77913239	77913590	0.00351	((PLE,(PUN,PTI)),(FCA,(AJU,(LYP,LLY))));	40
chrA2	4	77913686	78538833	6.25147	((PLE,(PUN,PTI)),((FCA,AJU),(LYP,LLY)));	1
chrA2	0	78538878	78808464	2.69586	((PLE,(PUN,PTI)),(AJU,(FCA,(LYP,LLY))));	2
chrA2	4	78808481	81072380	22.639	((PLE,(PUN,PTI)),((FCA,AJU),(LYP,LLY)));	1
chrA2	0	81072412	81588730	5.16318	((PLE,(PUN,PTI)),(FCA,(AJU,(LYP,LLY))));	3
chrA2	4	81588905	82675929	10.8702	((PLE,(PUN,PTI)),((FCA,AJU),(LYP,LLY)));	1
chrA2	16	82675952	82806641	1.30689	((PLE,(PUN,PTI)),((FCA,AJU),(LYP,LLY)));	1
chrA2	0	82806643	82901419	0.94776	((PTI,(PLE,PUN)),(FCA,(AJU,(LYP,LLY))));	9
chrA2	24	82901515	82910999	0.09484	((PLE,(PUN,PTI)),((FCA,AJU),(LYP,LLY)));	1
chrA2	4	82911044	83681167	7.70123	((PLE,(PUN,PTI)),(AJU,(FCA,(LYP,LLY))));	2
chrA2	9	83684110	83707175	0.23065	((PTI,(PLE,PUN)),((FCA,AJU),(LYP,LLY)));	4
chrA2	4	83707195	84034044	3.26849	((PLE,(PUN,PTI)),(AJU,(FCA,(LYP,LLY))));	2
chrA2	9	84034133	84063160	0.29027	((PTI,(PLE,PUN)),((FCA,AJU),(LYP,LLY)));	4
chrA2	0	84063568	84135272	0.71704	((PLE,(PUN,PTI)),((FCA,AJU),(LYP,LLY)));	1
chrA2	33	84135295	84142570	0.07275	((PLE,(PUN,PTI)),((FCA,AJU),(LYP,LLY)));	1
chrA2	16	84143108	84221598	0.7849	((PLE,(PUN,PTI)),((FCA,AJU),(LYP,LLY)));	1
chrA2	34	84221647	84227040	0.05393	((PUN,(PLE,PTI)),((FCA,AJU),(LYP,LLY)));	5
chrA2	4	84227358	84422085	1.94727	((PLE,(PUN,PTI)),(AJU,(FCA,(LYP,LLY))));	2
chrA2	0	84422104	84537924	1.1582	((PLE,(PUN,PTI)),(AJU,(FCA,(LYP,LLY))));	2
chrA2	16	84537944	84619823	0.81879	((PLE,(PUN,PTI)),((FCA,AJU),(LYP,LLY)));	1
chrA2	0	84619867	84779528	1.59661	((PLE,(PUN,PTI)),(AJU,(FCA,(LYP,LLY))));	2
chrA2	4	84779605	85254693	4.75088	((PUN,(PLE,PTI)),(AJU,(FCA,(LYP,LLY))));	7
chrA2	16	85254722	85723012	4.6829	((PLE,(PUN,PTI)),((FCA,AJU),(LYP,LLY)));	1
chrA2	4	85723513	86515879	7.92366	((PLE,(PUN,PTI)),(AJU,(FCA,(LYP,LLY))));	2
chrA2	34	86515935	86519008	0.03073	((PLE,(PUN,PTI)),((FCA,AJU),(LYP,LLY)));	1
chrA2	16	86519238	86596393	0.77155	((PLE,(PUN,PTI)),(AJU,(FCA,(LYP,LLY))));	2
chrA2	34	86596395	86600133	0.03738	((PLE,(PUN,PTI)),((FCA,AJU),(LYP,LLY)));	1
chrA2	0	86600150	86656658	0.56508	((PLE,(PUN,PTI)),(FCA,(AJU,(LYP,LLY))));	3
chrA2	16	86656684	86779423	1.22739	((PLE,(PUN,PTI)),(AJU,(FCA,(LYP,LLY))));	2
chrA2	0	86779446	86926804	1.47358	((PLE,(PUN,PTI)),(AJU,(FCA,(LYP,LLY))));	2
chrA2	16	86926820	87332129	4.05309	((PLE,(PUN,PTI)),((FCA,AJU),(LYP,LLY)));	1
chrA2	0	87332273	87358602	0.26329	((PTI,(PLE,PUN)),(FCA,(AJU,(LYP,LLY))));	9
chrA2	9	87358609	87370162	0.11553	((PTI,(PLE,PUN)),((FCA,AJU),(LYP,LLY)));	4
chrA2	4	87370199	87458464	0.88265	((PUN,(PLE,PTI)),(AJU,(FCA,(LYP,LLY))));	7
chrA2	33	87458594	87463964	0.0537	((PLE,(PUN,PTI)),((FCA,AJU),(LYP,LLY)));	1
chrA2	4	87463974	88324010	8.60036	((PLE,(PUN,PTI)),(FCA,(AJU,(LYP,LLY))));	3
chrA2	16	88324302	89782597	14.583	((PLE,(PUN,PTI)),((FCA,AJU),(LYP,LLY)));	1
chrA2	4	89782683	90606065	8.23382	((PLE,(PUN,PTI)),(AJU,(FCA,(LYP,LLY))));	2
chrA2	0	90606089	90749014	1.42925	((PLE,(PUN,PTI)),(AJU,(FCA,(LYP,LLY))));	2
chrA2	10	90749052	90884163	1.35111	((PLE,(PUN,PTI)),((FCA,AJU),(LYP,LLY)));	1
chrA2	4	90884184	93393870	25.0969	((PLE,(PUN,PTI)),((FCA,AJU),(LYP,LLY)));	1
chrA2	0	93394414	93769486	3.75072	((PLE,(PUN,PTI)),(FCA,(AJU,(LYP,LLY))));	3
chrA2	4	93769576	94113749	3.44173	((PLE,(PUN,PTI)),(AJU,(FCA,(LYP,LLY))));	2
chrA2	0	94113804	94915712	8.01908	((PLE,(PUN,PTI)),(FCA,(AJU,(LYP,LLY))));	3
chrA2	4	94915747	95308106	3.92359	((PLE,(PUN,PTI)),((FCA,AJU),(LYP,LLY)));	1
chrA2	0	95308237	95732198	4.23961	((PLE,(PUN,PTI)),(AJU,(FCA,(LYP,LLY))));	2
chrA2	9	95732251	95766838	0.34587	((PTI,(PLE,PUN)),((FCA,AJU),(LYP,LLY)));	4
chrA2	0	95766992	95944972	1.7798	((PLE,(PUN,PTI)),(AJU,(FCA,(LYP,LLY))));	2
chrA2	4	95945002	96067486	1.22484	((PLE,(PUN,PTI)),((FCA,AJU),(LYP,LLY)));	1
chrA2	0	96067524	96306908	2.39384	((PLE,(PUN,PTI)),(AJU,(FCA,(LYP,LLY))));	2
chrA2	4	96306982	96398489	0.91507	((PLE,(PUN,PTI)),((FCA,AJU),(LYP,LLY)));	1
chrA2	0	96398501	96479897	0.81396	((PLE,(PUN,PTI)),(AJU,(FCA,(LYP,LLY))));	2
chrA2	4	96479971	96772197	2.92226	((PLE,(PUN,PTI)),((FCA,AJU),(LYP,LLY)));	1
chrA2	0	96772519	96981831	2.09312	((PLE,(PUN,PTI)),(AJU,(FCA,(LYP,LLY))));	2
chrA2	4	96982037	98002999	10.2096	((PLE,(PUN,PTI)),((FCA,AJU),(LYP,LLY)));	1
chrA2	24	98003051	98010304	0.07253	((PLE,(PUN,PTI)),((FCA,AJU),(LYP,LLY)));	1
chrA2	0	98010327	98294787	2.8446	((PLE,(PUN,PTI)),(AJU,(FCA,(LYP,LLY))));	2
chrA2	4	98294807	103436784	51.4198	((PLE,(PUN,PTI)),((FCA,AJU),(LYP,LLY)));	1
chrA2	9	103436789	103445695	0.08906	((PUN,(PLE,PTI)),((FCA,AJU),(LYP,LLY)));	5
chrA2	4	103445711	104811367	13.6566	((PLE,(PUN,PTI)),(FCA,(AJU,(LYP,LLY))));	3
chrA2	16	104811843	105610313	7.9847	((PLE,(PUN,PTI)),(AJU,(FCA,(LYP,LLY))));	2
chrA2	0	105610970	105645891	0.34921	((PUN,(PLE,PTI)),(FCA,(AJU,(LYP,LLY))));	8
chrA2	4	105645980	107457447	18.1147	((PLE,(PUN,PTI)),(AJU,(FCA,(LYP,LLY))));	2
chrA2	0	107457515	107624598	1.67083	((PLE,(PUN,PTI)),(FCA,(AJU,(LYP,LLY))));	3
chrA2	4	107624858	108150180	5.25322	((PLE,(PUN,PTI)),((FCA,AJU),(LYP,LLY)));	1
chrA2	33	108150328	108155601	0.05273	((PLE,(PUN,PTI)),(AJU,(FCA,(LYP,LLY))));	2
chrA2	0	108155605	108195848	0.40243	((PLE,(PUN,PTI)),(FCA,(AJU,(LYP,LLY))));	3
chrA2	16	108195850	108500064	3.04214	((PLE,(PUN,PTI)),((FCA,AJU),(LYP,LLY)));	1
chrA2	0	108500073	108604145	1.04072	((PLE,(PUN,PTI)),(AJU,(FCA,(LYP,LLY))));	2
chrA2	16	108604263	108822629	2.18366	((PLE,(PUN,PTI)),((FCA,AJU),(LYP,LLY)));	1
chrA2	4	108822708	110589238	17.6653	((PLE,(PUN,PTI)),(AJU,(FCA,(LYP,LLY))));	2
chrA2	0	110590076	110688407	0.98331	((PLE,(PUN,PTI)),(FCA,(AJU,(LYP,LLY))));	3
chrA2	24	110688411	110707586	0.19175	((PLE,(PUN,PTI)),((FCA,AJU),(LYP,LLY)));	1
chrA2	0	110707592	110808648	1.01056	((PLE,(PUN,PTI)),(AJU,(FCA,(LYP,LLY))));	2
chrA2	4	110808786	111880411	10.7163	((PLE,(PUN,PTI)),(AJU,(FCA,(LYP,LLY))));	2
chrA2	0	111880661	112247946	3.67285	((PLE,(PUN,PTI)),(AJU,(FCA,(LYP,LLY))));	2
chrA2	16	112248119	112845909	5.9779	((PLE,(PUN,PTI)),((FCA,AJU),(LYP,LLY)));	1
chrA2	0	112845963	112975908	1.29945	((PTI,(PLE,PUN)),(AJU,(FCA,(LYP,LLY))));	6
chrA2	16	112975992	113893424	9.17432	((PLE,(PUN,PTI)),((FCA,AJU),(LYP,LLY)));	1
chrA2	0	113893451	114098101	2.0465	((PLE,(PUN,PTI)),((FCA,AJU),(LYP,LLY)));	1
chrA2	21	114098182	114099844	0.01662	((PUN,(PLE,PTI)),((FCA,AJU),(LYP,LLY)));	5
chrA2	4	114099999	114418393	3.18394	((PLE,(PUN,PTI)),(AJU,(FCA,(LYP,LLY))));	2
chrA2	33	114418426	114430793	0.12367	((PLE,(PUN,PTI)),((FCA,AJU),(LYP,LLY)));	1
chrA2	16	114430871	114541701	1.1083	((PLE,(PUN,PTI)),(FCA,(AJU,(LYP,LLY))));	3
chrA2	0	114541800	114600759	0.58959	((PLE,(PUN,PTI)),(FCA,(AJU,(LYP,LLY))));	3
chrA2	4	114600871	114912786	3.11915	((PLE,(PUN,PTI)),((FCA,AJU),(LYP,LLY)));	1
chrA2	0	114912793	115094304	1.81511	((PLE,(PUN,PTI)),(FCA,(AJU,(LYP,LLY))));	3
chrA2	4	115094313	117120151	20.2584	((PLE,(PUN,PTI)),(AJU,(FCA,(LYP,LLY))));	2
chrA2	0	117120302	117159003	0.38701	((PTI,(PLE,PUN)),((FCA,AJU),(LYP,LLY)));	4
chrA2	16	117159018	117859160	7.00142	((PLE,(PUN,PTI)),((FCA,AJU),(LYP,LLY)));	1
chrA2	7	117859260	117860272	0.01012	((PLE,(PUN,PTI)),(AJU,(FCA,(LYP,LLY))));	2
chrA2	4	117860376	118064900	2.04524	((PLE,(PUN,PTI)),((FCA,AJU),(LYP,LLY)));	1
chrA2	16	118064947	118862599	7.97652	((PLE,(PUN,PTI)),(AJU,(FCA,(LYP,LLY))));	2
chrA2	4	118862639	119527291	6.64652	((PLE,(PUN,PTI)),((FCA,AJU),(LYP,LLY)));	1
chrA2	16	119527302	122382908	28.5561	((PLE,(PUN,PTI)),((FCA,AJU),(LYP,LLY)));	1
chrA2	7	122383432	122391765	0.08333	((PUN,(PLE,PTI)),((FCA,AJU),(LYP,LLY)));	5
chrA2	39	122391965	122393640	0.01675	((PUN,(PLE,PTI)),((FCA,AJU),(LYP,LLY)));	5
chrA2	16	122393708	123115176	7.21468	((PLE,(PUN,PTI)),((FCA,AJU),(LYP,LLY)));	1
chrA2	0	123115231	123304839	1.89608	((PUN,(PLE,PTI)),(FCA,(AJU,(LYP,LLY))));	8
chrA2	9	123304894	123317725	0.12831	((PLE,(PUN,PTI)),((FCA,AJU),(LYP,LLY)));	1
chrA2	4	123318753	123748999	4.30246	((PLE,(PUN,PTI)),(AJU,(FCA,(LYP,LLY))));	2
chrA2	16	123749090	125341118	15.9203	((PLE,(PUN,PTI)),(FCA,(AJU,(LYP,LLY))));	3
chrA2	0	125341126	125463809	1.22683	((PLE,(PUN,PTI)),(AJU,(FCA,(LYP,LLY))));	2
chrA2	16	125463881	125673308	2.09427	((PLE,(PUN,PTI)),((FCA,AJU),(LYP,LLY)));	1
chrA2	4	125673315	130594534	49.2122	((PLE,(PUN,PTI)),(AJU,(FCA,(LYP,LLY))));	2
chrA2	24	130595064	130607803	0.12739	((PTI,(PLE,PUN)),((FCA,AJU),(LYP,LLY)));	4
chrA2	0	130607913	130718798	1.10885	((PUN,(PLE,PTI)),((FCA,AJU),(LYP,LLY)));	5
chrA2	4	130719422	130809585	0.90163	((PUN,(PLE,PTI)),(FCA,(AJU,(LYP,LLY))));	8
chrA2	0	130809603	131081379	2.71776	((PLE,(PUN,PTI)),(AJU,(FCA,(LYP,LLY))));	2
chrA2	4	131081513	133033479	19.5197	((PLE,(PUN,PTI)),(AJU,(FCA,(LYP,LLY))));	2
chrA2	0	133033521	133189681	1.5616	((PLE,(PUN,PTI)),(FCA,(AJU,(LYP,LLY))));	3
chrA2	4	133189693	133776640	5.86947	((PLE,(PUN,PTI)),(AJU,(FCA,(LYP,LLY))));	2
chrA2	9	133776654	133811152	0.34498	((PLE,(PUN,PTI)),((FCA,AJU),(LYP,LLY)));	1
chrA2	0	133811167	134747790	9.36623	((PLE,(PUN,PTI)),(AJU,(FCA,(LYP,LLY))));	2
chrA2	4	134747829	135599236	8.51407	((PLE,(PUN,PTI)),(AJU,(FCA,(LYP,LLY))));	2
chrA2	0	135599570	135744690	1.4512	((PLE,(PUN,PTI)),(AJU,(FCA,(LYP,LLY))));	2
chrA2	4	135744703	135938746	1.94043	((PLE,(PUN,PTI)),(AJU,(FCA,(LYP,LLY))));	2
chrA2	0	135939017	136146811	2.07794	((PLE,(PUN,PTI)),(FCA,(AJU,(LYP,LLY))));	3
chrA2	9	136146894	136163721	0.16827	((PTI,(PLE,PUN)),((FCA,AJU),(LYP,LLY)));	4
chrA2	4	136163781	138846722	26.8294	((PLE,(PUN,PTI)),(AJU,(FCA,(LYP,LLY))));	2
chrA2	0	138846725	138880117	0.33392	((PLE,(PUN,PTI)),(AJU,(FCA,(LYP,LLY))));	2
chrA2	9	138880124	138924904	0.4478	((PTI,(PLE,PUN)),((FCA,AJU),(LYP,LLY)));	4
chrA2	4	138924926	139999105	10.7418	((PLE,(PUN,PTI)),(AJU,(FCA,(LYP,LLY))));	2
chrA2	16	139999136	141535965	15.3683	((PLE,(PUN,PTI)),(AJU,(FCA,(LYP,LLY))));	2
chrA2	4	141536518	142078585	5.42067	((PLE,(PUN,PTI)),((FCA,AJU),(LYP,LLY)));	1
chrA2	16	142078894	142561797	4.82903	((PLE,(PUN,PTI)),((FCA,AJU),(LYP,LLY)));	1
chrA2	4	142561911	143437110	8.75199	((PLE,(PUN,PTI)),(FCA,(AJU,(LYP,LLY))));	3
chrA2	0	143437113	143787623	3.5051	((PLE,(PUN,PTI)),(AJU,(FCA,(LYP,LLY))));	2
chrA2	4	143787670	144505102	7.17432	((PLE,(PUN,PTI)),(AJU,(FCA,(LYP,LLY))));	2
chrA2	16	144505127	145053004	5.47877	((PLE,(PUN,PTI)),((FCA,AJU),(LYP,LLY)));	1
chrA2	4	145053058	146691468	16.3841	((PLE,(PUN,PTI)),(AJU,(FCA,(LYP,LLY))));	2
chrA2	16	146691473	149459387	27.6791	((PLE,(PUN,PTI)),(AJU,(FCA,(LYP,LLY))));	2
chrA2	7	149459389	149460152	0.00763	((PUN,(PLE,PTI)),(FCA,(AJU,(LYP,LLY))));	8
chrA2	16	149460181	150086603	6.26422	((PLE,(PUN,PTI)),(AJU,(FCA,(LYP,LLY))));	2
chrA2	0	150086604	150167260	0.80656	((PLE,(PUN,PTI)),((FCA,AJU),(LYP,LLY)));	1
chrA2	16	150167632	150299864	1.32232	((PLE,(PUN,PTI)),(FCA,(AJU,(LYP,LLY))));	3
chrA2	7	150299901	150303534	0.03633	((PLE,(PUN,PTI)),(AJU,(FCA,(LYP,LLY))));	2
chrA2	16	150303543	153257851	29.5431	((PLE,(PUN,PTI)),((FCA,AJU),(LYP,LLY)));	1
chrA2	4	153257873	153939607	6.81734	((PLE,(PUN,PTI)),(AJU,(FCA,(LYP,LLY))));	2
chrA2	0	153939616	154040399	1.00783	((PLE,(PUN,PTI)),(FCA,(AJU,(LYP,LLY))));	3
chrA2	4	154040444	154497230	4.56786	((PLE,(PUN,PTI)),(AJU,(FCA,(LYP,LLY))));	2
chrA2	10	154497322	154609259	1.11937	((PLE,(PUN,PTI)),(FCA,(AJU,(LYP,LLY))));	3
chrA2	16	154609296	155561618	9.52322	((PLE,(PUN,PTI)),((FCA,AJU),(LYP,LLY)));	1
chrA2	24	155561628	155588495	0.26867	((PUN,(PLE,PTI)),((FCA,AJU),(LYP,LLY)));	5
chrA2	4	155588510	156227722	6.39212	((PLE,(PUN,PTI)),(FCA,(AJU,(LYP,LLY))));	3
chrA2	9	156229095	156254219	0.25124	((PUN,(PLE,PTI)),((FCA,AJU),(LYP,LLY)));	5
chrA2	10	156254262	156268762	0.145	((PLE,(PUN,PTI)),(FCA,(AJU,(LYP,LLY))));	3
chrA2	4	156268779	156533340	2.64561	((PLE,(PUN,PTI)),((FCA,AJU),(LYP,LLY)));	1
chrA2	16	156533512	160879285	43.4577	((PLE,(PUN,PTI)),((FCA,AJU),(LYP,LLY)));	1
chrA2	0	160879473	160988606	1.09133	((PLE,(PUN,PTI)),((FCA,AJU),(LYP,LLY)));	1
chrA2	16	160989129	161182461	1.93332	((PLE,(PUN,PTI)),((FCA,AJU),(LYP,LLY)));	1
chrA2	4	161182517	162702649	15.2013	((PLE,(PUN,PTI)),(AJU,(FCA,(LYP,LLY))));	2
chrA2	10	162702673	162772081	0.69408	((PLE,(PUN,PTI)),((FCA,AJU),(LYP,LLY)));	1
chrA2	16	162772086	163290374	5.18288	((PLE,(PUN,PTI)),(AJU,(FCA,(LYP,LLY))));	2
chrA2	0	163290394	163585719	2.95325	((PLE,(PUN,PTI)),(AJU,(FCA,(LYP,LLY))));	2
chrA2	16	163585726	164982223	13.965	((PLE,(PUN,PTI)),((FCA,AJU),(LYP,LLY)));	1
chrA2	7	164982224	164983932	0.01708	((PLE,(PUN,PTI)),(FCA,(AJU,(LYP,LLY))));	3
chrA2	16	164983950	165397657	4.13707	((PLE,(PUN,PTI)),((FCA,AJU),(LYP,LLY)));	1
chrA2	7	165397952	165398691	0.00739	((PLE,(PUN,PTI)),(FCA,(AJU,(LYP,LLY))));	21
chrA2	16	165398755	165614523	2.15768	((PLE,(PUN,PTI)),((FCA,AJU),(LYP,LLY)));	1
chrA2	10	165614629	165865299	2.5067	((PLE,(PUN,PTI)),((FCA,AJU),(LYP,LLY)));	1
chrA2	16	165865330	165905905	0.40575	((PLE,(PUN,PTI)),(FCA,(AJU,(LYP,LLY))));	3
chrA2	10	165905931	166098897	1.92966	((PLE,(PUN,PTI)),((FCA,AJU),(LYP,LLY)));	1
chrA2	16	166098968	166486601	3.87633	((PLE,(PUN,PTI)),(FCA,(AJU,(LYP,LLY))));	3
chrA2	7	166486643	166487476	0.00833	((PTI,(PLE,PUN)),(AJU,(FCA,(LYP,LLY))));	6
chrA2	4	166487498	166754399	2.66901	((PLE,(PUN,PTI)),(AJU,(FCA,(LYP,LLY))));	2
chrA2	7	166754476	166754824	0.00348	((PUN,(PLE,PTI)),((FCA,AJU),(LYP,LLY)));	5
chrA2	16	166754831	166906810	1.51979	((PLE,(PUN,PTI)),(AJU,(FCA,(LYP,LLY))));	2
chrA2	10	166906858	166963850	0.56992	((PLE,(PUN,PTI)),((FCA,AJU),(LYP,LLY)));	1
chrA2	16	166963863	167015463	0.516	((PLE,(PUN,PTI)),((FCA,AJU),(LYP,LLY)));	1
chrA2	10	167015472	167148835	1.33363	((PLE,(PUN,PTI)),((FCA,AJU),(LYP,LLY)));	1
chrA2	4	167149349	167187147	0.37798	((PLE,(PUN,PTI)),((FCA,AJU),(LYP,LLY)));	1
chrA2	10	167187180	167353324	1.66144	((PLE,(PUN,PTI)),(AJU,(FCA,(LYP,LLY))));	2
chrA2	16	167353370	167382052	0.28682	((PLE,(PUN,PTI)),((FCA,AJU),(LYP,LLY)));	1
chrA2	10	167382081	167613456	2.31375	((PLE,(PUN,PTI)),(AJU,(FCA,(LYP,LLY))));	2
chrA2	4	167613463	167700439	0.86976	((PLE,(PUN,PTI)),(AJU,(FCA,(LYP,LLY))));	2
chrA2	10	167700467	167723753	0.23286	((PLE,(PUN,PTI)),(FCA,(AJU,(LYP,LLY))));	3
chrA2	7	167723827	167724673	0.00846	((PUN,(PLE,PTI)),(AJU,(FCA,(LYP,LLY))));	7
chrA2	4	167724680	167838504	1.13824	((PLE,(PUN,PTI)),(AJU,(FCA,(LYP,LLY))));	2
chrA2	7	167838567	167839685	0.01118	((PLE,(PUN,PTI)),(AJU,(FCA,(LYP,LLY))));	2
chrA2	4	167839688	168077722	2.38034	((PLE,(PUN,PTI)),((FCA,AJU),(LYP,LLY)));	1
chrA2	7	168077733	168079251	0.01518	((PLE,(PUN,PTI)),(AJU,(FCA,(LYP,LLY))));	2
chrA2	4	168079316	168369340	2.90024	((PLE,(PUN,PTI)),(FCA,(AJU,(LYP,LLY))));	3
chrA2	16	168369430	168543675	1.74245	((PLE,(PUN,PTI)),(FCA,(AJU,(LYP,LLY))));	3
chrA2	0	168543707	168637887	0.9418	((PLE,(PUN,PTI)),(FCA,(AJU,(LYP,LLY))));	3
chrA3	15	10394	65110	0.54716	((PLE,(PUN,PTI)),((FCA,AJU),(LYP,LLY)));	1
chrA3	29	65239	107845	0.42606	((PLE,(PUN,PTI)),((FCA,AJU),(LYP,LLY)));	70
chrA3	24	107864	130629	0.22765	((PTI,(PLE,PUN)),(AJU,(FCA,(LYP,LLY))));	6
chrA3	34	131549	150576	0.19027	((PTI,(PLE,PUN)),(AJU,(FCA,(LYP,LLY))));	6
chrA3	3	151096	282568	1.31472	((PLE,(PUN,PTI)),(AJU,(FCA,(LYP,LLY))));	2
chrA3	18	282641	357808	0.75167	((PLE,(PUN,PTI)),(AJU,(FCA,(LYP,LLY))));	2
chrA3	11	357863	414219	0.56356	((PTI,(PLE,PUN)),(FCA,(AJU,(LYP,LLY))));	9
chrA3	15	414307	460222	0.45915	((PLE,(PUN,PTI)),((FCA,AJU),(LYP,LLY)));	1
chrA3	11	460559	516805	0.56246	((PLE,(PUN,PTI)),((FCA,AJU),(LYP,LLY)));	1
chrA3	15	516898	664203	1.47305	((PLE,(PUN,PTI)),(AJU,(FCA,(LYP,LLY))));	2
chrA3	0	664236	683415	0.19179	((PLE,(PUN,PTI)),((FCA,AJU),(LYP,LLY)));	1
chrA3	15	683536	1998601	13.1507	((PLE,(PUN,PTI)),(AJU,(FCA,(LYP,LLY))));	2
chrA3	5	1998648	2462292	4.63644	((PLE,(PUN,PTI)),(AJU,(FCA,(LYP,LLY))));	2
chrA3	0	2462304	3185766	7.23462	((PLE,(PUN,PTI)),((FCA,AJU),(LYP,LLY)));	1
chrA3	31	3185795	3263093	0.77298	((PTI,(PLE,PUN)),((FCA,AJU),(LYP,LLY)));	4
chrA3	0	3263097	3546008	2.82911	((PLE,(PUN,PTI)),((FCA,AJU),(LYP,LLY)));	1
chrA3	5	3546081	4634441	10.8836	((PLE,(PUN,PTI)),(AJU,(FCA,(LYP,LLY))));	2
chrA3	18	4634726	4651408	0.16682	((PUN,(PLE,PTI)),(AJU,(FCA,(LYP,LLY))));	7
chrA3	5	4651482	4866726	2.15244	((PLE,(PUN,PTI)),(AJU,(FCA,(LYP,LLY))));	2
chrA3	21	4866765	4867332	0.00567	((PTI,(PLE,PUN)),(FCA,(AJU,(LYP,LLY))));	9
chrA3	18	4867338	4899608	0.3227	((PLE,(PUN,PTI)),(AJU,(FCA,(LYP,LLY))));	2
chrA3	5	4899611	4948349	0.48738	((PLE,(PUN,PTI)),((FCA,AJU),(LYP,LLY)));	1
chrA3	15	4948394	5082168	1.33774	((PLE,(PUN,PTI)),((FCA,AJU),(LYP,LLY)));	1
chrA3	5	5082231	5149567	0.67336	((PLE,(PUN,PTI)),((FCA,AJU),(LYP,LLY)));	1
chrA3	13	5149589	5179067	0.29478	((PLE,(PUN,PTI)),((FCA,AJU),(LYP,LLY)));	1
chrA3	5	5179120	5417718	2.38598	((PLE,(PUN,PTI)),(AJU,(FCA,(LYP,LLY))));	2
chrA3	15	5417723	5579757	1.62034	((PLE,(PUN,PTI)),(AJU,(FCA,(LYP,LLY))));	2
chrA3	24	5579823	5579987	0.00164	((PLE,(PUN,PTI)),(AJU,(FCA,(LYP,LLY))));	15
chrA3	5	5580039	6478053	8.98014	((PLE,(PUN,PTI)),(AJU,(FCA,(LYP,LLY))));	2
chrA3	13	6478131	6505246	0.27115	((PLE,(PUN,PTI)),(AJU,(FCA,(LYP,LLY))));	2
chrA3	5	6505328	7046969	5.41641	((PLE,(PUN,PTI)),(AJU,(FCA,(LYP,LLY))));	2
chrA3	0	7047024	7232004	1.8498	((PLE,(PUN,PTI)),(AJU,(FCA,(LYP,LLY))));	2
chrA3	5	7232381	7469215	2.36834	((PLE,(PUN,PTI)),(AJU,(FCA,(LYP,LLY))));	2
chrA3	0	7469233	8517447	10.4821	((PLE,(PUN,PTI)),(AJU,(FCA,(LYP,LLY))));	2
chrA3	5	8517528	8796477	2.78949	((PLE,(PUN,PTI)),(AJU,(FCA,(LYP,LLY))));	2
chrA3	0	8796549	9161621	3.65072	((PLE,(PUN,PTI)),((FCA,AJU),(LYP,LLY)));	1
chrA3	5	9161650	11059381	18.9773	((PLE,(PUN,PTI)),(AJU,(FCA,(LYP,LLY))));	2
chrA3	18	11059415	11114824	0.55409	((PLE,(PUN,PTI)),(AJU,(FCA,(LYP,LLY))));	2
chrA3	5	11114862	11313321	1.98459	((PLE,(PUN,PTI)),(FCA,(AJU,(LYP,LLY))));	3
chrA3	18	11313917	11394562	0.80645	((PLE,(PUN,PTI)),(FCA,(AJU,(LYP,LLY))));	3
chrA3	5	11394685	12382696	9.88011	((PLE,(PUN,PTI)),(AJU,(FCA,(LYP,LLY))));	2
chrA3	13	12382748	12415140	0.32392	((PTI,(PLE,PUN)),((FCA,AJU),(LYP,LLY)));	4
chrA3	11	12415162	12578809	1.63647	((PLE,(PUN,PTI)),(AJU,(FCA,(LYP,LLY))));	2
chrA3	5	12579008	12972038	3.9303	((PLE,(PUN,PTI)),(FCA,(AJU,(LYP,LLY))));	3
chrA3	0	12972163	13424784	4.52621	((PLE,(PUN,PTI)),((FCA,AJU),(LYP,LLY)));	1
chrA3	5	13424850	14397995	9.73145	((PLE,(PUN,PTI)),((FCA,AJU),(LYP,LLY)));	1
chrA3	0	14398330	14707879	3.09549	((PLE,(PUN,PTI)),(FCA,(AJU,(LYP,LLY))));	3
chrA3	5	14707888	15190621	4.82733	((PLE,(PUN,PTI)),(AJU,(FCA,(LYP,LLY))));	2
chrA3	0	15190639	16111096	9.20457	((PLE,(PUN,PTI)),((FCA,AJU),(LYP,LLY)));	1
chrA3	3	16111119	16240488	1.29369	((PLE,(PUN,PTI)),(FCA,(AJU,(LYP,LLY))));	3
chrA3	18	16240499	16273031	0.32532	((PLE,(PUN,PTI)),(AJU,(FCA,(LYP,LLY))));	2
chrA3	0	16273056	17546730	12.7367	((PLE,(PUN,PTI)),(AJU,(FCA,(LYP,LLY))));	2
chrA3	3	17546744	17852390	3.05646	((PLE,(PUN,PTI)),(FCA,(AJU,(LYP,LLY))));	3
chrA3	0	17852464	18632669	7.80205	((PLE,(PUN,PTI)),(AJU,(FCA,(LYP,LLY))));	2
chrA3	3	18632938	18814785	1.81847	((PUN,(PLE,PTI)),((FCA,AJU),(LYP,LLY)));	5
chrA3	18	18814790	19228271	4.13481	((PLE,(PUN,PTI)),(AJU,(FCA,(LYP,LLY))));	2
chrA3	0	19228301	21633178	24.0488	((PLE,(PUN,PTI)),((FCA,AJU),(LYP,LLY)));	1
chrA3	5	21633205	22231123	5.97918	((PLE,(PUN,PTI)),(AJU,(FCA,(LYP,LLY))));	2
chrA3	0	22231288	22714805	4.83517	((PLE,(PUN,PTI)),(FCA,(AJU,(LYP,LLY))));	3
chrA3	3	22715018	23411109	6.96091	((PLE,(PUN,PTI)),((FCA,AJU),(LYP,LLY)));	1
chrA3	11	23411159	23760678	3.49519	((PTI,(PLE,PUN)),((FCA,AJU),(LYP,LLY)));	4
chrA3	2	23760717	23771982	0.11265	((PTI,(PLE,PUN)),((FCA,AJU),(LYP,LLY)));	4
chrA3	15	23772056	23823156	0.511	((PLE,(PUN,PTI)),((FCA,AJU),(LYP,LLY)));	1
chrA3	3	23823362	24105625	2.82263	((PLE,(PUN,PTI)),((FCA,AJU),(LYP,LLY)));	1
chrA3	11	24105940	24603789	4.97849	((PLE,(PUN,PTI)),(AJU,(FCA,(LYP,LLY))));	2
chrA3	5	24603838	24675087	0.71249	((PLE,(PUN,PTI)),(AJU,(FCA,(LYP,LLY))));	2
chrA3	18	24675431	24829122	1.53691	((PTI,(PLE,PUN)),(AJU,(FCA,(LYP,LLY))));	6
chrA3	0	24829142	24893969	0.64827	((PLE,(PUN,PTI)),((FCA,AJU),(LYP,LLY)));	1
chrA3	18	24893974	24925940	0.31966	((PLE,(PUN,PTI)),(AJU,(FCA,(LYP,LLY))));	2
chrA3	13	24925954	25059843	1.33889	((PLE,(PUN,PTI)),((FCA,AJU),(LYP,LLY)));	1
chrA3	8	25059868	25063919	0.04051	((PLE,(PUN,PTI)),(AJU,(FCA,(LYP,LLY))));	33
chrA3	11	25064156	25195878	1.31722	((PLE,(PUN,PTI)),((FCA,AJU),(LYP,LLY)));	1
chrA3	0	25195891	26142451	9.4656	((PLE,(PUN,PTI)),(AJU,(FCA,(LYP,LLY))));	2
chrA3	3	26142460	26769320	6.2686	((PLE,(PUN,PTI)),(AJU,(FCA,(LYP,LLY))));	2
chrA3	0	26769501	27088343	3.18842	((PLE,(PUN,PTI)),((FCA,AJU),(LYP,LLY)));	1
chrA3	11	27088371	27132533	0.44162	((PTI,(PLE,PUN)),(FCA,(AJU,(LYP,LLY))));	9
chrA3	0	27132535	28619466	14.8693	((PLE,(PUN,PTI)),((FCA,AJU),(LYP,LLY)));	1
chrA3	29	28619844	28667919	0.48075	((PLE,(PUN,PTI)),(AJU,(FCA,(LYP,LLY))));	15
chrA3	0	28667938	29698256	10.3032	((PLE,(PUN,PTI)),((FCA,AJU),(LYP,LLY)));	1
chrA3	3	29698463	29944347	2.45884	((PLE,(PUN,PTI)),(FCA,(AJU,(LYP,LLY))));	3
chrA3	18	29944403	29979879	0.35476	((PLE,(PUN,PTI)),(AJU,(FCA,(LYP,LLY))));	2
chrA3	0	29980164	31393520	14.1336	((PLE,(PUN,PTI)),((FCA,AJU),(LYP,LLY)));	1
chrA3	2	31393619	31401940	0.08321	((PLE,(PUN,PTI)),((FCA,AJU),(LYP,LLY)));	1
chrA3	3	31402027	31627166	2.25139	((PLE,(PUN,PTI)),(AJU,(FCA,(LYP,LLY))));	2
chrA3	0	31627293	32398232	7.70939	((PLE,(PUN,PTI)),(AJU,(FCA,(LYP,LLY))));	2
chrA3	3	32398290	34182853	17.8456	((PLE,(PUN,PTI)),((FCA,AJU),(LYP,LLY)));	1
chrA3	11	34182943	34425473	2.4253	((PTI,(PLE,PUN)),(AJU,(FCA,(LYP,LLY))));	6
chrA3	2	34425480	34434361	0.08881	((PTI,(PLE,PUN)),((FCA,AJU),(LYP,LLY)));	4
chrA3	3	34434459	34985005	5.50546	((PLE,(PUN,PTI)),((FCA,AJU),(LYP,LLY)));	1
chrA3	18	34986282	35031365	0.45083	((PLE,(PUN,PTI)),(FCA,(AJU,(LYP,LLY))));	3
chrA3	3	35031370	35739303	7.07933	((PLE,(PUN,PTI)),(AJU,(FCA,(LYP,LLY))));	2
chrA3	18	35739306	35845742	1.06436	((PLE,(PUN,PTI)),(AJU,(FCA,(LYP,LLY))));	2
chrA3	3	35845902	36357825	5.11923	((PLE,(PUN,PTI)),(AJU,(FCA,(LYP,LLY))));	2
chrA3	18	36357834	36386784	0.2895	((PLE,(PUN,PTI)),(AJU,(FCA,(LYP,LLY))));	2
chrA3	3	36387225	36459863	0.72638	((PLE,(PUN,PTI)),((FCA,AJU),(LYP,LLY)));	1
chrA3	11	36459962	36810936	3.50974	((PUN,(PLE,PTI)),(FCA,(AJU,(LYP,LLY))));	8
chrA3	3	36811223	37336300	5.25077	((PLE,(PUN,PTI)),(AJU,(FCA,(LYP,LLY))));	2
chrA3	11	37336327	37549495	2.13168	((PLE,(PUN,PTI)),(AJU,(FCA,(LYP,LLY))));	2
chrA3	3	37549524	38330649	7.81125	((PLE,(PUN,PTI)),((FCA,AJU),(LYP,LLY)));	1
chrA3	11	38330773	38592312	2.61539	((PLE,(PUN,PTI)),(FCA,(AJU,(LYP,LLY))));	3
chrA3	3	38592319	39081958	4.89639	((PLE,(PUN,PTI)),(AJU,(FCA,(LYP,LLY))));	2
chrA3	2	39081973	39117592	0.35619	((PLE,(PUN,PTI)),((FCA,AJU),(LYP,LLY)));	1
chrA3	11	39117816	39876259	7.58443	((PLE,(PUN,PTI)),(AJU,(FCA,(LYP,LLY))));	2
chrA3	2	39876328	39890512	0.14184	((PLE,(PUN,PTI)),((FCA,AJU),(LYP,LLY)));	1
chrA3	11	39890514	40048373	1.57859	((PLE,(PUN,PTI)),(AJU,(FCA,(LYP,LLY))));	2
chrA3	3	40048513	41319269	12.7076	((PLE,(PUN,PTI)),((FCA,AJU),(LYP,LLY)));	1
chrA3	18	41319283	41357593	0.3831	((PLE,(PUN,PTI)),(FCA,(AJU,(LYP,LLY))));	3
chrA3	13	41357596	41380143	0.22547	((PUN,(PLE,PTI)),(FCA,(AJU,(LYP,LLY))));	8
chrA3	3	41380144	41988168	6.08024	((PLE,(PUN,PTI)),(AJU,(FCA,(LYP,LLY))));	2
chrA3	0	41988230	42905059	9.16829	((PLE,(PUN,PTI)),((FCA,AJU),(LYP,LLY)));	1
chrA3	18	42905067	42930599	0.25532	((PLE,(PUN,PTI)),(AJU,(FCA,(LYP,LLY))));	2
chrA3	3	42930601	43024096	0.93495	((PLE,(PUN,PTI)),(AJU,(FCA,(LYP,LLY))));	2
chrA3	18	43024118	43083992	0.59874	((PLE,(PUN,PTI)),(AJU,(FCA,(LYP,LLY))));	2
chrA3	3	43084066	43384574	3.00508	((PLE,(PUN,PTI)),(FCA,(AJU,(LYP,LLY))));	3
chrA3	2	43384627	43396938	0.12311	((PLE,(PUN,PTI)),((FCA,AJU),(LYP,LLY)));	1
chrA3	18	43396989	43424941	0.27952	((PLE,(PUN,PTI)),(FCA,(AJU,(LYP,LLY))));	3
chrA3	3	43425003	43703942	2.78939	((PLE,(PUN,PTI)),((FCA,AJU),(LYP,LLY)));	1
chrA3	11	43703972	44022064	3.18092	((PUN,(PLE,PTI)),((FCA,AJU),(LYP,LLY)));	5
chrA3	3	44022071	44265290	2.43219	((PLE,(PUN,PTI)),(AJU,(FCA,(LYP,LLY))));	2
chrA3	2	44265322	44295655	0.30333	((PLE,(PUN,PTI)),((FCA,AJU),(LYP,LLY)));	1
chrA3	3	44295822	44624486	3.28664	((PLE,(PUN,PTI)),(AJU,(FCA,(LYP,LLY))));	2
chrA3	11	44624520	44825854	2.01334	((PLE,(PUN,PTI)),(AJU,(FCA,(LYP,LLY))));	2
chrA3	0	44825961	44944792	1.18831	((PLE,(PUN,PTI)),((FCA,AJU),(LYP,LLY)));	1
chrA3	11	44944858	45493747	5.48889	((PLE,(PUN,PTI)),(FCA,(AJU,(LYP,LLY))));	3
chrA3	18	45493906	45592345	0.98439	((PLE,(PUN,PTI)),(FCA,(AJU,(LYP,LLY))));	3
chrA3	5	45592536	45650253	0.57717	((PLE,(PUN,PTI)),((FCA,AJU),(LYP,LLY)));	1
chrA3	13	45650291	45672413	0.22122	((PUN,(PLE,PTI)),((FCA,AJU),(LYP,LLY)));	5
chrA3	11	45672508	46547150	8.74642	((PLE,(PUN,PTI)),(AJU,(FCA,(LYP,LLY))));	2
chrA3	2	46548102	46571121	0.23019	((PUN,(PLE,PTI)),((FCA,AJU),(LYP,LLY)));	5
chrA3	11	46571137	46777459	2.06322	((PTI,(PLE,PUN)),((FCA,AJU),(LYP,LLY)));	4
chrA3	18	46777845	47062158	2.84313	((PLE,(PUN,PTI)),(FCA,(AJU,(LYP,LLY))));	3
chrA3	11	47062159	47245078	1.82919	((PTI,(PLE,PUN)),(AJU,(FCA,(LYP,LLY))));	6
chrA3	3	47245086	47385098	1.40012	((PLE,(PUN,PTI)),((FCA,AJU),(LYP,LLY)));	1
chrA3	11	47385108	47708173	3.23065	((PUN,(PLE,PTI)),(AJU,(FCA,(LYP,LLY))));	7
chrA3	2	47708174	47719582	0.11408	((PUN,(PLE,PTI)),((FCA,AJU),(LYP,LLY)));	5
chrA3	11	47719744	47891245	1.71501	((PLE,(PUN,PTI)),((FCA,AJU),(LYP,LLY)));	1
chrA3	18	47891284	47925125	0.33841	((PLE,(PUN,PTI)),(FCA,(AJU,(LYP,LLY))));	3
chrA3	2	47925155	47954644	0.29489	((PLE,(PUN,PTI)),((FCA,AJU),(LYP,LLY)));	1
chrA3	11	47954851	48000159	0.45308	((PTI,(PLE,PUN)),(FCA,(AJU,(LYP,LLY))));	9
chrA3	2	48000257	48036237	0.3598	((PLE,(PUN,PTI)),((FCA,AJU),(LYP,LLY)));	1
chrA3	11	48036263	48127965	0.91702	((PLE,(PUN,PTI)),((FCA,AJU),(LYP,LLY)));	1
chrA3	2	48127975	48161608	0.33633	((PTI,(PLE,PUN)),((FCA,AJU),(LYP,LLY)));	4
chrA3	18	48161726	48252751	0.91025	((PLE,(PUN,PTI)),(FCA,(AJU,(LYP,LLY))));	3
chrA3	11	48252873	48430101	1.77228	((PLE,(PUN,PTI)),(AJU,(FCA,(LYP,LLY))));	2
chrA3	2	48430728	48460813	0.30085	((PLE,(PUN,PTI)),((FCA,AJU),(LYP,LLY)));	1
chrA3	18	48460820	49146839	6.86019	((PUN,(PLE,PTI)),(FCA,(AJU,(LYP,LLY))));	8
chrA3	11	49146851	49602505	4.55654	((PLE,(PUN,PTI)),(AJU,(FCA,(LYP,LLY))));	2
chrA3	2	49602527	49633555	0.31028	((PUN,(PLE,PTI)),((FCA,AJU),(LYP,LLY)));	5
chrA3	11	49633721	50079797	4.46076	((PUN,(PLE,PTI)),(AJU,(FCA,(LYP,LLY))));	7
chrA3	13	50079871	50122265	0.42394	((PLE,(PUN,PTI)),((FCA,AJU),(LYP,LLY)));	1
chrA3	11	50122337	50645801	5.23464	((PLE,(PUN,PTI)),((FCA,AJU),(LYP,LLY)));	1
chrA3	11	50650637	50667679	0.17042	((PTI,(PLE,PUN)),(FCA,(AJU,(LYP,LLY))));	9
chrA3	13	50667700	50784144	1.16444	((PLE,(PUN,PTI)),((FCA,AJU),(LYP,LLY)));	1
chrA3	11	50792692	51245823	4.53131	((PTI,(PLE,PUN)),((FCA,AJU),(LYP,LLY)));	4
chrA3	18	51245834	51552839	3.07005	((PTI,(PLE,PUN)),(AJU,(FCA,(LYP,LLY))));	6
chrA3	11	51552878	52554070	10.0119	((PLE,(PUN,PTI)),(AJU,(FCA,(LYP,LLY))));	2
chrA3	2	52554109	52588496	0.34387	((PTI,(PLE,PUN)),((FCA,AJU),(LYP,LLY)));	4
chrA3	11	52588508	52945769	3.57261	((PLE,(PUN,PTI)),(AJU,(FCA,(LYP,LLY))));	2
chrA3	18	52946070	53074196	1.28126	((PLE,(PUN,PTI)),(AJU,(FCA,(LYP,LLY))));	2
chrA3	0	53074205	53141528	0.67323	((PLE,(PUN,PTI)),(FCA,(AJU,(LYP,LLY))));	3
chrA3	18	53141686	53234941	0.93255	((PTI,(PLE,PUN)),(FCA,(AJU,(LYP,LLY))));	9
chrA3	3	53234951	53699788	4.64837	((PLE,(PUN,PTI)),((FCA,AJU),(LYP,LLY)));	1
chrA3	13	53700138	53754749	0.54611	((PUN,(PLE,PTI)),(AJU,(FCA,(LYP,LLY))));	7
chrA3	3	53754755	53968414	2.13659	((PLE,(PUN,PTI)),(FCA,(AJU,(LYP,LLY))));	3
chrA3	35	53968432	53974024	0.05592	((PTI,(PLE,PUN)),((FCA,AJU),(LYP,LLY)));	4
chrA3	0	53974059	58164928	41.9087	((PLE,(PUN,PTI)),((FCA,AJU),(LYP,LLY)));	1
chrA3	11	58165126	58704569	5.39443	((PLE,(PUN,PTI)),((FCA,AJU),(LYP,LLY)));	1
chrA3	0	58704572	58795651	0.91079	((PLE,(PUN,PTI)),((FCA,AJU),(LYP,LLY)));	1
chrA3	18	58795670	58866779	0.71109	((PLE,(PUN,PTI)),((FCA,AJU),(LYP,LLY)));	1
chrA3	3	58866862	59047949	1.81087	((PLE,(PUN,PTI)),(FCA,(AJU,(LYP,LLY))));	3
chrA3	0	59047960	59168989	1.21029	((PLE,(PUN,PTI)),((FCA,AJU),(LYP,LLY)));	1
chrA3	11	59169019	59293609	1.2459	((PTI,(PLE,PUN)),(AJU,(FCA,(LYP,LLY))));	6
chrA3	0	59293614	59382350	0.88736	((PLE,(PUN,PTI)),(AJU,(FCA,(LYP,LLY))));	2
chrA3	18	59382468	59396645	0.14177	((PLE,(PUN,PTI)),(FCA,(AJU,(LYP,LLY))));	3
chrA3	3	59396653	59906798	5.10145	((PLE,(PUN,PTI)),((FCA,AJU),(LYP,LLY)));	1
chrA3	11	59906945	60094448	1.87503	((PLE,(PUN,PTI)),((FCA,AJU),(LYP,LLY)));	1
chrA3	3	60094484	60400807	3.06323	((PLE,(PUN,PTI)),(AJU,(FCA,(LYP,LLY))));	2
chrA3	11	60400968	60623688	2.2272	((PTI,(PLE,PUN)),(AJU,(FCA,(LYP,LLY))));	6
chrA3	13	60624005	60656292	0.32287	((PUN,(PLE,PTI)),((FCA,AJU),(LYP,LLY)));	5
chrA3	18	60656301	60671726	0.15425	((PLE,(PUN,PTI)),(FCA,(AJU,(LYP,LLY))));	3
chrA3	31	60671818	60720893	0.49075	((PTI,(PLE,PUN)),(FCA,(AJU,(LYP,LLY))));	9
chrA3	3	60720924	61418946	6.98022	((PLE,(PUN,PTI)),(FCA,(AJU,(LYP,LLY))));	3
chrA3	18	61418986	61463166	0.4418	((PLE,(PUN,PTI)),(AJU,(FCA,(LYP,LLY))));	2
chrA3	3	61463240	61595063	1.31823	((PLE,(PUN,PTI)),(AJU,(FCA,(LYP,LLY))));	2
chrA3	24	61595069	61598561	0.03492	((PTI,(PLE,PUN)),((FCA,AJU),(LYP,LLY)));	4
chrA3	3	61598781	62367256	7.68475	((PTI,(PLE,PUN)),(AJU,(FCA,(LYP,LLY))));	6
chrA3	18	62367369	62636563	2.69194	((PLE,(PUN,PTI)),(FCA,(AJU,(LYP,LLY))));	3
chrA3	2	62636574	62639502	0.02928	((PLE,(PUN,PTI)),((FCA,AJU),(LYP,LLY)));	1
chrA3	3	62640064	63308221	6.68157	((PLE,(PUN,PTI)),((FCA,AJU),(LYP,LLY)));	1
chrA3	18	63308390	63329582	0.21192	((PTI,(PLE,PUN)),(FCA,(AJU,(LYP,LLY))));	9
chrA3	31	63330195	63370345	0.4015	((PTI,(PLE,PUN)),((FCA,AJU),(LYP,LLY)));	4
chrA3	0	63370366	63593239	2.22873	((PLE,(PUN,PTI)),((FCA,AJU),(LYP,LLY)));	1
chrA3	3	63593285	63705804	1.12519	((PLE,(PUN,PTI)),(AJU,(FCA,(LYP,LLY))));	2
chrA3	18	63706348	63753135	0.46787	((PLE,(PUN,PTI)),(FCA,(AJU,(LYP,LLY))));	3
chrA3	3	63753137	65588157	18.3502	((PLE,(PUN,PTI)),((FCA,AJU),(LYP,LLY)));	1
chrA3	35	65588177	65631102	0.42925	((PTI,(PLE,PUN)),((FCA,AJU),(LYP,LLY)));	4
chrA3	12	65631201	65632207	0.01006	((PLE,(PUN,PTI)),((FCA,AJU),(LYP,LLY)));	55
chrA3	3	65632253	65983912	3.51659	((PLE,(PUN,PTI)),(FCA,(AJU,(LYP,LLY))));	3
chrA3	31	65983913	66003406	0.19493	((PTI,(PLE,PUN)),(FCA,(AJU,(LYP,LLY))));	9
chrA3	0	66003487	66240287	2.368	((PLE,(PUN,PTI)),(AJU,(FCA,(LYP,LLY))));	2
chrA3	11	66240696	66386706	1.4601	((PLE,(PUN,PTI)),((FCA,AJU),(LYP,LLY)));	1
chrA3	3	66387173	66604421	2.17248	((PLE,(PUN,PTI)),((FCA,AJU),(LYP,LLY)));	1
chrA3	18	66604451	66760654	1.56203	((PLE,(PUN,PTI)),((FCA,AJU),(LYP,LLY)));	1
chrA3	3	66760677	66916647	1.5597	((PUN,(PLE,PTI)),(FCA,(AJU,(LYP,LLY))));	8
chrA3	11	66916649	68005983	10.8933	((PLE,(PUN,PTI)),(FCA,(AJU,(LYP,LLY))));	3
chrA3	13	68005990	68042076	0.36086	((PUN,(PLE,PTI)),((FCA,AJU),(LYP,LLY)));	5
chrA3	3	68042104	68192209	1.50105	((PUN,(PLE,PTI)),(AJU,(FCA,(LYP,LLY))));	7
chrA3	18	68192444	68240445	0.48001	((PLE,(PUN,PTI)),(FCA,(AJU,(LYP,LLY))));	3
chrA3	3	68240526	68443643	2.03117	((PLE,(PUN,PTI)),(AJU,(FCA,(LYP,LLY))));	2
chrA3	11	68443694	68636405	1.92711	((PLE,(PUN,PTI)),(AJU,(FCA,(LYP,LLY))));	2
chrA3	24	68636407	68637765	0.01358	((PTI,(PLE,PUN)),(FCA,(AJU,(LYP,LLY))));	9
chrA3	31	68637874	68706307	0.68433	((PTI,(PLE,PUN)),(FCA,(AJU,(LYP,LLY))));	9
chrA3	3	68706477	69879227	11.7275	((PLE,(PUN,PTI)),(AJU,(FCA,(LYP,LLY))));	2
chrA3	35	69879229	69883441	0.04212	((PTI,(PLE,PUN)),((FCA,AJU),(LYP,LLY)));	4
chrA3	3	69883493	70352320	4.68827	((PLE,(PUN,PTI)),((FCA,AJU),(LYP,LLY)));	1
chrA3	11	70352349	70495741	1.43392	((PLE,(PUN,PTI)),(FCA,(AJU,(LYP,LLY))));	3
chrA3	2	70495755	70549764	0.54009	((PTI,(PLE,PUN)),((FCA,AJU),(LYP,LLY)));	4
chrA3	11	70549788	70910428	3.6064	((PLE,(PUN,PTI)),(AJU,(FCA,(LYP,LLY))));	2
chrA3	13	70910515	70964439	0.53924	((PUN,(PLE,PTI)),((FCA,AJU),(LYP,LLY)));	5
chrA3	3	70964446	71721706	7.5726	((PLE,(PUN,PTI)),(AJU,(FCA,(LYP,LLY))));	2
chrA3	18	71721714	71767448	0.45734	((PLE,(PUN,PTI)),(FCA,(AJU,(LYP,LLY))));	3
chrA3	3	71767476	72120823	3.53347	((PLE,(PUN,PTI)),((FCA,AJU),(LYP,LLY)));	1
chrA3	18	72120844	72211116	0.90272	((PLE,(PUN,PTI)),(FCA,(AJU,(LYP,LLY))));	3
chrA3	3	72211235	72246334	0.35099	((PLE,(PUN,PTI)),(AJU,(FCA,(LYP,LLY))));	2
chrA3	2	72246384	72272823	0.26439	((PLE,(PUN,PTI)),((FCA,AJU),(LYP,LLY)));	1
chrA3	3	72272895	72503394	2.30499	((PLE,(PUN,PTI)),(AJU,(FCA,(LYP,LLY))));	2
chrA3	18	72503396	72574530	0.71134	((PUN,(PLE,PTI)),(FCA,(AJU,(LYP,LLY))));	8
chrA3	2	72574579	72597743	0.23164	((PUN,(PLE,PTI)),((FCA,AJU),(LYP,LLY)));	5
chrA3	5	72597782	72650038	0.52256	((PLE,(PUN,PTI)),(FCA,(AJU,(LYP,LLY))));	3
chrA3	11	72650083	72737611	0.87528	((PLE,(PUN,PTI)),(FCA,(AJU,(LYP,LLY))));	3
chrA3	31	72737649	72772984	0.35335	((PTI,(PLE,PUN)),(FCA,(AJU,(LYP,LLY))));	9
chrA3	3	72773422	73153920	3.80498	((PLE,(PUN,PTI)),(AJU,(FCA,(LYP,LLY))));	2
chrA3	18	73153937	73363342	2.09405	((PLE,(PUN,PTI)),(FCA,(AJU,(LYP,LLY))));	3
chrA3	3	73363363	73999702	6.36339	((PLE,(PUN,PTI)),(FCA,(AJU,(LYP,LLY))));	3
chrA3	11	73999739	74272616	2.72877	((PTI,(PLE,PUN)),(AJU,(FCA,(LYP,LLY))));	6
chrA3	3	74272673	75455252	11.8258	((PLE,(PUN,PTI)),(AJU,(FCA,(LYP,LLY))));	2
chrA3	2	75455262	75469606	0.14344	((PTI,(PLE,PUN)),((FCA,AJU),(LYP,LLY)));	4
chrA3	0	75470015	76176285	7.0627	((PLE,(PUN,PTI)),((FCA,AJU),(LYP,LLY)));	1
chrA3	3	76176497	79055371	28.7887	((PLE,(PUN,PTI)),((FCA,AJU),(LYP,LLY)));	1
chrA3	2	79055394	79102658	0.47264	((PLE,(PUN,PTI)),((FCA,AJU),(LYP,LLY)));	1
chrA3	18	79102717	79139591	0.36874	((PLE,(PUN,PTI)),(AJU,(FCA,(LYP,LLY))));	2
chrA3	3	79139597	79328846	1.89249	((PLE,(PUN,PTI)),(AJU,(FCA,(LYP,LLY))));	2
chrA3	35	79328923	79338303	0.0938	((PTI,(PLE,PUN)),((FCA,AJU),(LYP,LLY)));	4
chrA3	11	79338335	79726953	3.88618	((PUN,(PLE,PTI)),(AJU,(FCA,(LYP,LLY))));	7
chrA3	3	79726980	81721648	19.9467	((PLE,(PUN,PTI)),(AJU,(FCA,(LYP,LLY))));	2
chrA3	2	81722549	81816752	0.94203	((PLE,(PUN,PTI)),((FCA,AJU),(LYP,LLY)));	1
chrA3	3	81816818	82040893	2.24075	((PLE,(PUN,PTI)),(AJU,(FCA,(LYP,LLY))));	2
chrA3	0	82040902	82245440	2.04538	((PLE,(PUN,PTI)),((FCA,AJU),(LYP,LLY)));	1
chrA3	11	82245446	82390095	1.44649	((PLE,(PUN,PTI)),(FCA,(AJU,(LYP,LLY))));	3
chrA3	0	82390099	82705521	3.15422	((PLE,(PUN,PTI)),((FCA,AJU),(LYP,LLY)));	1
chrA3	11	82706104	82761997	0.55893	((PLE,(PUN,PTI)),(FCA,(AJU,(LYP,LLY))));	3
chrA3	0	82762149	82929766	1.67617	((PLE,(PUN,PTI)),((FCA,AJU),(LYP,LLY)));	1
chrA3	3	82929879	83435300	5.05421	((PLE,(PUN,PTI)),((FCA,AJU),(LYP,LLY)));	1
chrA3	11	83435352	83733904	2.98552	((PLE,(PUN,PTI)),(AJU,(FCA,(LYP,LLY))));	2
chrA3	3	83733915	84660634	9.26719	((PLE,(PUN,PTI)),((FCA,AJU),(LYP,LLY)));	1
chrA3	13	84660724	84710679	0.49955	((PLE,(PUN,PTI)),((FCA,AJU),(LYP,LLY)));	1
chrA3	3	84710706	85227592	5.16886	((PLE,(PUN,PTI)),(FCA,(AJU,(LYP,LLY))));	3
chrA3	13	85227750	85313495	0.85745	((PUN,(PLE,PTI)),((FCA,AJU),(LYP,LLY)));	5
chrA3	3	85313572	85599499	2.85927	((PLE,(PUN,PTI)),(FCA,(AJU,(LYP,LLY))));	3
chrA3	18	85599571	85686386	0.86815	((PLE,(PUN,PTI)),((FCA,AJU),(LYP,LLY)));	1
chrA3	0	85686415	86712146	10.2573	((PLE,(PUN,PTI)),((FCA,AJU),(LYP,LLY)));	1
chrA3	5	86712432	86880957	1.68525	((PLE,(PUN,PTI)),(AJU,(FCA,(LYP,LLY))));	2
chrA3	35	86882588	86912168	0.2958	((PTI,(PLE,PUN)),((FCA,AJU),(LYP,LLY)));	4
chrA3	3	86912211	87005144	0.92933	((PLE,(PUN,PTI)),((FCA,AJU),(LYP,LLY)));	1
chrA3	35	87005286	87029934	0.24648	((PTI,(PLE,PUN)),((FCA,AJU),(LYP,LLY)));	4
chrA3	11	87029970	87375651	3.45681	((PTI,(PLE,PUN)),(AJU,(FCA,(LYP,LLY))));	6
chrA3	13	87376009	87396075	0.20066	((PUN,(PLE,PTI)),((FCA,AJU),(LYP,LLY)));	5
chrA3	0	87396713	87686125	2.89412	((PLE,(PUN,PTI)),((FCA,AJU),(LYP,LLY)));	1
chrA3	3	87686130	88106741	4.20611	((PLE,(PUN,PTI)),((FCA,AJU),(LYP,LLY)));	1
chrA3	11	88106792	88209214	1.02422	((PLE,(PUN,PTI)),(AJU,(FCA,(LYP,LLY))));	2
chrA3	0	88209237	88346256	1.37019	((PLE,(PUN,PTI)),((FCA,AJU),(LYP,LLY)));	1
chrA3	3	88346307	88672213	3.25906	((PLE,(PUN,PTI)),(AJU,(FCA,(LYP,LLY))));	2
chrA3	0	88672218	89155528	4.8331	((PLE,(PUN,PTI)),(AJU,(FCA,(LYP,LLY))));	2
chrA3	3	89156218	90390688	12.3447	((PLE,(PUN,PTI)),(AJU,(FCA,(LYP,LLY))));	2
chrA3	18	90390707	90444597	0.5389	((PLE,(PUN,PTI)),(FCA,(AJU,(LYP,LLY))));	3
chrA3	3	90445324	90718979	2.73655	((PLE,(PUN,PTI)),((FCA,AJU),(LYP,LLY)));	1
chrA3	18	90719000	90844645	1.25645	((PLE,(PUN,PTI)),(AJU,(FCA,(LYP,LLY))));	2
chrA3	5	90844703	90968671	1.23968	((PUN,(PLE,PTI)),((FCA,AJU),(LYP,LLY)));	5
chrA3	13	90968860	91017342	0.48482	((PTI,(PLE,PUN)),((FCA,AJU),(LYP,LLY)));	4
chrA3	5	91017388	91241948	2.2456	((PLE,(PUN,PTI)),((FCA,AJU),(LYP,LLY)));	1
chrA3	13	91241951	91331439	0.89488	((PUN,(PLE,PTI)),((FCA,AJU),(LYP,LLY)));	5
chrA3	0	91331521	91581356	2.49835	((PLE,(PUN,PTI)),(AJU,(FCA,(LYP,LLY))));	2
chrA3	18	91581384	91598535	0.17151	((PLE,(PUN,PTI)),(FCA,(AJU,(LYP,LLY))));	3
chrA3	13	91600389	91677237	0.76848	((PUN,(PLE,PTI)),((FCA,AJU),(LYP,LLY)));	5
chrA3	15	91677461	91697353	0.19892	((PLE,(PUN,PTI)),(FCA,(AJU,(LYP,LLY))));	3
chrA3	0	91697446	91802165	1.04719	((PLE,(PUN,PTI)),((FCA,AJU),(LYP,LLY)));	1
chrA3	13	91802201	91826226	0.24025	((PUN,(PLE,PTI)),(AJU,(FCA,(LYP,LLY))));	7
chrA3	3	91826271	92772780	9.46509	((PLE,(PUN,PTI)),(AJU,(FCA,(LYP,LLY))));	2
chrA3	13	92772787	92825642	0.52855	((PTI,(PLE,PUN)),((FCA,AJU),(LYP,LLY)));	4
chrA3	3	92826285	93273380	4.47095	((PLE,(PUN,PTI)),(FCA,(AJU,(LYP,LLY))));	3
chrA3	2	93273399	93287828	0.14429	((PLE,(PUN,PTI)),((FCA,AJU),(LYP,LLY)));	1
chrA3	3	93287893	93799381	5.11488	((PLE,(PUN,PTI)),(AJU,(FCA,(LYP,LLY))));	2
chrA3	18	93799419	93909259	1.0984	((PLE,(PUN,PTI)),(FCA,(AJU,(LYP,LLY))));	3
chrA3	3	93909265	94108340	1.99075	((PLE,(PUN,PTI)),((FCA,AJU),(LYP,LLY)));	1
chrA3	11	94108629	94261963	1.53334	((PLE,(PUN,PTI)),(AJU,(FCA,(LYP,LLY))));	2
chrA3	2	94262089	94278012	0.15923	((PLE,(PUN,PTI)),((FCA,AJU),(LYP,LLY)));	1
chrA3	3	94278139	96056756	17.7862	((PLE,(PUN,PTI)),(AJU,(FCA,(LYP,LLY))));	2
chrA3	18	96056823	96113832	0.57009	((PLE,(PUN,PTI)),(FCA,(AJU,(LYP,LLY))));	3
chrA3	35	96113992	96125444	0.11452	((PTI,(PLE,PUN)),((FCA,AJU),(LYP,LLY)));	4
chrA3	3	96125505	97898328	17.7282	((PLE,(PUN,PTI)),(FCA,(AJU,(LYP,LLY))));	3
chrA3	0	97898347	98133892	2.35545	((PLE,(PUN,PTI)),((FCA,AJU),(LYP,LLY)));	1
chrA3	18	98133937	98164301	0.30364	((PLE,(PUN,PTI)),(FCA,(AJU,(LYP,LLY))));	3
chrA3	3	98164342	99625472	14.6113	((PLE,(PUN,PTI)),(AJU,(FCA,(LYP,LLY))));	2
chrA3	0	99625869	99759132	1.33263	((PLE,(PUN,PTI)),((FCA,AJU),(LYP,LLY)));	1
chrA3	3	99759170	100838373	10.792	((PLE,(PUN,PTI)),(AJU,(FCA,(LYP,LLY))));	2
chrA3	11	100838773	100947198	1.08425	((PLE,(PUN,PTI)),(AJU,(FCA,(LYP,LLY))));	2
chrA3	0	100947264	101170993	2.23729	((PLE,(PUN,PTI)),((FCA,AJU),(LYP,LLY)));	1
chrA3	18	101171012	101213720	0.42708	((PLE,(PUN,PTI)),(FCA,(AJU,(LYP,LLY))));	3
chrA3	3	101213770	101595044	3.81274	((PUN,(PLE,PTI)),((FCA,AJU),(LYP,LLY)));	5
chrA3	0	101595292	103122007	15.2672	((PLE,(PUN,PTI)),(AJU,(FCA,(LYP,LLY))));	2
chrA3	11	103122222	103239027	1.16805	((PLE,(PUN,PTI)),(FCA,(AJU,(LYP,LLY))));	3
chrA3	2	103239568	103270663	0.31095	((PLE,(PUN,PTI)),((FCA,AJU),(LYP,LLY)));	1
chrA3	15	103270688	103305614	0.34926	((PLE,(PUN,PTI)),((FCA,AJU),(LYP,LLY)));	1
chrA3	13	103305687	103345442	0.39755	((PUN,(PLE,PTI)),((FCA,AJU),(LYP,LLY)));	5
chrA3	0	103345524	103476826	1.31302	((PLE,(PUN,PTI)),((FCA,AJU),(LYP,LLY)));	1
chrA3	18	103477170	103487537	0.10367	((PLE,(PUN,PTI)),(FCA,(AJU,(LYP,LLY))));	3
chrA3	3	103487862	103582891	0.95029	((PLE,(PUN,PTI)),(AJU,(FCA,(LYP,LLY))));	2
chrA3	18	103583019	103604183	0.21164	((PLE,(PUN,PTI)),(AJU,(FCA,(LYP,LLY))));	2
chrA3	0	103604246	105931853	23.2761	((PLE,(PUN,PTI)),(AJU,(FCA,(LYP,LLY))));	2
chrA3	11	105931992	106073161	1.41169	((PLE,(PUN,PTI)),(AJU,(FCA,(LYP,LLY))));	2
chrA3	0	106073237	107647139	15.739	((PLE,(PUN,PTI)),((FCA,AJU),(LYP,LLY)));	1
chrA3	5	107647141	108348636	7.01495	((PLE,(PUN,PTI)),((FCA,AJU),(LYP,LLY)));	1
chrA3	21	108348645	108349592	0.00947	((PTI,(PLE,PUN)),(AJU,(FCA,(LYP,LLY))));	6
chrA3	0	108349597	109500987	11.5139	((PLE,(PUN,PTI)),((FCA,AJU),(LYP,LLY)));	1
chrA3	2	109501026	109515552	0.14526	((PLE,(PUN,PTI)),((FCA,AJU),(LYP,LLY)));	1
chrA3	11	109515569	109547953	0.32384	((PLE,(PUN,PTI)),(AJU,(FCA,(LYP,LLY))));	2
chrA3	0	109548003	110452766	9.04763	((PLE,(PUN,PTI)),((FCA,AJU),(LYP,LLY)));	1
chrA3	18	110452780	110475479	0.22699	((PLE,(PUN,PTI)),(FCA,(AJU,(LYP,LLY))));	3
chrA3	0	110475493	110638093	1.626	((PLE,(PUN,PTI)),(AJU,(FCA,(LYP,LLY))));	2
chrA3	3	110638305	111459008	8.20703	((PLE,(PUN,PTI)),(AJU,(FCA,(LYP,LLY))));	2
chrA3	0	111459036	112290059	8.31023	((PLE,(PUN,PTI)),(AJU,(FCA,(LYP,LLY))));	2
chrA3	18	112290282	112303890	0.13608	((PLE,(PUN,PTI)),(FCA,(AJU,(LYP,LLY))));	3
chrA3	3	112303931	114311092	20.0716	((PLE,(PUN,PTI)),(AJU,(FCA,(LYP,LLY))));	2
chrA3	11	114311254	114455325	1.44071	((PLE,(PUN,PTI)),(FCA,(AJU,(LYP,LLY))));	3
chrA3	3	114455396	114936456	4.8106	((PUN,(PLE,PTI)),(AJU,(FCA,(LYP,LLY))));	7
chrA3	0	114936530	115122396	1.85866	((PLE,(PUN,PTI)),((FCA,AJU),(LYP,LLY)));	1
chrA3	18	115123215	115170599	0.47384	((PLE,(PUN,PTI)),(AJU,(FCA,(LYP,LLY))));	2
chrA3	0	115171558	115274053	1.02495	((PLE,(PUN,PTI)),((FCA,AJU),(LYP,LLY)));	1
chrA3	5	115274101	115966724	6.92623	((PLE,(PUN,PTI)),(AJU,(FCA,(LYP,LLY))));	2
chrA3	3	115967014	117131736	11.6472	((PLE,(PUN,PTI)),(AJU,(FCA,(LYP,LLY))));	2
chrA3	18	117131738	117140672	0.08934	((PLE,(PUN,PTI)),(FCA,(AJU,(LYP,LLY))));	3
chrA3	0	117140757	118071191	9.30434	((PLE,(PUN,PTI)),(AJU,(FCA,(LYP,LLY))));	2
chrA3	3	118071317	119258890	11.8757	((PLE,(PUN,PTI)),(AJU,(FCA,(LYP,LLY))));	2
chrA3	0	119258954	119933012	6.74058	((PLE,(PUN,PTI)),(AJU,(FCA,(LYP,LLY))));	2
chrA3	3	119934095	124487737	45.5364	((PLE,(PUN,PTI)),((FCA,AJU),(LYP,LLY)));	1
chrA3	29	124487783	124490086	0.02303	((PLE,(PUN,PTI)),((FCA,AJU),(LYP,LLY)));	1
chrA3	13	124490255	124510070	0.19815	((PLE,(PUN,PTI)),((FCA,AJU),(LYP,LLY)));	1
chrA3	5	124510292	124995105	4.84813	((PLE,(PUN,PTI)),((FCA,AJU),(LYP,LLY)));	1
chrA3	11	124995145	125170338	1.75193	((PUN,(PLE,PTI)),(AJU,(FCA,(LYP,LLY))));	7
chrA3	0	125171410	132457979	72.8657	((PLE,(PUN,PTI)),((FCA,AJU),(LYP,LLY)));	1
chrA3	18	132458033	132462169	0.04136	((PTI,(PLE,PUN)),((FCA,AJU),(LYP,LLY)));	4
chrA3	3	132462194	132583114	1.2092	((PLE,(PUN,PTI)),((FCA,AJU),(LYP,LLY)));	1
chrA3	18	132583142	132593069	0.09927	((PLE,(PUN,PTI)),(AJU,(FCA,(LYP,LLY))));	2
chrA3	0	132593087	132803816	2.10729	((PLE,(PUN,PTI)),((FCA,AJU),(LYP,LLY)));	1
chrA3	5	132803959	133677496	8.73537	((PLE,(PUN,PTI)),((FCA,AJU),(LYP,LLY)));	1
chrA3	0	133677659	133872420	1.94761	((PLE,(PUN,PTI)),(AJU,(FCA,(LYP,LLY))));	2
chrA3	5	133872450	133986720	1.1427	((PLE,(PUN,PTI)),((FCA,AJU),(LYP,LLY)));	1
chrA3	3	133986722	134235709	2.48987	((PLE,(PUN,PTI)),(AJU,(FCA,(LYP,LLY))));	2
chrA3	0	134235793	134387715	1.51922	((PLE,(PUN,PTI)),(AJU,(FCA,(LYP,LLY))));	2
chrA3	5	134387730	134750908	3.63178	((PLE,(PUN,PTI)),((FCA,AJU),(LYP,LLY)));	1
chrA3	21	134751016	134751412	0.00396	((PTI,(PLE,PUN)),((FCA,AJU),(LYP,LLY)));	4
chrA3	0	134751447	135464375	7.12928	((PLE,(PUN,PTI)),((FCA,AJU),(LYP,LLY)));	1
chrA3	21	135464391	135466286	0.01895	((PTI,(PLE,PUN)),(FCA,(AJU,(LYP,LLY))));	9
chrA3	0	135466558	135759494	2.92936	((PLE,(PUN,PTI)),((FCA,AJU),(LYP,LLY)));	1
chrA3	21	135759602	135760794	0.01192	((PUN,(PLE,PTI)),(AJU,(FCA,(LYP,LLY))));	7
chrA3	0	135760805	138546227	27.8542	((PLE,(PUN,PTI)),(AJU,(FCA,(LYP,LLY))));	2
chrA3	5	138546236	138879874	3.33638	((PLE,(PUN,PTI)),((FCA,AJU),(LYP,LLY)));	1
chrA3	15	138879888	138946808	0.6692	((PLE,(PUN,PTI)),((FCA,AJU),(LYP,LLY)));	1
chrA3	5	138946837	139216947	2.7011	((PLE,(PUN,PTI)),((FCA,AJU),(LYP,LLY)));	1
chrA3	13	139217010	139234920	0.1791	((PLE,(PUN,PTI)),(AJU,(FCA,(LYP,LLY))));	2
chrA3	15	139234926	139287811	0.52885	((PLE,(PUN,PTI)),((FCA,AJU),(LYP,LLY)));	1
chrA3	0	139288170	139722124	4.33954	((PLE,(PUN,PTI)),((FCA,AJU),(LYP,LLY)));	1
chrA3	5	139722165	139796864	0.74699	((PLE,(PUN,PTI)),(FCA,(AJU,(LYP,LLY))));	3
chrA3	3	139796945	139859467	0.62522	((PLE,(PUN,PTI)),(AJU,(FCA,(LYP,LLY))));	2
chrA3	15	139859529	139921395	0.61866	((PLE,(PUN,PTI)),(AJU,(FCA,(LYP,LLY))));	2
chrA3	5	139921501	140000554	0.79053	((PLE,(PUN,PTI)),(FCA,(AJU,(LYP,LLY))));	3
chrA3	15	140000619	140062144	0.61525	((PLE,(PUN,PTI)),(AJU,(FCA,(LYP,LLY))));	2
chrA3	0	140062187	140507562	4.45375	((PLE,(PUN,PTI)),(AJU,(FCA,(LYP,LLY))));	2
chrA3	3	140507613	140786159	2.78546	((PLE,(PUN,PTI)),(AJU,(FCA,(LYP,LLY))));	2
chrA3	11	140786161	140924923	1.38762	((PLE,(PUN,PTI)),(FCA,(AJU,(LYP,LLY))));	3
chrB1	0	7952	633638	6.25686	((PLE,(PUN,PTI)),(FCA,(AJU,(LYP,LLY))));	3
chrB1	26	633711	916498	2.82787	((PLE,(PUN,PTI)),(AJU,(FCA,(LYP,LLY))));	2
chrB1	26	917231	1090721	1.7349	((PLE,(PUN,PTI)),((FCA,AJU),(LYP,LLY)));	1
chrB1	34	1090755	1094841	0.04086	((PLE,(PUN,PTI)),(AJU,(FCA,(LYP,LLY))));	2
chrB1	29	1094865	1104517	0.09652	((PLE,(PUN,PTI)),(FCA,(AJU,(LYP,LLY))));	3
chrB1	26	1104524	1542374	4.3785	((PLE,(PUN,PTI)),(AJU,(FCA,(LYP,LLY))));	2
chrB1	35	1542408	1572454	0.30046	((PLE,(PUN,PTI)),(FCA,(AJU,(LYP,LLY))));	3
chrB1	0	1572554	1660796	0.88242	((PLE,(PUN,PTI)),((FCA,AJU),(LYP,LLY)));	1
chrB1	35	1660818	1678995	0.18177	((PUN,(PLE,PTI)),((FCA,AJU),(LYP,LLY)));	5
chrB1	26	1679116	2764919	10.858	((PLE,(PUN,PTI)),((FCA,AJU),(LYP,LLY)));	1
chrB1	34	2764977	2784537	0.1956	((PTI,(PLE,PUN)),(AJU,(FCA,(LYP,LLY))));	6
chrB1	26	2784564	2993648	2.09084	((PLE,(PUN,PTI)),(AJU,(FCA,(LYP,LLY))));	2
chrB1	34	2993670	3020314	0.26644	((PUN,(PLE,PTI)),((FCA,AJU),(LYP,LLY)));	5
chrB1	26	3021147	3084446	0.63299	((PLE,(PUN,PTI)),((FCA,AJU),(LYP,LLY)));	1
chrB1	34	3084457	3086405	0.01948	((PTI,(PLE,PUN)),((FCA,AJU),(LYP,LLY)));	4
chrB1	0	3086406	3476397	3.89991	((PLE,(PUN,PTI)),((FCA,AJU),(LYP,LLY)));	1
chrB1	26	3476507	7184533	37.0803	((PLE,(PUN,PTI)),(AJU,(FCA,(LYP,LLY))));	2
chrB1	34	7184626	7194950	0.10324	((PLE,(PUN,PTI)),((FCA,AJU),(LYP,LLY)));	1
chrB1	26	7194987	8316704	11.2172	((PLE,(PUN,PTI)),((FCA,AJU),(LYP,LLY)));	1
chrB1	29	8316782	8341958	0.25176	((PLE,(PUN,PTI)),(AJU,(FCA,(LYP,LLY))));	2
chrB1	26	8341972	12987870	46.459	((PLE,(PUN,PTI)),(AJU,(FCA,(LYP,LLY))));	2
chrB1	0	12988240	14136858	11.4862	((PLE,(PUN,PTI)),(AJU,(FCA,(LYP,LLY))));	2
chrB1	26	14136864	17421669	32.8481	((PLE,(PUN,PTI)),((FCA,AJU),(LYP,LLY)));	1
chrB1	29	17421693	17437669	0.15976	((PLE,(PUN,PTI)),(FCA,(AJU,(LYP,LLY))));	3
chrB1	0	17437688	18983083	15.454	((PLE,(PUN,PTI)),(FCA,(AJU,(LYP,LLY))));	3
chrB1	38	18983096	18985246	0.0215	((PTI,(PLE,PUN)),((FCA,AJU),(LYP,LLY)));	4
chrB1	26	18985255	20583919	15.9866	((PLE,(PUN,PTI)),((FCA,AJU),(LYP,LLY)));	1
chrB1	29	20583921	20643677	0.59756	((PTI,(PLE,PUN)),((FCA,AJU),(LYP,LLY)));	4
chrB1	0	20643695	21535409	8.91714	((PLE,(PUN,PTI)),(AJU,(FCA,(LYP,LLY))));	2
chrB1	29	21535416	21605855	0.70439	((PLE,(PUN,PTI)),(FCA,(AJU,(LYP,LLY))));	3
chrB1	26	21606533	22149203	5.4267	((PLE,(PUN,PTI)),((FCA,AJU),(LYP,LLY)));	1
chrB1	34	22149232	22181077	0.31845	((PTI,(PLE,PUN)),((FCA,AJU),(LYP,LLY)));	4
chrB1	26	22181104	24286377	21.0527	((PLE,(PUN,PTI)),((FCA,AJU),(LYP,LLY)));	1
chrB1	29	24289037	24328837	0.398	((PLE,(PUN,PTI)),(AJU,(FCA,(LYP,LLY))));	2
chrB1	26	24329520	25143331	8.13811	((PLE,(PUN,PTI)),((FCA,AJU),(LYP,LLY)));	1
chrB1	29	25143412	25179574	0.36162	((PLE,(PUN,PTI)),(AJU,(FCA,(LYP,LLY))));	2
chrB1	26	25179625	26698593	15.1897	((PLE,(PUN,PTI)),((FCA,AJU),(LYP,LLY)));	1
chrB1	0	26698627	30580334	38.8171	((PLE,(PUN,PTI)),((FCA,AJU),(LYP,LLY)));	1
chrB1	26	30580374	31851125	12.7075	((PLE,(PUN,PTI)),((FCA,AJU),(LYP,LLY)));	1
chrB1	29	31851134	31901486	0.50352	((PLE,(PUN,PTI)),(AJU,(FCA,(LYP,LLY))));	2
chrB1	0	31901501	32309932	4.08431	((PLE,(PUN,PTI)),((FCA,AJU),(LYP,LLY)));	1
chrB1	26	32309961	34919946	26.0998	((PLE,(PUN,PTI)),((FCA,AJU),(LYP,LLY)));	1
chrB1	0	34920089	35302617	3.82528	((PLE,(PUN,PTI)),((FCA,AJU),(LYP,LLY)));	1
chrB1	29	35302699	38179010	28.7631	((PLE,(PUN,PTI)),(AJU,(FCA,(LYP,LLY))));	2
chrB1	35	38179093	38243148	0.64055	((PLE,(PUN,PTI)),((FCA,AJU),(LYP,LLY)));	1
chrB1	34	38243150	38285455	0.42305	((PUN,(PLE,PTI)),((FCA,AJU),(LYP,LLY)));	5
chrB1	28	38294640	38310103	0.15463	((PLE,(PUN,PTI)),(AJU,(FCA,(LYP,LLY))));	2
chrB1	29	38310128	39783339	14.7321	((PLE,(PUN,PTI)),(FCA,(AJU,(LYP,LLY))));	3
chrB1	26	39783390	39807000	0.2361	((PLE,(PUN,PTI)),((FCA,AJU),(LYP,LLY)));	1
chrB1	29	39807039	40694877	8.87838	((PLE,(PUN,PTI)),(AJU,(FCA,(LYP,LLY))));	2
chrB1	34	40694945	40706044	0.11099	((PLE,(PUN,PTI)),((FCA,AJU),(LYP,LLY)));	1
chrB1	29	40706045	41802301	10.9626	((PLE,(PUN,PTI)),(AJU,(FCA,(LYP,LLY))));	2
chrB1	0	41802380	41855771	0.53391	((PLE,(PUN,PTI)),(FCA,(AJU,(LYP,LLY))));	3
chrB1	29	41855962	42079823	2.23861	((PLE,(PUN,PTI)),((FCA,AJU),(LYP,LLY)));	1
chrB1	0	42080053	42185273	1.0522	((PLE,(PUN,PTI)),((FCA,AJU),(LYP,LLY)));	1
chrB1	29	42185759	42376319	1.9056	((PLE,(PUN,PTI)),((FCA,AJU),(LYP,LLY)));	1
chrB1	26	42376388	42414177	0.37789	((PLE,(PUN,PTI)),((FCA,AJU),(LYP,LLY)));	1
chrB1	29	42414252	42500547	0.86295	((PTI,(PLE,PUN)),(FCA,(AJU,(LYP,LLY))));	9
chrB1	15	42500614	42521294	0.2068	((PTI,(PLE,PUN)),((FCA,AJU),(LYP,LLY)));	4
chrB1	29	42521328	42648951	1.27623	((PTI,(PLE,PUN)),((FCA,AJU),(LYP,LLY)));	4
chrB1	0	42650292	44483413	18.3312	((PLE,(PUN,PTI)),(AJU,(FCA,(LYP,LLY))));	2
chrB1	29	44483958	44695936	2.11978	((PLE,(PUN,PTI)),((FCA,AJU),(LYP,LLY)));	1
chrB1	0	44695990	45238500	5.4251	((PLE,(PUN,PTI)),((FCA,AJU),(LYP,LLY)));	1
chrB1	38	45238589	45243074	0.04485	((PTI,(PLE,PUN)),((FCA,AJU),(LYP,LLY)));	4
chrB1	0	45243135	47398649	21.5551	((PLE,(PUN,PTI)),(AJU,(FCA,(LYP,LLY))));	2
chrB1	15	47398701	47438991	0.4029	((PTI,(PLE,PUN)),(FCA,(AJU,(LYP,LLY))));	9
chrB1	26	47439079	48623549	11.8447	((PLE,(PUN,PTI)),((FCA,AJU),(LYP,LLY)));	1
chrB1	15	48623585	48638250	0.14665	((PTI,(PLE,PUN)),((FCA,AJU),(LYP,LLY)));	4
chrB1	34	48638255	48672293	0.34038	((PTI,(PLE,PUN)),((FCA,AJU),(LYP,LLY)));	4
chrB1	0	48672316	49948499	12.7618	((PLE,(PUN,PTI)),(AJU,(FCA,(LYP,LLY))));	2
chrB1	29	49948831	50072176	1.23345	((PLE,(PUN,PTI)),(AJU,(FCA,(LYP,LLY))));	2
chrB1	0	50072285	50407456	3.35171	((PLE,(PUN,PTI)),((FCA,AJU),(LYP,LLY)));	1
chrB1	29	50407490	50589753	1.82263	((PLE,(PUN,PTI)),(AJU,(FCA,(LYP,LLY))));	2
chrB1	0	50589982	51806461	12.1648	((PLE,(PUN,PTI)),(AJU,(FCA,(LYP,LLY))));	2
chrB1	29	51806677	52058980	2.52303	((PUN,(PLE,PTI)),(FCA,(AJU,(LYP,LLY))));	8
chrB1	0	52059025	52444520	3.85495	((PLE,(PUN,PTI)),((FCA,AJU),(LYP,LLY)));	1
chrB1	29	52444902	52500397	0.55495	((PUN,(PLE,PTI)),((FCA,AJU),(LYP,LLY)));	5
chrB1	26	52500407	56989775	44.8937	((PLE,(PUN,PTI)),(AJU,(FCA,(LYP,LLY))));	2
chrB1	34	56989818	56995717	0.05899	((PLE,(PUN,PTI)),((FCA,AJU),(LYP,LLY)));	1
chrB1	29	56995735	57064947	0.69212	((PLE,(PUN,PTI)),(AJU,(FCA,(LYP,LLY))));	2
chrB1	26	57065025	57197301	1.32276	((PLE,(PUN,PTI)),(FCA,(AJU,(LYP,LLY))));	3
chrB1	29	57197302	57261625	0.64323	((PLE,(PUN,PTI)),((FCA,AJU),(LYP,LLY)));	1
chrB1	26	57261645	57294309	0.32664	((PLE,(PUN,PTI)),((FCA,AJU),(LYP,LLY)));	1
chrB1	15	57294731	57316992	0.22261	((PTI,(PLE,PUN)),(AJU,(FCA,(LYP,LLY))));	6
chrB1	29	57317016	57434087	1.17071	((PUN,(PLE,PTI)),(AJU,(FCA,(LYP,LLY))));	7
chrB1	26	57434177	58579185	11.4501	((PLE,(PUN,PTI)),(FCA,(AJU,(LYP,LLY))));	3
chrB1	0	58579322	59445965	8.66643	((PLE,(PUN,PTI)),(FCA,(AJU,(LYP,LLY))));	3
chrB1	29	59446035	59517393	0.71358	((PLE,(PUN,PTI)),(FCA,(AJU,(LYP,LLY))));	3
chrB1	26	59517464	59597244	0.7978	((PLE,(PUN,PTI)),((FCA,AJU),(LYP,LLY)));	1
chrB1	29	59597323	59729567	1.32244	((PLE,(PUN,PTI)),(AJU,(FCA,(LYP,LLY))));	2
chrB1	26	59729679	65090734	53.6106	((PLE,(PUN,PTI)),(AJU,(FCA,(LYP,LLY))));	2
chrB1	29	65090813	65169815	0.79002	((PLE,(PUN,PTI)),(AJU,(FCA,(LYP,LLY))));	2
chrB1	0	65169852	67638302	24.6845	((PLE,(PUN,PTI)),((FCA,AJU),(LYP,LLY)));	1
chrB1	34	67638628	67647018	0.0839	((PTI,(PLE,PUN)),((FCA,AJU),(LYP,LLY)));	4
chrB1	15	67647084	67652934	0.0585	((PTI,(PLE,PUN)),(AJU,(FCA,(LYP,LLY))));	6
chrB1	29	67653047	67680689	0.27642	((PLE,(PUN,PTI)),((FCA,AJU),(LYP,LLY)));	1
chrB1	26	67683804	68419818	7.36014	((PLE,(PUN,PTI)),((FCA,AJU),(LYP,LLY)));	1
chrB1	29	68419830	68469055	0.49225	((PLE,(PUN,PTI)),(FCA,(AJU,(LYP,LLY))));	3
chrB1	0	68469084	69581798	11.1271	((PLE,(PUN,PTI)),(FCA,(AJU,(LYP,LLY))));	3
chrB1	34	69581834	69601044	0.1921	((PUN,(PLE,PTI)),((FCA,AJU),(LYP,LLY)));	5
chrB1	26	69601392	73236133	36.3474	((PLE,(PUN,PTI)),((FCA,AJU),(LYP,LLY)));	1
chrB1	29	73236147	73279412	0.43265	((PLE,(PUN,PTI)),(AJU,(FCA,(LYP,LLY))));	2
chrB1	26	73281854	75523725	22.4187	((PLE,(PUN,PTI)),(AJU,(FCA,(LYP,LLY))));	2
chrB1	29	75523908	75613614	0.89706	((PLE,(PUN,PTI)),(FCA,(AJU,(LYP,LLY))));	3
chrB1	26	75613948	76550003	9.36055	((PLE,(PUN,PTI)),((FCA,AJU),(LYP,LLY)));	1
chrB1	0	76550109	76885559	3.3545	((PTI,(PLE,PUN)),((FCA,AJU),(LYP,LLY)));	4
chrB1	29	76885737	77036022	1.50285	((PLE,(PUN,PTI)),(AJU,(FCA,(LYP,LLY))));	2
chrB1	0	77036131	79230080	21.9395	((PLE,(PUN,PTI)),((FCA,AJU),(LYP,LLY)));	1
chrB1	29	79230101	79334312	1.04211	((PLE,(PUN,PTI)),((FCA,AJU),(LYP,LLY)));	1
chrB1	0	79334336	79445865	1.11529	((PLE,(PUN,PTI)),((FCA,AJU),(LYP,LLY)));	1
chrB1	29	79445874	79487644	0.4177	((PUN,(PLE,PTI)),(AJU,(FCA,(LYP,LLY))));	7
chrB1	0	79487661	79994829	5.07168	((PLE,(PUN,PTI)),(AJU,(FCA,(LYP,LLY))));	2
chrB1	26	79994834	81408797	14.1396	((PLE,(PUN,PTI)),((FCA,AJU),(LYP,LLY)));	1
chrB1	0	81408815	82310834	9.02019	((PLE,(PUN,PTI)),(AJU,(FCA,(LYP,LLY))));	2
chrB1	29	82310844	82602927	2.92083	((PTI,(PLE,PUN)),((FCA,AJU),(LYP,LLY)));	4
chrB1	0	82602934	85704610	31.0168	((PLE,(PUN,PTI)),(AJU,(FCA,(LYP,LLY))));	2
chrB1	26	85704634	87066922	13.6229	((PLE,(PUN,PTI)),((FCA,AJU),(LYP,LLY)));	1
chrB1	29	87066990	87236768	1.69778	((PLE,(PUN,PTI)),(AJU,(FCA,(LYP,LLY))));	2
chrB1	26	87236947	89430635	21.9369	((PLE,(PUN,PTI)),((FCA,AJU),(LYP,LLY)));	1
chrB1	0	89430771	90058570	6.27799	((PLE,(PUN,PTI)),(FCA,(AJU,(LYP,LLY))));	3
chrB1	26	90058913	92533597	24.7468	((PLE,(PUN,PTI)),((FCA,AJU),(LYP,LLY)));	1
chrB1	0	92533630	92766747	2.33117	((PLE,(PUN,PTI)),((FCA,AJU),(LYP,LLY)));	1
chrB1	29	92766825	92786979	0.20154	((PLE,(PUN,PTI)),(AJU,(FCA,(LYP,LLY))));	2
chrB1	26	92786986	94017317	12.3033	((PLE,(PUN,PTI)),((FCA,AJU),(LYP,LLY)));	1
chrB1	0	94017352	96168204	21.5085	((PLE,(PUN,PTI)),(AJU,(FCA,(LYP,LLY))));	2
chrB1	29	96168632	96646967	4.78335	((PLE,(PUN,PTI)),(AJU,(FCA,(LYP,LLY))));	2
chrB1	0	96646994	96948242	3.01248	((PUN,(PLE,PTI)),((FCA,AJU),(LYP,LLY)));	5
chrB1	29	96948271	97163334	2.15063	((PLE,(PUN,PTI)),(FCA,(AJU,(LYP,LLY))));	3
chrB1	26	97163371	97264864	1.01493	((PLE,(PUN,PTI)),((FCA,AJU),(LYP,LLY)));	1
chrB1	34	97264920	97300239	0.35319	((PLE,(PUN,PTI)),((FCA,AJU),(LYP,LLY)));	1
chrB1	29	97300438	97411745	1.11307	((PLE,(PUN,PTI)),((FCA,AJU),(LYP,LLY)));	1
chrB1	26	97411754	97564167	1.52413	((PLE,(PUN,PTI)),((FCA,AJU),(LYP,LLY)));	1
chrB1	29	97564180	97765793	2.01613	((PLE,(PUN,PTI)),(FCA,(AJU,(LYP,LLY))));	3
chrB1	0	97766121	98796560	10.3044	((PLE,(PUN,PTI)),(AJU,(FCA,(LYP,LLY))));	2
chrB1	29	98803950	98919841	1.15891	((PLE,(PUN,PTI)),(AJU,(FCA,(LYP,LLY))));	2
chrB1	0	98919903	99711885	7.91982	((PLE,(PUN,PTI)),(AJU,(FCA,(LYP,LLY))));	2
chrB1	29	99711957	99752388	0.40431	((PTI,(PLE,PUN)),(AJU,(FCA,(LYP,LLY))));	6
chrB1	26	99752973	100700247	9.47274	((PLE,(PUN,PTI)),((FCA,AJU),(LYP,LLY)));	1
chrB1	0	100700318	102179554	14.7924	((PLE,(PUN,PTI)),(FCA,(AJU,(LYP,LLY))));	3
chrB1	15	102179556	102199962	0.20406	((PTI,(PLE,PUN)),((FCA,AJU),(LYP,LLY)));	4
chrB1	29	102199984	102350102	1.50118	((PUN,(PLE,PTI)),((FCA,AJU),(LYP,LLY)));	5
chrB1	0	102350352	102534233	1.83881	((PLE,(PUN,PTI)),((FCA,AJU),(LYP,LLY)));	1
chrB1	29	102534310	102654925	1.20615	((PTI,(PLE,PUN)),((FCA,AJU),(LYP,LLY)));	4
chrB1	0	102655065	103542792	8.87727	((PLE,(PUN,PTI)),(AJU,(FCA,(LYP,LLY))));	2
chrB1	29	103542848	103633627	0.90779	((PLE,(PUN,PTI)),(AJU,(FCA,(LYP,LLY))));	2
chrB1	0	103633747	105572871	19.3912	((PLE,(PUN,PTI)),(AJU,(FCA,(LYP,LLY))));	2
chrB1	29	105572955	105618097	0.45142	((PLE,(PUN,PTI)),(FCA,(AJU,(LYP,LLY))));	3
chrB1	26	105618285	105675875	0.5759	((PLE,(PUN,PTI)),((FCA,AJU),(LYP,LLY)));	1
chrB1	29	105675978	105779070	1.03092	((PLE,(PUN,PTI)),(AJU,(FCA,(LYP,LLY))));	2
chrB1	0	105779274	106436002	6.56728	((PLE,(PUN,PTI)),(FCA,(AJU,(LYP,LLY))));	3
chrB1	26	106436032	107263107	8.27075	((PLE,(PUN,PTI)),(AJU,(FCA,(LYP,LLY))));	2
chrB1	29	107263420	107292715	0.29295	((PUN,(PLE,PTI)),(FCA,(AJU,(LYP,LLY))));	8
chrB1	26	107292855	108606169	13.1331	((PLE,(PUN,PTI)),((FCA,AJU),(LYP,LLY)));	1
chrB1	29	108606212	109252016	6.45804	((PLE,(PUN,PTI)),(FCA,(AJU,(LYP,LLY))));	3
chrB1	0	109252108	110374198	11.2209	((PLE,(PUN,PTI)),((FCA,AJU),(LYP,LLY)));	1
chrB1	29	110374331	110424619	0.50288	((PLE,(PUN,PTI)),(AJU,(FCA,(LYP,LLY))));	2
chrB1	26	110424642	111007864	5.83222	((PLE,(PUN,PTI)),((FCA,AJU),(LYP,LLY)));	1
chrB1	0	111007928	111390215	3.82287	((PLE,(PUN,PTI)),((FCA,AJU),(LYP,LLY)));	1
chrB1	15	111390548	111443910	0.53362	((PTI,(PLE,PUN)),((FCA,AJU),(LYP,LLY)));	4
chrB1	0	111443980	111695546	2.51566	((PLE,(PUN,PTI)),((FCA,AJU),(LYP,LLY)));	1
chrB1	34	111695648	111748730	0.53082	((PLE,(PUN,PTI)),(AJU,(FCA,(LYP,LLY))));	2
chrB1	0	111748785	111927818	1.79033	((PLE,(PUN,PTI)),(FCA,(AJU,(LYP,LLY))));	3
chrB1	26	111927857	112552300	6.24443	((PLE,(PUN,PTI)),((FCA,AJU),(LYP,LLY)));	1
chrB1	0	112552442	114038890	14.8645	((PLE,(PUN,PTI)),((FCA,AJU),(LYP,LLY)));	1
chrB1	26	114038900	114417203	3.78303	((PLE,(PUN,PTI)),((FCA,AJU),(LYP,LLY)));	1
chrB1	0	114417219	115735195	13.1798	((PLE,(PUN,PTI)),(AJU,(FCA,(LYP,LLY))));	2
chrB1	35	115735254	115773832	0.38578	((PLE,(PUN,PTI)),((FCA,AJU),(LYP,LLY)));	1
chrB1	26	115773837	116810648	10.3681	((PLE,(PUN,PTI)),((FCA,AJU),(LYP,LLY)));	1
chrB1	29	116810673	117022111	2.11438	((PLE,(PUN,PTI)),(FCA,(AJU,(LYP,LLY))));	3
chrB1	26	117022176	117520354	4.98178	((PLE,(PUN,PTI)),(AJU,(FCA,(LYP,LLY))));	2
chrB1	29	117520411	117634237	1.13826	((PLE,(PUN,PTI)),(FCA,(AJU,(LYP,LLY))));	3
chrB1	26	117634350	117814236	1.79886	((PLE,(PUN,PTI)),(AJU,(FCA,(LYP,LLY))));	2
chrB1	29	117814422	117877680	0.63258	((PLE,(PUN,PTI)),(FCA,(AJU,(LYP,LLY))));	3
chrB1	0	117877713	118405128	5.27415	((PLE,(PUN,PTI)),((FCA,AJU),(LYP,LLY)));	1
chrB1	26	118405210	119831303	14.2609	((PLE,(PUN,PTI)),((FCA,AJU),(LYP,LLY)));	1
chrB1	29	119831307	120075215	2.43908	((PUN,(PLE,PTI)),(AJU,(FCA,(LYP,LLY))));	7
chrB1	26	120075219	121289247	12.1403	((PLE,(PUN,PTI)),(AJU,(FCA,(LYP,LLY))));	2
chrB1	29	121289251	121335813	0.46562	((PUN,(PLE,PTI)),(FCA,(AJU,(LYP,LLY))));	8
chrB1	26	121335814	123150600	18.1479	((PLE,(PUN,PTI)),((FCA,AJU),(LYP,LLY)));	1
chrB1	29	123150850	123397472	2.46622	((PLE,(PUN,PTI)),(AJU,(FCA,(LYP,LLY))));	2
chrB1	26	123397718	123596026	1.98308	((PLE,(PUN,PTI)),((FCA,AJU),(LYP,LLY)));	1
chrB1	0	123596242	126820096	32.2385	((PLE,(PUN,PTI)),(AJU,(FCA,(LYP,LLY))));	2
chrB1	15	126820123	126844596	0.24473	((PTI,(PLE,PUN)),((FCA,AJU),(LYP,LLY)));	4
chrB1	0	126844963	132866611	60.2165	((PLE,(PUN,PTI)),((FCA,AJU),(LYP,LLY)));	1
chrB1	29	132866861	133078768	2.11907	((PTI,(PLE,PUN)),(AJU,(FCA,(LYP,LLY))));	6
chrB1	0	133079020	133501012	4.21992	((PLE,(PUN,PTI)),((FCA,AJU),(LYP,LLY)));	1
chrB1	29	133501022	133629856	1.28834	((PLE,(PUN,PTI)),(AJU,(FCA,(LYP,LLY))));	2
chrB1	0	133629857	133779381	1.49524	((PTI,(PLE,PUN)),(FCA,(AJU,(LYP,LLY))));	9
chrB1	29	133779394	133899196	1.19802	((PUN,(PLE,PTI)),(FCA,(AJU,(LYP,LLY))));	8
chrB1	0	133899267	134109173	2.09906	((PLE,(PUN,PTI)),((FCA,AJU),(LYP,LLY)));	1
chrB1	29	134109174	134321377	2.12203	((PLE,(PUN,PTI)),(AJU,(FCA,(LYP,LLY))));	2
chrB1	0	134321387	135915222	15.9383	((PLE,(PUN,PTI)),((FCA,AJU),(LYP,LLY)));	1
chrB1	26	135915284	135979948	0.64664	((PLE,(PUN,PTI)),(AJU,(FCA,(LYP,LLY))));	2
chrB1	35	135980669	136029057	0.48388	((PLE,(PUN,PTI)),(FCA,(AJU,(LYP,LLY))));	3
chrB1	26	136029087	136347757	3.1867	((PLE,(PUN,PTI)),((FCA,AJU),(LYP,LLY)));	1
chrB1	29	136347833	136504268	1.56435	((PLE,(PUN,PTI)),(AJU,(FCA,(LYP,LLY))));	2
chrB1	0	136505095	137163019	6.57924	((PLE,(PUN,PTI)),((FCA,AJU),(LYP,LLY)));	1
chrB1	26	137163028	137651561	4.88533	((PLE,(PUN,PTI)),((FCA,AJU),(LYP,LLY)));	1
chrB1	0	137651967	139326815	16.7485	((PLE,(PUN,PTI)),(AJU,(FCA,(LYP,LLY))));	2
chrB1	26	139327069	140559787	12.3272	((PLE,(PUN,PTI)),(AJU,(FCA,(LYP,LLY))));	2
chrB1	0	140559910	142782074	22.2216	((PLE,(PUN,PTI)),(AJU,(FCA,(LYP,LLY))));	2
chrB1	29	142783372	142935153	1.51781	((PLE,(PUN,PTI)),(FCA,(AJU,(LYP,LLY))));	3
chrB1	0	142935271	143867763	9.32492	((PLE,(PUN,PTI)),(AJU,(FCA,(LYP,LLY))));	2
chrB1	26	143867807	144236581	3.68774	((PLE,(PUN,PTI)),(FCA,(AJU,(LYP,LLY))));	3
chrB1	0	144236635	144874798	6.38163	((PLE,(PUN,PTI)),(FCA,(AJU,(LYP,LLY))));	3
chrB1	29	144874807	144913360	0.38553	((PUN,(PLE,PTI)),(FCA,(AJU,(LYP,LLY))));	8
chrB1	26	144913372	146202855	12.8948	((PLE,(PUN,PTI)),((FCA,AJU),(LYP,LLY)));	1
chrB1	0	146202904	146520841	3.17937	((PLE,(PUN,PTI)),(AJU,(FCA,(LYP,LLY))));	2
chrB1	26	146520851	146671618	1.50767	((PLE,(PUN,PTI)),((FCA,AJU),(LYP,LLY)));	1
chrB1	15	146671628	146677949	0.06321	((PTI,(PLE,PUN)),((FCA,AJU),(LYP,LLY)));	4
chrB1	26	146678025	146859276	1.81251	((PLE,(PUN,PTI)),((FCA,AJU),(LYP,LLY)));	1
chrB1	29	146860004	147035705	1.75701	((PUN,(PLE,PTI)),(AJU,(FCA,(LYP,LLY))));	7
chrB1	26	147035719	148284765	12.4905	((PLE,(PUN,PTI)),(FCA,(AJU,(LYP,LLY))));	3
chrB1	0	148284775	149293300	10.0853	((PLE,(PUN,PTI)),((FCA,AJU),(LYP,LLY)));	1
chrB1	29	149293326	149312350	0.19024	((PUN,(PLE,PTI)),(FCA,(AJU,(LYP,LLY))));	8
chrB1	26	149312367	149694416	3.82049	((PLE,(PUN,PTI)),(FCA,(AJU,(LYP,LLY))));	3
chrB1	29	149694424	149752852	0.58428	((PLE,(PUN,PTI)),((FCA,AJU),(LYP,LLY)));	1
chrB1	34	149752917	149756023	0.03106	((PLE,(PUN,PTI)),((FCA,AJU),(LYP,LLY)));	1
chrB1	0	149756042	152686402	29.3036	((PLE,(PUN,PTI)),(AJU,(FCA,(LYP,LLY))));	2
chrB1	29	152686731	152830830	1.44099	((PLE,(PUN,PTI)),(AJU,(FCA,(LYP,LLY))));	2
chrB1	0	152830834	153477322	6.46488	((PLE,(PUN,PTI)),((FCA,AJU),(LYP,LLY)));	1
chrB1	26	153477351	153835637	3.58286	((PLE,(PUN,PTI)),((FCA,AJU),(LYP,LLY)));	1
chrB1	38	153835713	153840963	0.0525	((PTI,(PLE,PUN)),(FCA,(AJU,(LYP,LLY))));	9
chrB1	0	153841000	154258856	4.17856	((PLE,(PUN,PTI)),(FCA,(AJU,(LYP,LLY))));	3
chrB1	34	154258861	154271332	0.12471	((PLE,(PUN,PTI)),((FCA,AJU),(LYP,LLY)));	1
chrB1	26	154271397	155353632	10.8224	((PLE,(PUN,PTI)),((FCA,AJU),(LYP,LLY)));	1
chrB1	0	155353679	158753363	33.9968	((PLE,(PUN,PTI)),(AJU,(FCA,(LYP,LLY))));	2
chrB1	34	158753386	158761741	0.08355	((PTI,(PLE,PUN)),((FCA,AJU),(LYP,LLY)));	4
chrB1	29	158761764	158822120	0.60356	((PLE,(PUN,PTI)),(AJU,(FCA,(LYP,LLY))));	2
chrB1	26	158822404	159068393	2.45989	((PLE,(PUN,PTI)),((FCA,AJU),(LYP,LLY)));	1
chrB1	0	159068459	159355999	2.8754	((PLE,(PUN,PTI)),(AJU,(FCA,(LYP,LLY))));	2
chrB1	29	159356028	159436308	0.8028	((PLE,(PUN,PTI)),(AJU,(FCA,(LYP,LLY))));	2
chrB1	0	159436433	159955820	5.19387	((PLE,(PUN,PTI)),(AJU,(FCA,(LYP,LLY))));	2
chrB1	29	159955873	160087563	1.3169	((PLE,(PUN,PTI)),(AJU,(FCA,(LYP,LLY))));	2
chrB1	0	160087570	161059349	9.71779	((PLE,(PUN,PTI)),(FCA,(AJU,(LYP,LLY))));	3
chrB1	29	161059353	161241586	1.82233	((PUN,(PLE,PTI)),(FCA,(AJU,(LYP,LLY))));	8
chrB1	26	161241649	161733190	4.91541	((PLE,(PUN,PTI)),((FCA,AJU),(LYP,LLY)));	1
chrB1	29	161733250	161876341	1.43091	((PLE,(PUN,PTI)),(AJU,(FCA,(LYP,LLY))));	2
chrB1	26	161876392	163581853	17.0546	((PLE,(PUN,PTI)),((FCA,AJU),(LYP,LLY)));	1
chrB1	29	163581885	163638901	0.57016	((PLE,(PUN,PTI)),(AJU,(FCA,(LYP,LLY))));	2
chrB1	26	163638945	168667606	50.2866	((PLE,(PUN,PTI)),((FCA,AJU),(LYP,LLY)));	1
chrB1	29	168667684	168730273	0.62589	((PLE,(PUN,PTI)),(FCA,(AJU,(LYP,LLY))));	3
chrB1	26	168730316	170317477	15.8716	((PLE,(PUN,PTI)),(AJU,(FCA,(LYP,LLY))));	2
chrB1	0	170317558	171162755	8.45197	((PLE,(PUN,PTI)),(AJU,(FCA,(LYP,LLY))));	2
chrB1	26	171162763	172614406	14.5164	((PLE,(PUN,PTI)),((FCA,AJU),(LYP,LLY)));	1
chrB1	0	172614468	173180811	5.66343	((PUN,(PLE,PTI)),((FCA,AJU),(LYP,LLY)));	5
chrB1	29	173181098	173270666	0.89568	((PLE,(PUN,PTI)),(AJU,(FCA,(LYP,LLY))));	2
chrB1	0	173270677	174482546	12.1187	((PLE,(PUN,PTI)),((FCA,AJU),(LYP,LLY)));	1
chrB1	29	174482558	174582324	0.99766	((PLE,(PUN,PTI)),(FCA,(AJU,(LYP,LLY))));	3
chrB1	26	174582349	176247681	16.6533	((PLE,(PUN,PTI)),((FCA,AJU),(LYP,LLY)));	1
chrB1	29	176247719	176296664	0.48945	((PUN,(PLE,PTI)),(FCA,(AJU,(LYP,LLY))));	8
chrB1	0	176296786	176915377	6.18591	((PLE,(PUN,PTI)),(FCA,(AJU,(LYP,LLY))));	3
chrB1	26	176915410	180015333	30.9992	((PLE,(PUN,PTI)),((FCA,AJU),(LYP,LLY)));	1
chrB1	0	180015358	181151701	11.3634	((PLE,(PUN,PTI)),(FCA,(AJU,(LYP,LLY))));	3
chrB1	26	181151788	184526104	33.7432	((PLE,(PUN,PTI)),((FCA,AJU),(LYP,LLY)));	1
chrB1	29	184526105	184636226	1.10121	((PLE,(PUN,PTI)),(AJU,(FCA,(LYP,LLY))));	2
chrB1	26	184636229	185013750	3.77521	((PLE,(PUN,PTI)),((FCA,AJU),(LYP,LLY)));	1
chrB1	0	185013786	185625861	6.12075	((PLE,(PUN,PTI)),((FCA,AJU),(LYP,LLY)));	1
chrB1	26	185625872	186586434	9.60562	((PLE,(PUN,PTI)),(AJU,(FCA,(LYP,LLY))));	2
chrB1	29	186586447	186659644	0.73197	((PLE,(PUN,PTI)),((FCA,AJU),(LYP,LLY)));	1
chrB1	0	186659897	187329629	6.69732	((PLE,(PUN,PTI)),(AJU,(FCA,(LYP,LLY))));	2
chrB1	26	187329717	190172109	28.4239	((PLE,(PUN,PTI)),((FCA,AJU),(LYP,LLY)));	1
chrB1	0	190172241	192488973	23.1673	((PLE,(PUN,PTI)),(AJU,(FCA,(LYP,LLY))));	2
chrB1	15	192489062	192509510	0.20448	((PTI,(PLE,PUN)),((FCA,AJU),(LYP,LLY)));	4
chrB1	29	192509566	192577695	0.68129	((PLE,(PUN,PTI)),(AJU,(FCA,(LYP,LLY))));	2
chrB1	26	192577921	194736672	21.5875	((PLE,(PUN,PTI)),(AJU,(FCA,(LYP,LLY))));	2
chrB1	35	194736677	194759096	0.22419	((PLE,(PUN,PTI)),(FCA,(AJU,(LYP,LLY))));	3
chrB1	26	194759261	196574412	18.1515	((PLE,(PUN,PTI)),((FCA,AJU),(LYP,LLY)));	1
chrB1	0	196574467	196735892	1.61425	((PLE,(PUN,PTI)),((FCA,AJU),(LYP,LLY)));	1
chrB1	35	196735992	196805780	0.69788	((PLE,(PUN,PTI)),((FCA,AJU),(LYP,LLY)));	1
chrB1	34	196805859	196826378	0.20519	((PLE,(PUN,PTI)),(AJU,(FCA,(LYP,LLY))));	2
chrB1	26	196826414	197196380	3.69966	((PLE,(PUN,PTI)),(AJU,(FCA,(LYP,LLY))));	2
chrB1	34	197196428	197202659	0.06231	((PLE,(PUN,PTI)),(AJU,(FCA,(LYP,LLY))));	2
chrB1	26	197202701	199451516	22.4882	((PLE,(PUN,PTI)),((FCA,AJU),(LYP,LLY)));	1
chrB1	35	199452023	199473736	0.21713	((PLE,(PUN,PTI)),(AJU,(FCA,(LYP,LLY))));	2
chrB1	26	199473942	199971498	4.97556	((PLE,(PUN,PTI)),((FCA,AJU),(LYP,LLY)));	1
chrB1	35	199971500	200049606	0.78106	((PLE,(PUN,PTI)),(AJU,(FCA,(LYP,LLY))));	2
chrB1	26	200049636	200066040	0.16404	((PLE,(PUN,PTI)),((FCA,AJU),(LYP,LLY)));	1
chrB1	29	200066109	200109314	0.43205	((PLE,(PUN,PTI)),(FCA,(AJU,(LYP,LLY))));	3
chrB1	26	200109343	201990539	18.812	((PLE,(PUN,PTI)),((FCA,AJU),(LYP,LLY)));	1
chrB1	0	201990692	202102925	1.12233	((PLE,(PUN,PTI)),((FCA,AJU),(LYP,LLY)));	1
chrB1	35	202102943	202629157	5.26214	((PLE,(PUN,PTI)),(AJU,(FCA,(LYP,LLY))));	2
chrB1	26	202629249	202738655	1.09406	((PLE,(PUN,PTI)),(FCA,(AJU,(LYP,LLY))));	3
chrB1	35	202738659	202888208	1.49549	((PLE,(PUN,PTI)),(FCA,(AJU,(LYP,LLY))));	3
chrB1	0	202888314	203006814	1.185	((PUN,(PLE,PTI)),((FCA,AJU),(LYP,LLY)));	5
chrB1	35	203006855	203336633	3.29778	((PLE,(PUN,PTI)),(FCA,(AJU,(LYP,LLY))));	3
chrB1	26	203336640	203368954	0.32314	((PUN,(PLE,PTI)),((FCA,AJU),(LYP,LLY)));	5
chrB1	35	203368990	204202886	8.33896	((PLE,(PUN,PTI)),(AJU,(FCA,(LYP,LLY))));	2
chrB1	0	204202937	205281094	10.7816	((PLE,(PUN,PTI)),((FCA,AJU),(LYP,LLY)));	1
chrB1	35	205281216	206249159	9.67943	((PLE,(PUN,PTI)),(AJU,(FCA,(LYP,LLY))));	2
chrB1	29	206249205	206535682	2.86477	((PLE,(PUN,PTI)),(FCA,(AJU,(LYP,LLY))));	3
chrB2	32	469	225752	2.25283	((PUN,(PLE,PTI)),(AJU,(FCA,(LYP,LLY))));	7
chrB2	18	232808	263066	0.30258	((PLE,(PUN,PTI)),(FCA,(AJU,(LYP,LLY))));	3
chrB2	0	263107	457978	1.94871	((PLE,(PUN,PTI)),((FCA,AJU),(LYP,LLY)));	1
chrB2	17	457983	1182191	7.24208	((PLE,(PUN,PTI)),(FCA,(AJU,(LYP,LLY))));	3
chrB2	0	1182276	1565012	3.82736	((PLE,(PUN,PTI)),(AJU,(FCA,(LYP,LLY))));	2
chrB2	12	1569712	1637079	0.67367	((PLE,(PUN,PTI)),(AJU,(FCA,(LYP,LLY))));	2
chrB2	14	1637132	2391607	7.54475	((PLE,(PUN,PTI)),((FCA,AJU),(LYP,LLY)));	1
chrB2	18	2391642	2392232	0.0059	((PTI,(PLE,PUN)),(FCA,(AJU,(LYP,LLY))));	9
chrB2	14	2392242	2585812	1.9357	((PLE,(PUN,PTI)),(AJU,(FCA,(LYP,LLY))));	2
chrB2	32	2585815	2862411	2.76596	((PLE,(PUN,PTI)),(FCA,(AJU,(LYP,LLY))));	3
chrB2	18	2862425	2864548	0.02123	((PUN,(PLE,PTI)),(AJU,(FCA,(LYP,LLY))));	7
chrB2	14	2864587	3519681	6.55094	((PLE,(PUN,PTI)),(AJU,(FCA,(LYP,LLY))));	2
chrB2	18	3520146	3520684	0.00538	((PLE,(PUN,PTI)),(AJU,(FCA,(LYP,LLY))));	2
chrB2	14	3520751	5317442	17.9669	((PLE,(PUN,PTI)),(AJU,(FCA,(LYP,LLY))));	2
chrB2	12	5317457	5345184	0.27727	((PLE,(PUN,PTI)),(AJU,(FCA,(LYP,LLY))));	2
chrB2	14	5345194	5607113	2.61919	((PLE,(PUN,PTI)),((FCA,AJU),(LYP,LLY)));	1
chrB2	33	5607132	5608666	0.01534	((PLE,(PUN,PTI)),((FCA,AJU),(LYP,LLY)));	1
chrB2	14	5608705	7380619	17.7191	((PLE,(PUN,PTI)),(AJU,(FCA,(LYP,LLY))));	2
chrB2	18	7380635	7381414	0.00779	((PUN,(PLE,PTI)),(FCA,(AJU,(LYP,LLY))));	8
chrB2	0	7381494	7399464	0.1797	((PLE,(PUN,PTI)),(AJU,(FCA,(LYP,LLY))));	2
chrB2	17	7399548	7504426	1.04878	((PLE,(PUN,PTI)),((FCA,AJU),(LYP,LLY)));	1
chrB2	0	7504484	8157158	6.52674	((PLE,(PUN,PTI)),(AJU,(FCA,(LYP,LLY))));	2
chrB2	18	8157498	8158077	0.00579	((PUN,(PLE,PTI)),(FCA,(AJU,(LYP,LLY))));	8
chrB2	14	8158151	8491341	3.3319	((PLE,(PUN,PTI)),(AJU,(FCA,(LYP,LLY))));	2
chrB2	0	8491793	9105593	6.138	((PLE,(PUN,PTI)),((FCA,AJU),(LYP,LLY)));	1
chrB2	14	9105764	9493453	3.87689	((PLE,(PUN,PTI)),((FCA,AJU),(LYP,LLY)));	1
chrB2	17	9493545	9983099	4.89554	((PLE,(PUN,PTI)),((FCA,AJU),(LYP,LLY)));	1
chrB2	14	9983147	11360861	13.7771	((PLE,(PUN,PTI)),(AJU,(FCA,(LYP,LLY))));	2
chrB2	12	11360868	11418927	0.58059	((PUN,(PLE,PTI)),(AJU,(FCA,(LYP,LLY))));	7
chrB2	17	11419029	11536561	1.17532	((PLE,(PUN,PTI)),(AJU,(FCA,(LYP,LLY))));	2
chrB2	12	11537305	11646945	1.0964	((PLE,(PUN,PTI)),(FCA,(AJU,(LYP,LLY))));	3
chrB2	12	11704286	12292180	5.87894	((PUN,(PLE,PTI)),(FCA,(AJU,(LYP,LLY))));	8
chrB2	17	12292243	12528664	2.36421	((PTI,(PLE,PUN)),((FCA,AJU),(LYP,LLY)));	4
chrB2	32	12530139	12737462	2.07323	((PTI,(PLE,PUN)),(FCA,(AJU,(LYP,LLY))));	9
chrB2	14	12737474	13107258	3.69784	((PLE,(PUN,PTI)),(FCA,(AJU,(LYP,LLY))));	3
chrB2	12	13107280	13142475	0.35195	((PLE,(PUN,PTI)),((FCA,AJU),(LYP,LLY)));	1
chrB2	14	13142619	14897350	17.5473	((PLE,(PUN,PTI)),((FCA,AJU),(LYP,LLY)));	1
chrB2	0	14897431	15278741	3.8131	((PLE,(PUN,PTI)),(AJU,(FCA,(LYP,LLY))));	2
chrB2	18	15278941	15279817	0.00876	((PLE,(PUN,PTI)),(AJU,(FCA,(LYP,LLY))));	2
chrB2	14	15279849	16638272	13.5842	((PLE,(PUN,PTI)),((FCA,AJU),(LYP,LLY)));	1
chrB2	12	16638379	16693038	0.54659	((PLE,(PUN,PTI)),(FCA,(AJU,(LYP,LLY))));	3
chrB2	14	16693042	22057355	53.6431	((PLE,(PUN,PTI)),((FCA,AJU),(LYP,LLY)));	1
chrB2	0	22057385	22497736	4.40351	((PLE,(PUN,PTI)),(AJU,(FCA,(LYP,LLY))));	2
chrB2	18	22497822	22498141	0.00319	((PLE,(PUN,PTI)),(FCA,(AJU,(LYP,LLY))));	18
chrB2	14	22498157	22709266	2.11109	((PLE,(PUN,PTI)),((FCA,AJU),(LYP,LLY)));	1
chrB2	33	22709288	22710616	0.01328	((PLE,(PUN,PTI)),((FCA,AJU),(LYP,LLY)));	10
chrB2	0	22710827	24735327	20.245	((PLE,(PUN,PTI)),(AJU,(FCA,(LYP,LLY))));	2
chrB2	12	24735385	24802942	0.67557	((PLE,(PUN,PTI)),(AJU,(FCA,(LYP,LLY))));	2
chrB2	0	24803008	25902721	10.9971	((PLE,(PUN,PTI)),((FCA,AJU),(LYP,LLY)));	1
chrB2	12	25902771	26032319	1.29548	((PTI,(PLE,PUN)),(AJU,(FCA,(LYP,LLY))));	6
chrB2	14	26032645	26445155	4.1251	((PLE,(PUN,PTI)),((FCA,AJU),(LYP,LLY)));	1
chrB2	12	26445209	26460074	0.14865	((PLE,(PUN,PTI)),(FCA,(AJU,(LYP,LLY))));	3
chrB2	17	26460082	26513169	0.53087	((PLE,(PUN,PTI)),((FCA,AJU),(LYP,LLY)));	1
chrB2	0	26513170	27289958	7.76788	((PLE,(PUN,PTI)),((FCA,AJU),(LYP,LLY)));	1
chrB2	33	27290034	27291758	0.01724	((PUN,(PLE,PTI)),((FCA,AJU),(LYP,LLY)));	5
chrB2	12	27291872	28557987	12.6611	((PTI,(PLE,PUN)),(AJU,(FCA,(LYP,LLY))));	6
chrB2	0	28558006	28652430	0.94424	((PLE,(PUN,PTI)),((FCA,AJU),(LYP,LLY)));	1
chrB2	12	28652513	28892052	2.39539	((PLE,(PUN,PTI)),((FCA,AJU),(LYP,LLY)));	1
chrB2	0	28892053	29096191	2.04138	((PLE,(PUN,PTI)),((FCA,AJU),(LYP,LLY)));	1
chrB2	12	29096285	30562889	14.666	((PTI,(PLE,PUN)),((FCA,AJU),(LYP,LLY)));	4
chrB2	32	30564711	30650930	0.86219	((PUN,(PLE,PTI)),((FCA,AJU),(LYP,LLY)));	5
chrB2	14	30651039	30729216	0.78177	((PUN,(PLE,PTI)),(AJU,(FCA,(LYP,LLY))));	7
chrB2	12	30729265	31046337	3.17072	((PTI,(PLE,PUN)),(AJU,(FCA,(LYP,LLY))));	6
chrB2	33	31046429	31049132	0.02703	((PTI,(PLE,PUN)),((FCA,AJU),(LYP,LLY)));	4
chrB2	12	31049333	31288558	2.39225	((PTI,(PLE,PUN)),(FCA,(AJU,(LYP,LLY))));	9
chrB2	17	31288705	31799371	5.10666	((PLE,(PUN,PTI)),(FCA,(AJU,(LYP,LLY))));	3
chrB2	33	31799450	31804691	0.05241	((PUN,(PLE,PTI)),((FCA,AJU),(LYP,LLY)));	5
chrB2	0	31804864	31958097	1.53233	((PUN,(PLE,PTI)),(AJU,(FCA,(LYP,LLY))));	7
chrB2	32	31958314	32078903	1.20589	((PLE,(PUN,PTI)),(FCA,(AJU,(LYP,LLY))));	3
chrB2	0	32079058	32568007	4.88949	((PLE,(PUN,PTI)),(AJU,(FCA,(LYP,LLY))));	2
chrB2	12	32568063	32639535	0.71472	((PUN,(PLE,PTI)),((FCA,AJU),(LYP,LLY)));	5
chrB2	0	32639583	33005654	3.66071	((PLE,(PUN,PTI)),(AJU,(FCA,(LYP,LLY))));	2
chrB2	14	33005702	33692067	6.86365	((PLE,(PUN,PTI)),(AJU,(FCA,(LYP,LLY))));	2
chrB2	12	33692892	33758262	0.6537	((PLE,(PUN,PTI)),(FCA,(AJU,(LYP,LLY))));	3
chrB2	0	33758270	35601412	18.4314	((PLE,(PUN,PTI)),(AJU,(FCA,(LYP,LLY))));	2
chrB2	14	35601558	36770647	11.6909	((PLE,(PUN,PTI)),((FCA,AJU),(LYP,LLY)));	1
chrB2	12	36770749	37020042	2.49293	((PLE,(PUN,PTI)),((FCA,AJU),(LYP,LLY)));	1
chrB2	0	37020108	37323561	3.03453	((PLE,(PUN,PTI)),(AJU,(FCA,(LYP,LLY))));	2
chrB2	12	37323605	37408287	0.84682	((PLE,(PUN,PTI)),(FCA,(AJU,(LYP,LLY))));	3
chrB2	14	37408315	37823444	4.15129	((PLE,(PUN,PTI)),((FCA,AJU),(LYP,LLY)));	1
chrB2	0	37823546	37972767	1.49221	((PLE,(PUN,PTI)),(AJU,(FCA,(LYP,LLY))));	2
chrB2	12	37972916	37989131	0.16215	((PLE,(PUN,PTI)),(AJU,(FCA,(LYP,LLY))));	2
chrB2	14	37989255	38113877	1.24622	((PLE,(PUN,PTI)),((FCA,AJU),(LYP,LLY)));	1
chrB2	30	38113885	38128789	0.14904	((PTI,(PLE,PUN)),(AJU,(FCA,(LYP,LLY))));	6
chrB2	0	38129759	38740071	6.10312	((PLE,(PUN,PTI)),((FCA,AJU),(LYP,LLY)));	1
chrB2	12	38740210	38815828	0.75618	((PLE,(PUN,PTI)),((FCA,AJU),(LYP,LLY)));	1
chrB2	14	38815880	39235254	4.19374	((PLE,(PUN,PTI)),(FCA,(AJU,(LYP,LLY))));	3
chrB2	12	39235291	39309591	0.743	((PLE,(PUN,PTI)),(FCA,(AJU,(LYP,LLY))));	3
chrB2	14	39309592	39654209	3.44617	((PLE,(PUN,PTI)),((FCA,AJU),(LYP,LLY)));	1
chrB2	0	39654291	39853657	1.99366	((PLE,(PUN,PTI)),(AJU,(FCA,(LYP,LLY))));	2
chrB2	30	39853816	39867115	0.13299	((PTI,(PLE,PUN)),((FCA,AJU),(LYP,LLY)));	4
chrB2	12	39867147	39897553	0.30406	((PLE,(PUN,PTI)),(FCA,(AJU,(LYP,LLY))));	3
chrB2	14	39897630	40113777	2.16147	((PLE,(PUN,PTI)),((FCA,AJU),(LYP,LLY)));	1
chrB2	12	40113913	40161998	0.48085	((PLE,(PUN,PTI)),(AJU,(FCA,(LYP,LLY))));	2
chrB2	0	40162004	40350489	1.88485	((PLE,(PUN,PTI)),(FCA,(AJU,(LYP,LLY))));	3
chrB2	12	40350660	40512220	1.6156	((PLE,(PUN,PTI)),((FCA,AJU),(LYP,LLY)));	1
chrB2	14	40513802	40890027	3.76225	((PLE,(PUN,PTI)),(FCA,(AJU,(LYP,LLY))));	3
chrB2	0	40890203	41876753	9.8655	((PLE,(PUN,PTI)),(AJU,(FCA,(LYP,LLY))));	2
chrB2	12	41876778	41971123	0.94345	((PLE,(PUN,PTI)),((FCA,AJU),(LYP,LLY)));	1
chrB2	0	41971195	42751422	7.80227	((PLE,(PUN,PTI)),((FCA,AJU),(LYP,LLY)));	1
chrB2	14	42751513	43207311	4.55798	((PLE,(PUN,PTI)),((FCA,AJU),(LYP,LLY)));	1
chrB2	0	43207344	43885574	6.7823	((PLE,(PUN,PTI)),(AJU,(FCA,(LYP,LLY))));	2
chrB2	14	43885595	45077077	11.9148	((PLE,(PUN,PTI)),((FCA,AJU),(LYP,LLY)));	1
chrB2	18	45077114	45077775	0.00661	((PTI,(PLE,PUN)),(AJU,(FCA,(LYP,LLY))));	6
chrB2	17	45077806	45162973	0.85167	((PLE,(PUN,PTI)),((FCA,AJU),(LYP,LLY)));	1
chrB2	14	45162974	45594258	4.31284	((PLE,(PUN,PTI)),((FCA,AJU),(LYP,LLY)));	1
chrB2	12	45594358	45618877	0.24519	((PUN,(PLE,PTI)),(AJU,(FCA,(LYP,LLY))));	7
chrB2	17	45619021	45658024	0.39003	((PUN,(PLE,PTI)),(FCA,(AJU,(LYP,LLY))));	8
chrB2	12	45659628	45734137	0.74509	((PLE,(PUN,PTI)),(FCA,(AJU,(LYP,LLY))));	3
chrB2	14	45734221	46322059	5.87838	((PLE,(PUN,PTI)),((FCA,AJU),(LYP,LLY)));	1
chrB2	18	46322193	46332044	0.09851	((PLE,(PUN,PTI)),((FCA,AJU),(LYP,LLY)));	31
chrB2	14	46332050	47533866	12.0182	((PLE,(PUN,PTI)),(AJU,(FCA,(LYP,LLY))));	2
chrB2	18	47534056	47536443	0.02387	((PTI,(PLE,PUN)),((FCA,AJU),(LYP,LLY)));	4
chrB2	23	47537041	47556047	0.19006	((PTI,(PLE,PUN)),((FCA,AJU),(LYP,LLY)));	4
chrB2	14	47556469	47944080	3.87611	((PLE,(PUN,PTI)),(AJU,(FCA,(LYP,LLY))));	2
chrB2	33	47944691	47950596	0.05905	((PLE,(PUN,PTI)),((FCA,AJU),(LYP,LLY)));	1
chrB2	0	47950612	48112787	1.62175	((PLE,(PUN,PTI)),(AJU,(FCA,(LYP,LLY))));	2
chrB2	12	48112874	48123130	0.10256	((PLE,(PUN,PTI)),(FCA,(AJU,(LYP,LLY))));	3
chrB2	14	48123417	48286964	1.63547	((PLE,(PUN,PTI)),(AJU,(FCA,(LYP,LLY))));	2
chrB2	23	48287006	48296642	0.09636	((PLE,(PUN,PTI)),((FCA,AJU),(LYP,LLY)));	1
chrB2	17	48296726	48503215	2.06489	((PLE,(PUN,PTI)),(FCA,(AJU,(LYP,LLY))));	3
chrB2	0	48503274	50715614	22.1234	((PLE,(PUN,PTI)),(AJU,(FCA,(LYP,LLY))));	2
chrB2	17	50715625	50796161	0.80536	((PLE,(PUN,PTI)),(AJU,(FCA,(LYP,LLY))));	2
chrB2	0	50796252	50922829	1.26577	((PLE,(PUN,PTI)),(FCA,(AJU,(LYP,LLY))));	3
chrB2	23	50922842	50934844	0.12002	((PUN,(PLE,PTI)),((FCA,AJU),(LYP,LLY)));	5
chrB2	0	50934853	51713873	7.7902	((PLE,(PUN,PTI)),(AJU,(FCA,(LYP,LLY))));	2
chrB2	12	51713925	51814156	1.00231	((PLE,(PUN,PTI)),(FCA,(AJU,(LYP,LLY))));	3
chrB2	14	51814592	52835916	10.2132	((PLE,(PUN,PTI)),(AJU,(FCA,(LYP,LLY))));	2
chrB2	0	52836226	53219401	3.83175	((PLE,(PUN,PTI)),(FCA,(AJU,(LYP,LLY))));	3
chrB2	17	53219573	53304454	0.84881	((PLE,(PUN,PTI)),(AJU,(FCA,(LYP,LLY))));	2
chrB2	12	53304551	53346543	0.41992	((PLE,(PUN,PTI)),((FCA,AJU),(LYP,LLY)));	1
chrB2	17	53346564	53444457	0.97893	((PLE,(PUN,PTI)),(AJU,(FCA,(LYP,LLY))));	2
chrB2	0	53444481	54737541	12.9306	((PLE,(PUN,PTI)),((FCA,AJU),(LYP,LLY)));	1
chrB2	12	54737662	54829619	0.91957	((PLE,(PUN,PTI)),(AJU,(FCA,(LYP,LLY))));	2
chrB2	0	54829647	56099071	12.6942	((PLE,(PUN,PTI)),(AJU,(FCA,(LYP,LLY))));	2
chrB2	30	56099103	56112160	0.13057	((PTI,(PLE,PUN)),((FCA,AJU),(LYP,LLY)));	4
chrB2	0	56112192	57203149	10.9096	((PLE,(PUN,PTI)),(AJU,(FCA,(LYP,LLY))));	2
chrB2	26	57203195	57206283	0.03088	((PUN,(PLE,PTI)),((FCA,AJU),(LYP,LLY)));	5
chrB2	0	57206298	58776765	15.7047	((PLE,(PUN,PTI)),(AJU,(FCA,(LYP,LLY))));	2
chrB2	33	58776789	58778347	0.01558	((PUN,(PLE,PTI)),((FCA,AJU),(LYP,LLY)));	5
chrB2	0	58778395	59575112	7.96717	((PLE,(PUN,PTI)),(AJU,(FCA,(LYP,LLY))));	2
chrB2	23	59575603	59589473	0.1387	((PTI,(PLE,PUN)),((FCA,AJU),(LYP,LLY)));	4
chrB2	12	59589844	59693366	1.03522	((PUN,(PLE,PTI)),(AJU,(FCA,(LYP,LLY))));	7
chrB2	0	59693369	60844536	11.5117	((PLE,(PUN,PTI)),(FCA,(AJU,(LYP,LLY))));	3
chrB2	26	60845939	60854162	0.08223	((PUN,(PLE,PTI)),(FCA,(AJU,(LYP,LLY))));	8
chrB2	0	60854376	61240644	3.86268	((PLE,(PUN,PTI)),((FCA,AJU),(LYP,LLY)));	1
chrB2	12	61240651	61402333	1.61682	((PLE,(PUN,PTI)),(FCA,(AJU,(LYP,LLY))));	3
chrB2	14	61402714	61423946	0.21232	((PUN,(PLE,PTI)),(AJU,(FCA,(LYP,LLY))));	7
chrB2	23	61423970	61452877	0.28907	((PUN,(PLE,PTI)),((FCA,AJU),(LYP,LLY)));	5
chrB2	12	61452880	61779971	3.27091	((PLE,(PUN,PTI)),(AJU,(FCA,(LYP,LLY))));	2
chrB2	0	61780063	63673310	18.9325	((PLE,(PUN,PTI)),((FCA,AJU),(LYP,LLY)));	1
chrB2	33	63673328	63678810	0.05482	((PLE,(PUN,PTI)),((FCA,AJU),(LYP,LLY)));	1
chrB2	0	63678919	64288598	6.09679	((PLE,(PUN,PTI)),((FCA,AJU),(LYP,LLY)));	1
chrB2	12	64288610	64542499	2.53889	((PLE,(PUN,PTI)),(FCA,(AJU,(LYP,LLY))));	3
chrB2	0	64542570	65574165	10.316	((PLE,(PUN,PTI)),(AJU,(FCA,(LYP,LLY))));	2
chrB2	23	65574270	65584155	0.09885	((PTI,(PLE,PUN)),((FCA,AJU),(LYP,LLY)));	4
chrB2	0	65584161	65922327	3.38166	((PUN,(PLE,PTI)),((FCA,AJU),(LYP,LLY)));	5
chrB2	12	65922354	65993770	0.71416	((PLE,(PUN,PTI)),(FCA,(AJU,(LYP,LLY))));	3
chrB2	0	65993775	67324489	13.3071	((PLE,(PUN,PTI)),((FCA,AJU),(LYP,LLY)));	1
chrB2	17	67324514	67499649	1.75135	((PTI,(PLE,PUN)),((FCA,AJU),(LYP,LLY)));	4
chrB2	0	67499741	67975810	4.76069	((PLE,(PUN,PTI)),(FCA,(AJU,(LYP,LLY))));	3
chrB2	17	67976076	68027724	0.51648	((PLE,(PUN,PTI)),((FCA,AJU),(LYP,LLY)));	1
chrB2	26	68027739	68031251	0.03512	((PUN,(PLE,PTI)),(FCA,(AJU,(LYP,LLY))));	8
chrB2	0	68031332	68703809	6.72477	((PLE,(PUN,PTI)),((FCA,AJU),(LYP,LLY)));	1
chrB2	12	68703811	68851545	1.47734	((PLE,(PUN,PTI)),(FCA,(AJU,(LYP,LLY))));	3
chrB2	0	68851670	70344697	14.9303	((PLE,(PUN,PTI)),((FCA,AJU),(LYP,LLY)));	1
chrB2	17	70344922	70541893	1.96971	((PLE,(PUN,PTI)),(AJU,(FCA,(LYP,LLY))));	2
chrB2	12	70542049	70559495	0.17446	((PLE,(PUN,PTI)),(FCA,(AJU,(LYP,LLY))));	3
chrB2	8	70559864	70638627	0.78763	((PLE,(PUN,PTI)),((FCA,AJU),(LYP,LLY)));	1
chrB2	14	70639073	70835036	1.95963	((PLE,(PUN,PTI)),((FCA,AJU),(LYP,LLY)));	1
chrB2	8	70835892	70966959	1.31067	((PLE,(PUN,PTI)),((FCA,AJU),(LYP,LLY)));	1
chrB2	0	70966972	71348691	3.81719	((PLE,(PUN,PTI)),((FCA,AJU),(LYP,LLY)));	1
chrB2	12	71349182	71490647	1.41465	((PLE,(PUN,PTI)),(FCA,(AJU,(LYP,LLY))));	3
chrB2	0	71490747	72230117	7.3937	((PLE,(PUN,PTI)),(FCA,(AJU,(LYP,LLY))));	3
chrB2	8	72230147	72316241	0.86094	((PLE,(PUN,PTI)),((FCA,AJU),(LYP,LLY)));	1
chrB2	12	72316276	72363431	0.47155	((PUN,(PLE,PTI)),(FCA,(AJU,(LYP,LLY))));	8
chrB2	26	72363457	72377905	0.14448	((PUN,(PLE,PTI)),(AJU,(FCA,(LYP,LLY))));	7
chrB2	0	72377921	73036104	6.58183	((PLE,(PUN,PTI)),(AJU,(FCA,(LYP,LLY))));	2
chrB2	26	73036124	73038906	0.02782	((PUN,(PLE,PTI)),((FCA,AJU),(LYP,LLY)));	5
chrB2	23	73039488	73044288	0.048	((PTI,(PLE,PUN)),((FCA,AJU),(LYP,LLY)));	4
chrB2	30	73044316	73060676	0.1636	((PTI,(PLE,PUN)),(AJU,(FCA,(LYP,LLY))));	6
chrB2	0	73060719	73472865	4.12146	((PLE,(PUN,PTI)),(FCA,(AJU,(LYP,LLY))));	3
chrB2	12	73472883	74043120	5.70237	((PLE,(PUN,PTI)),(FCA,(AJU,(LYP,LLY))));	3
chrB2	30	74043296	74063798	0.20502	((PTI,(PLE,PUN)),(FCA,(AJU,(LYP,LLY))));	9
chrB2	12	74063929	74151285	0.87356	((PTI,(PLE,PUN)),(FCA,(AJU,(LYP,LLY))));	9
chrB2	23	74151412	74166408	0.14996	((PUN,(PLE,PTI)),((FCA,AJU),(LYP,LLY)));	5
chrB2	0	74166465	74274418	1.07953	((PTI,(PLE,PUN)),((FCA,AJU),(LYP,LLY)));	4
chrB2	12	74274479	74317225	0.42746	((PTI,(PLE,PUN)),((FCA,AJU),(LYP,LLY)));	4
chrB2	30	74323856	74348853	0.24997	((PTI,(PLE,PUN)),((FCA,AJU),(LYP,LLY)));	4
chrB2	12	74348994	74408488	0.59494	((PLE,(PUN,PTI)),(AJU,(FCA,(LYP,LLY))));	2
chrB2	33	74408509	74410571	0.02062	((PUN,(PLE,PTI)),((FCA,AJU),(LYP,LLY)));	5
chrB2	0	74411221	74709116	2.97895	((PUN,(PLE,PTI)),((FCA,AJU),(LYP,LLY)));	5
chrB2	17	74709367	74812576	1.03209	((PTI,(PLE,PUN)),(FCA,(AJU,(LYP,LLY))));	9
chrB2	0	74812647	75141107	3.2846	((PLE,(PUN,PTI)),(AJU,(FCA,(LYP,LLY))));	2
chrB2	12	75141262	75208565	0.67303	((PTI,(PLE,PUN)),(FCA,(AJU,(LYP,LLY))));	9
chrB2	30	75208575	75223971	0.15396	((PTI,(PLE,PUN)),(FCA,(AJU,(LYP,LLY))));	9
chrB2	26	75224017	75232245	0.08228	((PUN,(PLE,PTI)),((FCA,AJU),(LYP,LLY)));	5
chrB2	0	75232788	75886838	6.5405	((PLE,(PUN,PTI)),(AJU,(FCA,(LYP,LLY))));	2
chrB2	33	75886851	75887670	0.00819	((PLE,(PUN,PTI)),((FCA,AJU),(LYP,LLY)));	1
chrB2	0	75887714	76160140	2.72426	((PLE,(PUN,PTI)),(AJU,(FCA,(LYP,LLY))));	2
chrB2	23	76160214	76193960	0.33746	((PTI,(PLE,PUN)),((FCA,AJU),(LYP,LLY)));	4
chrB2	0	76194042	76924350	7.30308	((PLE,(PUN,PTI)),(FCA,(AJU,(LYP,LLY))));	3
chrB2	12	76924830	76991988	0.67158	((PLE,(PUN,PTI)),(FCA,(AJU,(LYP,LLY))));	3
chrB2	0	76992097	77105343	1.13246	((PLE,(PUN,PTI)),(AJU,(FCA,(LYP,LLY))));	2
chrB2	12	77105397	77151065	0.45668	((PLE,(PUN,PTI)),(AJU,(FCA,(LYP,LLY))));	2
chrB2	0	77151148	77671900	5.20752	((PLE,(PUN,PTI)),((FCA,AJU),(LYP,LLY)));	1
chrB2	18	77678279	77697397	0.19118	((PUN,(PLE,PTI)),(AJU,(FCA,(LYP,LLY))));	7
chrB2	12	77697406	77869410	1.72004	((PLE,(PUN,PTI)),(FCA,(AJU,(LYP,LLY))));	3
chrB2	26	77869415	77873109	0.03694	((PUN,(PLE,PTI)),(AJU,(FCA,(LYP,LLY))));	7
chrB2	0	77873179	78991978	11.188	((PLE,(PUN,PTI)),(AJU,(FCA,(LYP,LLY))));	2
chrB2	23	78992251	79000079	0.07828	((PLE,(PUN,PTI)),((FCA,AJU),(LYP,LLY)));	1
chrB2	12	79000141	79058621	0.5848	((PLE,(PUN,PTI)),(FCA,(AJU,(LYP,LLY))));	3
chrB2	0	79058807	79526220	4.67413	((PLE,(PUN,PTI)),(AJU,(FCA,(LYP,LLY))));	2
chrB2	33	79527250	79529331	0.02081	((PLE,(PUN,PTI)),((FCA,AJU),(LYP,LLY)));	1
chrB2	0	79529460	79897553	3.68093	((PLE,(PUN,PTI)),(AJU,(FCA,(LYP,LLY))));	2
chrB2	12	79897556	80096334	1.98778	((PLE,(PUN,PTI)),(FCA,(AJU,(LYP,LLY))));	3
chrB2	0	80096508	80252908	1.564	((PLE,(PUN,PTI)),(AJU,(FCA,(LYP,LLY))));	2
chrB2	12	80252994	80295029	0.42035	((PLE,(PUN,PTI)),(FCA,(AJU,(LYP,LLY))));	3
chrB2	0	80295257	82271705	19.7645	((PLE,(PUN,PTI)),(FCA,(AJU,(LYP,LLY))));	3
chrB2	12	82271761	82314861	0.431	((PLE,(PUN,PTI)),(AJU,(FCA,(LYP,LLY))));	2
chrB2	0	82314963	83154246	8.39283	((PLE,(PUN,PTI)),(FCA,(AJU,(LYP,LLY))));	3
chrB2	14	83154518	83629299	4.74781	((PLE,(PUN,PTI)),(AJU,(FCA,(LYP,LLY))));	2
chrB2	18	83629313	83629523	0.0021	((PUN,(PLE,PTI)),(AJU,(FCA,(LYP,LLY))));	13
chrB2	0	83629567	86381766	27.522	((PLE,(PUN,PTI)),(AJU,(FCA,(LYP,LLY))));	2
chrB2	17	86383191	86423647	0.40456	((PLE,(PUN,PTI)),((FCA,AJU),(LYP,LLY)));	1
chrB2	33	86423863	86425627	0.01764	((PLE,(PUN,PTI)),((FCA,AJU),(LYP,LLY)));	1
chrB2	0	86425870	87852032	14.2616	((PLE,(PUN,PTI)),(FCA,(AJU,(LYP,LLY))));	3
chrB2	12	87852228	87917673	0.65445	((PLE,(PUN,PTI)),(FCA,(AJU,(LYP,LLY))));	3
chrB2	0	87917847	89256240	13.3839	((PLE,(PUN,PTI)),((FCA,AJU),(LYP,LLY)));	1
chrB2	14	89256241	89953546	6.97305	((PLE,(PUN,PTI)),((FCA,AJU),(LYP,LLY)));	1
chrB2	0	89953558	90254243	3.00685	((PLE,(PUN,PTI)),(FCA,(AJU,(LYP,LLY))));	3
chrB2	8	90254356	90355770	1.01414	((PLE,(PUN,PTI)),(AJU,(FCA,(LYP,LLY))));	2
chrB2	0	90356038	92524519	21.6848	((PLE,(PUN,PTI)),(AJU,(FCA,(LYP,LLY))));	2
chrB2	17	92524520	92700957	1.76437	((PLE,(PUN,PTI)),((FCA,AJU),(LYP,LLY)));	1
chrB2	12	92701246	92941615	2.40369	((PLE,(PUN,PTI)),(AJU,(FCA,(LYP,LLY))));	2
chrB2	14	92941632	93100318	1.58686	((PLE,(PUN,PTI)),(AJU,(FCA,(LYP,LLY))));	2
chrB2	30	93100783	93126898	0.26115	((PTI,(PLE,PUN)),(AJU,(FCA,(LYP,LLY))));	6
chrB2	14	93126942	93321691	1.94749	((PLE,(PUN,PTI)),(AJU,(FCA,(LYP,LLY))));	2
chrB2	12	93322614	93345920	0.23306	((PLE,(PUN,PTI)),((FCA,AJU),(LYP,LLY)));	1
chrB2	17	93345942	93522453	1.76511	((PLE,(PUN,PTI)),((FCA,AJU),(LYP,LLY)));	1
chrB2	0	93522551	93840605	3.18054	((PLE,(PUN,PTI)),(AJU,(FCA,(LYP,LLY))));	2
chrB2	14	93840650	94169448	3.28798	((PLE,(PUN,PTI)),((FCA,AJU),(LYP,LLY)));	1
chrB2	0	94169526	97840630	36.711	((PLE,(PUN,PTI)),(AJU,(FCA,(LYP,LLY))));	2
chrB2	33	97840826	97843693	0.02867	((PUN,(PLE,PTI)),((FCA,AJU),(LYP,LLY)));	5
chrB2	12	97843735	98075792	2.32057	((PUN,(PLE,PTI)),(FCA,(AJU,(LYP,LLY))));	8
chrB2	0	98076173	98217377	1.41204	((PLE,(PUN,PTI)),(AJU,(FCA,(LYP,LLY))));	2
chrB2	33	98217381	98219855	0.02474	((PUN,(PLE,PTI)),((FCA,AJU),(LYP,LLY)));	5
chrB2	14	98219904	98342454	1.2255	((PLE,(PUN,PTI)),((FCA,AJU),(LYP,LLY)));	1
chrB2	12	98342475	98453743	1.11268	((PLE,(PUN,PTI)),(AJU,(FCA,(LYP,LLY))));	2
chrB2	14	98454371	99099914	6.45543	((PLE,(PUN,PTI)),((FCA,AJU),(LYP,LLY)));	1
chrB2	0	99100248	99339598	2.3935	((PLE,(PUN,PTI)),(AJU,(FCA,(LYP,LLY))));	2
chrB2	8	99339617	99441958	1.02341	((PLE,(PUN,PTI)),((FCA,AJU),(LYP,LLY)));	1
chrB2	14	99442436	99680174	2.37738	((PLE,(PUN,PTI)),((FCA,AJU),(LYP,LLY)));	1
chrB2	12	99680417	99762784	0.82367	((PLE,(PUN,PTI)),(AJU,(FCA,(LYP,LLY))));	2
chrB2	14	99762792	100310806	5.48014	((PLE,(PUN,PTI)),((FCA,AJU),(LYP,LLY)));	1
chrB2	0	100310827	100851233	5.40406	((PLE,(PUN,PTI)),(FCA,(AJU,(LYP,LLY))));	3
chrB2	23	100851297	100877871	0.26574	((PUN,(PLE,PTI)),((FCA,AJU),(LYP,LLY)));	5
chrB2	0	100877874	101303279	4.25405	((PLE,(PUN,PTI)),(FCA,(AJU,(LYP,LLY))));	3
chrB2	14	101303475	105685893	43.8242	((PLE,(PUN,PTI)),(AJU,(FCA,(LYP,LLY))));	2
chrB2	12	105685918	105732190	0.46272	((PLE,(PUN,PTI)),(AJU,(FCA,(LYP,LLY))));	2
chrB2	36	105732250	105801575	0.69325	((PTI,(PLE,PUN)),((FCA,AJU),(LYP,LLY)));	4
chrB2	14	105807863	105877329	0.69466	((PUN,(PLE,PTI)),((FCA,AJU),(LYP,LLY)));	5
chrB2	5	105877331	105878222	0.00891	((PLE,(PUN,PTI)),(FCA,(AJU,(LYP,LLY))));	16
chrB2	14	105878365	105945842	0.67477	((PLE,(PUN,PTI)),((FCA,AJU),(LYP,LLY)));	1
chrB2	23	105945899	105978764	0.32865	((PUN,(PLE,PTI)),((FCA,AJU),(LYP,LLY)));	5
chrB2	14	105978784	107463332	14.8455	((PLE,(PUN,PTI)),(AJU,(FCA,(LYP,LLY))));	2
chrB2	12	107463476	107502857	0.39381	((PLE,(PUN,PTI)),(AJU,(FCA,(LYP,LLY))));	2
chrB2	18	107502858	107505733	0.02875	((PLE,(PUN,PTI)),(FCA,(AJU,(LYP,LLY))));	3
chrB2	0	107506192	107854051	3.47859	((PLE,(PUN,PTI)),(AJU,(FCA,(LYP,LLY))));	2
chrB2	12	107854206	107927209	0.73003	((PLE,(PUN,PTI)),(AJU,(FCA,(LYP,LLY))));	2
chrB2	33	107927247	107929440	0.02193	((PTI,(PLE,PUN)),((FCA,AJU),(LYP,LLY)));	4
chrB2	0	107929454	108330959	4.01505	((PLE,(PUN,PTI)),(AJU,(FCA,(LYP,LLY))));	2
chrB2	12	108331005	108451589	1.20584	((PLE,(PUN,PTI)),(AJU,(FCA,(LYP,LLY))));	2
chrB2	0	108451613	108902801	4.51188	((PLE,(PUN,PTI)),(FCA,(AJU,(LYP,LLY))));	3
chrB2	30	108902824	108923352	0.20528	((PTI,(PLE,PUN)),(AJU,(FCA,(LYP,LLY))));	6
chrB2	0	108923441	109192283	2.68842	((PLE,(PUN,PTI)),(FCA,(AJU,(LYP,LLY))));	3
chrB2	8	109192317	109261954	0.69637	((PLE,(PUN,PTI)),((FCA,AJU),(LYP,LLY)));	1
chrB2	12	109262016	109278424	0.16408	((PUN,(PLE,PTI)),((FCA,AJU),(LYP,LLY)));	5
chrB2	8	109278746	109335826	0.5708	((PLE,(PUN,PTI)),((FCA,AJU),(LYP,LLY)));	1
chrB2	0	109336230	110775270	14.3904	((PLE,(PUN,PTI)),(AJU,(FCA,(LYP,LLY))));	2
chrB2	12	110775454	110866688	0.91234	((PLE,(PUN,PTI)),(FCA,(AJU,(LYP,LLY))));	3
chrB2	0	110866709	111127245	2.60536	((PLE,(PUN,PTI)),(AJU,(FCA,(LYP,LLY))));	2
chrB2	12	111127261	111186647	0.59386	((PLE,(PUN,PTI)),(AJU,(FCA,(LYP,LLY))));	2
chrB2	0	111186694	112052367	8.65673	((PLE,(PUN,PTI)),(FCA,(AJU,(LYP,LLY))));	3
chrB2	12	112052434	112138303	0.85869	((PLE,(PUN,PTI)),(AJU,(FCA,(LYP,LLY))));	2
chrB2	0	112138359	113069107	9.30748	((PLE,(PUN,PTI)),(AJU,(FCA,(LYP,LLY))));	2
chrB2	33	113069192	113075509	0.06317	((PLE,(PUN,PTI)),((FCA,AJU),(LYP,LLY)));	1
chrB2	0	113075543	114193090	11.1755	((PLE,(PUN,PTI)),(AJU,(FCA,(LYP,LLY))));	2
chrB2	12	114193128	114381913	1.88785	((PLE,(PUN,PTI)),(FCA,(AJU,(LYP,LLY))));	3
chrB2	23	114381951	114397946	0.15995	((PTI,(PLE,PUN)),((FCA,AJU),(LYP,LLY)));	4
chrB2	0	114398019	114712770	3.14751	((PLE,(PUN,PTI)),(AJU,(FCA,(LYP,LLY))));	2
chrB2	12	114713565	114778506	0.64941	((PLE,(PUN,PTI)),((FCA,AJU),(LYP,LLY)));	1
chrB2	0	114778510	115218369	4.39859	((PLE,(PUN,PTI)),((FCA,AJU),(LYP,LLY)));	1
chrB2	12	115218375	115316806	0.98431	((PLE,(PUN,PTI)),(AJU,(FCA,(LYP,LLY))));	2
chrB2	17	115316987	115373166	0.56179	((PTI,(PLE,PUN)),((FCA,AJU),(LYP,LLY)));	4
chrB2	12	115373258	115387331	0.14073	((PTI,(PLE,PUN)),(AJU,(FCA,(LYP,LLY))));	6
chrB2	30	115387375	115398764	0.11389	((PTI,(PLE,PUN)),((FCA,AJU),(LYP,LLY)));	4
chrB2	0	115398915	117920914	25.22	((PLE,(PUN,PTI)),(AJU,(FCA,(LYP,LLY))));	2
chrB2	14	117920935	120092805	21.7187	((PLE,(PUN,PTI)),((FCA,AJU),(LYP,LLY)));	1
chrB2	17	120092920	120474294	3.81374	((PLE,(PUN,PTI)),((FCA,AJU),(LYP,LLY)));	1
chrB2	14	120474387	122258519	17.8413	((PLE,(PUN,PTI)),((FCA,AJU),(LYP,LLY)));	1
chrB2	17	122258543	122319864	0.61321	((PLE,(PUN,PTI)),((FCA,AJU),(LYP,LLY)));	1
chrB2	0	122319938	122885385	5.65447	((PLE,(PUN,PTI)),((FCA,AJU),(LYP,LLY)));	1
chrB2	17	122885717	122959210	0.73493	((PLE,(PUN,PTI)),((FCA,AJU),(LYP,LLY)));	1
chrB2	14	122959229	123529469	5.7024	((PLE,(PUN,PTI)),(FCA,(AJU,(LYP,LLY))));	3
chrB2	33	123529470	123531035	0.01565	((PLE,(PUN,PTI)),((FCA,AJU),(LYP,LLY)));	1
chrB2	14	123531067	125802999	22.7193	((PLE,(PUN,PTI)),((FCA,AJU),(LYP,LLY)));	1
chrB2	12	125803002	125875474	0.72472	((PLE,(PUN,PTI)),(AJU,(FCA,(LYP,LLY))));	2
chrB2	14	125875539	127236267	13.6073	((PLE,(PUN,PTI)),((FCA,AJU),(LYP,LLY)));	1
chrB2	0	127236276	128460115	12.2384	((PLE,(PUN,PTI)),(AJU,(FCA,(LYP,LLY))));	2
chrB2	17	128460161	128516855	0.56694	((PUN,(PLE,PTI)),(AJU,(FCA,(LYP,LLY))));	7
chrB2	14	128516904	129101785	5.84881	((PLE,(PUN,PTI)),((FCA,AJU),(LYP,LLY)));	1
chrB2	0	129101815	129810385	7.0857	((PLE,(PUN,PTI)),(AJU,(FCA,(LYP,LLY))));	2
chrB2	8	129812442	129900463	0.88021	((PLE,(PUN,PTI)),((FCA,AJU),(LYP,LLY)));	1
chrB2	0	129900496	130545576	6.4508	((PLE,(PUN,PTI)),(FCA,(AJU,(LYP,LLY))));	3
chrB2	17	130545704	130629328	0.83624	((PLE,(PUN,PTI)),(AJU,(FCA,(LYP,LLY))));	2
chrB2	33	130629435	130631028	0.01593	((PUN,(PLE,PTI)),((FCA,AJU),(LYP,LLY)));	5
chrB2	0	130631035	132446580	18.1554	((PLE,(PUN,PTI)),(AJU,(FCA,(LYP,LLY))));	2
chrB2	33	132447222	132448198	0.00976	((PLE,(PUN,PTI)),((FCA,AJU),(LYP,LLY)));	1
chrB2	14	132448762	138748821	63.0006	((PLE,(PUN,PTI)),((FCA,AJU),(LYP,LLY)));	1
chrB2	18	138748832	138749339	0.00507	((PUN,(PLE,PTI)),(AJU,(FCA,(LYP,LLY))));	7
chrB2	8	138749376	138782904	0.33528	((PLE,(PUN,PTI)),((FCA,AJU),(LYP,LLY)));	1
chrB2	33	138782915	138786828	0.03913	((PLE,(PUN,PTI)),((FCA,AJU),(LYP,LLY)));	1
chrB2	14	138786866	139899731	11.1287	((PLE,(PUN,PTI)),(AJU,(FCA,(LYP,LLY))));	2
chrB2	12	139899775	139994761	0.94986	((PUN,(PLE,PTI)),(FCA,(AJU,(LYP,LLY))));	8
chrB2	14	139994786	141636446	16.4166	((PLE,(PUN,PTI)),((FCA,AJU),(LYP,LLY)));	1
chrB2	0	141636778	142193589	5.56811	((PLE,(PUN,PTI)),(AJU,(FCA,(LYP,LLY))));	2
chrB2	18	142193606	142194498	0.00892	((PLE,(PUN,PTI)),(FCA,(AJU,(LYP,LLY))));	3
chrB2	14	142194513	143013821	8.19308	((PLE,(PUN,PTI)),((FCA,AJU),(LYP,LLY)));	1
chrB2	0	143014098	143672877	6.58779	((PLE,(PUN,PTI)),(FCA,(AJU,(LYP,LLY))));	3
chrB2	18	143672889	143673810	0.00921	((PUN,(PLE,PTI)),(AJU,(FCA,(LYP,LLY))));	7
chrB2	14	143673946	144428814	7.54868	((PLE,(PUN,PTI)),((FCA,AJU),(LYP,LLY)));	1
chrB2	0	144428840	144769972	3.41132	((PLE,(PUN,PTI)),(AJU,(FCA,(LYP,LLY))));	2
chrB2	14	144770088	145123452	3.53364	((PLE,(PUN,PTI)),(FCA,(AJU,(LYP,LLY))));	3
chrB2	12	145123517	145147953	0.24436	((PLE,(PUN,PTI)),(AJU,(FCA,(LYP,LLY))));	2
chrB2	14	145148100	145359912	2.11812	((PLE,(PUN,PTI)),(AJU,(FCA,(LYP,LLY))));	2
chrB2	17	145359933	145470479	1.10546	((PLE,(PUN,PTI)),((FCA,AJU),(LYP,LLY)));	1
chrB2	18	145470507	145471229	0.00722	((PLE,(PUN,PTI)),(FCA,(AJU,(LYP,LLY))));	52
chrB2	14	145471566	146670420	11.9885	((PLE,(PUN,PTI)),(AJU,(FCA,(LYP,LLY))));	2
chrB2	33	146670437	146672529	0.02092	((PUN,(PLE,PTI)),((FCA,AJU),(LYP,LLY)));	5
chrB2	0	146672559	147389306	7.16747	((PLE,(PUN,PTI)),((FCA,AJU),(LYP,LLY)));	1
chrB2	12	147389308	147514156	1.24848	((PLE,(PUN,PTI)),(AJU,(FCA,(LYP,LLY))));	2
chrB2	14	147514237	148998000	14.8376	((PLE,(PUN,PTI)),((FCA,AJU),(LYP,LLY)));	1
chrB2	18	148998016	148998533	0.00517	((PLE,(PUN,PTI)),(FCA,(AJU,(LYP,LLY))));	3
chrB2	14	148998536	150938545	19.4001	((PLE,(PUN,PTI)),((FCA,AJU),(LYP,LLY)));	1
chrB2	12	150938554	151007278	0.68724	((PLE,(PUN,PTI)),((FCA,AJU),(LYP,LLY)));	1
chrB2	18	151007304	151007681	0.00377	((PLE,(PUN,PTI)),(FCA,(AJU,(LYP,LLY))));	11
chrB2	12	151007685	151084905	0.7722	((PLE,(PUN,PTI)),(FCA,(AJU,(LYP,LLY))));	3
chrB2	14	151084981	151896494	8.11513	((PLE,(PUN,PTI)),(AJU,(FCA,(LYP,LLY))));	2
chrB2	12	151896502	151927561	0.31059	((PLE,(PUN,PTI)),((FCA,AJU),(LYP,LLY)));	1
chrB2	0	151927587	152211699	2.84112	((PLE,(PUN,PTI)),(FCA,(AJU,(LYP,LLY))));	3
chrB2	0	152231654	152425192	1.93538	((PUN,(PLE,PTI)),(AJU,(FCA,(LYP,LLY))));	7
chrB2	18	152425282	152425471	0.00189	((PLE,(PUN,PTI)),(AJU,(FCA,(LYP,LLY))));	76
chrB2	17	152425474	152434126	0.08652	((PLE,(PUN,PTI)),((FCA,AJU),(LYP,LLY)));	1
chrB2	12	152434127	152513668	0.79541	((PUN,(PLE,PTI)),(AJU,(FCA,(LYP,LLY))));	7
chrB2	0	152513701	152996097	4.82396	((PUN,(PLE,PTI)),(AJU,(FCA,(LYP,LLY))));	7
chrB3	27	8847	188479	1.79632	((PLE,(PUN,PTI)),(FCA,(AJU,(LYP,LLY))));	14
chrB3	36	191648	272765	0.81117	((PUN,(PLE,PTI)),((FCA,AJU),(LYP,LLY)));	5
chrB3	17	272885	305190	0.32305	((PUN,(PLE,PTI)),((FCA,AJU),(LYP,LLY)));	5
chrB3	36	305337	593586	2.88249	((PLE,(PUN,PTI)),((FCA,AJU),(LYP,LLY)));	1
chrB3	17	594789	646302	0.51513	((PLE,(PUN,PTI)),((FCA,AJU),(LYP,LLY)));	1
chrB3	36	646313	709256	0.62943	((PLE,(PUN,PTI)),((FCA,AJU),(LYP,LLY)));	1
chrB3	17	709263	819222	1.09959	((PLE,(PUN,PTI)),((FCA,AJU),(LYP,LLY)));	1
chrB3	0	819235	868649	0.49414	((PLE,(PUN,PTI)),(AJU,(FCA,(LYP,LLY))));	2
chrB3	17	868661	947742	0.79081	((PLE,(PUN,PTI)),(FCA,(AJU,(LYP,LLY))));	3
chrB3	36	947759	1058479	1.1072	((PLE,(PUN,PTI)),((FCA,AJU),(LYP,LLY)));	1
chrB3	17	1058489	1095451	0.36962	((PLE,(PUN,PTI)),((FCA,AJU),(LYP,LLY)));	1
chrB3	36	1095487	1535175	4.39688	((PLE,(PUN,PTI)),((FCA,AJU),(LYP,LLY)));	1
chrB3	17	1535180	1559912	0.24732	((PLE,(PUN,PTI)),(FCA,(AJU,(LYP,LLY))));	3
chrB3	36	1560012	1921207	3.61195	((PLE,(PUN,PTI)),(FCA,(AJU,(LYP,LLY))));	3
chrB3	17	1921214	1952034	0.3082	((PUN,(PLE,PTI)),(AJU,(FCA,(LYP,LLY))));	7
chrB3	36	1952066	2136320	1.84254	((PLE,(PUN,PTI)),((FCA,AJU),(LYP,LLY)));	1
chrB3	17	2136367	2226237	0.8987	((PLE,(PUN,PTI)),((FCA,AJU),(LYP,LLY)));	1
chrB3	36	2226777	2437800	2.11023	((PLE,(PUN,PTI)),((FCA,AJU),(LYP,LLY)));	1
chrB3	17	2437840	2458410	0.2057	((PLE,(PUN,PTI)),((FCA,AJU),(LYP,LLY)));	1
chrB3	36	2458563	2975203	5.1664	((PLE,(PUN,PTI)),((FCA,AJU),(LYP,LLY)));	1
chrB3	17	2975319	3027130	0.51811	((PLE,(PUN,PTI)),((FCA,AJU),(LYP,LLY)));	1
chrB3	36	3027611	4413521	13.8591	((PLE,(PUN,PTI)),((FCA,AJU),(LYP,LLY)));	1
chrB3	4	4415853	4499594	0.83741	((PLE,(PUN,PTI)),((FCA,AJU),(LYP,LLY)));	1
chrB3	36	4500019	6564673	20.6465	((PLE,(PUN,PTI)),((FCA,AJU),(LYP,LLY)));	1
chrB3	1	6564679	6670571	1.05892	((PLE,(PUN,PTI)),(FCA,(AJU,(LYP,LLY))));	3
chrB3	36	6670572	9853992	31.8342	((PLE,(PUN,PTI)),(FCA,(AJU,(LYP,LLY))));	3
chrB3	1	9854016	10090385	2.36369	((PLE,(PUN,PTI)),((FCA,AJU),(LYP,LLY)));	1
chrB3	36	10090509	17393719	73.0321	((PLE,(PUN,PTI)),((FCA,AJU),(LYP,LLY)));	1
chrB3	1	17393745	17458853	0.65108	((PLE,(PUN,PTI)),((FCA,AJU),(LYP,LLY)));	1
chrB3	0	17458987	18252928	7.93941	((PLE,(PUN,PTI)),(AJU,(FCA,(LYP,LLY))));	2
chrB3	1	18253021	18415159	1.62138	((PLE,(PUN,PTI)),(FCA,(AJU,(LYP,LLY))));	3
chrB3	0	18416990	18613119	1.96129	((PLE,(PUN,PTI)),((FCA,AJU),(LYP,LLY)));	1
chrB3	1	18613157	18783464	1.70307	((PLE,(PUN,PTI)),((FCA,AJU),(LYP,LLY)));	1
chrB3	0	18783471	19863109	10.7964	((PLE,(PUN,PTI)),(AJU,(FCA,(LYP,LLY))));	2
chrB3	1	19863133	20006118	1.42985	((PLE,(PUN,PTI)),(FCA,(AJU,(LYP,LLY))));	3
chrB3	32	20008187	20023861	0.15674	((PTI,(PLE,PUN)),(AJU,(FCA,(LYP,LLY))));	6
chrB3	0	20023963	21112199	10.8824	((PLE,(PUN,PTI)),(FCA,(AJU,(LYP,LLY))));	3
chrB3	4	21112205	21123667	0.11462	((PLE,(PUN,PTI)),(AJU,(FCA,(LYP,LLY))));	2
chrB3	36	21123724	21563845	4.40121	((PLE,(PUN,PTI)),(FCA,(AJU,(LYP,LLY))));	3
chrB3	4	21563951	21604608	0.40657	((PLE,(PUN,PTI)),(FCA,(AJU,(LYP,LLY))));	3
chrB3	0	21605106	21805713	2.00607	((PLE,(PUN,PTI)),(FCA,(AJU,(LYP,LLY))));	3
chrB3	1	21808774	22100551	2.91777	((PLE,(PUN,PTI)),(AJU,(FCA,(LYP,LLY))));	2
chrB3	36	22100837	22210767	1.0993	((PLE,(PUN,PTI)),((FCA,AJU),(LYP,LLY)));	1
chrB3	1	22210868	22758751	5.47883	((PLE,(PUN,PTI)),(FCA,(AJU,(LYP,LLY))));	3
chrB3	13	22758826	22765784	0.06958	((PLE,(PUN,PTI)),((FCA,AJU),(LYP,LLY)));	1
chrB3	1	22765844	22960640	1.94796	((PLE,(PUN,PTI)),((FCA,AJU),(LYP,LLY)));	1
chrB3	13	22960770	22970529	0.09759	((PLE,(PUN,PTI)),((FCA,AJU),(LYP,LLY)));	1
chrB3	4	22970537	24342558	13.7202	((PLE,(PUN,PTI)),(AJU,(FCA,(LYP,LLY))));	2
chrB3	4	24351888	25050520	6.98632	((PTI,(PLE,PUN)),(AJU,(FCA,(LYP,LLY))));	6
chrB3	1	25050721	25681545	6.30824	((PUN,(PLE,PTI)),((FCA,AJU),(LYP,LLY)));	5
chrB3	4	25681585	26741987	10.604	((PLE,(PUN,PTI)),(FCA,(AJU,(LYP,LLY))));	3
chrB3	1	26742120	26864055	1.21935	((PUN,(PLE,PTI)),(AJU,(FCA,(LYP,LLY))));	7
chrB3	4	26864258	27196442	3.32184	((PLE,(PUN,PTI)),(FCA,(AJU,(LYP,LLY))));	3
chrB3	36	27196619	27257789	0.6117	((PLE,(PUN,PTI)),((FCA,AJU),(LYP,LLY)));	1
chrB3	4	27257795	27357071	0.99276	((PLE,(PUN,PTI)),((FCA,AJU),(LYP,LLY)));	1
chrB3	1	27357072	27472297	1.15225	((PLE,(PUN,PTI)),((FCA,AJU),(LYP,LLY)));	1
chrB3	17	27472304	27542048	0.69744	((PLE,(PUN,PTI)),((FCA,AJU),(LYP,LLY)));	1
chrB3	13	27542100	27546638	0.04538	((PUN,(PLE,PTI)),((FCA,AJU),(LYP,LLY)));	5
chrB3	4	27546659	28727445	11.8079	((PLE,(PUN,PTI)),(FCA,(AJU,(LYP,LLY))));	3
chrB3	10	28727535	28740667	0.13132	((PTI,(PLE,PUN)),(AJU,(FCA,(LYP,LLY))));	6
chrB3	4	28740900	28997690	2.5679	((PTI,(PLE,PUN)),(AJU,(FCA,(LYP,LLY))));	6
chrB3	1	28997724	30646312	16.4859	((PLE,(PUN,PTI)),(AJU,(FCA,(LYP,LLY))));	2
chrB3	36	30646326	30903722	2.57396	((PLE,(PUN,PTI)),(AJU,(FCA,(LYP,LLY))));	2
chrB3	1	30903723	31167777	2.64054	((PLE,(PUN,PTI)),(AJU,(FCA,(LYP,LLY))));	2
chrB3	0	31167893	31646588	4.78695	((PLE,(PUN,PTI)),(AJU,(FCA,(LYP,LLY))));	2
chrB3	4	31646674	31695555	0.48881	((PLE,(PUN,PTI)),((FCA,AJU),(LYP,LLY)));	1
chrB3	36	31695565	32341103	6.45538	((PLE,(PUN,PTI)),((FCA,AJU),(LYP,LLY)));	1
chrB3	11	32341117	32343012	0.01895	((PTI,(PLE,PUN)),(FCA,(AJU,(LYP,LLY))));	9
chrB3	36	32343017	32496989	1.53972	((PLE,(PUN,PTI)),(FCA,(AJU,(LYP,LLY))));	3
chrB3	1	32497036	32616742	1.19706	((PLE,(PUN,PTI)),(FCA,(AJU,(LYP,LLY))));	3
chrB3	36	32616869	33427094	8.10225	((PLE,(PUN,PTI)),(AJU,(FCA,(LYP,LLY))));	2
chrB3	1	33427204	33561759	1.34555	((PLE,(PUN,PTI)),(AJU,(FCA,(LYP,LLY))));	2
chrB3	36	33561787	33831787	2.7	((PLE,(PUN,PTI)),((FCA,AJU),(LYP,LLY)));	1
chrB3	13	33831917	33844553	0.12636	((PLE,(PUN,PTI)),((FCA,AJU),(LYP,LLY)));	1
chrB3	1	33844589	34142084	2.97495	((PLE,(PUN,PTI)),(AJU,(FCA,(LYP,LLY))));	2
chrB3	36	34142094	37316641	31.7455	((PLE,(PUN,PTI)),((FCA,AJU),(LYP,LLY)));	1
chrB3	1	37316808	37532803	2.15995	((PTI,(PLE,PUN)),((FCA,AJU),(LYP,LLY)));	4
chrB3	36	37532841	39478045	19.452	((PLE,(PUN,PTI)),(FCA,(AJU,(LYP,LLY))));	3
chrB3	1	39478082	39510642	0.3256	((PLE,(PUN,PTI)),(FCA,(AJU,(LYP,LLY))));	3
chrB3	0	39510690	40555949	10.4526	((PLE,(PUN,PTI)),(AJU,(FCA,(LYP,LLY))));	2
chrB3	1	40555962	41171566	6.15604	((PLE,(PUN,PTI)),(AJU,(FCA,(LYP,LLY))));	2
chrB3	0	41171633	41306623	1.3499	((PLE,(PUN,PTI)),(AJU,(FCA,(LYP,LLY))));	2
chrB3	1	41306630	41642157	3.35527	((PLE,(PUN,PTI)),(FCA,(AJU,(LYP,LLY))));	3
chrB3	36	41642180	42051729	4.09549	((PLE,(PUN,PTI)),((FCA,AJU),(LYP,LLY)));	1
chrB3	13	42052418	42072430	0.20012	((PLE,(PUN,PTI)),((FCA,AJU),(LYP,LLY)));	1
chrB3	36	42072453	43110206	10.3775	((PLE,(PUN,PTI)),((FCA,AJU),(LYP,LLY)));	1
chrB3	11	43110224	43113262	0.03038	((PLE,(PUN,PTI)),(FCA,(AJU,(LYP,LLY))));	30
chrB3	0	43113402	44371816	12.5841	((PLE,(PUN,PTI)),(AJU,(FCA,(LYP,LLY))));	2
chrB3	4	44371869	44404625	0.32756	((PTI,(PLE,PUN)),((FCA,AJU),(LYP,LLY)));	4
chrB3	0	44404689	44874698	4.70009	((PLE,(PUN,PTI)),(AJU,(FCA,(LYP,LLY))));	2
chrB3	1	44874723	44985740	1.11017	((PLE,(PUN,PTI)),((FCA,AJU),(LYP,LLY)));	1
chrB3	0	44985741	45950757	9.65016	((PLE,(PUN,PTI)),(AJU,(FCA,(LYP,LLY))));	2
chrB3	4	45950787	46016082	0.65295	((PLE,(PUN,PTI)),(FCA,(AJU,(LYP,LLY))));	3
chrB3	0	46016199	47442376	14.2618	((PLE,(PUN,PTI)),((FCA,AJU),(LYP,LLY)));	1
chrB3	4	47442482	47668426	2.25944	((PUN,(PLE,PTI)),(AJU,(FCA,(LYP,LLY))));	7
chrB3	1	47668602	48182060	5.13458	((PLE,(PUN,PTI)),((FCA,AJU),(LYP,LLY)));	1
chrB3	0	48183416	48726350	5.42934	((PLE,(PUN,PTI)),(AJU,(FCA,(LYP,LLY))));	2
chrB3	1	48726663	48980266	2.53603	((PLE,(PUN,PTI)),(FCA,(AJU,(LYP,LLY))));	3
chrB3	0	48980759	49768248	7.87489	((PLE,(PUN,PTI)),(FCA,(AJU,(LYP,LLY))));	3
chrB3	17	49768281	49806990	0.38709	((PLE,(PUN,PTI)),((FCA,AJU),(LYP,LLY)));	1
chrB3	0	49807013	50929448	11.2243	((PLE,(PUN,PTI)),((FCA,AJU),(LYP,LLY)));	1
chrB3	1	50929457	51074724	1.45267	((PUN,(PLE,PTI)),(FCA,(AJU,(LYP,LLY))));	8
chrB3	19	51074787	51084321	0.09534	((PUN,(PLE,PTI)),((FCA,AJU),(LYP,LLY)));	5
chrB3	1	51084468	52018384	9.33916	((PLE,(PUN,PTI)),(AJU,(FCA,(LYP,LLY))));	2
chrB3	13	52018469	52041648	0.23179	((PTI,(PLE,PUN)),((FCA,AJU),(LYP,LLY)));	4
[truncated: 2,331 more rows]

## Sheet: S7-Positive_selection
Lynx_protein	Branch	Human_protein	Human_gene	Gene_name	Description	PDB	Phenotype	N positively selected sites p>0.99	N positively selected sites p>0.95	Sum PS sites	PS sites
LYPA23A000112P2	Lynx_sp	ENSP00000354916	ENSG00000079335	CDC14A	cell division cycle 14A [Source:HGNC Symbol;Acc:1718]			0	0	0	[('327', 'S', '0.902'), ('562', 'G', '0.889'), ('564', 'N', '0.881'), ('565', 'S', '0.889'), ('566', 'A', '0.785'), ('567', 'K', '0.883'), ('568', 'E', '0.852'), ('569', 'A', '0.890')]
LYPA23A000251P2	Lynx_sp	ENSP00000262462	ENSG00000113396	SLC27A6	solute carrier family 27 (fatty acid transporter), member 6 [Source:HGNC Symbol;Acc:11000]			1	1	2	[('197', 'L', '0.691'), ('295', 'Q', '0.715'), ('602', 'T', '0.721'), ('610', 'M', '0.655'), ('611', 'S', '0.541'), ('613', 'E', '0.988*'), ('615', 'K', '0.996**'), ('616', 'L', '0.749')]
LYPA23A000805P1	Lynx_sp	ENSP00000443647	ENSG00000127423	AUNIP	aurora kinase A and ninein interacting protein [Source:HGNC Symbol;Acc:28363]			1	0	1	[('1', 'Q', '0.990**'), ('209', 'S', '0.684'), ('266', 'A', '0.631'), ('267', 'R', '0.687'), ('303', 'G', '0.576')]
LYPA23A001087P3	Lynx_sp	ENSP00000230124	ENSG00000112367	FIG4	FIG4 homolog, SAC1 lipid phosphatase domain containing (S. cerevisiae) [Source:HGNC Symbol;Acc:16873]		Amyotrophic lateral sclerosis, AMYOTROPHIC LATERAL SCLEROSIS 11, Charcot-Marie-Tooth disease type 4J, CLEIDOCRANIAL DYSPLASIA WITH MICROGNATHIA ABSENT THUMBS AND DISTAL APHALANGIA YUNIS-VARON SYNDROME, Primary lateral sclerosis, Yunis-Varon syndrome	0	1	1	[('257', 'K', '0.973*')]
LYPA23A001499P1	Lynx_sp	ENSP00000349325	ENSG00000206190	ATP10A	ATPase, class V, type 10A [Source:HGNC Symbol;Acc:13542]		ANGELMAN SYNDROME	0	0	0	[('418', 'A', '0.846'), ('895', 'S', '0.943')]
LYPA23A001590P1	Lynx_sp	ENSP00000462898	ENSG00000264162	ITGA10	integrin, alpha 10 [Source:HGNC Symbol;Acc:6135]			0	0	0	[('1016', 'N', '0.867'), ('1017', 'G', '0.756')]
LYPA23A002026P1	Lynx_sp	ENSP00000230993	ENSG00000113073	SLC4A9	solute carrier family 4, sodium bicarbonate cotransporter, member 9 [Source:HGNC Symbol;Acc:11035]			0	1	1	[('250', 'V', '0.968*'), ('272', 'A', '0.939'), ('722', 'A', '0.913'), ('773', 'L', '0.595')]
LYPA23A002226P2	Lynx_sp	ENSP00000384081	ENSG00000084710	EFR3B	EFR3 homolog B (S. cerevisiae) [Source:HGNC Symbol;Acc:29155]			1	0	1	[('1', 'G', '0.809'), ('813', 'C', '0.808'), ('814', 'V', '0.895'), ('815', 'Y', '0.996**')]
LYPA23A002274P1	Lynx_sp	LRG_190p1	LRG_190	MEFV	Mediterranean fever [Source:HGNC Symbol;Acc:6998]		FAMILIAL MEDITERRANEAN FEVER	0	1	1	[('2', 'I', '0.819'), ('3', 'K', '0.966*'), ('4', 'T', '0.760'), ('5', 'P', '0.559'), ('6', 'S', '0.833'), ('52', 'K', '0.761'), ('240', 'R', '0.556')]
LYPA23A003102P1	Lynx_sp	ENSP00000323246	ENSG00000165891	E2F7	E2F transcription factor 7 [Source:HGNC Symbol;Acc:23820]			0	0	0	[('330', 'T', '0.927'), ('472', 'P', '0.660')]
LYPA23A003113P1	Lynx_sp	ENSP00000253925	ENSG00000131626	PPFIA1	protein tyrosine phosphatase, receptor type, f polypeptide (PTPRF), interacting protein (liprin), alpha 1 [Source:HGNC Symbol;Acc:9245]			0	0	0	[('514', 'P', '0.910')]
LYPA23A003269P1	Lynx_sp	ENSP00000444537	ENSG00000198960	ARMCX6	armadillo repeat containing, X-linked 6 [Source:HGNC Symbol;Acc:26094]			0	1	1	[('7', 'D', '0.990*')]
LYPA23A003348P3	Lynx_sp	ENSP00000370077	ENSG00000164989	CCDC171	coiled-coil domain containing 171 [Source:HGNC Symbol;Acc:29828]			0	0	0	[('301', 'N', '0.873'), ('675', 'S', '0.815'), ('774', 'R', '0.850')]
LYPA23A004092P1	Lynx_sp	ENSP00000385867	ENSG00000166960	CCDC178	coiled-coil domain containing 178 [Source:HGNC Symbol;Acc:29588]			1	0	1	[('54', 'P', '0.995**'), ('55', 'K', '0.639'), ('136', 'T', '0.687')]
LYPA23A004106P1	Lynx_sp	ENSP00000270861	ENSG00000142731	PLK4	polo-like kinase 4 [Source:HGNC Symbol;Acc:11397]	3COK		0	2	2	[('400', 'P', '0.798'), ('557', 'S', '0.969*'), ('558', 'L', '0.963*')]
LYPA23A004110P1	Lynx_sp	ENSP00000393926	ENSG00000164070	HSPA4L	heat shock 70kDa protein 4-like [Source:HGNC Symbol;Acc:17041]			0	0	0	[('460', 'V', '0.832'), ('461', 'G', '0.575')]
LYPA23A004891P1	Lynx_sp	ENSP00000346693	ENSG00000197977	ELOVL2	ELOVL fatty acid elongase 2 [Source:HGNC Symbol;Acc:14416]			0	2	2	[('1', 'M', '0.951*'), ('277', 'R', '0.981*')]
LYPA23A005075P1	Lynx_sp	ENSP00000286190	ENSG00000155749	ALS2CR12	amyotrophic lateral sclerosis 2 (juvenile) chromosome region, candidate 12 [Source:HGNC Symbol;Acc:14439]			0	0	0	[('348', 'Q', '0.872')]
LYPA23A005135P1	Lynx_sp	ENSP00000359018	ENSG00000162641	AKNAD1	AKNA domain containing 1 [Source:HGNC Symbol;Acc:28398]			0	1	1	[('63', 'I', '0.606'), ('67', 'A', '0.717'), ('182', 'P', '0.794'), ('411', 'E', '0.927'), ('412', 'P', '0.937'), ('414', 'S', '0.633'), ('416', 'N', '0.618'), ('418', 'D', '0.668'), ('419', 'K', '0.585'), ('420', 'A', '0.976*'), ('421', 'L', '0.927'), ('423', 'V', '0.564'), ('425', 'S', '0.940')]
LYPA23A005650P1	Lynx_sp	ENSP00000385704	ENSG00000137573	SULF1	sulfatase 1 [Source:HGNC Symbol;Acc:20391]		Mesomelia-synostoses syndrome	0	1	1	[('500', 'P', '0.962*'), ('606', 'Q', '0.810')]
LYPA23A005803P1	Lynx_sp	ENSP00000352926	ENSG00000197905	TEAD4	TEA domain family member 4 [Source:HGNC Symbol;Acc:11717]			1	2	3	[('315', 'I', '0.998**'), ('316', 'Q', '0.981*'), ('317', 'K', '0.983*')]
LYPA23A005857P1	Lynx_sp	ENSP00000237837	ENSG00000118972	FGF23	fibroblast growth factor 23 [Source:HGNC Symbol;Acc:3680]	2P39	Autosomal dominant hypophosphatemic rickets, Hypercalcemic tumoral calcinosis, HYPOPHOSPHATEMIC RICKETS AUTOSOMAL DOMINANT, TUMORAL CALCINOSIS HYPERPHOSPHATEMIC FAMILIAL	1	0	1	[('189', 'S', '0.811'), ('192', 'W', '0.996**'), ('195', 'D', '0.815')]
LYPA23A006114P1	Lynx_sp	ENSP00000220584	ENSG00000079459	FDFT1	farnesyl-diphosphate farnesyltransferase 1 [Source:HGNC Symbol;Acc:3629]	1EZF, 3ASX, 3LEE, 3Q2Z, 3Q30, 3V66, 3VJ8, 3VJ9, 3VJA, 3VJB, 3VJC		1	0	1	[('34', 'K', '0.824'), ('178', 'W', '0.990**'), ('179', 'S', '0.926')]
LYPA23A006295P1	Lynx_sp	ENSP00000318804	ENSG00000176390	CRLF3	cytokine receptor-like factor 3 [Source:HGNC Symbol;Acc:17177]			0	2	2	[('1', 'Q', '0.976*'), ('41', 'T', '0.961*')]
LYPA23A006348P1	Lynx_lynx	ENSP00000337991	ENSG00000179119	SPTY2D1	SPT2, Suppressor of Ty, domain containing 1 (S. cerevisiae) [Source:HGNC Symbol;Acc:26818]			0	0	0	[('382', 'T', '0.566'), ('465', 'H', '0.886')]
LYPA23A006348P1	Lynx_sp	ENSP00000337991	ENSG00000179119	SPTY2D1	SPT2, Suppressor of Ty, domain containing 1 (S. cerevisiae) [Source:HGNC Symbol;Acc:26818]			0	0	0	[('382', 'T', '0.566'), ('465', 'H', '0.886')]
LYPA23A006501P2	Lynx_sp	ENSP00000301962	ENSG00000106346	USP42	ubiquitin specific peptidase 42 [Source:HGNC Symbol;Acc:20068]			0	1	1	[('147', 'V', '0.989*')]
LYPA23A006540P1	Lynx_sp	ENSP00000330930	ENSG00000182319	SGK223	Tyrosine-protein kinase SgK223 [Source:UniProtKB/Swiss-Prot;Acc:Q86YV5]			0	0	0	[('82', 'T', '0.526'), ('136', 'E', '0.750'), ('283', 'C', '0.561'), ('504', 'R', '0.570'), ('565', 'G', '0.583')]
LYPA23A006822P1	Lynx_sp	ENSP00000276480	ENSG00000147488	ST18	suppression of tumorigenicity 18 (breast carcinoma) (zinc finger protein) [Source:HGNC Symbol;Acc:18695]	2CS8		0	0	0	[('2', 'P', '0.521'), ('3', 'E', '0.565'), ('4', 'L', '0.561'), ('158', 'S', '0.736'), ('309', 'Q', '0.778')]
LYPA23A007158P1	Lynx_sp	ENSP00000387278	ENSG00000082126	MPP4	membrane protein, palmitoylated 4 (MAGUK p55 subfamily member 4) [Source:HGNC Symbol;Acc:13680]			0	2	2	[('2', 'T', '0.978*'), ('330', 'R', '0.757'), ('345', 'C', '0.984*')]
LYPA23A007168P1	Lynx_sp	ENSP00000290846	ENSG00000100416	TRMU	tRNA 5-methylaminomethyl-2-thiouridylate methyltransferase [Source:HGNC Symbol;Acc:25481]		Acute infantile liver failure due to mtDNA-encoded proteins synthesis defect, Acute infantile liver failure due to synthesis defect of mtDNA-encoded proteins, Deafness aminoglycoside-induced, LIVER FAILURE INFANTILE TRANSIENT, Mitochondrial myopathy with reversible cytochrome C oxidase deficiency, Mitochondrial nonsyndromic sensorineural deafness	0	0	0	[('3', 'R', '0.888'), ('4', 'R', '0.813'), ('5', 'R', '0.776'), ('143', 'R', '0.888'), ('155', 'V', '0.893')]
LYPA23A007226P2	Lynx_sp	ENSP00000320434	ENSG00000119326	CTNNAL1	catenin (cadherin-associated protein), alpha-like 1 [Source:HGNC Symbol;Acc:2512]			0	0	0	[('140', 'N', '0.923'), ('553', 'G', '0.704'), ('554', 'Q', '0.943'), ('555', 'N', '0.935')]
LYPA23A007268P1	Lynx_sp	ENSP00000291416	ENSG00000116525	TRIM62	tripartite motif containing 62 [Source:HGNC Symbol;Acc:25574]			0	0	0	[('78', 'E', '0.927'), ('79', 'T', '0.870')]
LYPA23A007420P1	Lynx_sp	ENSP00000424372	ENSG00000123552	USP45	ubiquitin specific peptidase 45 [Source:HGNC Symbol;Acc:20080]			1	0	1	[('606', 'N', '0.992**')]
LYPA23A007818P1	Lynx_sp	ENSP00000369497	ENSG00000139618	BRCA2	breast cancer 2, early onset [Source:HGNC Symbol;Acc:1101]	1N0W, 3EU7	BREAST CANCER, BREAST-OVARIAN CANCER FAMILIAL SUSCEPTIBILITY TO 2, Familial pancreatic carcinoma, Familial prostate cancer, Fanconi anemia, FANCONI ANEMIA COMPLEMENTATION GROUP A, Fanconi anemia complementation group D type 1 (FANCD1), FANCONI ANEMIA COMPLEMENTATION GROUP D1, GLIOMA SUSCEPTIBILITY 3, Hereditary breast and ovarian cancer syndrome, Hereditary breast cancer, Hereditary site-specific…	0	0	0	[('901', 'E', '0.875')]
LYPA23A007846P1	Lynx_sp	ENSP00000385927	ENSG00000176623	RMDN1	regulator of microtubule dynamics 1 [Source:HGNC Symbol;Acc:24285]			0	2	2	[('59', 'N', '0.964*'), ('188', 'V', '0.917'), ('189', 'V', '0.931'), ('190', 'C', '0.753'), ('191', 'C', '0.693'), ('192', 'P', '0.703'), ('194', 'L', '0.839'), ('195', 'S', '0.959*')]
LYPA23A008001P1	Lynx_lynx	ENSP00000318480	ENSG00000136758	YME1L1	YME1-like 1 ATPase [Source:HGNC Symbol;Acc:12843]			1	1	2	[('397', 'T', '0.882'), ('406', 'D', '0.903'), ('433', 'P', '0.901'), ('434', 'G', '0.975*'), ('435', 'R', '0.994**')]
LYPA23A008153P1	Lynx_sp	ENSP00000435421	ENSG00000165490	C11orf82	chromosome 11 open reading frame 82 [Source:HGNC Symbol;Acc:26351]			0	0	0	[('33', 'I', '0.676'), ('35', 'V', '0.531'), ('93', 'Y', '0.931'), ('95', 'Q', '0.579'), ('298', 'A', '0.586'), ('598', 'S', '0.611'), ('683', 'H', '0.524'), ('833', 'L', '0.724')]
LYPA23A008182P1	Lynx_sp	ENSP00000464030	ENSG00000263528	IKBKE	inhibitor of kappa light polypeptide gene enhancer in B-cells, kinase epsilon [Source:HGNC Symbol;Acc:14552]			0	0	0	[]
LYPA23A008195P1	Lynx_sp	ENSP00000356191	ENSG00000188770	OPTC	opticin [Source:HGNC Symbol;Acc:8158]			0	0	0	[]
LYPA23A008538P1	Lynx_sp	ENSP00000324920	ENSG00000179008	C14orf39	chromosome 14 open reading frame 39 [Source:HGNC Symbol;Acc:19849]			1	1	2	[('186', 'V', '0.961*'), ('187', 'N', '0.999**'), ('188', 'L', '0.947'), ('189', 'R', '0.850'), ('305', 'N', '0.600')]
LYPA23A008612P1	Lynx_sp	ENSP00000245255	ENSG00000125207	PIWIL1	piwi-like RNA-mediated gene silencing 1 [Source:HGNC Symbol;Acc:9007]	2L5C, 2L5D, 3O3I, 3O6E, 3O7V		1	1	2	[('19', 'Q', '0.870'), ('64', 'L', '0.995**'), ('65', 'Q', '0.986*')]
LYPA23A008783P1	Lynx_sp	ENSP00000326649	ENSG00000107521	HPS1	Hermansky-Pudlak syndrome 1 [Source:HGNC Symbol;Acc:5163]		Hermansky-Pudlak syndrome with pulmonary fibrosis	0	2	2	[('321', 'D', '0.619'), ('489', 'H', '0.665'), ('519', 'T', '0.967*'), ('520', 'Y', '0.651'), ('521', 'L', '0.976*')]
LYPA23A008941P1	Lynx_sp	ENSP00000387911	ENSG00000140694	PARN	poly(A)-specific ribonuclease [Source:HGNC Symbol;Acc:8609]	2A1R, 2A1S, 3CTR		0	0	0	[('528', 'Q', '0.873')]
LYPA23A008999P3	Lynx_sp	ENSP00000355607	ENSG00000116906	GNPAT	glyceronephosphate O-acyltransferase [Source:HGNC Symbol;Acc:4416]		rhizomelic chondrodysplasia punctata type 2 (RCDP2)	0	0	0	[('237', 'S', '0.938'), ('336', 'Q', '0.930'), ('398', 'L', '0.931'), ('464', 'T', '0.936')]
LYPA23A009128P1	Lynx_sp	ENSP00000316029	ENSG00000137076	TLN1	talin 1 [Source:HGNC Symbol;Acc:11845]1SYQ, 4DJ9			0	1	1	[('282', 'L', '0.958*'), ('1225', 'N', '0.674'), ('1926', 'S', '0.697')]
LYPA23A009188P1	Lynx_sp	ENSP00000373884	ENSG00000198838	RYR3	ryanodine receptor 3 [Source:HGNC Symbol;Acc:10485]	4ERV		1	3	4	[('931', 'A', '0.752'), ('1826', 'T', '0.920'), ('3357', 'F', '0.764'), ('4657', 'T', '0.989*'), ('4658', 'F', '0.763'), ('4661', 'Q', '0.990**'), ('4662', 'L', '0.987*'), ('4663', 'G', '0.973*')]
LYPA23A009372P1	Lynx_sp	ENSP00000371471	ENSG00000134321	RSAD2	radical S-adenosyl methionine domain containing 2 [Source:HGNC Symbol;Acc:30908]			0	2	2	[('27', 'S', '0.911'), ('45', 'K', '0.913'), ('46', 'S', '0.978*'), ('47', 'P', '0.961*'), ('48', 'P', '0.838'), ('68', 'A', '0.562'), ('170', 'Q', '0.944')]
LYPA23A009396P2	Lynx_sp	ENSP00000386674	ENSG00000153237	CCDC148	coiled-coil domain containing 148 [Source:HGNC Symbol;Acc:25191]			0	3	3	[('1', 'M', '0.962*'), ('2', 'T', '0.976*'), ('3', 'S', '0.977*'), ('155', 'Q', '0.946'), ('186', 'Y', '0.947')]
LYPA23A009611P1	Lynx_sp	ENSP00000301328	ENSG00000167699	GLOD4	glyoxalase domain containing 4 [Source:HGNC Symbol;Acc:14111]	3ZI1		0	1	1	[('211', 'L', '0.954*'), ('212', 'S', '0.931')]
LYPA23A010085P1	Lynx_sp	LRG_356p1	LRG_356	IL17F	interleukin 17F [Source:HGNC Symbol;Acc:16404]			0	2	2	[('1', 'Q', '0.980*'), ('15', 'L', '0.954*')]
LYPA23A010114P1	Lynx_sp	ENSP00000256969	ENSG00000134548	C12orf39	chromosome 12 open reading frame 39 [Source:HGNC Symbol;Acc:28139]			0	0	0	[('64', 'P', '0.939'), ('65', 'G', '0.541')]
LYPA23A010213P1	Lynx_sp	ENSP00000284601	ENSG00000154415	PPP1R3A	protein phosphatase 1, regulatory subunit 3A [Source:HGNC Symbol;Acc:9291]		DIABETES MELLITUS NONINSULIN-DEPENDENT	0	0	0	[('213', 'E', '0.597'), ('276', 'R', '0.719')]
LYPA23A010524P1	Lynx_sp	ENSP00000265140	ENSG00000133302	ANKRD32	ankyrin repeat domain 32 [Source:HGNC Symbol;Acc:25408]			0	0	0	[('175', 'A', '0.904')]
LYPA23A010808P1	Lynx_lynx	ENSP00000381791	ENSG00000205683	DPF3	D4, zinc and double PHD fingers, family 3 [Source:HGNC Symbol;Acc:17427]			0	0	0	[]
LYPA23A010981P2	Lynx_sp	ENSP00000299492	ENSG00000166387	PPFIBP2	PTPRF interacting protein, binding protein 2 (liprin beta 2) [Source:HGNC Symbol;Acc:9250]	3QH9		0	0	0	[('864', 'Q', '0.913'), ('865', 'I', '0.707'), ('866', 'S', '0.639')]
LYPA23A011532P2	Lynx_sp	ENSP00000272430	ENSG00000114993	RTKN	rhotekin [Source:HGNC Symbol;Acc:10466]			0	1	1	[('337', 'A', '0.958*'), ('508', 'R', '0.711')]
LYPA23A011615P2	Lynx_sp	ENSP00000328083	ENSG00000183111	ARHGEF37	Rho guanine nucleotide exchange factor (GEF) 37 [Source:HGNC Symbol;Acc:34430]			0	0	0	[('14', 'E', '0.542'), ('225', 'R', '0.618'), ('379', 'S', '0.567'), ('632', 'G', '0.943')]
LYPA23A011616P1	Lynx_sp	ENSP00000377789	ENSG00000171992	SYNPO	synaptopodin [Source:HGNC Symbol;Acc:30672]			0	0	0	[]
LYPA23A012131P2	Lynx_sp	ENSP00000417085	ENSG00000163406	SLC15A2	solute carrier family 15 (H+/peptide transporter), member 2 [Source:HGNC Symbol;Acc:10921]			0	0	0	[('365', 'R', '0.683'), ('470', 'Y', '0.907')]
LYPA23A012322P1	Lynx_sp	ENSP00000474113	ENSG00000270886	GP6	glycoprotein VI (platelet) [Source:HGNC Symbol;Acc:14388]		BLEEDING DISORDER PLATELET-TYPE 11	0	0	0	[('3', 'G', '0.758'), ('4', 'L', '0.597'), ('67', 'S', '0.853')]
LYPA23A012465P1	Lynx_sp	ENSP00000431876	ENSG00000118369	USP35	ubiquitin specific peptidase 35 [Source:HGNC Symbol;Acc:20061]			0	2	2	[('295', 'E', '0.868'), ('415', 'I', '0.861'), ('485', 'R', '0.929'), ('486', 'R', '0.973*'), ('487', 'K', '0.980*'), ('488', 'W', '0.760'), ('489', 'R', '0.615')]
LYPA23A013774P1	Lynx_sp	ENSP00000361840	ENSG00000124159	MATN4	matrilin 4 [Source:HGNC Symbol;Acc:6910]			0	0	0	[('103', 'R', '0.925'), ('400', 'N', '0.944')]
LYPA23A013994P1	Lynx_lynx	ENSP00000444369	ENSG00000154493	C10orf90	chromosome 10 open reading frame 90 [Source:HGNC Symbol;Acc:26563]			0	3	3	[('180', 'R', '0.580'), ('293', 'H', '0.841'), ('366', 'P', '0.705'), ('367', 'A', '0.985*'), ('368', 'P', '0.582'), ('370', 'K', '0.600'), ('371', 'P', '0.827'), ('372', 'A', '0.986*'), ('373', 'P', '0.620'), ('375', 'E', '0.940'), ('376', 'R', '0.931'), ('377', 'P', '0.691'), ('378', 'E', '0.939'), ('379', 'T', '0.976*')]
LYPA23A014191P1	Lynx_sp	ENSP00000337451	ENSG00000044524	EPHA3	EPH receptor A3 [Source:HGNC Symbol;Acc:3387]	2GSF, 2QO2, 2QO7, 2QO9, 2QOB, 2QOC, 2QOD, 2QOF, 2QOI, 2QOK, 2QOL, 2QON, 2QOO, 2QOQ, 3DZQ, 3FXX, 3FY2, 4G2F, 4GK2, 4GK3, 4GK4	COLORECTAL CANCER	0	0	0	[('128', 'L', '0.790'), ('509', 'G', '0.908'), ('510', 'G', '0.907')]
LYPA23A014271P1	Lynx_sp	ENSP00000377344	ENSG00000137628	DDX60	DEAD (Asp-Glu-Ala-Asp) box polypeptide 60 [Source:HGNC Symbol;Acc:25942]			0	0	0	[('1372', 'S', '0.901'), ('1373', 'V', '0.668'), ('1542', 'N', '0.554')]
LYPA23A014399P1	Lynx_sp	ENSP00000304713	ENSG00000170903	MSANTD4	Myb/SANT-like DNA-binding domain containing 4 with coiled-coils [Source:HGNC Symbol;Acc:29383]			1	3	4	[('89', 'V', '0.815'), ('96', 'L', '0.959*'), ('197', 'C', '0.959*'), ('220', 'L', '0.941'), ('222', 'R', '1.000**'), ('226', 'R', '0.957*')]
LYPA23A014411P1	Lynx_sp	ENSP00000459838	ENSG00000262764	PPP2R1B	protein phosphatase 2, regulatory subunit A, beta [Source:HGNC Symbol;Acc:9303]			0	0	0	[('1', 'L', '0.650'), ('96', 'P', '0.883'), ('344', 'Y', '0.880'), ('561', 'L', '0.720'), ('563', 'L', '0.663'), ('564', 'A', '0.799')]
LYPA23A014486P1	Lynx_sp	ENSP00000381430	ENSG00000161647	MPP3	membrane protein, palmitoylated 3 (MAGUK p55 subfamily member 3) [Source:HGNC Symbol;Acc:7221]		mental retardation X-linked type 90 (MRX90)	1	0	1	[('393', 'R', '0.786'), ('395', 'W', '0.997**'), ('452', 'M', '0.779')]
LYPA23A014519P1	Lynx_sp	ENSP00000386834	ENSG00000144218	AFF3	AF4/FMR2 family, member 3 [Source:HGNC Symbol;Acc:6473]			1	0	1	[('57', 'K', '0.994**')]
LYPA23A014547P1	Lynx_sp	ENSP00000390590	ENSG00000181418	DDN	dendrin [Source:HGNC Symbol;Acc:24458]			0	0	0	[('238', 'G', '0.727')]
LYPA23A014765P2	Lynx_sp	ENSP00000368719	ENSG00000187583	PLEKHN1	pleckstrin homology domain containing, family N member 1 [Source:HGNC Symbol;Acc:25284]			0	1	1	[('1', 'S', '0.975*'), ('48', 'H', '0.643'), ('178', 'Q', '0.502'), ('227', 'F', '0.673'), ('363', 'T', '0.612')]
LYPA23A014821P1	Lynx_sp	ENSP00000262848	ENSG00000183943	PRKX	protein kinase, X-linked [Source:HGNC Symbol;Acc:9441]			1	1	2	[('210', 'N', '0.998**'), ('211', 'G', '0.989*'), ('212', 'A', '0.845')]
LYPA23A015140P1	Lynx_sp	ENSP00000288139	ENSG00000157388	CACNA1D	calcium channel, voltage-dependent, L type, alpha 1D subunit [Source:HGNC Symbol;Acc:1391]	3LV3	Sinoatrial node dysfunction and deafness	1	1	2	[('1079', 'H', '0.998**'), ('1082', 'T', '0.758'), ('1090', 'A', '0.787'), ('1091', 'L', '0.915'), ('1094', 'V', '0.795'), ('1097', 'V', '0.758'), ('1098', 'V', '0.791'), ('1100', 'I', '0.971*'), ('1102', 'I', '0.822'), ('1103', 'T', '0.809'), ('1105', 'V', '0.777'), ('1106', 'N', '0.821')]
LYPA23A015175P1	Lynx_sp	ENSP00000265529	ENSG00000088727	KIF9	kinesin family member 9 [Source:HGNC Symbol;Acc:16666]	3NWN		0	0	0	[('370', 'L', '0.865')]
LYPA23A015372P1	Lynx_sp	ENSP00000327539	ENSG00000169045	HNRNPH1	heterogeneous nuclear ribonucleoprotein H1 (H) [Source:HGNC Symbol;Acc:5041]		Precursor T-cell acute lymphoblastic leukemia	0	0	0	[('82', 'G', '0.838'), ('106', 'E', '0.856'), ('219', 'G', '0.833'), ('375', 'G', '0.507'), ('376', 'S', '0.921')]
LYPA23A015393P1	Lynx_sp	ENSP00000218006	ENSG00000101890	GUCY2F	guanylate cyclase 2F, retinal [Source:HGNC Symbol;Acc:4691]			0	1	1	[('1051', 'Q', '0.965*'), ('1052', 'N', '0.716')]
LYPA23A015892P1	Lynx_sp	ENSP00000408464	ENSG00000107099	DOCK8	dedicator of cytokinesis 8 [Source:HGNC Symbol;Acc:19191]		hyperimmunoglobulin E recurrent infection syndrome autosomal recessive (AR-HIES), Autosomal dominant nonsyndromic intellectual deficit, Autosomal recessive hyper IgE syndrome, Combined immunodeficiency due to DOCK8 deficiency, HYPER-IgE RECURRENT INFECTION SYNDROME AUTOSOMAL RECESSIVE, MENTAL RETARDATION AUTOSOMAL DOMINANT 2, mental retardation autosomal dominant type 2 (MRD2)	0	0	0	[('794', 'D', '0.591'), ('868', 'C', '0.724')]
LYPA23A016431P1	Lynx_sp	ENSP00000379865	ENSG00000147576	ADHFE1	alcohol dehydrogenase, iron containing, 1 [Source:HGNC Symbol;Acc:16354]			0	0	0	[]
LYPA23A016553P1	Lynx_sp	ENSP00000382204	ENSG00000171988	JMJD1C	jumonji domain containing 1C [Source:HGNC Symbol;Acc:12313]	2YPD		0	0	0	[]
LYPA23A016611P1	Lynx_sp	ENSP00000402152	ENSG00000070915	SLC12A3	solute carrier family 12 (sodium/chloride transporters), member 3 [Source:HGNC Symbol;Acc:10912]		GITELMAN SYNDROME	1	0	1	[('425', 'L', '0.997**'), ('426', 'I', '0.843'), ('893', 'C', '0.844'), ('990', 'H', '0.840')]
LYPA23A016855P2	Lynx_sp	ENSP00000258349	ENSG00000135870	RC3H1	ring finger and CCCH-type domains 1 [Source:HGNC Symbol;Acc:29434]			1	0	1	[('670', 'D', '0.992**'), ('1116', 'N', '0.852')]
LYPA23A017274P1	Lynx_sp	ENSP00000264161	ENSG00000115866	DARS	aspartyl-tRNA synthetase [Source:HGNC Symbol;Acc:2678]	4J15	Hypomyelination with Brain Stem and Spinal Cord Involvement and Leg Spasticity.	0	0	0	[('252', 'Q', '0.855')]
LYPA23A018065P1	Lynx_sp	ENSP00000451126	ENSG00000188488	SERPINA5	serpin peptidase inhibitor, clade A (alpha-1 antiproteinase, antitrypsin), member 5 [Source:HGNC Symbol;Acc:8723]	1LQ8, 1PAI, 2HI9, 2OL2, 2PAI, 3DY0		1	1	2	[('323', 'I', '0.863'), ('347', 'E', '0.848'), ('355', 'L', '0.819'), ('368', 'T', '0.795'), ('393', 'D', '0.825'), ('398', 'A', '0.868'), ('400', 'I', '0.991**'), ('401', 'N', '0.948'), ('402', 'K', '0.965*')]
LYPA23A019044P5	Lynx_sp	ENSP00000364754	ENSG00000126217	MCF2L	MCF.2 cell line derived transforming sequence-like [Source:HGNC Symbol;Acc:14576]			0	0	0	[('40', 'K', '0.759'), ('245', 'V', '0.566'), ('304', 'E', '0.741'), ('920', 'V', '0.752')]
LYPA23A019055P1	Lynx_sp	ENSP00000353654	ENSG00000134871	COL4A2	collagen, type IV, alpha 2 [Source:HGNC Symbol;Acc:2203]	1LI1	Familial porencephaly, HEMORRHAGE INTRACEREBRAL SUSCEPTIBILITY TO, Porencephaly 2	0	2	2	[('1620', 'V', '0.645'), ('1622', 'M', '0.980*'), ('1623', 'K', '0.616'), ('1624', 'N', '0.956*')]
LYPA23A019337P1	Lynx_sp	ENSP00000332407	ENSG00000184860	SDR42E1	short chain dehydrogenase/reductase family 42E, member 1 [Source:HGNC Symbol;Acc:29834]			0	0	0	[('389', 'V', '0.839'), ('391', 'L', '0.788'), ('392', 'S', '0.877'), ('393', 'L', '0.884')]
LYPA23A019735P1	Lynx_sp	ENSP00000386770	ENSG00000197653	DNAH10	dynein, axonemal, heavy chain 10 [Source:HGNC Symbol;Acc:2941]			1	2	3	[('39', 'V', '0.820'), ('120', 'Q', '0.821'), ('123', 'S', '0.823'), ('555', 'K', '0.992**'), ('556', 'K', '0.974*'), ('747', 'I', '0.819'), ('934', 'T', '0.576'), ('1179', 'A', '0.505'), ('1263', 'H', '0.828'), ('1264', 'I', '0.825'), ('1447', 'I', '0.819'), ('1455', 'A', '0.988*'), ('1794', 'M', '0.824'), ('2145', 'A', '0.651'), ('2226', 'L', '0.779'), ('2480', 'D', '0.752'), ('2481', 'M', '0.8…
LYPA23A019762P1	Lynx_sp	ENSP00000474253	ENSG00000139718	SETD1B	SET domain containing 1B [Source:HGNC Symbol;Acc:29187]			0	2	2	[('254', 'A', '0.766'), ('984', 'E', '0.895'), ('1189', 'S', '0.776'), ('1190', 'T', '0.979*'), ('1291', 'K', '0.985*')]
LYPA23A020290P2	Lynx_sp	ENSP00000013125	ENSG00000012983	MAP4K5	mitogen-activated protein kinase kinase kinase kinase 5 [Source:HGNC Symbol;Acc:6867]			0	1	1	[('341', 'I', '0.607'), ('389', 'I', '0.958*')]
LYPA23A021126P1	Lynx_sp	ENSP00000216489	ENSG00000100601	ALKBH1	alkB, alkylation repair homolog 1 (E. coli) [Source:HGNC Symbol;Acc:17911]			1	0	1	[('38', 'A', '0.898'), ('50', 'H', '0.992**'), ('51', 'L', '0.835')]
LYPA23A021217P8	Lynx_sp	ENSP00000349436	ENSG00000143537	ADAM15	ADAM metallopeptidase domain 15 [Source:HGNC Symbol;Acc:193]			0	4	4	[('75', 'E', '0.979*'), ('158', 'K', '0.979*'), ('163', 'Q', '0.721'), ('178', 'A', '0.959*'), ('229', 'T', '0.964*'), ('283', 'V', '0.916'), ('365', 'G', '0.873')]
LYPA23A021419P1	Lynx_sp	ENSP00000414109	ENSG00000123485	HJURP	Holliday junction recognition protein [Source:HGNC Symbol;Acc:25444]	3R45		0	2	2	[('27', 'T', '0.956*'), ('28', 'E', '0.978*'), ('88', 'P', '0.539'), ('377', 'S', '0.680'), ('391', 'G', '0.598'), ('449', 'R', '0.527')]
LYPA23A021622P1	Lynx_sp	ENSP00000261435	ENSG00000078177	N4BP2	NEDD4 binding protein 2 [Source:HGNC Symbol;Acc:29851]	2D9I, 2VKC, 3BHB, 3FAU		0	0	0	[('45', 'R', '0.608'), ('515', 'D', '0.892'), ('809', 'S', '0.879'), ('914', 'L', '0.834'), ('1236', 'S', '0.880'), ('1457', 'V', '0.901')]
LYPA23A021799P1	Lynx_sp	ENSP00000335463	ENSG00000137812	CASC5	cancer susceptibility candidate 5 [Source:HGNC Symbol;Acc:24054]	3SI5, 4A1G	Autosomal recessive primary microcephaly, MICROCEPHALY 4 PRIMARY AUTOSOMAL RECESSIVE	0	0	0	[('380', 'I', '0.878')]
LYPA23A022113P1	Lynx_sp	ENSP00000344871	ENSG00000142347	MYO1F	myosin IF [Source:HGNC Symbol;Acc:7600]			0	0	0	[('98', 'V', '0.820'), ('299', 'V', '0.824'), ('323', 'H', '0.802'), ('428', 'D', '0.540'), ('463', 'I', '0.837')]
LYPA23A022267P1	Lynx_sp	ENSP00000295414	ENSG00000163249	CCNYL1	cyclin Y-like 1 [Source:HGNC Symbol;Acc:26868]			1	0	1	[('2', 'P', '0.992**'), ('265', 'I', '0.867')]
LYPA23A022677P1	Lynx_sp	ENSP00000357330	ENSG00000116539	ASH1L	ash1 (absent, small, or homeotic)-like (Drosophila) [Source:HGNC Symbol;Acc:19088]	3MQM, 3OPE	Intellectual disability	0	1	1	[('103', 'I', '0.782'), ('686', 'A', '0.778'), ('1750', 'V', '0.762'), ('2501', 'N', '0.798'), ('2506', 'S', '0.753'), ('2508', 'R', '0.966*')]
LYPA23A022735P1	Lynx_sp	ENSP00000294016	ENSG00000162104	ADCY9	adenylate cyclase 9 [Source:HGNC Symbol;Acc:240]			1	0	1	[('50', 'A', '0.859'), ('51', 'G', '0.859'), ('52', 'G', '0.991**')]
LYPA23A022893P1	Lynx_sp	ENSP00000248550	ENSG00000006576	PHTF2	putative homeodomain transcription factor 2 [Source:HGNC Symbol;Acc:13411]			0	0	0	[]

## Sheet: S8-Z∆H_outliers_windows
List of GO terms significantly enriched in windows of high and low diversity in Iberian lynx populations or of high of low difference with respect to Eurasian
Aspect	ID	Name	Enriched in
Function	GO:0004984	olfactory receptor activity	High_H_DON_20kb, High_H_POOL_20Kb, High_H_DON_150kb, High_H_POOL_150Kb, Low_Z_dif, High_Z_dif
Function	GO:0004930	G-protein coupled receptor activity	High_H_DON_20kb, High_H_POOL_20Kb, High_H_DON_150kb, High_H_POOL_150Kb, Low_Z_dif, High_Z_dif
Process	GO:0007186	G-protein coupled receptor signaling pathway	High_H_DON_20kb, High_H_POOL_20Kb, High_H_DON_150kb, High_H_POOL_150Kb, Low_Z_dif, High_Z_dif
Process	GO:0050911	detection of chemical stimulus involved in sensory perception of smell	High_H_DON_20kb, High_H_POOL_20Kb, High_H_DON_150kb, High_H_POOL_150Kb, Low_Z_dif, High_Z_dif
Component	GO:0005886	plasma membrane	High_H_DON_150kb, High_H_POOL_150Kb, Low_Z-dif
Component	GO:0016021	integral component of membrane	High_H_DON_150kb, High_H_POOL_150Kb, Low_Z-dif
Process	GO:0033003	regulation of mast cell activation	High_H_POOL_150Kb
Function	GO:0016503	pheromone receptor activity	Low_Z_diff
Function	GO:0001594	trace-amine receptor activity	Low_Z_diff
Function	GO:0004866	endopeptidase inhibitor activity	Low_Z_diff
Process	GO:0003333	amino acid transmembrane transport	Low_Z_diff
Process	GO:0010828	positive regulation of glucose transport	Low_Z_diff
Function	GO:0015171	amino acid transmembrane transporter activity	Low_Z_diff
Process	GO:0010866	regulation of triglyceride biosynthetic process	Low_Z_diff
Function	GO:0031715	C5L2 anaphylatoxin chemotactic receptor binding	Low_Z_diff
Process	GO:0048747	muscle fiber development	Low_H_SMO_20Kb, Low_H_POOL_20Kb, Low_H_SMO_150Kb, Low_H_POOL_150Kb
Process	GO:0046716	muscle cell cellular homeostasis	Low_H_SMO_20Kb, Low_H_POOL_20Kb, Low_H_SMO_150Kb, Low_H_POOL_150Kb
Component	GO:0043034	costamere	Low_H_SMO_20Kb, Low_H_POOL_20Kb, Low_H_SMO_150Kb, Low_H_POOL_150Kb
Component	GO:0016010	dystrophin-associated glycoprotein complex	Low_H_SMO_20Kb, Low_H_POOL_20Kb, Low_H_SMO_150Kb, Low_H_POOL_150Kb
Process	GO:0043043	peptide biosynthetic process	Low_H_SMO_20Kb, Low_H_POOL_20Kb, Low_H_SMO_150Kb, Low_H_POOL_150Kb
Function	GO:0002162	dystroglycan binding	Low_H_SMO_20Kb, Low_H_POOL_20Kb, Low_H_SMO_150Kb, Low_H_POOL_150Kb
Function	GO:0050998	nitric-oxide synthase binding	Low_H_SMO_20Kb, Low_H_POOL_20Kb, Low_H_SMO_150Kb, Low_H_POOL_150Kb
Component	GO:0044306	neuron projection terminus	Low_H_SMO_20Kb, Low_H_POOL_20Kb, Low_H_SMO_150Kb, Low_H_POOL_150Kb
Process	GO:0045213	neurotransmitter receptor metabolic process	Low_H_SMO_20Kb, Low_H_POOL_20Kb, Low_H_SMO_150Kb, Low_H_POOL_150Kb
Process	GO:0051647	nucleus localization	Low_H_SMO_20Kb, Low_H_POOL_20Kb, Low_H_SMO_150Kb, Low_H_POOL_150Kb
Component	GO:0030055	cell-substrate junction	Low_H_SMO_20Kb, Low_H_POOL_20Kb, Low_H_SMO_150Kb, Low_H_POOL_150Kb
Process	GO:0021629	olfactory nerve structural organization	Low_H_SMO_20Kb, Low_H_POOL_20Kb, Low_H_SMO_150Kb, Low_H_POOL_150Kb
Process	GO:0008065	establishment of blood-nerve barrier	Low_H_SMO_20Kb, Low_H_POOL_20Kb, Low_H_SMO_150Kb, Low_H_POOL_150Kb
Process	GO:0060857	establishment of glial blood-brain barrier	Low_H_SMO_20Kb, Low_H_POOL_20Kb, Low_H_SMO_150Kb, Low_H_POOL_150Kb
Process	GO:0014904	myotube cell development	Low_H_SMO_20Kb, Low_H_POOL_20Kb, Low_H_SMO_150Kb, Low_H_POOL_150Kb
Process	GO:0042384	cilium assembly	Low_H_SMO_20Kb, Low_H_POOL_20Kb
Process	GO:0044780	bacterial-type flagellum assembly	Low_H_SMO_20Kb, Low_H_POOL_20Kb
Process	GO:2000651	positive regulation of sodium ion transmembrane transporter activity	Low_H_SMO_20Kb, Low_H_POOL_20Kb
Process	GO:0086001	cardiac muscle cell action potential	Low_H_SMO_20Kb, Low_H_POOL_20Kb
Process	GO:1901385	regulation of voltage-gated calcium channel activity	Low_H_SMO_20Kb, Low_H_POOL_20Kb
Process	GO:0060314	regulation of ryanodine-sensitive calcium-release channel activity	Low_H_SMO_20Kb, Low_H_POOL_20Kb
Process	GO:0014809	regulation of skeletal muscle contraction by regulation of release of sequestered calcium ion	Low_H_SMO_20Kb, Low_H_POOL_20Kb
Process	GO:0090287	regulation of cellular response to growth factor stimulus	Low_H_SMO_20Kb, Low_H_POOL_20Kb
Process	GO:2000169	regulation of peptidyl-cysteine S-nitrosylation	Low_H_SMO_20Kb, Low_H_POOL_20Kb
Process	GO:0006413	translational initiation	Low_H_POOL_20Kb
Process	GO:0019083	viral transcription	Low_H_POOL_20Kb
Function	GO:0008307	structural constituent of muscle	Low_H_POOL_20Kb, Low_H_SMO_150Kb, Low_H_POOL_150Kb
Component	GO:0045211	postsynaptic membrane	Low_H_SMO_150Kb, Low_H_POOL_150Kb
Component	GO:0042383	sarcolemma	Low_H_SMO_150Kb, Low_H_POOL_150Kb
Component	GO:0045121	membrane raft	Low_H_SMO_150Kb, Low_H_POOL_150Kb
